# Supplementary material for: Biofilm Associated Genotypes of Multiple Antibiotic Resistant Pseudomonas Aeruginosa
Source: Research Square preprint supplement (doi:10.21203/rs.3.rs-112816/v1), 2020-12-01
Supplement: Supplementary file 1 [file 9ddb0b061dd995ada431d603.xlsx]

## Sheet: Suppl. Table 1
			Suppl. Table 1 - Details of isolates used in temperature-dependant biofilm analysis
			Names of isolates used in genomic analysis	Average biofilm OD at 37C	Average biofilm OD at 22C	Accession number
			WH-SGI-V-07060	2.55	0.31	GCA_001449145.1
			WH-SGI-V-07056	1.211	1.384	GCA_001450325.1
			WH-SGI-V-07053	1.8805	0.987	GCA_001450345.1
			WH-SGI-V-07058	1.874	1.424	GCA_001449155.1
			WH-SGI-V-07055	1.21	1.161	GCA_001450355.1
			WH-SGI-V-07074	3.292	1.394	GCA_001449175.1
			WH-SGI-V-07057	2.931	3.3	GCA_001449165.1
			WH-SGI-V-07065	0.262	0.963	GCA_001450385.1
			WH-SGI-V-07068	3.303	3.362	GCA_001449225.1
			WH-SGI-V-07049	2.216	1.25	GCA_001449245.1
			WH-SGI-V-07067	2.649	2.993	GCA_001450405.1
			WH-SGI-V-07073	1.446	0.517	GCA_001449255.1
			WH-SGI-V-07071	1.665	0.778	GCA_001449275.1
			WH-SGI-V-07054	1.351	0.382	GCA_001450425.1
			WH-SGI-V-07063	2.654	1.182	GCA_001449305.1
			WH-SGI-V-07070	1.153	0.624	GCA_001449325.1
			WH-SGI-V-07061	1.026	1.209	GCA_001450435.1
			WH-SGI-V-07062	3.04	1.584	GCA_001449345.1
			WH-SGI-V-07064	1.39	3.142	GCA_001450465.1
			WH-SGI-V-07051	0.478	1.824	GCA_001449365.1
			WH-SGI-V-07066	0.856	3.417	GCA_001449395.1
			WH-SGI-V-07069	0.674	0.609	GCA_001449425.1
			WH-SGI-V-07059	1.477	3.417	GCA_001450485.1
			WH-SGI-V-07050	0.536	2.983	GCA_001449435.1
			WH-SGI-V-07165	0.226	0.193	GCA_001449465.1
			WH-SGI-V-07166	3.023	2.492	GCA_001449485.1
			WH-SGI-V-07167	1.717	2.525	GCA_001449505.1
			WH-SGI-V-07168	0.77	2.27	GCA_001449515.1
			WH-SGI-V-07169	1.875	3.287	GCA_001449545.1
			WH-SGI-V-07170	1.515	1.553	GCA_001450505.1
			WH-SGI-V-07171	0.149	1.929	GCA_001449555.1
			WH-SGI-V-07172	0.619	2.645	GCA_001449585.1
			WH-SGI-V-07173	1.15	2.403	GCA_001450525.1
			WH-SGI-V-07174	0.512	1.987	GCA_001449605.1
			WH-SGI-V-07175	0.666	3.31	GCA_001449625.1
			WH-SGI-V-07176	0.989	1.215	GCA_001450545.1
			WH-SGI-V-07177	1.005	0.632	GCA_001449645.1
			WH-SGI-V-07178	1.103	2.029	GCA_001449765.1
			WH-SGI-V-07179	1.685	0.776	GCA_001450555.1
			WH-SGI-V-07180	0.815	1.535	GCA_001449675.1
			WH-SGI-V-07221	0.499	1.234	GCA_001449705.1
			WH-SGI-V-07181	1.59	1.498	GCA_001449725.1
			WH-SGI-V-07182	2.901	2.598	GCA_001450585.1
			WH-SGI-V-07183	0.319	2.978	GCA_001450605.1
			WH-SGI-V-07184	1.126	3.032	GCA_001449735.1
			WH-SGI-V-07185	0.185	1.772	GCA_001450625.1
			WH-SGI-V-07186	0.629	0.234	GCA_001449765.1
			WH-SGI-V-07187	0.548	0.313	GCA_001449785.1
			WH-SGI-V-07188	2.035	2.019	GCA_001449805.1
			WH-SGI-V-07222	0.885	3.16	GCA_001450635.1
			WH-SGI-V-07223	0.385	3.317	GCA_001449825.1
			WH-SGI-V-07224	0.481	1.789	GCA_001450665.1
			WH-SGI-V-07225	3.355	1.746	GCA_001449835.1
			WH-SGI-V-07226	0.306	0.127	GCA_001449865.1
			WH-SGI-V-07227	0.4	1.124	GCA_001450675.1
			WH-SGI-V-07228	0.807	1.934	GCA_001449885.1
			WH-SGI-V-07229	1.438	2.389	GCA_001449905.1
			WH-SGI-V-07231	1.857	3.369	GCA_001449925.1
			WH-SGI-V-07232	1.609	3.121	GCA_001449935.1
			WH-SGI-V-07233	1.071	0.363	GCA_001450715.1
			WH-SGI-V-07234	3.231	2.694	GCA_001449965.1
			WH-SGI-V-07235	1.279	2.731	GCA_001449985.1
			WH-SGI-V-07236	1.739	1.905	GCA_001450745.1
			WH-SGI-V-07237	3.073	2.29	GCA_001450005.1
			WH-SGI-V-07238	2.644	2.914	GCA_001450015.1
			WH-SGI-V-07239	0.135	0.403	GCA_001450755.1
			WH-SGI-V-07240	0.176	0.63	GCA_001450045.1
			WH-SGI-V-07241	0.229	0.484	GCA_001450935.1
			WH-SGI-V-07242	0.736	0.89	GCA_001450785.1
			WH-SGI-V-07243	1.348	1.172	GCA_001450065.1
			WH-SGI-V-07244	2.161	3.018	GCA_001450085.1
			WH-SGI-V-07245	0.759	0.76	GCA_001450095.1
			WH-SGI-V-07246	3.024	2.85	GCA_001450795.1
			WH-SGI-V-07368	1.924	2.279	GCA_001450115.1
			WH-SGI-V-07369	1.395	0.086	GCA_001450145.1
			WH-SGI-V-07370	3.302	3.271	GCA_001450165.1
			WH-SGI-V-07371	2.773	1.815	GCA_001450825.1
			WH-SGI-V-07372	0.666	0.926	GCA_001450185.1
			WH-SGI-V-07373	1.156	1.758	GCA_001450835.1
			WH-SGI-V-07374	0.617	2.379	GCA_001450195.1
			WH-SGI-V-07375	0.475	1.416	GCA_001450225.1
			WH-SGI-V-07376	0.568	1.907	GCA_001450865.1
			WH-SGI-V-07377	0.289	0.929	GCA_001450245.1
			WH-SGI-V-07378	0.56	1.438	GCA_001450265.1
			WH-SGI-V-07379	0.514	1.102	GCA_001450275.1
			WH-SGI-V-07380	3.398	1.634	GCA_001450305.1
			WH-SGI-V-07381	3.365	2.039	GCA_001450925.1
			WH-SGI-V-07382	0.794	2.22	GCA_001450875.1
			WH-SGI-V-07383	0.499	0.79	GCA_001451245.1
			WH-SGI-V-07384	0.591	0.964	GCA_001450915.1
			WH-SGI-V-07385	0.366	2.006	GCA_001450905.1
			WH-SGI-V-07386	0.774	3.322	GCA_001450985.1
			WH-SGI-V-07387	1.884	2.678	GCA_001450995.1
			WH-SGI-V-07388	2.728	3.099	GCA_001451255.1
			WH-SGI-V-07389	0.649	1.289	GCA_001451015.1
			WH-SGI-V-07390	0.5	1.354	GCA_001451025.1
			WH-SGI-V-07391	0.33	1.575	GCA_001451075.1
			WH-SGI-V-07392	2.066	3.401	GCA_001451065.1
			WH-SGI-V-07404	3.262	0.837	GCA_001451265.1
			WH-SGI-V-07405	0.622	1.56	GCA_001451105.1
			WH-SGI-V-07406	0.532	2.721	GCA_001451125.1
			WH-SGI-V-07407	0.343	0.109	GCA_001451145.1
			WH-SGI-V-07408	1.561	2.298	GCA_001451295.1
			WH-SGI-V-07409	0.591	1.528	GCA_001451335.1
			WH-SGI-V-07410	2.01	1.499	GCA_001451325.1
			WH-SGI-V-07411	0.383	1.968	GCA_001451165.1
			WH-SGI-V-07412	1.673	1.485	GCA_001451355.1
			WH-SGI-V-07413	0.534	2.009	GCA_001451175.1
			WH-SGI-V-07414	2.245	3.443	GCA_001451205.1
			WH-SGI-V-07415	2.656	3.238	GCA_001451225.1
			WH-SGI-V-07416	0.962	0.926	GCA_001453095.1
			WH-SGI-V-07417	1.827	2.346	GCA_001451375.1
			WH-SGI-V-07418	0.407	0.934	GCA_001453125.1
			WH-SGI-V-07419	0.697	2.487	GCA_001451405.1
			WH-SGI-V-07420	1.151	1.451	GCA_001453145.1
			WH-SGI-V-07421	1.286	3.397	GCA_001451425.1
			WH-SGI-V-07422	0.86	1.84	GCA_001451445.1
			WH-SGI-V-07423	0.131	3.186	GCA_001453155.1
			WH-SGI-V-07424	0.032	3.021	GCA_001451455.1
			WH-SGI-V-07425	0.377	0.765	GCA_001451485.1
			WH-SGI-V-07426	3.145	1.418	GCA_001451505.1
			WH-SGI-V-07427	1.748	3.433	GCA_001451535.1
			WH-SGI-V-07428	3.18	2.554	GCA_001451525.1
			WH-SGI-V-07484	1.673	3.4	GCA_001451565.1
			WH-SGI-V-07485	1.293	1.255	GCA_001451575.1
			WH-SGI-V-07486	2.578	1.402	GCA_001451605.1
			WH-SGI-V-07487	1.487	2.886	GCA_001451625.1
			WH-SGI-V-07488	3.35	1.461	GCA_001451645.1
			WH-SGI-V-07489	3.135	3.403	GCA_001451655.1
			WH-SGI-V-07490	3.378	3.155	GCA_001451685.1
			WH-SGI-V-07491	3.311	0.495	GCA_001451705.1
			WH-SGI-V-07492	1.27	3.142	GCA_001453185.1
			WH-SGI-V-07493	2.408	3.141	GCA_001451725.1
			WH-SGI-V-07494	2.204	3.407	GCA_001451745.1
			WH-SGI-V-07495	1.852	2.242	GCA_001451755.1
			WH-SGI-V-07496	0.609	0.075	GCA_001451785.1
			WH-SGI-V-07497	0.15	1.005	GCA_001451805.1
			WH-SGI-V-07498	2.21	1.833	GCA_001451815.1
			WH-SGI-V-07499	1.744	3.234	GCA_001453205.1
			WH-SGI-V-07500	0.087	0.098	GCA_001451835.1
			WH-SGI-V-07501	0.567	0.148	GCA_001453225.1
			WH-SGI-V-07502	0.376	3.411	GCA_001451865.1
			WH-SGI-V-07503	0.653	0.581	GCA_001453235.1
			WH-SGI-V-07504	0.954	2.66	GCA_001451885.1
			WH-SGI-V-07505	1.614	3.174	GCA_001451895.1
			WH-SGI-V-07506	0.766	1.294	GCA_001453265.1
			WH-SGI-V-07507	3.376	2.414	GCA_001453285.1
			WH-SGI-V-07508	3.376	0.261	GCA_001451905.1
			WH-SGI-V-07618	1.216	0.106	GCA_001451945.1
			WH-SGI-V-07619	0.249	1.711	GCA_001451965.1
			WH-SGI-V-07620	1.51	1.961	GCA_001453305.1
			WH-SGI-V-07621	0.624	3.422	GCA_001451975.1
			WH-SGI-V-07622	2.557	0.033	GCA_001451985.1
			WH-SGI-V-07623	0.385	1.923	GCA_001453315.1
			WH-SGI-V-07624	0.32	0.056	GCA_001453345.1
			WH-SGI-V-07625	0.265	3.291	GCA_001453365.1
			WH-SGI-V-07626	3.249	0.158	GCA_001452025.1
			WH-SGI-V-07627	0.577	2.685	GCA_001452045.1
			WH-SGI-V-07628	0.714	0.177	GCA_001452055.1
			WH-SGI-V-07629	2.829	1.057	GCA_001453385.1
			WH-SGI-V-07630	0.533	2.994	GCA_001452075.1
			WH-SGI-V-07631	0.479	0.547	GCA_001453405.1
			WH-SGI-V-07632	3.463	2.712	GCA_001453415.1
			WH-SGI-V-07633	0.79	3.384	GCA_001452105.1
			WH-SGI-V-07634	0.928	3.275	GCA_001452125.1
			WH-SGI-V-07635	3.042	2.381	GCA_001452135.1
			WH-SGI-V-07636	1.597	3.179	GCA_001452155.1
			WH-SGI-V-07637	1.756	1.438	GCA_001452185.1
			WH-SGI-V-07638	2.9	0.914	GCA_001453435.1
			WH-SGI-V-07639	0.024	0.093	GCA_001453465.1
			WH-SGI-V-07640	0.175	1.824	GCA_001452205.1
			WH-SGI-V-07641	0.222	0.566	GCA_001452215.1
			WH-SGI-V-07642	0.384	0.61	GCA_001452235.1
			WH-SGI-V-07643	1.701	0.095	GCA_001452255.1
			WH-SGI-V-07644	0.274	2.755	GCA_001452285.1
			WH-SGI-V-07645	1.257	2.237	GCA_001452305.1
			WH-SGI-V-07646	1.749	3.278	GCA_001453485.1
			WH-SGI-V-07647	1.46	1.762	GCA_001452325.1
			WH-SGI-V-07648	0.376	1.111	GCA_001453495.1
			WH-SGI-V-07649	1.248	0.085	GCA_001452335.1
			WH-SGI-V-07650	1.213	0.076	GCA_001453515.1
			WH-SGI-V-07651	0.183	1.335	GCA_001452365.1
			WH-SGI-V-07652	0.266	0.081	GCA_001452385.1
			WH-SGI-V-07678	0.451	1.99	GCA_001453545.1
			WH-SGI-V-07679	0.122	0.25	GCA_001453565.1
			WH-SGI-V-07680	3.398	0.25	GCA_001452405.1
			WH-SGI-V-07681	1.201	1.358	GCA_001452415.1
			WH-SGI-V-07682	3.371	3.361	GCA_001453585.1
			WH-SGI-V-07683	1.257	3.342	GCA_001453595.1
			WH-SGI-V-07684	3.131	2.885	GCA_001453615.1
			WH-SGI-V-07685	1.2	3.361	GCA_001452445.1
			WH-SGI-V-07686	1.419	3.288	GCA_001453645.1
			WH-SGI-V-07687	0.442	1.623	GCA_001452465.1
			WH-SGI-V-07688	0.251	1.918	GCA_001452485.1
			WH-SGI-V-07689	0.812	1.77	GCA_001452495.1
			WH-SGI-V-07690	1.908	3.228	GCA_001452525.1
			WH-SGI-V-07691	0.862	2.943	GCA_001453665.1
			WH-SGI-V-07692	2.981	2.938	GCA_001452545.1
			WH-SGI-V-07693	0.081	3.309	GCA_001452565.1
			WH-SGI-V-07694	0.369	0.42	GCA_001452575.1
			WH-SGI-V-07695	0.149	2.025	GCA_001453675.1
			WH-SGI-V-07696	0.359	0.711	GCA_001453705.1
			WH-SGI-V-07697	3.386	1.509	GCA_001452605.1
			WH-SGI-V-07698	3.433	3.242	GCA_001453725.1
			WH-SGI-V-07699	1.018	3.062	GCA_001452615.1
			WH-SGI-V-07700	0.718	3.133	GCA_001452645.1
			WH-SGI-V-07701	0.628	3.192	GCA_001453735.1
			WH-SGI-V-07702	2.266	0.131	GCA_001452665.1
			WH-SGI-V-07703	0.254	1.73	GCA_001452675.1
			WH-SGI-V-07704	1.114	3.319	GCA_001452685.1
			WH-SGI-V-07705	1.293	2.816	GCA_001453755.1
			WH-SGI-V-07706	0.991	0.239	GCA_001452725.1
			WH-SGI-V-07707	2.155	3.362	GCA_001452745.1
			WH-SGI-V-07708	1.832	2.8	GCA_001454585.1
			WH-SGI-V-07709	2.574	3.398	GCA_001452755.1
			WH-SGI-V-07710	0.129	0.172	GCA_001453775.1
			WH-SGI-V-07711	1.616	1.354	GCA_001452765.1
			WH-SGI-V-07299	2.359	0.052	GCA_001453805.1
			WH-SGI-V-07247	2.355	1.619	GCA_001452805.1
			WH-SGI-V-07248	0.917	2.971	GCA_001452825.1
			WH-SGI-V-07249	0.525	0.517	GCA_001452835.1
			WH-SGI-V-07250	0.386	3.344	GCA_001452865.1
			WH-SGI-V-07251	0.385	3.344	GCA_001453825.1
			WH-SGI-V-07252	2.634	2.245	GCA_001452885.1
			WH-SGI-V-07253	0.076	3.263	GCA_001452905.1
			WH-SGI-V-07254	0.415	3.227	GCA_001452915.1
			WH-SGI-V-07255	1.06	1.571	GCA_001453835.1
			WH-SGI-V-07256	0.473	0.34	GCA_001453855.1
			WH-SGI-V-07258	0.729	3.421	GCA_001452935.1
			WH-SGI-V-07259	0.454	2.165	GCA_001453885.1
			WH-SGI-V-07260	0.284	0.772	GCA_001452965.1
			WH-SGI-V-07261	0.604	0.03	GCA_001452985.1
			WH-SGI-V-07263	0.28	3.025	GCA_001453015.1
			WH-SGI-V-07265	1.924	2.824	GCA_001452995.1
			WH-SGI-V-07266	1.176	0.868	GCA_001453985.1
			WH-SGI-V-07267	1.391	3.367	GCA_001453025.1
			WH-SGI-V-07268	1.571	3.221	GCA_001454595.1
			WH-SGI-V-07272	1.136	2.761	GCA_001453065.1
			WH-SGI-V-07273	1.082	3.029	GCA_001453905.1
			WH-SGI-V-07276	1.044	2.911	GCA_001454045.1
			WH-SGI-V-07277	0.166	3.171	GCA_001454065.1
			WH-SGI-V-07278	0.073	1.136	GCA_001453915.1
			WH-SGI-V-07279	0.226	3.255	GCA_001453945.1
			WH-SGI-V-07280	0.13	3.255	GCA_001454625.1
			WH-SGI-V-07281	0.711	0.298	GCA_001454645.1
			WH-SGI-V-07282	0.689	0.019	GCA_001453075.1
			WH-SGI-V-07283	0.477	0.092	GCA_001454665.1
			WH-SGI-V-07284	0.774	2.188	GCA_001454085.1
			WH-SGI-V-07286	0.432	0.615	GCA_001454095.1
			WH-SGI-V-07287	0.498	2.498	GCA_001454675.1
			WH-SGI-V-07290	0.041	2.911	GCA_001454125.1
			WH-SGI-V-07291	0.889	3.417	GCA_001454145.1
			WH-SGI-V-07293	2.052	3.417	GCA_001454165.1
			WH-SGI-V-07294	0.628	3.031	GCA_001454175.1
			WH-SGI-V-07295	0.225	1.261	GCA_001454205.1
			WH-SGI-V-07296	0.211	3.135	GCA_001454225.1
			WH-SGI-V-07297	0.264	3.471	GCA_001454235.1
			WH-SGI-V-07300	1.352	3.443	GCA_001454265.1
			WH-SGI-V-07302	1.325	3.331	GCA_001454725.1
			WH-SGI-V-07305	0.907	2.929	GCA_001454725.1
			WH-SGI-V-07306	0.96	3.484	GCA_001454285.1
			WH-SGI-V-07309	0.746	3.492	GCA_001454305.1
			WH-SGI-V-07310	1.874	1.912	GCA_001454325.1
			WH-SGI-V-07311	1.297	3.419	GCA_001454745.1
			WH-SGI-V-07312	1.743	1.804	GCA_001454335.1
			WH-SGI-V-07313	0.526	1.246	GCA_001454365.1
			WH-SGI-V-07314	1.816	1.642	GCA_001454385.1
			WH-SGI-V-07316	1.755	2.765	GCA_001454395.1
			WH-SGI-V-07317	1.281	2.08	GCA_001454415.1
			WH-SGI-V-07318	3.2	3.411	GCA_001454755.1
			WH-SGI-V-07320	1.924	3.422	GCA_001454785.1
			WH-SGI-V-07322	0.75	2.716	GCA_001454445.1
			WH-SGI-V-07323	1.472	3.409	GCA_001454465.1
			WH-SGI-V-07324	2.201	3.303	GCA_001454485.1
			WH-SGI-V-07325	0.392	0.971	GCA_001454495.1
			WH-SGI-V-07326	0.349	2.576	GCA_001454805.1
			WH-SGI-V-07327	0.126	1.466	GCA_001454825.1
			WH-SGI-V-07328	0.542	2.846	GCA_001454515.1
			WH-SGI-V-07329	1.487	3.056	GCA_001454545.1
			WH-SGI-V-07330	3.411	3.298	GCA_001454565.1

## Sheet: Suppl. Table 2
		Suppl. Table 2 - isolates used in stainless steel biofilm analyses
		Names of isolates used in genomic analysis	Accession ID	Sequence type	Biofilm phenotype assessed?	Average OD for biofilm on stainless steel	Standard error OD for biofilm on stainless steel
		WH_SGI_V_07168	GCA_001449515.1	111	Yes	0.956583	0.146523
		WH_SGI_V_07171	GCA_001449555.1	111	Yes	1.98767	0.330048
		WH_SGI_V_07173	GCA_001450525.1	111	Yes	1.395	0.373979
		WH_SGI_V_07174	GCA_001449605.1	111	Yes	0.530467	0.102642
		WH_SGI_V_07175	GCA_001449625.1	111	Yes	0.74325	0.213852
		WH_SGI_V_07180	GCA_001449675.1	111	Yes	0.414667	0.0975404
		WH_SGI_V_07221	GCA_001449705.1	111	Yes	0.4235	0.102355
		WH_SGI_V_07256	GCA_001453855.1	111	Yes	0.7285	0.0470186
		WH_SGI_V_07259	GCA_001453885.1	111	Yes	0.5175	0.0953463
		WH_SGI_V_07296	GCA_001454225.1	111	Yes	0.196	0.0279494
		WH_SGI_V_07320	GCA_001454785.1	111	Yes	0.2445	0.0557562
		WH_SGI_V_07322	GCA_001454445.1	111	No
		WH_SGI_V_07323	GCA_001454465.1	111	Yes	0.2305	0.0651172
		WH_SGI_V_07324	GCA_001454485.1	111	Yes	0.21	0.0467974
		WH_SGI_V_07325	GCA_001454495.1	111	No
		WH_SGI_V_07326	GCA_001454805.1	111	Yes	0.24775	0.0335469
		WH_SGI_V_07327	GCA_001454825.1	111	Yes	0.154	0.036428
		WH_SGI_V_07329	GCA_001454545.1	111	Yes	0.14325	0.00372771
		WH_SGI_V_07330	GCA_001454565.1	111	Yes	0.241	0.00267706
		WH_SGI_V_07328	GCA_001454515.1	111	No
		WH_SGI_V_07391	GCA_001451075.1	111	Yes	0.446333	0.139621
		WH_SGI_V_07392	GCA_001451065.1	111	Yes	0.311333	0.0374941
		WH_SGI_V_07497	GCA_001451805.1	111	Yes	0.333467	0.0456942
		WH_SGI_V_07651	GCA_001452365.1	111	Yes	1.55058	0.347962
		WH_SGI_V_07652	GCA_001452385.1	111	Yes	0.320733	0.0599153
		WH_SGI_V_07688	GCA_001452485.1	111	Yes	0.686167	0.115699
		WH_SGI_V_07700	GCA_001452645.1	111	Yes	0.461467	0.0390817
		WH_SGI_V_07702	GCA_001452665.1	111	Yes	0.86075	0.0719881
		1709_12	GCA_001756495.1	111	No
		558344	GCA_001909605.1	111	No
		AATYA	GCA_001469695.1	111	No
		AZPAE13756	GCA_000797395.1	111	No
		AZPAE14381	GCA_000795945.1	111	No
		AZPAE14415	GCA_000796205.1	111	No
		AZPAE14453	GCA_000796345.1	111	No
		AZPAE14463	GCA_000796365.1	111	No
		AZPAE14535	GCA_000796475.1	111	No
		AZPAE14554	GCA_000794405.1	111	No
		AZPAE14707	GCA_000796025.1	111	No
		AZPAE14713	GCA_000797085.1	111	No
		AZPAE14714	GCA_000796845.1	111	No
		AZPAE14724	GCA_000795865.1	111	No
		AZPAE14727	GCA_000794885.1	111	No
		AZPAE14728	GCA_000794905.1	111	No
		AZPAE14729	GCA_000794925.1	111	No
		AZPAE14846	GCA_000789745.1	111	No
		AZPAE14886	GCA_000790705.1	111	No
		AZPAE14933	GCA_000794085.1	111	No
		AZPAE14983	GCA_000792305.1	111	No
		AZPAE15002	GCA_000792705.1	111	No
		AZPAE15007	GCA_000792805.1	111	No
		AZPAE15009	GCA_000792845.1	111	No
		AZPAE15066	GCA_000793395.1	111	No
		Br993	GCA_001756405.1	111	No
		Carb01_63	GCA_000981825.1	111	No
		E10_London_26_VIM_2_06_13	GCA_001181705.1	111	No
		E11_London_26_VIM_2_06_13	GCA_001181725.1	111	No
		E12_London_26_VIM_2_06_13	GCA_001181745.1	111	No
		E13_London_26_VIM_2_06_13	GCA_001181765.1	111	No
		E14_London_26_VIM_2_06_13	GCA_001181785.1	111	No
		E16_London_17_VIM_2_04_14	GCA_001182025.1	111	No
		E1_London_17_VIM_2_02_09	GCA_001180445.1	111	No
		E2_London_17_VIM_2_02_09	GCA_001180465.1	111	No
		E3_London_17_VIM_2_03_09	GCA_001180485.1	111	No
		E4_London_17_VIM_2_03_09	GCA_001180505.1	111	No
		E5_London_17_VIM_2_12_12	GCA_001181325.1	111	No
		E6_London_17_VIM_2_12_12	GCA_001181345.1	111	No
		E7_London_9_VIM_2_02_13	GCA_001181505.1	111	No
		E8_London_17_VIM_2_04_13	GCA_001181625.1	111	No
		E9_London_17_VIM_2_04_13	GCA_001181645.1	111	No
		FFUP_PS_105	GCA_002188565.1	111	No
		FRD1	GCA_000950725.1	111	No
		HPA17	GCA_001756515.1	111	No
		HPA4	GCA_001756585.1	111	No
		HSV3483	GCA_002188625.1	111	No
		MH38	GCA_000689435.1	111	No
		P10_London_6_VIM_2_09_09	GCA_001180605.1	111	No
		P11_London_17_VIM_2_10_09	GCA_001180625.1	111	No
		P12_London_17_VIM_2_11_09	GCA_001180645.1	111	No
		P13_London_14_VIM_2_12_09	GCA_001180665.1	111	No
		P14_London_17_VIM_2_01_10	GCA_001180685.1	111	No
		P15_London_17_02_10	GCA_001180705.1	111	No
		P16_London_17_VIM_2_02_10	GCA_001180725.1	111	No
		P17_North_West_14_VIM_2_03_10	GCA_001180745.1	111	No
		P18_London_17_VIM_2_04_10	GCA_001180765.1	111	No
		P19_London_7_VIM_2_05_10	GCA_001180785.1	111	No
		P1_London_28_IMP_1_04_05	GCA_001180345.1	111	No
		P20_London_17_VIM_2_05_10	GCA_001180805.1	111	No
		P21_London_17_VIM_2_06_10	GCA_001180825.1	111	No
		P22_London_17_VIM_2_06_10	GCA_001180845.1	111	No
		P23_East_of_England_6_IMP_13_07_10	GCA_001180865.1	111	No
		P24_London_17_VIM_2_08_10	GCA_001180885.1	111	No
		P25_London_12_VIM_2_08_10	GCA_001180905.1	111	No
		P26_Wales_1_VIM_2_11_10	GCA_001180925.1	111	No
		P27_Wales_1_VIM_2_02_11	GCA_001180945.1	111	No
		P28_London_17_02_11	GCA_001180965.1	111	No
		P29_London_12_VIM_2_05_11	GCA_001180985.1	111	No
		P2_London_28_IMP_1_06_05	GCA_001180365.1	111	No
		P30_South_East_2_VIM_2_10_11	GCA_001181005.1	111	No
		P31_Wales_1_VIM_2_11_11	GCA_001181025.1	111	No
		P32_London_17_VIM_2_10_11	GCA_001181045.1	111	No
		P33_London_28_VIM_2_02_12	GCA_001181065.1	111	No
		P34_London_28_VIM_2_02_12	GCA_001181085.1	111	No
		P35_London_26_VIM_2_05_12	GCA_001181105.1	111	No
		P36_West_Midlands_5_VIM_2_06_12	GCA_001181125.1	111	No
		P37_London_28_VIM_2_07_12	GCA_001181145.1	111	No
		P38_London_12_VIM_2_08_12	GCA_001181165.1	111	No
		P39_London_29_08_12	GCA_001181185.1	111	No
		P3_North_West_16_VIM_2_07_06	GCA_001180385.1	111	No
		P40_Scotland_4_VIM_2_09_12	GCA_001181205.1	111	No
		P41_London_28_09_12	GCA_001181225.1	111	No
		P42_1_London_26_VIM_2_10_12	GCA_001181245.1	111	No
		P42_2_London_28_VIM_2_11_12	GCA_001181285.1	111	No
		P43_1_London_9_VIM_2_11_12	GCA_001181265.1	111	No
		P43_2_London_9_VIM_2_11_12	GCA_001181465.1	111	No
		P44_Wales_1_VIM_2_11_12	GCA_001182945.1	111	No
		P45_London_17_VIM_2_12_12	GCA_001181305.1	111	No
		P46_South_East_6_12_12	GCA_001181365.1	111	No
		P47_London_12_VIM_2_12_12	GCA_001181385.1	111	No
		P48_London_17_VIM_2_01_13	GCA_001181405.1	111	No
		P49_London_7_VIM_2_01_13	GCA_001181425.1	111	No
		P4_London_1_VIM_2_10_07	GCA_001180405.1	111	No
		P50_London_9_VIM_2_01_13	GCA_001181445.1	111	No
		P51_1_London_9_VIM_2_02_13	GCA_001181485.1	111	No
		P51_2_London_11_VIM_2_02_13	GCA_001181545.1	111	No
		P52_1_London_26_VIM_2_02_13	GCA_001181525.1	111	No
		P52_2_London_26_VIM_2_02_13	GCA_001181565.1	111	No
		P53_London_9_VIM_2_02_13	GCA_001181585.1	111	No
		P54_1_London_24_VIM_2_04_13	GCA_001181605.1	111	No
		P54_2_London_24_VIM_2_04_13	GCA_001181665.1	111	No
		P55_London_26_VIM_2_05_13	GCA_001181685.1	111	No
		P56_London_12_VIM_2_07_13	GCA_001181805.1	111	No
		P57_South_East_3_VIM_2_09_13	GCA_001181845.1	111	No
		P58_London_29_09_13	GCA_001181865.1	111	No
		P59_Wales_1_VIM_2_09_13	GCA_001181885.1	111	No
		P5_London_26_VIM_2_01_09	GCA_001180425.1	111	No
		P60_London_6_VIM_2_11_13	GCA_001181905.1	111	No
		P61_London_9_VIM_2_11_13	GCA_001181925.1	111	No
		P62_London_9_VIM_2_01_14	GCA_001181965.1	111	No
		P63_London_25_VIM_2_03_14	GCA_001182005.1	111	No
		P64_East_of_England_6_01_14	GCA_001181945.1	111	No
		P6_East_of_England_6_IMP_1_03_09	GCA_001180525.1	111	No
		P7_London_17_VIM_2_06_09	GCA_001180545.1	111	No
		P8_1_South_East_10_VIM_2_07_09	GCA_001180565.1	111	No
		P8_2_London_17_VIM_2_07_13	GCA_001181825.1	111	No
		P9_East_of_England_6_IMP_13_08_09	GCA_001180585.1	111	No
		RIVM-EMC2982	GCA_002085605.1	111	No
		S558_C10_BS	GCA_002136005.1	111	No
		S611_C13_RS	GCA_002135955.1	111	No
		S61_C01_BS	GCA_002136275.1	111	No
		S708_C14_RS	GCA_002136415.1	111	No
		S742_C15_BS	GCA_002135805.1	111	No
		S749_C15_RS	GCA_002135755.1	111	No
		WH-SGI-V-07170	GCA_001450505.1	235	Yes	1.03325	0.376095
		WH-SGI-V-07176	GCA_001450545.1	235	Yes	0.13075	0.076429
		WH-SGI-V-07177	GCA_001449645.1	235	Yes	0.48175	0.431179
		WH-SGI-V-07186	GCA_001449765.1	235	Yes	0.02225	0.00829031
		WH-SGI-V-07247	GCA_001452805.1	235	No
		WH-SGI-V-07268	GCA_001454595.1	235	No
		WH-SGI-V-07276	GCA_001454045.1	235	No
		WH-SGI-V-07309	GCA_001454305.1	235	No
		WH-SGI-V-07387	GCA_001450995.1	235	Yes	1.027	0.241359
		WH-SGI-V-07406	GCA_001451125.1	235	Yes	0.653	0.28492
		WH-SGI-V-07425	GCA_001451485.1	235	Yes	2.60275	0.134819
		WH-SGI-V-07496	GCA_001451785.1	235	Yes	0.72325	0.100994
		WH-SGI-V-07498	GCA_001451815.1	235	Yes	1.00275	0.108114
		WH-SGI-V-07504	GCA_001451885.1	235	Yes	0.81225	0.0644973
		WH-SGI-V-07622	GCA_001451985.1	235	Yes	1.3245	0.214148
		WH-SGI-V-07624	GCA_001453345.1	235	Yes	0.26675	0.0168542
		WH-SGI-V-07625	GCA_001453365.1	235	Yes	0.38075	0.0378007
		WH-SGI-V-07626	GCA_001452025.1	235	Yes	2.5305	0.413153
		WH-SGI-V-07627	GCA_001452045.1	235	Yes	0.294	0.0251628
		WH-SGI-V-07628	GCA_001452055.1	235	Yes	0.57975	0.0934607
		WH-SGI-V-07644	GCA_001452285.1	235	Yes	0.34	0.011
		WH-SGI-V-07645	GCA_001452305.1	235	Yes	1.68925	0.391884
		WH-SGI-V-07646	GCA_001453485.1	235	Yes	0.322	0.0058023
		WH-SGI-V-07679	GCA_001453565.1	235	Yes	0.237	0.00669577
		WH-SGI-V-07683	GCA_001453595.1	235	Yes	0.73425	0.0958813
		WH-SGI-V-07694	GCA_001452575.1	235	Yes	0.56625	0.119133
		WH-SGI-V-07703	GCA_001452675.1	235	Yes	0.32225	0.0427149
		200	GCA_900145405.1	235
		2357	GCA_002193975.1	235
		323	GCA_900146525.1	235
		39016	GCA_000148745.1	235
		511653	GCA_001909825.1	235
		6077	GCA_000481745.1	235
		608748_668748	GCA_001910045.1	235
		AR_0092	GCA_001874805.1	235
		AR_0100	GCA_001874975.1	235
		AR_0105	GCA_001874995.1	235
		ASM108664	GCA_001086645.1	235
		ASM108665	GCA_001086655.1	235
		ASM108673	GCA_001086735.1	235
		ASM108674	GCA_001086745.1	235
		ASM108680	GCA_001086805.1	235
		AZPAE13879	GCA_000795685.1	235
		AZPAE14353	GCA_000795765.1	235
		AZPAE14422	GCA_000796225.1	235
		AZPAE14690	GCA_000794555.1	235
		AZPAE14710	GCA_000795605.1	235
		AZPAE14719	GCA_000797025.1	235
		AZPAE14720	GCA_000795955.1	235
		AZPAE14721	GCA_000796245.1	235
		AZPAE14723	GCA_000795705.1	235
		AZPAE14730	GCA_000794945.1	235
		AZPAE14732	GCA_000794985.1	235
		AZPAE14830	GCA_000794185.1	235
		AZPAE14842	GCA_000789625.1	235
		AZPAE14843	GCA_000789635.1	235
		AZPAE14874	GCA_000790405.1	235
		AZPAE14887	GCA_000790725.1	235
		AZPAE14912	GCA_000794055.1	235
		AZPAE14968	GCA_000791915.1	235
		AZPAE14979	GCA_000792205.1	235
		AZPAE15000	GCA_000792665.1	235
		AZPAE15003	GCA_000792725.1	235
		AZPAE15006	GCA_000792785.1	235
		AZPAE15015	GCA_000792975.1	235
		AZPAE15058	GCA_000793225.1	235
		AZPAE15063	GCA_000793315.1	235
		BL14	GCA_000480865.1	235
		BL17	GCA_000480805.1	235
		BWH030	GCA_000629125.1	235
		BWHPSA006	GCA_000481585.1	235
		CCF_795	GCA_001910285.1	235
		CCF_834	GCA_001910055.1	235
		CLB24983	GCA_001909675.1	235
		E6130952	GCA_002085755.1	235
		E_2_UoS	GCA_000412395.1	235
		FFUP_PS_690	GCA_002189115.1	235
		FFUP_PS_CB5	GCA_002188505.1	235
		JJ692	GCA_003834545.1	235
		Kasamber	GCA_002003595.1	235
		MH27	GCA_000513235.1	235
		NCGM_1900	GCA_000829275.1	235
		Pa538	GCA_001680745.1	235
		PAC17	GCA_002002765.1	235
		PAS10	GCA_002201325.1	235
		PAS5	GCA_002201225.1	235
		PAS6	GCA_002201255.1	235
		PAS9	GCA_002201375.1	235
		RNS_PA1	GCA_001623945.1	235
		RNS_PA46	GCA_001623955.1	235
		RNS_PAE05	GCA_001623985.1	235
		S122_C02_RS	GCA_002136245.1	235
		S39_C01_BS	GCA_002136285.1	235
		S402_C09_RS	GCA_002136435.1	235
		S461_C10_RS	GCA_002136455.1	235
		S49_C01_BS	GCA_002136525.1	235
		S823_C17_RS	GCA_002135635.1	235
		S854_C18_BS	GCA_002136335.1	235
		TRN6592	GCA_001921005.1	235
		TRN6594	GCA_001921015.1	235
		TRN6598	GCA_001921025.1	235
		TRN6601	GCA_001921065.1	235
		TRN6633	GCA_001921105.1	235
		TRN6635	GCA_001921125.1	235
		TRN6637	GCA_001921165.1	235
		U2504	GCA_003834495.1	235
		W15Dec3	GCA_001756435.1	235

## Sheet: Suppl. Table 3
Suppl. Table 3. Scoary output file showing genes / COGs significantly associated with greater biofilm production at 22°C than 37°C.
Rank	Gene	Non-unique Gene name	Annotation	Number_pos_present_in	Number_neg_present_in	Number_pos_not_present_in	Number_neg_not_present_in	Sensitivity	Specificity	Odds_ratio	Naive_p	Bonferroni_p	Benjamini_H_p	Max_Pairwise_comparisons	Max_supporting_pairs	Max_opposing_pairs	Best_pairwise_comp_p	Worst_pairwise_comp_p
1	group_8321		hypothetical protein	62	6	131	81	32.1244	93.1034	6.38931	1.84e-06	0.0588619	0.0177716	15	13	4	0.00738525	0.118469
2	group_15072		hypothetical protein	71	9	122	78	36.7876	89.6552	5.04372	3.27e-06	0.104811	0.0177716	20	18	5	0.000402451	0.0413895
3	group_1519		hypothetical protein	70	9	123	78	36.2694	89.6552	4.93225	3.46e-06	0.110789	0.0177716	21	19	5	0.000221252	0.0266037
4	group_15041		hypothetical protein	67	8	126	79	34.715	90.8046	5.25099	4.17e-06	0.133818	0.0177716	16	14	4	0.00418091	0.0768127
5	group_11043	arsC_1	Arsenate reductase	69	9	124	78	35.7513	89.6552	4.82258	5.87e-06	0.188127	0.0177716	16	15	5	0.000518799	0.210114
6	acr3		Arsenical-resistance protein Acr3	69	9	124	78	35.7513	89.6552	4.82258	5.87e-06	0.188127	0.0177716	16	15	5	0.000518799	0.210114
7	arsC_2		Arsenate reductase	69	9	124	78	35.7513	89.6552	4.82258	5.87e-06	0.188127	0.0177716	16	15	5	0.000518799	0.210114
8	group_11046		hypothetical protein	69	9	124	78	35.7513	89.6552	4.82258	5.87e-06	0.188127	0.0177716	16	15	5	0.000518799	0.210114
9	group_2314		hypothetical protein	69	9	124	78	35.7513	89.6552	4.82258	5.87e-06	0.188127	0.0177716	20	18	5	0.000402451	0.0413895
10	arsH_1		NADPH-dependent FMN reductase ArsH	69	9	124	78	35.7513	89.6552	4.82258	5.87e-06	0.188127	0.0177716	16	15	5	0.000518799	0.210114
11	ydfG		NADP-dependent 3-hydroxy acid dehydrogenase YdfG	65	8	128	79	33.6788	90.8046	5.01465	7.48e-06	0.239862	0.0177716	15	13	4	0.00738525	0.118469
12	group_15062		HTH-type transcriptional repressor	65	8	128	79	33.6788	90.8046	5.01465	7.48e-06	0.239862	0.0177716	15	13	4	0.00738525	0.118469
13	group_11053		hypothetical protein	68	9	125	78	35.2332	89.6552	4.71467	1.04e-05	0.332566	0.0177716	18	15	5	0.00753784	0.0962524
14	qorB		hypothetical protein	68	9	125	78	35.2332	89.6552	4.71467	1.04e-05	0.332566	0.0177716	18	15	5	0.00753784	0.0962524
15	group_832		hypothetical protein	68	9	125	78	35.2332	89.6552	4.71467	1.04e-05	0.332566	0.0177716	16	14	5	0.00418091	0.210114
16	group_11042		hypothetical protein	57	6	136	81	29.5337	93.1034	5.65809	1.07e-05	0.343578	0.0177716	14	12	4	0.0129395	0.179565
17	group_15038		hypothetical protein	67	9	126	78	34.715	89.6552	4.60847	1.07e-05	0.344425	0.0177716	16	14	5	0.00418091	0.210114
18	group_15039		hypothetical protein	67	9	126	78	34.715	89.6552	4.60847	1.07e-05	0.344425	0.0177716	16	14	5	0.00418091	0.210114
19	group_15040		hypothetical protein	67	9	126	78	34.715	89.6552	4.60847	1.07e-05	0.344425	0.0177716	16	14	5	0.00418091	0.210114
20	group_11058		hypothetical protein	73	11	120	76	37.8238	87.3563	4.20303	1.11e-05	0.355431	0.0177716	17	14	6	0.0127258	0.332306
21	group_15049		hypothetical protein	48	4	145	83	24.8705	95.4023	6.86897	2.13e-05	0.684487	0.0276155	10	9	2	0.0214844	0.109375
22	merR_1		Mercuric resistance operon regulatory protein	65	9	128	78	33.6788	89.6552	4.40104	3.14e-05	1	0.0276155	16	13	5	0.0212708	0.210114
23	group_11055		hypothetical protein	73	12	120	75	37.8238	86.2069	3.80208	3.88e-05	1	0.0276155	18	14	7	0.0308838	0.480682
24	group_11056		hypothetical protein	73	12	120	75	37.8238	86.2069	3.80208	3.88e-05	1	0.0276155	18	14	7	0.0308838	0.480682
25	group_11057		hypothetical protein	73	12	120	75	37.8238	86.2069	3.80208	3.88e-05	1	0.0276155	18	14	7	0.0308838	0.480682
26	group_11060		hypothetical protein	73	12	120	75	37.8238	86.2069	3.80208	3.88e-05	1	0.0276155	18	14	7	0.0308838	0.480682
27	group_15054		Polyphosphate:ADP phosphotransferase	73	12	120	75	37.8238	86.2069	3.80208	3.88e-05	1	0.0276155	18	14	7	0.0308838	0.480682
28	copA_4		Copper-exporting P-type ATPase	73	12	120	75	37.8238	86.2069	3.80208	3.88e-05	1	0.0276155	18	14	7	0.0308838	0.480682
29	group_15056	lemA_1	Protein LemA	73	12	120	75	37.8238	86.2069	3.80208	3.88e-05	1	0.0276155	18	14	7	0.0308838	0.480682
30	group_15057		hypothetical protein	73	12	120	75	37.8238	86.2069	3.80208	3.88e-05	1	0.0276155	18	14	7	0.0308838	0.480682
31	group_15058		Ribonuclease	73	12	120	75	37.8238	86.2069	3.80208	3.88e-05	1	0.0276155	18	14	7	0.0308838	0.480682
32	group_15059	prs	Ribose-phosphate pyrophosphokinase	73	12	120	75	37.8238	86.2069	3.80208	3.88e-05	1	0.0276155	18	14	7	0.0308838	0.480682
33	ldhA_1		D-lactate dehydrogenase	73	12	120	75	37.8238	86.2069	3.80208	3.88e-05	1	0.0276155	18	14	7	0.0308838	0.480682
34	ubiB_2		putative protein kinase UbiB	73	12	120	75	37.8238	86.2069	3.80208	3.88e-05	1	0.0276155	18	14	7	0.0308838	0.480682
35	zntR_2		HTH-type transcriptional regulator ZntR	73	12	120	75	37.8238	86.2069	3.80208	3.88e-05	1	0.0276155	18	14	7	0.0308838	0.480682
36	ackA_1		Acetate kinase	73	12	120	75	37.8238	86.2069	3.80208	3.88e-05	1	0.0276155	18	14	7	0.0308838	0.480682
37	group_15065		hypothetical protein	73	12	120	75	37.8238	86.2069	3.80208	3.88e-05	1	0.0276155	18	14	7	0.0308838	0.480682
38	merP_1		Mercuric transport protein periplasmic component	73	12	120	75	37.8238	86.2069	3.80208	3.88e-05	1	0.0276155	18	14	7	0.0308838	0.480682
39	group_21156		putative fatty acid methyltransferase	73	12	120	75	37.8238	86.2069	3.80208	3.88e-05	1	0.0276155	18	14	7	0.0308838	0.480682
40	deoA		Thymidine phosphorylase	73	12	120	75	37.8238	86.2069	3.80208	3.88e-05	1	0.0276155	18	14	7	0.0308838	0.480682
41	tetA_1		Tetracycline resistance protein, class B	73	12	120	75	37.8238	86.2069	3.80208	3.88e-05	1	0.0276155	18	14	7	0.0308838	0.480682
42	group_8329		hypothetical protein	73	12	120	75	37.8238	86.2069	3.80208	3.88e-05	1	0.0276155	18	14	7	0.0308838	0.480682
43	xfp		Xylulose-5-phosphate/fructose-6-phosphate phosphoketolase	73	12	120	75	37.8238	86.2069	3.80208	3.88e-05	1	0.0276155	18	14	7	0.0308838	0.480682
44	group_15037		hypothetical protein	61	8	132	79	31.6062	90.8046	4.56345	3.94e-05	1	0.0276155	17	15	5	0.00234985	0.143463
45	group_10490	dmlR_18	HTH-type transcriptional regulator DmlR	12	21	181	66	6.21762	75.8621	0.208366	4.18e-05	1	0.0276155	14	7	10	0.179565	1
46	group_10491		hypothetical protein	12	21	181	66	6.21762	75.8621	0.208366	4.18e-05	1	0.0276155	14	7	10	0.179565	1
47	puuC_4		NADP/NAD-dependent aldehyde dehydrogenase PuuC	12	21	181	66	6.21762	75.8621	0.208366	4.18e-05	1	0.0276155	14	7	10	0.179565	1
48	group_15051		hypothetical protein	66	10	127	77	34.1969	88.5057	4.00157	4.39e-05	1	0.0276155	16	13	6	0.0212708	0.454498
49	group_15052		hypothetical protein	66	10	127	77	34.1969	88.5057	4.00157	4.39e-05	1	0.0276155	16	13	6	0.0212708	0.454498
50	group_15053		hypothetical protein	66	10	127	77	34.1969	88.5057	4.00157	4.39e-05	1	0.0276155	16	13	6	0.0212708	0.454498
51	group_8326		hypothetical protein	66	10	127	77	34.1969	88.5057	4.00157	4.39e-05	1	0.0276155	16	13	6	0.0212708	0.454498
52	group_245		hypothetical protein	56	7	137	80	29.0155	91.954	4.67153	4.97e-05	1	0.0306483	16	13	5	0.0212708	0.210114
53	group_15073		hypothetical protein	49	5	144	82	25.3886	94.2529	5.58056	6.18e-05	1	0.037372	11	9	3	0.0654297	0.226562
54	cusA		Cation efflux system protein CusA	80	15	113	72	41.4508	82.7586	3.39823	6.65e-05	1	0.0389004	23	19	9	0.00259948	0.404873
55	group_15048		hypothetical protein	59	8	134	79	30.5699	90.8046	4.34795	6.67e-05	1	0.0389004	13	11	4	0.0224609	0.266846
56	group_6411		hypothetical protein	160	52	33	35	82.9016	40.2299	3.2634	7.02e-05	1	0.0401917	20	11	11	0.823803	0.823803
57	group_8077		hypothetical protein	159	52	34	35	82.3834	40.2299	3.14762	8.48e-05	1	0.0464983	19	10	11	0.647606	1
58	group_15032		hypothetical protein	62	9	131	78	32.1244	89.6552	4.10178	9.09e-05	1	0.0464983	17	15	6	0.00234985	0.332306
59	group_15033		hypothetical protein	62	9	131	78	32.1244	89.6552	4.10178	9.09e-05	1	0.0464983	17	15	6	0.00234985	0.332306
60	group_15034		hypothetical protein	62	9	131	78	32.1244	89.6552	4.10178	9.09e-05	1	0.0464983	17	15	6	0.00234985	0.332306
61	group_15035		hypothetical protein	62	9	131	78	32.1244	89.6552	4.10178	9.09e-05	1	0.0464983	17	15	6	0.00234985	0.332306
62	group_15036		hypothetical protein	62	9	131	78	32.1244	89.6552	4.10178	9.09e-05	1	0.0464983	17	15	6	0.00234985	0.332306
63	cusR		Transcriptional regulatory protein CusR	87	18	106	69	45.0777	79.3103	3.14623	9.75e-05	1	0.0464983	28	22	10	0.00371917	0.184933
64	copB_1		Copper resistance protein B	87	18	106	69	45.0777	79.3103	3.14623	9.75e-05	1	0.0464983	28	22	10	0.00371917	0.184933
65	group_11061	cusS_1	Sensor kinase CusS	86	18	107	69	44.5596	79.3103	3.081	0.000105869	1	0.0464983	27	21	10	0.00592461	0.247789
66	group_12084	copA_2	Copper resistance protein A	86	18	107	69	44.5596	79.3103	3.081	0.000105869	1	0.0464983	27	21	10	0.00592461	0.247789
67	copA_3		Copper-exporting P-type ATPase	86	18	107	69	44.5596	79.3103	3.081	0.000105869	1	0.0464983	27	21	10	0.00592461	0.247789
68	copC		Copper resistance protein C	86	18	107	69	44.5596	79.3103	3.081	0.000105869	1	0.0464983	27	21	10	0.00592461	0.247789
69	copD		Copper resistance protein D	86	18	107	69	44.5596	79.3103	3.081	0.000105869	1	0.0464983	27	21	10	0.00592461	0.247789
70	copK		Copper resistance protein K	86	18	107	69	44.5596	79.3103	3.081	0.000105869	1	0.0464983	27	21	10	0.00592461	0.247789
71	group_5454		hypothetical protein	86	18	107	69	44.5596	79.3103	3.081	0.000105869	1	0.0464983	27	21	10	0.00592461	0.247789
72	group_8331		hypothetical protein	86	18	107	69	44.5596	79.3103	3.081	0.000105869	1	0.0464983	27	21	10	0.00592461	0.247789
73	group_9173	hcaR_1	Hca operon transcriptional activator HcaR	86	18	107	69	44.5596	79.3103	3.081	0.000105869	1	0.0464983	27	21	10	0.00592461	0.247789
74	cusB		Cation efflux system protein CusB	78	15	115	72	40.4145	82.7586	3.25565	0.000113969	1	0.0493796	23	18	9	0.010622	0.404873
75	intS_2		Prophage integrase IntS	81	16	112	71	41.9689	81.6092	3.20926	0.00012726	1	0.0544026	25	22	10	0.000156522	0.424356
76	group_3009	malQ	4-alpha-glucanotransferase	62	10	131	77	32.1244	88.5057	3.64427	0.000194098	1	0.0818838	22	19	6	0.000855446	0.0524788
77	group_3094		hypothetical protein	177	65	16	22	91.7098	25.2874	3.74423	0.000256173	1	0.106668	18	11	10	0.480682	0.814529
78	group_227	lasR	Transcriptional activator protein LasR	8	16	185	71	4.14508	81.6092	0.191892	0.000269414	1	0.110743	14	7	10	0.179565	1
79	group_15067		hypothetical protein	83	18	110	69	43.0052	79.3103	2.89242	0.00027918	1	0.113305	27	21	10	0.00592461	0.247789
80	group_11796	soxR_2	Redox-sensitive transcriptional activator SoxR	55	8	138	79	28.4974	90.8046	3.93569	0.000311579	1	0.124873	13	11	4	0.0224609	0.266846
81	dps		putative protein	10	17	183	70	5.18135	80.4598	0.225008	0.000348533	1	0.137959	11	5	9	0.0654297	1
82	group_6410		hypothetical protein	29	30	164	57	15.0259	65.5172	0.335976	0.000419956	1	0.164203	18	9	11	0.480682	1
83	rfbD		dTDP-4-dehydrorhamnose reductase	192	79	1	8	99.4819	9.1954	19.443	0.000460562	1	0.17791	3	3	1	0.25	1
84	group_11049		hypothetical protein	65	12	128	75	33.6788	86.2069	3.17383	0.000480937	1	0.183569	18	12	8	0.237885	0.814529
85	group_15047		hypothetical protein	59	10	134	77	30.5699	88.5057	3.3903	0.000511524	1	0.192947	17	16	6	0.000274658	0.332306
86	group_8078		hypothetical protein	30	30	163	57	15.544	65.5172	0.349693	0.000523595	1	0.195204	19	10	11	0.647606	1
87	group_14601		hypothetical protein	8	15	185	72	4.14508	82.7586	0.207568	0.000576816	1	0.198859	12	6	9	0.145996	1
88	tfdF		Maleylacetate reductase	8	15	185	72	4.14508	82.7586	0.207568	0.000576816	1	0.198859	12	6	9	0.145996	1
89	chqB		Hydroxyquinol 1,2-dioxygenase	8	15	185	72	4.14508	82.7586	0.207568	0.000576816	1	0.198859	12	6	9	0.145996	1
90	yciI_2		Protein YciI	8	15	185	72	4.14508	82.7586	0.207568	0.000576816	1	0.198859	12	6	9	0.145996	1
91	bepA_6		Beta-barrel assembly-enhancing protease	8	15	185	72	4.14508	82.7586	0.207568	0.000576816	1	0.198859	12	6	9	0.145996	1
92	group_15344		hypothetical protein	8	15	185	72	4.14508	82.7586	0.207568	0.000576816	1	0.198859	12	6	9	0.145996	1
93	group_2712	yheS_2	putative ABC transporter ATP-binding protein YheS	8	15	185	72	4.14508	82.7586	0.207568	0.000576816	1	0.198859	12	6	9	0.145996	1
94	group_1191		hypothetical protein	95	24	98	63	49.2228	72.4138	2.54464	0.000692235	1	0.233626	30	20	14	0.0987371	0.855536
95	group_3011		hypothetical protein	95	24	98	63	49.2228	72.4138	2.54464	0.000692235	1	0.233626	30	20	14	0.0987371	0.855536
96	group_1267		hypothetical protein	82	19	111	68	42.487	78.1609	2.64391	0.000788666	1	0.263207	27	18	13	0.122078	1
97	group_13259		hypothetical protein	0	6	193	81	0	93.1034	0	0.000796305	1	0.263207	4	0	4	0.125	0.125
98	spo0C_1		Chromosome-partitioning protein Spo0J	30	2	163	85	15.544	97.7011	7.82209	0.000850913	1	0.277233	17	16	2	0.000274658	0.00234985
99	group_8237		putative protein	182	70	11	17	94.3005	19.5402	4.01818	0.00085603	1	0.277233	12	9	6	0.145996	1
100	trxC		Thioredoxin 2	37	4	156	83	19.171	95.4023	4.92147	0.000894763	1	0.286879	21	18	4	0.00148964	0.00719738
101	clsA		Major cardiolipin synthase ClsA	38	4	155	83	19.6891	95.4023	5.0871	0.000903885	1	0.286934	21	18	4	0.00148964	0.00719738
102	group_2739		hypothetical protein	77	17	116	70	39.8964	80.4598	2.73327	0.000960831	1	0.302021	22	18	8	0.00434351	0.286279
103	group_10492		hypothetical protein	9	15	184	72	4.66321	82.7586	0.234783	0.000977135	1	0.304164	13	7	9	0.266846	1
104	group_17760		hypothetical protein	76	17	117	70	39.3782	80.4598	2.67471	0.0010038	1	0.309461	24	18	12	0.0226558	1
105	group_2555		hypothetical protein	91	23	102	64	47.1503	73.5632	2.48252	0.00104953	1	0.314634	29	20	13	0.0614283	0.711071
106	group_3315		hypothetical protein	91	23	102	64	47.1503	73.5632	2.48252	0.00104953	1	0.314634	29	20	13	0.0614283	0.711071
107	group_11300		hypothetical protein	59	11	134	76	30.5699	87.3563	3.04206	0.00105002	1	0.314634	22	18	7	0.00434351	0.133801
108	group_6960		hypothetical protein	19	0	174	87	9.84456	100	inf	0.00122275	1	0.360159	14	14	0	0.00012207	0.00012207
109	group_11052		hypothetical protein	70	15	123	72	36.2694	82.7586	2.73171	0.00122442	1	0.360159	20	18	8	0.000402451	0.503445
110	atsA_2		Arylsulfatase	8	14	185	73	4.14508	83.908	0.225483	0.0012493	1	0.364137	11	6	8	0.226562	1
111	yheS_2		putative ABC transporter ATP-binding protein YheS	183	71	10	16	94.8187	18.3908	4.12394	0.00126182	1	0.364472	16	10	9	0.454498	0.803619
112	rmf		Ribosome modulation factor	163	58	30	29	84.456	33.3333	2.71667	0.00136503	1	0.387546	17	9	9	1	1
113	hspA_2		Spore protein SP21	36	4	157	83	18.6528	95.4023	4.75796	0.00144619	1	0.387546	20	17	4	0.00257683	0.0118179
114	group_5843		hypothetical protein	32	3	161	84	16.5803	96.5517	5.56522	0.00149029	1	0.387546	16	14	3	0.00418091	0.0212708
115	group_2115		hypothetical protein	90	23	103	64	46.6321	73.5632	2.43141	0.00155381	1	0.387546	28	19	13	0.0871586	0.850554
116	group_2502		hypothetical protein	90	23	103	64	46.6321	73.5632	2.43141	0.00155381	1	0.387546	28	19	13	0.0871586	0.850554
117	group_3016		hypothetical protein	90	23	103	64	46.6321	73.5632	2.43141	0.00155381	1	0.387546	28	19	13	0.0871586	0.850554
118	group_834		hypothetical protein	90	23	103	64	46.6321	73.5632	2.43141	0.00155381	1	0.387546	28	19	13	0.0871586	0.850554
119	phzA1		Phenazine biosynthesis protein PhzA1	128	40	65	47	66.3212	54.023	2.31385	0.00156466	1	0.387546	44	26	20	0.291215	0.651588
120	group_15031		hypothetical protein	67	14	126	73	34.715	83.908	2.77268	0.00161434	1	0.387546	22	17	9	0.0169005	0.523467
121	group_6618		hypothetical protein	67	14	126	73	34.715	83.908	2.77268	0.00161434	1	0.387546	22	17	9	0.0169005	0.523467
122	topB_2		DNA topoisomerase 3	66	14	127	73	34.1969	83.908	2.70979	0.00167979	1	0.387546	24	20	8	0.00154388	0.15159
123	group_5933	nimR_8	HTH-type transcriptional regulator NimR	189	77	4	10	97.9275	11.4943	6.13636	0.00173699	1	0.387546	6	5	2	0.21875	0.6875
124	ccoN1_3		Cbb3-type cytochrome c oxidase subunit CcoN1	190	78	3	9	98.4456	10.3448	7.30769	0.0017938	1	0.387546	12	9	3	0.145996	0.145996
125	dacC		D-alanyl-D-alanine carboxypeptidase DacC	190	78	3	9	98.4456	10.3448	7.30769	0.0017938	1	0.387546	6	5	2	0.21875	0.6875
126	group_3870		hypothetical protein	3	9	190	78	1.5544	89.6552	0.136842	0.0017938	1	0.387546	4	1	4	0.125	0.625
127	group_11114		hypothetical protein	109	31	84	56	56.4767	64.3678	2.34409	0.00185328	1	0.387546	31	23	15	0.0106738	1
128	group_11050		hypothetical protein	61	12	132	75	31.6062	86.2069	2.88826	0.00185607	1	0.387546	18	16	7	0.00131226	0.480682
129	group_11051		hypothetical protein	61	12	132	75	31.6062	86.2069	2.88826	0.00185607	1	0.387546	18	16	7	0.00131226	0.480682
130	group_15046		hypothetical protein	61	12	132	75	31.6062	86.2069	2.88826	0.00185607	1	0.387546	19	17	7	0.000728607	0.359283
131	cmpR_5		HTH-type transcriptional activator CmpR	60	12	133	75	31.0881	86.2069	2.81955	0.00190651	1	0.387546	20	16	9	0.0118179	0.823803
132	wapA		tRNA(Glu)-specific nuclease WapA	82	20	111	67	42.487	77.0115	2.47477	0.00194626	1	0.387546	26	20	12	0.00935531	0.845019
133	group_11047		hypothetical protein	89	23	104	64	46.114	73.5632	2.38127	0.0023347	1	0.387546	28	19	13	0.0871586	0.850554
134	group_11048		Putative ribonuclease VapC50	89	23	104	64	46.114	73.5632	2.38127	0.0023347	1	0.387546	28	19	13	0.0871586	0.850554
135	group_15042		hypothetical protein	89	23	104	64	46.114	73.5632	2.38127	0.0023347	1	0.387546	28	19	13	0.0871586	0.850554
136	group_15043		hypothetical protein	89	23	104	64	46.114	73.5632	2.38127	0.0023347	1	0.387546	28	19	13	0.0871586	0.850554
137	group_15044		hypothetical protein	89	23	104	64	46.114	73.5632	2.38127	0.0023347	1	0.387546	28	19	13	0.0871586	0.850554
138	group_15045		hypothetical protein	89	23	104	64	46.114	73.5632	2.38127	0.0023347	1	0.387546	28	19	13	0.0871586	0.850554
139	group_2733		hypothetical protein	89	23	104	64	46.114	73.5632	2.38127	0.0023347	1	0.387546	28	19	13	0.0871586	0.850554
140	recF_2		DNA replication and repair protein RecF	89	23	104	64	46.114	73.5632	2.38127	0.0023347	1	0.387546	28	19	13	0.0871586	0.850554
141	group_5450		hypothetical protein	89	23	104	64	46.114	73.5632	2.38127	0.0023347	1	0.387546	28	19	13	0.0871586	0.850554
142	group_6620		hypothetical protein	89	23	104	64	46.114	73.5632	2.38127	0.0023347	1	0.387546	28	19	13	0.0871586	0.850554
143	group_8324	ftsH_2	ATP-dependent zinc metalloprotease FtsH	89	23	104	64	46.114	73.5632	2.38127	0.0023347	1	0.387546	28	19	13	0.0871586	0.850554
144	kefC_1		Glutathione-regulated potassium-efflux system protein KefC	34	4	159	83	17.6166	95.4023	4.43711	0.00237941	1	0.387546	19	16	4	0.00442505	0.0192108
145	group_8822		hypothetical protein	27	2	166	85	13.9896	97.7011	6.91265	0.00238522	1	0.387546	8	7	2	0.0703125	0.289062
146	group_3537		hypothetical protein	35	4	158	83	18.1347	95.4023	4.59652	0.00239765	1	0.387546	20	17	4	0.00257683	0.0118179
147	group_5722	bicA_2	Bicarbonate transporter BicA	35	4	158	83	18.1347	95.4023	4.59652	0.00239765	1	0.387546	29	26	4	1.52e-05	0.000103716
148	group_414		hypothetical protein	26	2	167	85	13.4715	97.7011	6.61677	0.0024272	1	0.387546	7	6	2	0.125	0.453125
149	ftsH4		ATP-dependent zinc metalloprotease FtsH 4	45	7	148	80	23.3161	91.954	3.4749	0.00249556	1	0.387546	24	21	5	0.000277162	0.00661075
150	group_4780		hypothetical protein	30	3	163	84	15.544	96.5517	5.15337	0.00250424	1	0.387546	8	7	3	0.0703125	0.726562
151	group_16154		hypothetical protein	0	5	193	82	0	94.2529	0	0.00267053	1	0.387546	3	0	3	0.25	0.25
152	group_16155		hypothetical protein	0	5	193	82	0	94.2529	0	0.00267053	1	0.387546	3	0	3	0.25	0.25
153	group_8619	vgrG1_3	hypothetical protein	0	5	193	82	0	94.2529	0	0.00267053	1	0.387546	3	0	3	0.25	0.25
154	group_8699		hypothetical protein	0	5	193	82	0	94.2529	0	0.00267053	1	0.387546	3	0	3	0.25	0.25
155	group_5435	menH_1	hypothetical protein	58	43	135	44	30.0518	50.5747	0.439621	0.0029527	1	0.387546	27	15	16	0.442068	0.701108
156	group_1470	hcpA_1	Major exported protein	40	6	153	81	20.7254	93.1034	3.52941	0.00301815	1	0.387546	16	11	6	0.210114	0.454498
157	group_2845		hypothetical protein	40	6	153	81	20.7254	93.1034	3.52941	0.00301815	1	0.387546	29	24	6	0.000546113	0.0023157
158	hss		Homospermidine synthase	84	22	109	65	43.5233	74.7126	2.2769	0.00351983	1	0.387546	25	17	16	0.107752	0.229523
159	group_11858		hypothetical protein	84	22	109	65	43.5233	74.7126	2.2769	0.00351983	1	0.387546	25	17	16	0.107752	0.229523
160	group_17762		hypothetical protein	84	22	109	65	43.5233	74.7126	2.2769	0.00351983	1	0.387546	25	17	16	0.107752	0.229523
161	group_17763		hypothetical protein	84	22	109	65	43.5233	74.7126	2.2769	0.00351983	1	0.387546	25	17	16	0.107752	0.229523
162	group_17764		hypothetical protein	84	22	109	65	43.5233	74.7126	2.2769	0.00351983	1	0.387546	25	17	16	0.107752	0.229523
163	xerC_2		Tyrosine recombinase XerC	84	22	109	65	43.5233	74.7126	2.2769	0.00351983	1	0.387546	25	17	16	0.107752	0.229523
164	group_11100		hypothetical protein	16	0	177	87	8.29016	100	inf	0.00372156	1	0.387546	12	12	0	0.000488281	0.000488281
165	group_4643		hypothetical protein	17	19	176	68	8.80829	78.1609	0.345694	0.00373214	1	0.387546	19	11	11	0.647606	0.647606
166	group_2910		hypothetical protein	33	4	160	83	17.0984	95.4023	4.27969	0.00377363	1	0.387546	18	15	4	0.00753784	0.0308838
167	group_3972		hypothetical protein	33	4	160	83	17.0984	95.4023	4.27969	0.00377363	1	0.387546	20	18	3	0.000402451	0.00257683
168	group_6777		hypothetical protein	33	4	160	83	17.0984	95.4023	4.27969	0.00377363	1	0.387546	12	10	4	0.0385742	0.387695
169	group_9178		hypothetical protein	33	4	160	83	17.0984	95.4023	4.27969	0.00377363	1	0.387546	8	7	2	0.0703125	0.289062
170	group_3019		hypothetical protein	49	9	144	78	25.3886	89.6552	2.94907	0.00393111	1	0.387546	31	27	7	3.4e-05	0.00332689
171	chrC		Superoxide dismutase [Fe]	29	3	164	84	15.0259	96.5517	4.95122	0.00399043	1	0.387546	7	7	1	0.015625	0.125
172	chrA		Chromate transport protein	29	3	164	84	15.0259	96.5517	4.95122	0.00399043	1	0.387546	7	7	1	0.015625	0.125
173	chrB1		Protein ChrB	29	3	164	84	15.0259	96.5517	4.95122	0.00399043	1	0.387546	7	7	1	0.015625	0.125
174	group_11321		hypothetical protein	1	6	192	81	0.518135	93.1034	0.0703125	0.00416171	1	0.387546	5	1	4	0.375	0.375
175	group_11495		hypothetical protein	1	6	192	81	0.518135	93.1034	0.0703125	0.00416171	1	0.387546	2	1	2	0.5	1
176	group_15937	kefF_2	Glutathione-regulated potassium-efflux system ancillary protein KefF	1	6	192	81	0.518135	93.1034	0.0703125	0.00416171	1	0.387546	2	1	2	0.5	1
177	group_16044		hypothetical protein	1	6	192	81	0.518135	93.1034	0.0703125	0.00416171	1	0.387546	2	1	2	0.5	1
178	group_16045		hypothetical protein	1	6	192	81	0.518135	93.1034	0.0703125	0.00416171	1	0.387546	2	1	2	0.5	1
179	group_16212	zraR_1	Transcriptional regulatory protein ZraR	1	6	192	81	0.518135	93.1034	0.0703125	0.00416171	1	0.387546	2	1	2	0.5	1
180	group_16213		hypothetical protein	1	6	192	81	0.518135	93.1034	0.0703125	0.00416171	1	0.387546	2	1	2	0.5	1
181	group_16214		hypothetical protein	1	6	192	81	0.518135	93.1034	0.0703125	0.00416171	1	0.387546	2	1	2	0.5	1
182	group_16215		hypothetical protein	1	6	192	81	0.518135	93.1034	0.0703125	0.00416171	1	0.387546	2	1	2	0.5	1
183	nylB'_1		6-aminohexanoate-dimer hydrolase	1	6	192	81	0.518135	93.1034	0.0703125	0.00416171	1	0.387546	2	1	2	0.5	1
184	group_16438		putative HTH-type transcriptional regulator	1	6	192	81	0.518135	93.1034	0.0703125	0.00416171	1	0.387546	2	1	2	0.5	1
185	group_16458		hypothetical protein	1	6	192	81	0.518135	93.1034	0.0703125	0.00416171	1	0.387546	2	1	2	0.5	1
186	group_16702		hypothetical protein	1	6	192	81	0.518135	93.1034	0.0703125	0.00416171	1	0.387546	2	1	2	0.5	1
187	group_16703		hypothetical protein	1	6	192	81	0.518135	93.1034	0.0703125	0.00416171	1	0.387546	2	1	2	0.5	1
188	group_17167		hypothetical protein	1	6	192	81	0.518135	93.1034	0.0703125	0.00416171	1	0.387546	2	1	2	0.5	1
189	group_17442		hypothetical protein	1	6	192	81	0.518135	93.1034	0.0703125	0.00416171	1	0.387546	2	1	2	0.5	1
190	group_19888		hypothetical protein	1	6	192	81	0.518135	93.1034	0.0703125	0.00416171	1	0.387546	7	1	6	0.125	0.125
191	group_26182		hypothetical protein	1	6	192	81	0.518135	93.1034	0.0703125	0.00416171	1	0.387546	5	1	5	0.0625	0.375
192	group_26185		hypothetical protein	1	6	192	81	0.518135	93.1034	0.0703125	0.00416171	1	0.387546	5	1	5	0.0625	0.375
193	group_5679	vgrG1_6	Actin cross-linking toxin VgrG1	1	6	192	81	0.518135	93.1034	0.0703125	0.00416171	1	0.387546	2	1	2	0.5	1
194	group_11039		hypothetical protein	76	19	117	68	39.3782	78.1609	2.32479	0.00420017	1	0.387546	25	19	13	0.0146333	1
195	lspA_1		Lipoprotein signal peptidase	76	19	117	68	39.3782	78.1609	2.32479	0.00420017	1	0.387546	25	19	13	0.0146333	1
196	ccoN1_2		Cbb3-type cytochrome c oxidase subunit CcoN1	4	9	189	78	2.07254	89.6552	0.183422	0.00432211	1	0.387546	13	4	9	0.266846	0.266846
197	group_6024	dacC	D-alanyl-D-alanine carboxypeptidase DacC	4	9	189	78	2.07254	89.6552	0.183422	0.00432211	1	0.387546	5	2	4	0.375	1
198	group_32991		hypothetical protein	161	59	32	28	83.4197	32.1839	2.38771	0.00448838	1	0.387546	29	18	15	0.264931	1
199	dadA1_1		D-amino acid dehydrogenase 1	190	79	3	8	98.4456	9.1954	6.4135	0.00465282	1	0.387546	3	3	1	0.25	1
200	group_10238	cynR_1	HTH-type transcriptional regulator CynR	190	79	3	8	98.4456	9.1954	6.4135	0.00465282	1	0.387546	2	2	1	0.5	1
201	drgA		Protein DrgA	190	79	3	8	98.4456	9.1954	6.4135	0.00465282	1	0.387546	2	2	1	0.5	1
202	gbpR_4		HTH-type transcriptional regulator GbpR	190	79	3	8	98.4456	9.1954	6.4135	0.00465282	1	0.387546	3	3	1	0.25	1
203	rmlC		dTDP-4-dehydrorhamnose 3,5-epimerase	190	79	3	8	98.4456	9.1954	6.4135	0.00465282	1	0.387546	2	2	1	0.5	1
204	yrfG		GMP/IMP nucleotidase YrfG	190	79	3	8	98.4456	9.1954	6.4135	0.00465282	1	0.387546	2	2	1	0.5	1
205	adh1		Long-chain-alcohol dehydrogenase 1	190	79	3	8	98.4456	9.1954	6.4135	0.00465282	1	0.387546	2	2	1	0.5	1
206	nodD2_1		Nodulation protein D 2	190	79	3	8	98.4456	9.1954	6.4135	0.00465282	1	0.387546	2	2	1	0.5	1
207	group_14463		hypothetical protein	190	79	3	8	98.4456	9.1954	6.4135	0.00465282	1	0.387546	2	2	1	0.5	1
208	group_14508		hypothetical protein	190	79	3	8	98.4456	9.1954	6.4135	0.00465282	1	0.387546	3	3	1	0.25	1
209	sdgD		Gentisate 1,2-dioxygenase	190	79	3	8	98.4456	9.1954	6.4135	0.00465282	1	0.387546	3	3	1	0.25	1
210	pcaK_3		4-hydroxybenzoate transporter PcaK	190	79	3	8	98.4456	9.1954	6.4135	0.00465282	1	0.387546	3	3	1	0.25	1
211	nagL_1		Maleylpyruvate isomerase	190	79	3	8	98.4456	9.1954	6.4135	0.00465282	1	0.387546	3	3	1	0.25	1
212	valS		hypothetical protein	190	79	3	8	98.4456	9.1954	6.4135	0.00465282	1	0.387546	10	7	3	0.34375	0.34375
213	fdhD		Sulfur carrier protein FdhD	190	79	3	8	98.4456	9.1954	6.4135	0.00465282	1	0.387546	2	2	1	0.5	1
214	group_3869		hypothetical protein	190	79	3	8	98.4456	9.1954	6.4135	0.00465282	1	0.387546	3	3	1	0.25	1
215	feaR		Transcriptional activator FeaR	190	79	3	8	98.4456	9.1954	6.4135	0.00465282	1	0.387546	3	3	1	0.25	1
216	group_4345		1,4-dihydroxy-2-naphthoyl-CoA hydrolase	190	79	3	8	98.4456	9.1954	6.4135	0.00465282	1	0.387546	2	2	1	0.5	1
217	aroQ		Monofunctional chorismate mutase	190	79	3	8	98.4456	9.1954	6.4135	0.00465282	1	0.387546	2	2	1	0.5	1
218	hslR		Heat shock protein 15	190	79	3	8	98.4456	9.1954	6.4135	0.00465282	1	0.387546	2	2	1	0.5	1
219	group_7596		hypothetical protein	190	79	3	8	98.4456	9.1954	6.4135	0.00465282	1	0.387546	2	2	1	0.5	1
220	group_7792		hypothetical protein	190	79	3	8	98.4456	9.1954	6.4135	0.00465282	1	0.387546	2	2	1	0.5	1
221	lpxT		Lipid A 1-diphosphate synthase	190	79	3	8	98.4456	9.1954	6.4135	0.00465282	1	0.387546	2	2	1	0.5	1
222	eta		Exotoxin A	190	79	3	8	98.4456	9.1954	6.4135	0.00465282	1	0.387546	5	4	3	0.375	1
223	group_8241	fecR_9	Protein FecR	190	79	3	8	98.4456	9.1954	6.4135	0.00465282	1	0.387546	3	3	1	0.25	1
224	group_16537		hypothetical protein	3	8	190	79	1.5544	90.8046	0.155921	0.00465282	1	0.387546	2	1	2	0.5	1
225	group_16538	ybbJ	Inner membrane protein YbbJ	3	8	190	79	1.5544	90.8046	0.155921	0.00465282	1	0.387546	2	1	2	0.5	1
226	group_16539	hslR	Heat shock protein 15	3	8	190	79	1.5544	90.8046	0.155921	0.00465282	1	0.387546	2	1	2	0.5	1
227	group_16540	lpxT	Lipid A 1-diphosphate synthase	3	8	190	79	1.5544	90.8046	0.155921	0.00465282	1	0.387546	2	1	2	0.5	1
228	group_16541		hypothetical protein	3	8	190	79	1.5544	90.8046	0.155921	0.00465282	1	0.387546	2	1	2	0.5	1
229	group_16542	drgA	Protein DrgA	3	8	190	79	1.5544	90.8046	0.155921	0.00465282	1	0.387546	2	1	2	0.5	1
230	group_16544	fadB_4	Fatty acid oxidation complex subunit alpha	3	8	190	79	1.5544	90.8046	0.155921	0.00465282	1	0.387546	2	1	2	0.5	1
231	group_16545	adh1	Long-chain-alcohol dehydrogenase 1	3	8	190	79	1.5544	90.8046	0.155921	0.00465282	1	0.387546	2	1	2	0.5	1
232	group_16546		hypothetical protein	3	8	190	79	1.5544	90.8046	0.155921	0.00465282	1	0.387546	2	1	2	0.5	1
233	aroQ_2		Monofunctional chorismate mutase	3	8	190	79	1.5544	90.8046	0.155921	0.00465282	1	0.387546	2	1	2	0.5	1
234	group_16664		hypothetical protein	3	8	190	79	1.5544	90.8046	0.155921	0.00465282	1	0.387546	2	1	2	0.5	1
235	group_16665	cynR_6	HTH-type transcriptional regulator CynR	3	8	190	79	1.5544	90.8046	0.155921	0.00465282	1	0.387546	2	1	2	0.5	1
236	group_16666	yrfG	GMP/IMP nucleotidase YrfG	3	8	190	79	1.5544	90.8046	0.155921	0.00465282	1	0.387546	2	1	2	0.5	1
237	group_16667	rmlC	dTDP-4-dehydrorhamnose 3,5-epimerase	3	8	190	79	1.5544	90.8046	0.155921	0.00465282	1	0.387546	2	1	2	0.5	1
238	group_3718	gabD	Succinate-semialdehyde dehydrogenase [NADP(+)]	3	8	190	79	1.5544	90.8046	0.155921	0.00465282	1	0.387546	3	1	3	0.25	1
239	group_5091		hypothetical protein	3	8	190	79	1.5544	90.8046	0.155921	0.00465282	1	0.387546	3	1	3	0.25	1
240	group_5369	dctP_1	C4-dicarboxylate-binding periplasmic protein DctP	3	8	190	79	1.5544	90.8046	0.155921	0.00465282	1	0.387546	3	1	3	0.25	1
241	group_8663	fdhD	Sulfur carrier protein FdhD	3	8	190	79	1.5544	90.8046	0.155921	0.00465282	1	0.387546	2	1	2	0.5	1
242	lgrB		Linear gramicidin synthase subunit B	2	7	191	80	1.03627	91.954	0.119671	0.00468962	1	0.387546	5	2	4	0.375	1
243	group_1864	pchR_1	Regulatory protein PchR	6	11	187	76	3.10881	87.3563	0.221682	0.00477944	1	0.387546	7	4	5	0.453125	1
244	group_5652		hypothetical protein	45	8	148	79	23.3161	90.8046	3.00253	0.00490735	1	0.387546	28	24	7	0.000179991	0.012541
245	ptxB		putative phosphite transport system-binding protein PtxB	60	13	133	74	31.0881	85.0575	2.56796	0.00496593	1	0.387546	19	15	9	0.0192108	1
246	ptxD		Phosphonate dehydrogenase	60	13	133	74	31.0881	85.0575	2.56796	0.00496593	1	0.387546	19	15	9	0.0192108	1
247	glnQ_4		Glutamine transport ATP-binding protein GlnQ	60	13	133	74	31.0881	85.0575	2.56796	0.00496593	1	0.387546	19	15	9	0.0192108	1
248	phnE_4		Phosphate-import permease protein PhnE	60	13	133	74	31.0881	85.0575	2.56796	0.00496593	1	0.387546	19	15	9	0.0192108	1
249	group_4074		hypothetical protein	35	5	158	82	18.1347	94.2529	3.63291	0.00537688	1	0.387546	19	16	5	0.00442505	0.0635681
	group_4056	yjiK_1	putative protein YjiK	36	5	157	82	18.6528	94.2529	3.76051	0.00548384	1	0.387546	29	25	5	0.000103716	0.000546113
	group_11949		hypothetical protein	20	1	173	86	10.3627	98.8506	9.9422	0.00567325	1	0.387546	11	10	1	0.0117188	0.0117188
	group_11950		hypothetical protein	20	1	173	86	10.3627	98.8506	9.9422	0.00567325	1	0.387546	11	10	1	0.0117188	0.0117188
	group_2117		hypothetical protein	48	9	145	78	24.8705	89.6552	2.86897	0.00599693	1	0.387546	31	27	7	3.4e-05	0.00332689
	group_8781	merP_2	Mercuric transport protein periplasmic component	42	7	151	80	21.7617	91.954	3.17881	0.00601778	1	0.387546	18	15	5	0.00753784	0.0962524
	group_421		hypothetical protein	41	7	152	80	21.2435	91.954	3.08271	0.00603242	1	0.387546	11	9	4	0.0654297	0.548828
	group_12116		hypothetical protein	31	4	162	83	16.0622	95.4023	3.97068	0.00607944	1	0.387546	9	8	2	0.0390625	0.179688
	group_11041		hypothetical protein	75	19	118	68	38.8601	78.1609	2.27475	0.00609411	1	0.387546	24	18	13	0.0226558	0.83882
	zntR_1		HTH-type transcriptional regulator ZntR	75	19	118	68	38.8601	78.1609	2.27475	0.00609411	1	0.387546	24	18	13	0.0226558	0.83882
	group_15028	cadA_1	Cadmium-transporting ATPase	75	19	118	68	38.8601	78.1609	2.27475	0.00609411	1	0.387546	24	18	13	0.0226558	0.83882
	group_15029		hypothetical protein	75	19	118	68	38.8601	78.1609	2.27475	0.00609411	1	0.387546	24	18	13	0.0226558	0.83882
	group_3625		hypothetical protein	75	19	118	68	38.8601	78.1609	2.27475	0.00609411	1	0.387546	34	23	16	0.0576127	0.864166
	group_2504		hypothetical protein	47	9	146	78	24.3523	89.6552	2.78995	0.00609505	1	0.387546	31	27	7	3.4e-05	0.00332689
	group_2557		hypothetical protein	47	9	146	78	24.3523	89.6552	2.78995	0.00609505	1	0.387546	31	27	7	3.4e-05	0.00332689
	group_4828		hypothetical protein	47	9	146	78	24.3523	89.6552	2.78995	0.00609505	1	0.387546	31	27	7	3.4e-05	0.00332689
	group_15180		hypothetical protein	121	39	72	48	62.6943	55.1724	2.06838	0.00615521	1	0.387546	27	13	18	0.122078	1
	group_8016		hypothetical protein	14	0	179	87	7.25389	100	inf	0.0064288	1	0.387546	7	7	0	0.015625	0.015625
	group_12553		hypothetical protein	24	2	169	85	12.4352	97.7011	6.0355	0.00647647	1	0.387546	6	5	2	0.21875	0.6875
	group_15094		hypothetical protein	24	2	169	85	12.4352	97.7011	6.0355	0.00647647	1	0.387546	16	15	2	0.000518799	0.00418091
	relE		mRNA interferase toxin RelE	28	3	165	84	14.5078	96.5517	4.75152	0.00651729	1	0.387546	7	6	2	0.125	0.453125
	group_18894		hypothetical protein	28	3	165	84	14.5078	96.5517	4.75152	0.00651729	1	0.387546	6	5	2	0.21875	0.6875
	yafN		Antitoxin YafN	28	3	165	84	14.5078	96.5517	4.75152	0.00651729	1	0.387546	7	6	2	0.125	0.453125
	group_5708		hypothetical protein	28	3	165	84	14.5078	96.5517	4.75152	0.00651729	1	0.387546	19	17	3	0.000728607	0.00442505
	hsdR_1		Type-1 restriction enzyme R protein	27	3	166	84	13.9896	96.5517	4.55422	0.00657868	1	0.387546	4	4	1	0.125	0.625
	group_12117		hypothetical protein	27	3	166	84	13.9896	96.5517	4.55422	0.00657868	1	0.387546	5	4	2	0.375	1
	group_18893		hypothetical protein	27	3	166	84	13.9896	96.5517	4.55422	0.00657868	1	0.387546	5	4	2	0.375	1
	group_18895		hypothetical protein	27	3	166	84	13.9896	96.5517	4.55422	0.00657868	1	0.387546	5	4	2	0.375	1
	group_18896	uvrD_2	DNA helicase II	27	3	166	84	13.9896	96.5517	4.55422	0.00657868	1	0.387546	5	4	2	0.375	1
	agaA		N-acetylgalactosamine-6-phosphate deacetylase	110	34	83	53	56.9948	60.9195	2.06591	0.00662358	1	0.387546	34	24	17	0.0243065	1
	group_4020	epsF_1	Type II secretion system protein F	79	51	114	36	40.9326	41.3793	0.489164	0.00668665	1	0.387546	21	15	15	0.0783539	0.0783539
	merT_2		Mercuric transport protein MerT	38	6	155	81	19.6891	93.1034	3.30968	0.00716686	1	0.387546	15	12	4	0.0351562	0.118469
	lgrB_1		Linear gramicidin synthase subunit B	186	76	7	11	96.3731	12.6437	3.84586	0.00734262	1	0.387546	9	6	5	0.507812	1
	prkC_2		Serine/threonine-protein kinase PrkC	178	70	15	17	92.228	19.5402	2.8819	0.00737739	1	0.387546	15	9	9	0.607239	0.607239
	rhsC_3		Putative deoxyribonuclease RhsC	15	17	178	70	7.77202	80.4598	0.346993	0.00737739	1	0.387546	23	11	15	0.21004	1
	menH_2		hypothetical protein	127	42	66	45	65.8031	51.7241	2.06169	0.00807747	1	0.387546	31	18	18	0.47313	0.47313
	group_8290		hypothetical protein	34	28	159	59	17.6166	67.8161	0.450584	0.00826625	1	0.387546	26	20	12	0.00935531	0.845019
	group_8325		hypothetical protein	71	18	122	69	36.7876	79.3103	2.23087	0.00830233	1	0.387546	24	17	12	0.0639147	1
	group_3149	intA	Prophage integrase IntA	34	5	159	82	17.6166	94.2529	3.50692	0.00834982	1	0.387546	12	10	3	0.0385742	0.145996
	group_23833		hypothetical protein	88	25	105	62	45.5959	71.2644	2.07848	0.00853375	1	0.387546	14	11	8	0.057373	0.790527
	group_6706		hypothetical protein	88	25	105	62	45.5959	71.2644	2.07848	0.00853375	1	0.387546	14	11	8	0.057373	0.790527
	group_1828	prkC_2	Serine/threonine-protein kinase PrkC	19	19	174	68	9.84456	78.1609	0.390805	0.00858283	1	0.387546	20	12	11	0.503445	0.823803
	group_9357		hypothetical protein	193	83	0	4	100	4.5977	inf	0.00888033	1	0.387546	4	4	0	0.125	0.125
	group_11678		hypothetical protein	0	4	193	83	0	95.4023	0	0.00888033	1	0.387546	3	0	3	0.25	0.25
	group_12293	dsbD_3	Thiol:disulfide interchange protein DsbD	0	4	193	83	0	95.4023	0	0.00888033	1	0.387546	4	0	4	0.125	0.125
	lnt_1		Apolipoprotein N-acyltransferase	0	4	193	83	0	95.4023	0	0.00888033	1	0.387546	4	0	4	0.125	0.125
	group_12456		hypothetical protein	0	4	193	83	0	95.4023	0	0.00888033	1	0.387546	4	0	4	0.125	0.125
	group_16336		hypothetical protein	0	4	193	83	0	95.4023	0	0.00888033	1	0.387546	3	0	3	0.25	0.25
	group_19892	intS_1	Prophage integrase IntS	0	4	193	83	0	95.4023	0	0.00888033	1	0.387546	4	0	4	0.125	0.125
	group_19893		hypothetical protein	0	4	193	83	0	95.4023	0	0.00888033	1	0.387546	4	0	4	0.125	0.125
	group_19894	catM_2	HTH-type transcriptional regulator CatM	0	4	193	83	0	95.4023	0	0.00888033	1	0.387546	4	0	4	0.125	0.125
	group_19895		hypothetical protein	0	4	193	83	0	95.4023	0	0.00888033	1	0.387546	4	0	4	0.125	0.125
	group_19896	merA_1	Mercuric reductase	0	4	193	83	0	95.4023	0	0.00888033	1	0.387546	4	0	4	0.125	0.125
	group_19897		hypothetical protein	0	4	193	83	0	95.4023	0	0.00888033	1	0.387546	4	0	4	0.125	0.125
	group_19898	dsbG_1	Thiol:disulfide interchange protein DsbG	0	4	193	83	0	95.4023	0	0.00888033	1	0.387546	4	0	4	0.125	0.125
	stoA		Sporulation thiol-disulfide oxidoreductase A	0	4	193	83	0	95.4023	0	0.00888033	1	0.387546	4	0	4	0.125	0.125
	group_19900		hypothetical protein	0	4	193	83	0	95.4023	0	0.00888033	1	0.387546	4	0	4	0.125	0.125
	ccmH_2		Cytochrome c-type biogenesis protein CcmH	0	4	193	83	0	95.4023	0	0.00888033	1	0.387546	4	0	4	0.125	0.125
	dsbE_2		Thiol:disulfide interchange protein DsbE	0	4	193	83	0	95.4023	0	0.00888033	1	0.387546	4	0	4	0.125	0.125
	ccmF_2		Cytochrome c-type biogenesis protein CcmF	0	4	193	83	0	95.4023	0	0.00888033	1	0.387546	4	0	4	0.125	0.125
	ccmE_2		Cytochrome c-type biogenesis protein CcmE	0	4	193	83	0	95.4023	0	0.00888033	1	0.387546	4	0	4	0.125	0.125
	group_19905		hypothetical protein	0	4	193	83	0	95.4023	0	0.00888033	1	0.387546	4	0	4	0.125	0.125
	ccmC_2		Heme exporter protein C	0	4	193	83	0	95.4023	0	0.00888033	1	0.387546	4	0	4	0.125	0.125
	ccmB_2		Heme exporter protein B	0	4	193	83	0	95.4023	0	0.00888033	1	0.387546	4	0	4	0.125	0.125
	group_19908	qseB_2	Transcriptional regulatory protein QseB	0	4	193	83	0	95.4023	0	0.00888033	1	0.387546	4	0	4	0.125	0.125
	tsdA_1		Thiosulfate dehydrogenase	0	4	193	83	0	95.4023	0	0.00888033	1	0.387546	4	0	4	0.125	0.125
	group_19911		Cytochrome c4	0	4	193	83	0	95.4023	0	0.00888033	1	0.387546	4	0	4	0.125	0.125
	group_19912		hypothetical protein	0	4	193	83	0	95.4023	0	0.00888033	1	0.387546	4	0	4	0.125	0.125
	ccoN1_5		Cbb3-type cytochrome c oxidase subunit CcoN1	0	4	193	83	0	95.4023	0	0.00888033	1	0.387546	4	0	4	0.125	0.125
	blh		Beta-lactamase hydrolase-like protein	0	4	193	83	0	95.4023	0	0.00888033	1	0.387546	4	0	4	0.125	0.125
	group_19915		putative metallo-hydrolase	0	4	193	83	0	95.4023	0	0.00888033	1	0.387546	4	0	4	0.125	0.125
	ygaP		Inner membrane protein YgaP	0	4	193	83	0	95.4023	0	0.00888033	1	0.387546	4	0	4	0.125	0.125
	ygaV_1		putative HTH-type transcriptional regulator YgaV	0	4	193	83	0	95.4023	0	0.00888033	1	0.387546	4	0	4	0.125	0.125
	rfnT_2		Riboflavin transporter RfnT	0	4	193	83	0	95.4023	0	0.00888033	1	0.387546	4	0	4	0.125	0.125
	group_19919		hypothetical protein	0	4	193	83	0	95.4023	0	0.00888033	1	0.387546	4	0	4	0.125	0.125
	group_19920		hypothetical protein	0	4	193	83	0	95.4023	0	0.00888033	1	0.387546	4	0	4	0.125	0.125
	dmdD		Methylthioacryloyl-CoA hydratase	0	4	193	83	0	95.4023	0	0.00888033	1	0.387546	4	0	4	0.125	0.125
	group_19922		putative HTH-type transcriptional regulator	0	4	193	83	0	95.4023	0	0.00888033	1	0.387546	4	0	4	0.125	0.125
	group_19923		hypothetical protein	0	4	193	83	0	95.4023	0	0.00888033	1	0.387546	4	0	4	0.125	0.125
	group_19925		hypothetical protein	0	4	193	83	0	95.4023	0	0.00888033	1	0.387546	4	0	4	0.125	0.125
	group_23940		hypothetical protein	0	4	193	83	0	95.4023	0	0.00888033	1	0.387546	2	0	2	0.5	0.5
	group_6838	xerC_1	Tyrosine recombinase XerC	0	4	193	83	0	95.4023	0	0.00888033	1	0.387546	2	0	2	0.5	0.5
	group_6932	hin_6	DNA-invertase hin	0	4	193	83	0	95.4023	0	0.00888033	1	0.387546	3	0	3	0.25	0.25
	group_9040	copA_3	Copper-exporting P-type ATPase	0	4	193	83	0	95.4023	0	0.00888033	1	0.387546	4	0	4	0.125	0.125
	group_9042		hypothetical protein	0	4	193	83	0	95.4023	0	0.00888033	1	0.387546	4	0	4	0.125	0.125
	group_11038		hypothetical protein	74	19	119	68	38.342	78.1609	2.22556	0.0089163	1	0.387546	25	19	13	0.0146333	1
	group_15026		Single-stranded DNA-binding protein	74	19	119	68	38.342	78.1609	2.22556	0.0089163	1	0.387546	24	18	13	0.0226558	0.83882
	group_838		hypothetical protein	46	9	147	78	23.8342	89.6552	2.71202	0.0090036	1	0.387546	31	27	7	3.4e-05	0.00332689
	group_8983		hypothetical protein	10	13	183	74	5.18135	85.0575	0.311055	0.00900695	1	0.387546	16	9	7	0.803619	0.803619
	group_15025		hypothetical protein	73	19	120	68	37.8238	78.1609	2.17719	0.00900832	1	0.387546	24	18	13	0.0226558	0.83882
	hspA_1		Spore protein SP21	40	7	153	80	20.7254	91.954	2.98786	0.00908776	1	0.387546	23	20	5	0.000488281	0.010622
	yiiM_1		Protein YiiM	177	70	16	17	91.7098	19.5402	2.68661	0.00927076	1	0.387546	18	10	12	0.237885	0.814529
	group_1838		hypothetical protein	30	4	163	83	15.544	95.4023	3.81902	0.0094549	1	0.387546	19	17	4	0.000728607	0.0192108
	group_4787		hypothetical protein	30	4	163	83	15.544	95.4023	3.81902	0.0094549	1	0.387546	9	7	4	0.179688	1
	group_9006		hypothetical protein	30	4	163	83	15.544	95.4023	3.81902	0.0094549	1	0.387546	10	9	2	0.0214844	0.109375
	group_643	qorA_2	Quinone oxidoreductase 1	97	29	96	58	50.2591	66.6667	2.02083	0.0094856	1	0.387546	34	19	19	0.607591	0.607591
	group_2585		hypothetical protein	18	1	175	86	9.32642	98.8506	8.84571	0.00950585	1	0.387546	12	11	1	0.00634766	0.00634766
	group_1636		hypothetical protein	55	12	138	75	28.4974	86.2069	2.49094	0.00965086	1	0.387546	26	22	7	0.000533521	0.0289593
	group_3778	fhuA_4	Ferrichrome outer membrane transporter/phage receptor	6	10	187	77	3.10881	88.5057	0.247059	0.00974472	1	0.387546	11	4	8	0.226562	0.548828
	group_6510		hypothetical protein	6	10	187	77	3.10881	88.5057	0.247059	0.00974472	1	0.387546	8	5	5	0.726562	0.726562
	group_14276	mmgC_2	Acyl-CoA dehydrogenase	187	77	6	10	96.8912	11.4943	4.04762	0.00974472	1	0.387546	7	5	4	0.453125	1
	group_1936		hypothetical protein	187	77	6	10	96.8912	11.4943	4.04762	0.00974472	1	0.387546	6	4	4	0.6875	0.6875
	barA_6		Signal transduction histidine-protein kinase BarA	187	77	6	10	96.8912	11.4943	4.04762	0.00974472	1	0.387546	7	5	4	0.453125	1
	yycB_3		putative transporter YycB	187	77	6	10	96.8912	11.4943	4.04762	0.00974472	1	0.387546	8	5	4	0.726562	1
	group_6007	srpC_1	Solvent efflux pump outer membrane protein SrpC	187	77	6	10	96.8912	11.4943	4.04762	0.00974472	1	0.387546	8	5	4	0.726562	1
	group_1866		hypothetical protein	19	1	174	86	9.84456	98.8506	9.3908	0.00996489	1	0.387546	12	11	1	0.00634766	0.00634766
	group_12551		hypothetical protein	26	3	167	84	13.4715	96.5517	4.35928	0.0102832	1	0.387546	6	5	2	0.21875	0.6875
	group_17805		hypothetical protein	26	3	167	84	13.4715	96.5517	4.35928	0.0102832	1	0.387546	3	3	1	0.25	1
	group_17806	intQ	Putative defective protein IntQ	26	3	167	84	13.4715	96.5517	4.35928	0.0102832	1	0.387546	3	3	1	0.25	1
	group_17807		hypothetical protein	26	3	167	84	13.4715	96.5517	4.35928	0.0102832	1	0.387546	3	3	1	0.25	1
	group_4757		hypothetical protein	26	3	167	84	13.4715	96.5517	4.35928	0.0102832	1	0.387546	22	19	3	0.000855446	0.000855446
	cirA_4		Colicin I receptor	26	3	167	84	13.4715	96.5517	4.35928	0.0102832	1	0.387546	6	5	2	0.21875	0.6875
	group_8820		putative type I restriction enzymeP M protein	26	3	167	84	13.4715	96.5517	4.35928	0.0102832	1	0.387546	3	3	1	0.25	1
	group_9174		hypothetical protein	26	3	167	84	13.4715	96.5517	4.35928	0.0102832	1	0.387546	4	4	1	0.125	0.625
	aaeA_3		p-hydroxybenzoic acid efflux pump subunit AaeA	189	79	4	8	97.9275	9.1954	4.78481	0.0103708	1	0.387546	4	3	2	0.625	1
	group_10339		hypothetical protein	189	79	4	8	97.9275	9.1954	4.78481	0.0103708	1	0.387546	4	3	2	0.625	1
	hflK_2		Modulator of FtsH protease HflK	189	79	4	8	97.9275	9.1954	4.78481	0.0103708	1	0.387546	4	3	2	0.625	1
	group_14487		hypothetical protein	189	79	4	8	97.9275	9.1954	4.78481	0.0103708	1	0.387546	4	3	2	0.625	1
	group_14489		putative protein	189	79	4	8	97.9275	9.1954	4.78481	0.0103708	1	0.387546	4	3	2	0.625	1
	group_14490		hypothetical protein	189	79	4	8	97.9275	9.1954	4.78481	0.0103708	1	0.387546	4	3	2	0.625	1
	catC		Muconolactone Delta-isomerase	189	79	4	8	97.9275	9.1954	4.78481	0.0103708	1	0.387546	4	3	2	0.625	1
	antC		Anthranilate 1,2-dioxygenase electron transfer component	189	79	4	8	97.9275	9.1954	4.78481	0.0103708	1	0.387546	4	3	2	0.625	1
	lgrE_1		Linear gramicidin dehydrogenase LgrE	189	79	4	8	97.9275	9.1954	4.78481	0.0103708	1	0.387546	4	3	2	0.625	1
	group_5201		hypothetical protein	189	79	4	8	97.9275	9.1954	4.78481	0.0103708	1	0.387546	4	3	2	0.625	1
	aaeX_3		Protein AaeX	189	79	4	8	97.9275	9.1954	4.78481	0.0103708	1	0.387546	4	3	2	0.625	1
	azoR1_1		FMN-dependent NADH-azoreductase 1	189	79	4	8	97.9275	9.1954	4.78481	0.0103708	1	0.387546	4	3	2	0.625	1
	group_6005		hypothetical protein	189	79	4	8	97.9275	9.1954	4.78481	0.0103708	1	0.387546	4	3	2	0.625	1
	group_6278		hypothetical protein	189	79	4	8	97.9275	9.1954	4.78481	0.0103708	1	0.387546	4	3	2	0.625	1
	group_6279		hypothetical protein	189	79	4	8	97.9275	9.1954	4.78481	0.0103708	1	0.387546	4	3	2	0.625	1
	group_6567		hypothetical protein	189	79	4	8	97.9275	9.1954	4.78481	0.0103708	1	0.387546	4	3	2	0.625	1
	group_7468		putative methyltransferase	189	79	4	8	97.9275	9.1954	4.78481	0.0103708	1	0.387546	4	3	2	0.625	1
	dmlR_17		HTH-type transcriptional regulator DmlR	189	79	4	8	97.9275	9.1954	4.78481	0.0103708	1	0.387546	4	3	2	0.625	1
	rhaS_1		HTH-type transcriptional activator RhaS	189	79	4	8	97.9275	9.1954	4.78481	0.0103708	1	0.387546	4	3	2	0.625	1
	group_9721		hypothetical protein	189	79	4	8	97.9275	9.1954	4.78481	0.0103708	1	0.387546	4	3	2	0.625	1
	group_10288		hypothetical protein	4	8	189	79	2.07254	90.8046	0.208995	0.0103708	1	0.387546	8	4	6	0.289062	1
	group_12923	nemA_2	N-ethylmaleimide reductase	4	8	189	79	2.07254	90.8046	0.208995	0.0103708	1	0.387546	9	4	6	0.507812	1
	group_21955		hypothetical protein	4	8	189	79	2.07254	90.8046	0.208995	0.0103708	1	0.387546	9	4	6	0.507812	1
	group_2294		hypothetical protein	4	8	189	79	2.07254	90.8046	0.208995	0.0103708	1	0.387546	9	4	7	0.179688	1
	group_5255	atsA_2	Arylsulfatase	4	8	189	79	2.07254	90.8046	0.208995	0.0103708	1	0.387546	4	2	3	0.625	1
	group_8565		hypothetical protein	4	8	189	79	2.07254	90.8046	0.208995	0.0103708	1	0.387546	3	1	3	0.25	1
	group_3489		hypothetical protein	22	2	171	85	11.399	97.7011	5.46784	0.0104919	1	0.387546	14	13	2	0.00183106	0.0129395
	group_425		hypothetical protein	22	2	171	85	11.399	97.7011	5.46784	0.0104919	1	0.387546	4	3	2	0.625	1
	group_1021		hypothetical protein	21	20	172	67	10.8808	77.0115	0.409012	0.010529	1	0.387546	34	18	19	0.607591	0.864166
	group_543	cph2_3	putative signaling protein	14	16	179	71	7.25389	81.6092	0.347067	0.0108432	1	0.387546	17	10	9	0.629059	1
	group_16381		hypothetical protein	13	0	180	87	6.73575	100	inf	0.0112816	1	0.387546	11	11	0	0.000976563	0.000976563
	group_4561		hypothetical protein	13	0	180	87	6.73575	100	inf	0.0112816	1	0.387546	5	5	0	0.0625	0.0625
	group_27941		hypothetical protein	153	56	40	31	79.2746	35.6322	2.11741	0.0112957	1	0.387546	25	14	19	0.0146333	0.690038
	fliC		A-type flagellin	85	24	108	63	44.0415	72.4138	2.06597	0.0116297	1	0.387546	24	20	13	0.00154388	0.83882
	group_10184		hypothetical protein	190	80	3	7	98.4456	8.04598	5.54167	0.0116444	1	0.387546	2	2	1	0.5	1
	group_10186		hypothetical protein	190	80	3	7	98.4456	8.04598	5.54167	0.0116444	1	0.387546	2	2	1	0.5	1
	group_10197		hypothetical protein	190	80	3	7	98.4456	8.04598	5.54167	0.0116444	1	0.387546	2	2	1	0.5	1
	mcpQ_1		Methyl-accepting chemotaxis protein McpQ	190	80	3	7	98.4456	8.04598	5.54167	0.0116444	1	0.387546	2	2	1	0.5	1
	group_10225		hypothetical protein	190	80	3	7	98.4456	8.04598	5.54167	0.0116444	1	0.387546	2	2	1	0.5	1
	soxR_1		Redox-sensitive transcriptional activator SoxR	190	80	3	7	98.4456	8.04598	5.54167	0.0116444	1	0.387546	2	2	1	0.5	1
	rnfE		Electron transport complex subunit RnfE	190	80	3	7	98.4456	8.04598	5.54167	0.0116444	1	0.387546	2	2	1	0.5	1
	yncB		Endonuclease YncB	190	80	3	7	98.4456	8.04598	5.54167	0.0116444	1	0.387546	2	2	1	0.5	1
	rodZ		Cytoskeleton protein RodZ	190	80	3	7	98.4456	8.04598	5.54167	0.0116444	1	0.387546	2	2	1	0.5	1
	ptsI_2		Phosphoenolpyruvate-protein phosphotransferase	190	80	3	7	98.4456	8.04598	5.54167	0.0116444	1	0.387546	2	2	1	0.5	1
	rsxD		Electron transport complex subunit RsxD	190	80	3	7	98.4456	8.04598	5.54167	0.0116444	1	0.387546	2	2	1	0.5	1
	rsxG		Electron transport complex subunit RsxG	190	80	3	7	98.4456	8.04598	5.54167	0.0116444	1	0.387546	2	2	1	0.5	1
	bepE_1		Efflux pump membrane transporter BepE	190	80	3	7	98.4456	8.04598	5.54167	0.0116444	1	0.387546	2	2	1	0.5	1
	sufS_1		Cysteine desulfurase SufS	190	80	3	7	98.4456	8.04598	5.54167	0.0116444	1	0.387546	2	2	1	0.5	1
	group_13946		hypothetical protein	190	80	3	7	98.4456	8.04598	5.54167	0.0116444	1	0.387546	2	2	1	0.5	1
	group_13950		hypothetical protein	190	80	3	7	98.4456	8.04598	5.54167	0.0116444	1	0.387546	2	2	1	0.5	1
	zntR		HTH-type transcriptional regulator ZntR	190	80	3	7	98.4456	8.04598	5.54167	0.0116444	1	0.387546	2	2	1	0.5	1
	fbp_2		FK506-binding protein	190	80	3	7	98.4456	8.04598	5.54167	0.0116444	1	0.387546	2	2	1	0.5	1
	group_13967		hypothetical protein	190	80	3	7	98.4456	8.04598	5.54167	0.0116444	1	0.387546	2	2	1	0.5	1
	group_13968		hypothetical protein	190	80	3	7	98.4456	8.04598	5.54167	0.0116444	1	0.387546	2	2	1	0.5	1
	ddpX		D-alanyl-D-alanine dipeptidase	190	80	3	7	98.4456	8.04598	5.54167	0.0116444	1	0.387546	2	2	1	0.5	1
	sttH_2		Streptothricin hydrolase	190	80	3	7	98.4456	8.04598	5.54167	0.0116444	1	0.387546	2	2	1	0.5	1
	tas_1		Protein tas	190	80	3	7	98.4456	8.04598	5.54167	0.0116444	1	0.387546	2	2	1	0.5	1
	ycf3		Photosystem I assembly protein Ycf3	190	80	3	7	98.4456	8.04598	5.54167	0.0116444	1	0.387546	2	2	1	0.5	1
	fdx_1		2Fe-2S ferredoxin	190	80	3	7	98.4456	8.04598	5.54167	0.0116444	1	0.387546	2	2	1	0.5	1
	group_14409		hypothetical protein	190	80	3	7	98.4456	8.04598	5.54167	0.0116444	1	0.387546	2	2	1	0.5	1
	hutI		Imidazolonepropionase	190	80	3	7	98.4456	8.04598	5.54167	0.0116444	1	0.387546	2	2	1	0.5	1
	hutH_1		Histidine ammonia-lyase	190	80	3	7	98.4456	8.04598	5.54167	0.0116444	1	0.387546	2	2	1	0.5	1
	ousX_1		Glycine betaine-binding periplasmic protein OusX	190	80	3	7	98.4456	8.04598	5.54167	0.0116444	1	0.387546	2	2	1	0.5	1
	group_14527	metR_3	HTH-type transcriptional regulator MetR	190	80	3	7	98.4456	8.04598	5.54167	0.0116444	1	0.387546	4	3	3	0.625	0.625
	fecR_6		Protein FecR	190	80	3	7	98.4456	8.04598	5.54167	0.0116444	1	0.387546	2	2	1	0.5	1
	lpxK		Tetraacyldisaccharide 4'-kinase	190	80	3	7	98.4456	8.04598	5.54167	0.0116444	1	0.387546	2	2	1	0.5	1
	group_15267		hypothetical protein	190	80	3	7	98.4456	8.04598	5.54167	0.0116444	1	0.387546	2	2	1	0.5	1
	group_1647		Cardiolipin synthase	190	80	3	7	98.4456	8.04598	5.54167	0.0116444	1	0.387546	2	2	1	0.5	1
	ousX_2		Glycine betaine-binding periplasmic protein OusX	190	80	3	7	98.4456	8.04598	5.54167	0.0116444	1	0.387546	2	2	1	0.5	1
	group_2921		hypothetical protein	190	80	3	7	98.4456	8.04598	5.54167	0.0116444	1	0.387546	2	2	1	0.5	1
	group_3182		hypothetical protein	190	80	3	7	98.4456	8.04598	5.54167	0.0116444	1	0.387546	2	2	1	0.5	1
	lytH		L-Ala--D-Glu endopeptidase	190	80	3	7	98.4456	8.04598	5.54167	0.0116444	1	0.387546	2	2	1	0.5	1
	glpT_2		Glycerol-3-phosphate transporter	190	80	3	7	98.4456	8.04598	5.54167	0.0116444	1	0.387546	2	2	1	0.5	1
	panM_1		PanD regulatory factor	190	80	3	7	98.4456	8.04598	5.54167	0.0116444	1	0.387546	2	2	1	0.5	1
	gabD		Succinate-semialdehyde dehydrogenase [NADP(+)]	190	80	3	7	98.4456	8.04598	5.54167	0.0116444	1	0.387546	2	2	1	0.5	1
	group_3774		hypothetical protein	190	80	3	7	98.4456	8.04598	5.54167	0.0116444	1	0.387546	2	2	1	0.5	1
	group_4343		hypothetical protein	190	80	3	7	98.4456	8.04598	5.54167	0.0116444	1	0.387546	2	2	1	0.5	1
	group_4446		hypothetical protein	190	80	3	7	98.4456	8.04598	5.54167	0.0116444	1	0.387546	2	2	1	0.5	1
	group_4537		hypothetical protein	190	80	3	7	98.4456	8.04598	5.54167	0.0116444	1	0.387546	2	2	1	0.5	1
	group_5007		hypothetical protein	190	80	3	7	98.4456	8.04598	5.54167	0.0116444	1	0.387546	2	2	1	0.5	1
	group_5090		hypothetical protein	190	80	3	7	98.4456	8.04598	5.54167	0.0116444	1	0.387546	2	2	1	0.5	1
	group_5174		hypothetical protein	190	80	3	7	98.4456	8.04598	5.54167	0.0116444	1	0.387546	2	2	1	0.5	1
	lhgO		L-2-hydroxyglutarate oxidase LhgO	190	80	3	7	98.4456	8.04598	5.54167	0.0116444	1	0.387546	2	2	1	0.5	1
	fecI_15		hypothetical protein	190	80	3	7	98.4456	8.04598	5.54167	0.0116444	1	0.387546	2	2	1	0.5	1
	ybhF_2		putative multidrug ABC transporter ATP-binding protein YbhF	190	80	3	7	98.4456	8.04598	5.54167	0.0116444	1	0.387546	2	2	1	0.5	1
	group_5994		hypothetical protein	190	80	3	7	98.4456	8.04598	5.54167	0.0116444	1	0.387546	2	2	1	0.5	1
	group_6093		hypothetical protein	190	80	3	7	98.4456	8.04598	5.54167	0.0116444	1	0.387546	2	2	1	0.5	1
	group_6247		hypothetical protein	190	80	3	7	98.4456	8.04598	5.54167	0.0116444	1	0.387546	2	2	1	0.5	1
	group_6468		hypothetical protein	190	80	3	7	98.4456	8.04598	5.54167	0.0116444	1	0.387546	2	2	1	0.5	1
	group_6479		hypothetical protein	190	80	3	7	98.4456	8.04598	5.54167	0.0116444	1	0.387546	2	2	1	0.5	1
	group_6672		hypothetical protein	190	80	3	7	98.4456	8.04598	5.54167	0.0116444	1	0.387546	2	2	1	0.5	1
	group_6879		hypothetical protein	190	80	3	7	98.4456	8.04598	5.54167	0.0116444	1	0.387546	2	2	1	0.5	1
	group_7436		hypothetical protein	190	80	3	7	98.4456	8.04598	5.54167	0.0116444	1	0.387546	2	2	1	0.5	1
	rsmJ		Ribosomal RNA small subunit methyltransferase J	190	80	3	7	98.4456	8.04598	5.54167	0.0116444	1	0.387546	2	2	1	0.5	1
	group_7446		hypothetical protein	190	80	3	7	98.4456	8.04598	5.54167	0.0116444	1	0.387546	2	2	1	0.5	1
	glmS_1		Glutamine--fructose-6-phosphate aminotransferase [isomerizing]	190	80	3	7	98.4456	8.04598	5.54167	0.0116444	1	0.387546	2	2	1	0.5	1
	nagE		PTS system N-acetylglucosamine-specific EIICBA component	190	80	3	7	98.4456	8.04598	5.54167	0.0116444	1	0.387546	2	2	1	0.5	1
	hldD		ADP-L-glycero-D-manno-heptose-6-epimerase	190	80	3	7	98.4456	8.04598	5.54167	0.0116444	1	0.387546	2	2	1	0.5	1
	group_7828		hypothetical protein	190	80	3	7	98.4456	8.04598	5.54167	0.0116444	1	0.387546	2	2	1	0.5	1
	group_7913		hypothetical protein	190	80	3	7	98.4456	8.04598	5.54167	0.0116444	1	0.387546	2	2	1	0.5	1
	group_7953		hypothetical protein	190	80	3	7	98.4456	8.04598	5.54167	0.0116444	1	0.387546	2	2	1	0.5	1
	group_7956		hypothetical protein	190	80	3	7	98.4456	8.04598	5.54167	0.0116444	1	0.387546	2	2	1	0.5	1
	rsmD		Ribosomal RNA small subunit methyltransferase D	190	80	3	7	98.4456	8.04598	5.54167	0.0116444	1	0.387546	2	2	1	0.5	1
	rsxC		Electron transport complex subunit RsxC	190	80	3	7	98.4456	8.04598	5.54167	0.0116444	1	0.387546	2	2	1	0.5	1
	group_9672		hypothetical protein	190	80	3	7	98.4456	8.04598	5.54167	0.0116444	1	0.387546	2	2	1	0.5	1
	tsaB		tRNA threonylcarbamoyladenosine biosynthesis protein TsaB	190	80	3	7	98.4456	8.04598	5.54167	0.0116444	1	0.387546	2	2	1	0.5	1
	group_9701		hypothetical protein	190	80	3	7	98.4456	8.04598	5.54167	0.0116444	1	0.387546	2	2	1	0.5	1
	group_11689	crt_5	Short-chain-enoyl-CoA hydratase	3	7	190	80	1.5544	91.954	0.180451	0.0116444	1	0.387546	2	1	2	0.5	1
	group_16543	nodD2_1	Nodulation protein D 2	3	7	190	80	1.5544	91.954	0.180451	0.0116444	1	0.387546	2	1	2	0.5	1
	group_4016	marA_1	Multiple antibiotic resistance protein MarA	3	7	190	80	1.5544	91.954	0.180451	0.0116444	1	0.387546	2	1	2	0.5	1
	group_5160	mgtB	Magnesium-transporting ATPase, P-type 1	3	7	190	80	1.5544	91.954	0.180451	0.0116444	1	0.387546	2	1	2	0.5	1
	cysM_2		Cysteine synthase B	3	7	190	80	1.5544	91.954	0.180451	0.0116444	1	0.387546	2	1	2	0.5	1
	group_6880		hypothetical protein	3	7	190	80	1.5544	91.954	0.180451	0.0116444	1	0.387546	2	1	2	0.5	1
	msbA_1		Lipid A export ATP-binding/permease protein MsbA	3	7	190	80	1.5544	91.954	0.180451	0.0116444	1	0.387546	2	1	2	0.5	1
	lgrD_2		Linear gramicidin synthase subunit D	175	69	18	18	90.6736	20.6897	2.53623	0.0118266	1	0.387546	19	12	11	0.359283	0.647606
	gno_1		Gluconate 5-dehydrogenase	84	24	109	63	43.5233	72.4138	2.02294	0.0119253	1	0.387546	21	17	11	0.00719738	1
	cc4_3		Cytochrome c4	192	82	1	5	99.4819	5.74713	11.7073	0.0120417	1	0.387546	6	5	1	0.21875	0.21875
	group_16318		hypothetical protein	1	5	192	82	0.518135	94.2529	0.0854167	0.0120417	1	0.387546	2	1	2	0.5	1
	group_16504		hypothetical protein	1	5	192	82	0.518135	94.2529	0.0854167	0.0120417	1	0.387546	4	1	4	0.125	0.625
	group_8738		hypothetical protein	1	5	192	82	0.518135	94.2529	0.0854167	0.0120417	1	0.387546	2	1	2	0.5	1
	group_11931		hypothetical protein	51	11	142	76	26.4249	87.3563	2.48143	0.0123482	1	0.387546	24	17	9	0.0639147	0.307456
	group_3379		hypothetical protein	141	50	52	37	73.057	42.5287	2.00654	0.0124028	1	0.387546	34	14	23	0.0576127	0.391528
	group_2485		hypothetical protein	191	81	2	6	98.9637	6.89655	7.07407	0.0124458	1	0.387546	3	3	1	0.25	1
	group_13623		putative oxidoreductase	2	6	191	81	1.03627	93.1034	0.141361	0.0124458	1	0.387546	5	2	4	0.375	1
	group_28105		hypothetical protein	2	6	191	81	1.03627	93.1034	0.141361	0.0124458	1	0.387546	5	2	4	0.375	1
	ycjY		putative protein YcjY	2	6	191	81	1.03627	93.1034	0.141361	0.0124458	1	0.387546	5	2	4	0.375	1
	clpB_1		Chaperone protein ClpB	123	41	70	46	63.7306	52.8736	1.97143	0.0125245	1	0.387546	34	15	27	0.000821395	0.607591
	group_6146	clpB_2	Chaperone protein ClpB	70	46	123	41	36.2694	47.1264	0.507246	0.0125245	1	0.387546	34	27	15	0.000821395	0.607591
	group_6771		hypothetical protein	86	25	107	62	44.5596	71.2644	1.99327	0.012545	1	0.387546	37	24	21	0.0988717	0.511376
	group_5568		hypothetical protein	15	16	178	71	7.77202	81.6092	0.373947	0.0128276	1	0.387546	21	9	15	0.0783539	0.663624
	group_5452		hypothetical protein	72	19	121	68	37.3057	78.1609	2.12962	0.0128349	1	0.387546	23	15	10	0.21004	0.677639
	group_18053		hypothetical protein	32	5	161	82	16.5803	94.2529	3.25963	0.0129158	1	0.387546	10	7	5	0.34375	1
	group_18054		hypothetical protein	32	5	161	82	16.5803	94.2529	3.25963	0.0129158	1	0.387546	10	7	5	0.34375	1
	yxbC		putative protein YxbC	32	5	161	82	16.5803	94.2529	3.25963	0.0129158	1	0.387546	10	7	5	0.34375	1
	group_18056		hypothetical protein	32	5	161	82	16.5803	94.2529	3.25963	0.0129158	1	0.387546	10	7	5	0.34375	1
	group_1751		hypothetical protein	44	9	149	78	22.7979	89.6552	2.55928	0.0135686	1	0.387546	26	21	7	0.00249392	0.0289593
	group_545		hypothetical protein	44	9	149	78	22.7979	89.6552	2.55928	0.0135686	1	0.387546	13	10	7	0.0922852	1
	group_4021	epsF_1	Type II secretion system protein F	114	37	79	50	59.0674	57.4713	1.95005	0.0136351	1	0.387546	22	15	17	0.0169005	0.133801
	yofA_4		HTH-type transcriptional regulator YofA	188	78	5	9	97.4093	10.3448	4.33846	0.0136671	1	0.387546	6	4	3	0.6875	1
	paaF_1		2,3-dehydroadipyl-CoA hydratase	188	78	5	9	97.4093	10.3448	4.33846	0.0136671	1	0.387546	6	4	3	0.6875	1
	group_3342		hypothetical protein	188	78	5	9	97.4093	10.3448	4.33846	0.0136671	1	0.387546	6	4	3	0.6875	1
	guaD_3		Guanine deaminase	188	78	5	9	97.4093	10.3448	4.33846	0.0136671	1	0.387546	6	4	3	0.6875	1
	group_6227	nicP_1	Porin-like protein NicP	188	78	5	9	97.4093	10.3448	4.33846	0.0136671	1	0.387546	5	4	3	0.375	1
	group_8244		hypothetical protein	188	78	5	9	97.4093	10.3448	4.33846	0.0136671	1	0.387546	6	4	3	0.6875	1
	group_6008	oprM_2	Outer membrane protein OprM	5	9	188	78	2.59067	89.6552	0.230496	0.0136671	1	0.387546	6	3	4	0.6875	1
	group_9310		hypothetical protein	5	9	188	78	2.59067	89.6552	0.230496	0.0136671	1	0.387546	11	5	7	0.548828	1
	group_12151	hcaR_2	Hca operon transcriptional activator HcaR	38	7	155	80	19.6891	91.954	2.80184	0.0138376	1	0.387546	22	19	5	0.000855446	0.0169005
	group_2206		hypothetical protein	38	7	155	80	19.6891	91.954	2.80184	0.0138376	1	0.387546	21	18	5	0.00148964	0.0266037
	group_2873		hypothetical protein	38	7	155	80	19.6891	91.954	2.80184	0.0138376	1	0.387546	21	18	6	0.00148964	0.0783539
	degP_2		Periplasmic serine endoprotease DegP	38	7	155	80	19.6891	91.954	2.80184	0.0138376	1	0.387546	22	19	5	0.000855446	0.0169005
	group_2562		Insertion sequence IS5376 putative ATP-binding protein	39	7	154	80	20.2073	91.954	2.89425	0.0138622	1	0.387546	16	11	7	0.210114	0.803619
	group_3272		hypothetical protein	39	7	154	80	20.2073	91.954	2.89425	0.0138622	1	0.387546	25	18	7	0.0432853	0.0432853
	group_8918		hypothetical protein	39	7	154	80	20.2073	91.954	2.89425	0.0138622	1	0.387546	22	19	5	0.000855446	0.0169005
	group_5988	agaA	N-acetylgalactosamine-6-phosphate deacetylase	84	52	109	35	43.5233	40.2299	0.518701	0.0140865	1	0.387546	32	18	22	0.0501025	0.596615
	group_12149	hcaR_2	Hca operon transcriptional activator HcaR	28	4	165	83	14.5078	95.4023	3.52121	0.0148912	1	0.387546	17	14	4	0.0127258	0.0490417
	aldA		hypothetical protein	28	4	165	83	14.5078	95.4023	3.52121	0.0148912	1	0.387546	4	4	2	0.125	1
	group_12548		putative protein	29	4	164	83	15.0259	95.4023	3.66921	0.0149594	1	0.387546	7	6	2	0.125	0.453125
	group_12549		hypothetical protein	29	4	164	83	15.0259	95.4023	3.66921	0.0149594	1	0.387546	7	6	2	0.125	0.453125
	group_20641		hypothetical protein	29	4	164	83	15.0259	95.4023	3.66921	0.0149594	1	0.387546	7	6	2	0.125	0.453125
	group_20644		hypothetical protein	29	4	164	83	15.0259	95.4023	3.66921	0.0149594	1	0.387546	7	6	2	0.125	0.453125
	group_5456		hypothetical protein	29	4	164	83	15.0259	95.4023	3.66921	0.0149594	1	0.387546	6	5	2	0.21875	0.6875
	aprA_1		Adenylylsulfate reductase subunit alpha	186	77	7	10	96.3731	11.4943	3.45083	0.0151407	1	0.387546	8	5	5	0.726562	0.726562
	yvoA_2		HTH-type transcriptional repressor YvoA	186	77	7	10	96.3731	11.4943	3.45083	0.0151407	1	0.387546	8	5	5	0.726562	0.726562
	aprB		Adenylylsulfate reductase subunit beta	186	77	7	10	96.3731	11.4943	3.45083	0.0151407	1	0.387546	8	5	5	0.726562	0.726562
	group_2274		hypothetical protein	186	77	7	10	96.3731	11.4943	3.45083	0.0151407	1	0.387546	8	5	5	0.726562	0.726562
	group_2705		hypothetical protein	186	77	7	10	96.3731	11.4943	3.45083	0.0151407	1	0.387546	8	5	5	0.726562	0.726562
	group_3154	oprD_8	Porin D	186	77	7	10	96.3731	11.4943	3.45083	0.0151407	1	0.387546	9	5	5	1	1
	group_1869	recD_2	RecBCD enzyme subunit RecD	7	10	186	77	3.62694	88.5057	0.289785	0.0151407	1	0.387546	16	7	9	0.803619	0.803619
	pilT_1		Twitching mobility protein	78	22	115	65	40.4145	74.7126	2.00395	0.0154967	1	0.387546	33	21	16	0.162756	1
	group_814		hypothetical protein	46	10	147	77	23.8342	88.5057	2.40952	0.0160863	1	0.387546	16	11	6	0.210114	0.454498
	group_1949	hcpC_1	Putative beta-lactamase HcpC	80	23	113	64	41.4508	73.5632	1.96999	0.0164042	1	0.387546	28	19	15	0.0871586	0.850554
	group_5551		hypothetical protein	80	23	113	64	41.4508	73.5632	1.96999	0.0164042	1	0.387546	31	21	15	0.0707555	1
	group_11872		hypothetical protein	25	3	168	84	12.9534	96.5517	4.16667	0.0164074	1	0.387546	4	3	2	0.625	1
	group_17804		hypothetical protein	25	3	168	84	12.9534	96.5517	4.16667	0.0164074	1	0.387546	2	2	1	0.5	1
	group_20648		hypothetical protein	25	3	168	84	12.9534	96.5517	4.16667	0.0164074	1	0.387546	4	3	2	0.625	1
	bicA_3		Bicarbonate transporter BicA	25	3	168	84	12.9534	96.5517	4.16667	0.0164074	1	0.387546	2	2	1	0.5	1
	group_32288		hypothetical protein	25	3	168	84	12.9534	96.5517	4.16667	0.0164074	1	0.387546	2	2	1	0.5	1
	group_9179		hypothetical protein	25	3	168	84	12.9534	96.5517	4.16667	0.0164074	1	0.387546	8	6	2	0.289062	0.289062
	group_1993	hin_1	DNA-invertase hin	24	3	169	84	12.4352	96.5517	3.97633	0.0165941	1	0.387546	3	3	1	0.25	1
	group_20677		hypothetical protein	24	3	169	84	12.4352	96.5517	3.97633	0.0165941	1	0.387546	2	2	1	0.5	1
	group_2177		hypothetical protein	24	3	169	84	12.4352	96.5517	3.97633	0.0165941	1	0.387546	3	3	1	0.25	1
	group_32879		hypothetical protein	24	3	169	84	12.4352	96.5517	3.97633	0.0165941	1	0.387546	11	8	3	0.226562	0.226562
	appA_3		Oligopeptide-binding protein AppA	24	3	169	84	12.4352	96.5517	3.97633	0.0165941	1	0.387546	4	3	2	0.625	1
	group_6596	yejE_2	Inner membrane ABC transporter permease protein YejE	24	3	169	84	12.4352	96.5517	3.97633	0.0165941	1	0.387546	8	5	3	0.726562	0.726562
	group_673		hypothetical protein	24	3	169	84	12.4352	96.5517	3.97633	0.0165941	1	0.387546	3	3	1	0.25	1
	group_7069		hypothetical protein	24	3	169	84	12.4352	96.5517	3.97633	0.0165941	1	0.387546	2	2	1	0.5	1
	group_9202		hypothetical protein	24	3	169	84	12.4352	96.5517	3.97633	0.0165941	1	0.387546	17	16	2	0.000274658	0.00234985
	group_3475	clpC_2	ATP-dependent Clp protease ATP-binding subunit ClpC	35	6	158	81	18.1347	93.1034	2.99051	0.0166367	1	0.387546	22	17	5	0.0169005	0.0169005
	group_4832		hypothetical protein	35	6	158	81	18.1347	93.1034	2.99051	0.0166367	1	0.387546	15	12	4	0.0351562	0.118469
	frmR		Transcriptional repressor FrmR	35	6	158	81	18.1347	93.1034	2.99051	0.0166367	1	0.387546	24	21	6	0.000277162	0.0226558
	fabG_12		3-oxoacyl-[acyl-carrier-protein] reductase FabG	17	17	176	70	8.80829	80.4598	0.397727	0.0166408	1	0.387546	17	11	10	0.332306	0.629059
	group_4823		hypothetical protein	41	8	152	79	21.2435	90.8046	2.66365	0.0166688	1	0.387546	23	20	6	0.000488281	0.0346897
	group_12115		hypothetical protein	34	6	159	81	17.6166	93.1034	2.88679	0.0168318	1	0.387546	14	11	4	0.057373	0.179565
	group_4833		hypothetical protein	34	6	159	81	17.6166	93.1034	2.88679	0.0168318	1	0.387546	14	11	4	0.057373	0.179565
	group_5830		hypothetical protein	34	6	159	81	17.6166	93.1034	2.88679	0.0168318	1	0.387546	14	11	4	0.057373	0.179565
	algA_2		Alginate biosynthesis protein AlgA	185	76	8	11	95.8549	12.6437	3.34704	0.0178754	1	0.387546	14	9	8	0.42395	0.790527
	group_15645		hypothetical protein	89	27	104	60	46.114	68.9655	1.90171	0.0187588	1	0.387546	20	17	12	0.00257683	0.503445
	phzB1		Phenazine biosynthesis protein PhzB1	97	30	96	57	50.2591	65.5172	1.91979	0.0192939	1	0.387546	44	28	23	0.0961418	0.880396
	oprJ_2		hypothetical protein	97	30	96	57	50.2591	65.5172	1.91979	0.0192939	1	0.387546	28	13	19	0.0871586	0.850554
	group_4533		hypothetical protein	120	41	73	46	62.1762	52.8736	1.8443	0.0194466	1	0.387546	29	16	20	0.0614283	0.711071
	group_11781		hypothetical protein	59	15	134	72	30.5699	82.7586	2.11343	0.0196015	1	0.387546	25	19	12	0.0146333	1
	group_7045	soj_1	Sporulation initiation inhibitor protein Soj	31	5	162	82	16.0622	94.2529	3.13827	0.0196378	1	0.387546	16	14	5	0.00418091	0.210114
	group_7073		hypothetical protein	31	5	162	82	16.0622	94.2529	3.13827	0.0196378	1	0.387546	10	8	3	0.109375	0.34375
	group_9046		hypothetical protein	43	9	150	78	22.2798	89.6552	2.48444	0.0196754	1	0.387546	18	11	8	0.480682	0.814529
	epsG		Type II secretion system protein G	165	64	28	23	85.4922	26.4368	2.11775	0.0196955	1	0.387546	17	10	14	0.0127258	0.629059
	group_3649		hypothetical protein	165	64	28	23	85.4922	26.4368	2.11775	0.0196955	1	0.387546	17	10	14	0.0127258	0.629059
	group_4297	zraR_5	Transcriptional regulatory protein ZraR	165	64	28	23	85.4922	26.4368	2.11775	0.0196955	1	0.387546	17	10	14	0.0127258	0.629059
	group_5111		hypothetical protein	165	64	28	23	85.4922	26.4368	2.11775	0.0196955	1	0.387546	17	10	14	0.0127258	0.629059
	group_7645		hypothetical protein	165	64	28	23	85.4922	26.4368	2.11775	0.0196955	1	0.387546	17	10	14	0.0127258	0.629059
	fimA		Fimbrial protein	165	64	28	23	85.4922	26.4368	2.11775	0.0196955	1	0.387546	17	10	14	0.0127258	0.629059
	group_9999		hypothetical protein	165	64	28	23	85.4922	26.4368	2.11775	0.0196955	1	0.387546	17	10	14	0.0127258	0.629059
	group_1189	phoA2	Alkaline phosphatase L	6	9	187	78	3.10881	89.6552	0.278075	0.0198063	1	0.387546	5	4	3	0.375	1
	group_15349		hypothetical protein	6	9	187	78	3.10881	89.6552	0.278075	0.0198063	1	0.387546	13	5	9	0.266846	0.581055
	group_1537		hypothetical protein	6	9	187	78	3.10881	89.6552	0.278075	0.0198063	1	0.387546	8	5	4	0.726562	1
	group_6390		hypothetical protein	6	9	187	78	3.10881	89.6552	0.278075	0.0198063	1	0.387546	6	3	4	0.6875	1
	group_10377		hypothetical protein	187	78	6	9	96.8912	10.3448	3.59615	0.0198063	1	0.387546	6	4	4	0.6875	0.6875
	group_10378		hypothetical protein	187	78	6	9	96.8912	10.3448	3.59615	0.0198063	1	0.387546	6	4	4	0.6875	0.6875
	group_10533		hypothetical protein	187	78	6	9	96.8912	10.3448	3.59615	0.0198063	1	0.387546	6	3	4	0.6875	1
	pchR_1		Regulatory protein PchR	187	78	6	9	96.8912	10.3448	3.59615	0.0198063	1	0.387546	5	4	4	0.375	0.375
	estB_2		Esterase EstB	187	78	6	9	96.8912	10.3448	3.59615	0.0198063	1	0.387546	6	4	4	0.6875	0.6875
	fhuA_4		Ferrichrome outer membrane transporter/phage receptor	187	78	6	9	96.8912	10.3448	3.59615	0.0198063	1	0.387546	10	7	4	0.34375	0.753906
	arnT_1		Undecaprenyl phosphate-alpha-4-amino-4-deoxy-L-arabinose arabinosyl transferase	187	78	6	9	96.8912	10.3448	3.59615	0.0198063	1	0.387546	7	4	4	1	1
	group_5995		hypothetical protein	187	78	6	9	96.8912	10.3448	3.59615	0.0198063	1	0.387546	7	4	4	1	1
	lhpI		Delta(1)-pyrroline-2-carboxylate reductase	187	78	6	9	96.8912	10.3448	3.59615	0.0198063	1	0.387546	2	2	2	0.5	0.5
	group_7887		hypothetical protein	187	78	6	9	96.8912	10.3448	3.59615	0.0198063	1	0.387546	6	4	4	0.6875	0.6875
	group_11072		hypothetical protein	11	0	182	87	5.69948	100	inf	0.0198834	1	0.387546	7	7	0	0.015625	0.015625
	group_11813		hypothetical protein	11	0	182	87	5.69948	100	inf	0.0198834	1	0.387546	5	5	0	0.0625	0.0625
	group_13028		hypothetical protein	11	0	182	87	5.69948	100	inf	0.0198834	1	0.387546	5	5	0	0.0625	0.0625
	xre		HTH-type transcriptional regulator Xre	11	0	182	87	5.69948	100	inf	0.0198834	1	0.387546	9	9	0	0.00390625	0.00390625
	group_22446		hypothetical protein	11	0	182	87	5.69948	100	inf	0.0198834	1	0.387546	7	7	0	0.015625	0.015625
	group_2572		hypothetical protein	11	0	182	87	5.69948	100	inf	0.0198834	1	0.387546	4	4	0	0.125	0.125
	group_5902	intA_2	Prophage integrase IntA	11	0	182	87	5.69948	100	inf	0.0198834	1	0.387546	1	1	0	1	1
	group_9265		hypothetical protein	11	0	182	87	5.69948	100	inf	0.0198834	1	0.387546	9	9	0	0.00390625	0.00390625
	group_2081	phzA2	Phenazine biosynthesis protein PhzA2	29	24	164	63	15.0259	72.4138	0.464177	0.02022	1	0.387546	34	19	19	0.607591	0.607591
	group_2334		hypothetical protein	51	12	142	75	26.4249	86.2069	2.24472	0.0204336	1	0.387546	18	14	7	0.0308838	0.480682
	group_12150		hypothetical protein	37	7	156	80	19.171	91.954	2.71062	0.0204402	1	0.387546	21	18	5	0.00148964	0.0266037
	group_4010		hypothetical protein	52	12	141	75	26.943	86.2069	2.30496	0.0204474	1	0.387546	32	26	9	0.000535053	0.0200616
	group_5655		hypothetical protein	52	12	141	75	26.943	86.2069	2.30496	0.0204474	1	0.387546	31	26	10	0.000192195	0.0707555
	tcpT		Toxin coregulated pilus biosynthesis protein T	75	21	118	66	38.8601	75.8621	1.99758	0.0204545	1	0.387546	35	23	17	0.0895311	1
	group_13230	hsaC	Iron-dependent extradiol dioxygenase	12	0	181	87	6.21762	100	inf	0.0206756	1	0.387546	4	4	0	0.125	0.125
	yisK		putative protein YisK	12	0	181	87	6.21762	100	inf	0.0206756	1	0.387546	4	4	0	0.125	0.125
	lcfB_2		Long-chain-fatty-acid--CoA ligase	12	0	181	87	6.21762	100	inf	0.0206756	1	0.387546	4	4	0	0.125	0.125
	group_13316		hypothetical protein	12	0	181	87	6.21762	100	inf	0.0206756	1	0.387546	7	7	0	0.015625	0.015625
	group_1349		hypothetical protein	12	0	181	87	6.21762	100	inf	0.0206756	1	0.387546	4	4	0	0.125	0.125
	group_19505		hypothetical protein	12	0	181	87	6.21762	100	inf	0.0206756	1	0.387546	6	6	0	0.03125	0.03125
	mhpA		3-(3-hydroxy-phenyl)propionate/3-hydroxycinnamic acid hydroxylase	12	0	181	87	6.21762	100	inf	0.0206756	1	0.387546	4	4	0	0.125	0.125
	luxR		HTH-type transcriptional regulator LuxR	12	0	181	87	6.21762	100	inf	0.0206756	1	0.387546	4	4	0	0.125	0.125
	group_23874		NADH oxidase	12	0	181	87	6.21762	100	inf	0.0206756	1	0.387546	4	4	0	0.125	0.125
	group_23875		hypothetical protein	12	0	181	87	6.21762	100	inf	0.0206756	1	0.387546	4	4	0	0.125	0.125
	group_8881		hypothetical protein	12	0	181	87	6.21762	100	inf	0.0206756	1	0.387546	8	8	0	0.0078125	0.0078125
	group_977		hypothetical protein	79	23	114	64	40.9326	73.5632	1.9283	0.0225539	1	0.387546	32	21	16	0.110184	1
	group_19426		hypothetical protein	27	4	166	83	13.9896	95.4023	3.375	0.0226895	1	0.387546	17	14	4	0.0127258	0.0490417
	group_3472	merA	Mercuric reductase	45	10	148	77	23.3161	88.5057	2.34122	0.0228537	1	0.387546	19	15	7	0.0192108	0.359283
	group_7730		hypothetical protein	45	10	148	77	23.3161	88.5057	2.34122	0.0228537	1	0.387546	15	12	4	0.0351562	0.118469
	prs		Ribose-phosphate pyrophosphokinase	140	74	53	13	72.5389	14.9425	0.464049	0.0229753	1	0.387546	28	12	21	0.012541	0.571588
	group_5649		hypothetical protein	53	13	140	74	27.4611	85.0575	2.15495	0.0229753	1	0.387546	31	26	10	0.000192195	0.0707555
	tauB_2		Taurine import ATP-binding protein TauB	184	76	9	11	95.3368	12.6437	2.95906	0.0231481	1	0.387546	11	6	7	0.548828	1
	group_11119	dapA_4	4-hydroxy-tetrahydrodipicolinate synthase	82	24	111	63	42.487	72.4138	1.93919	0.0232954	1	0.387546	27	23	12	0.000310749	0.701108
	yadV_6		putative fimbrial chaperone YadV	25	21	168	66	12.9534	75.8621	0.467687	0.0237187	1	0.387546	26	17	14	0.168638	0.845019
	group_18740	intS_1	Prophage integrase IntS	39	8	154	79	20.2073	90.8046	2.50081	0.0245165	1	0.387546	21	18	6	0.00148964	0.0783539
	group_18746		hypothetical protein	39	8	154	79	20.2073	90.8046	2.50081	0.0245165	1	0.387546	21	18	6	0.00148964	0.0783539
	group_18747		hypothetical protein	39	8	154	79	20.2073	90.8046	2.50081	0.0245165	1	0.387546	21	18	6	0.00148964	0.0783539
	group_2390		hypothetical protein	39	8	154	79	20.2073	90.8046	2.50081	0.0245165	1	0.387546	21	18	6	0.00148964	0.0783539
	group_2391		hypothetical protein	39	8	154	79	20.2073	90.8046	2.50081	0.0245165	1	0.387546	21	18	6	0.00148964	0.0783539
	group_3497		hypothetical protein	39	8	154	79	20.2073	90.8046	2.50081	0.0245165	1	0.387546	21	18	6	0.00148964	0.0783539
	group_3499		hypothetical protein	39	8	154	79	20.2073	90.8046	2.50081	0.0245165	1	0.387546	21	18	6	0.00148964	0.0783539
	group_4072		hypothetical protein	39	8	154	79	20.2073	90.8046	2.50081	0.0245165	1	0.387546	21	18	6	0.00148964	0.0783539
	group_4073		hypothetical protein	39	8	154	79	20.2073	90.8046	2.50081	0.0245165	1	0.387546	21	18	6	0.00148964	0.0783539
	topB_1		DNA topoisomerase 3	39	8	154	79	20.2073	90.8046	2.50081	0.0245165	1	0.387546	21	18	6	0.00148964	0.0783539
	group_4095		hypothetical protein	39	8	154	79	20.2073	90.8046	2.50081	0.0245165	1	0.387546	21	18	6	0.00148964	0.0783539
	group_4820		hypothetical protein	39	8	154	79	20.2073	90.8046	2.50081	0.0245165	1	0.387546	21	18	6	0.00148964	0.0783539
	group_4821		hypothetical protein	39	8	154	79	20.2073	90.8046	2.50081	0.0245165	1	0.387546	21	18	6	0.00148964	0.0783539
	group_4822		hypothetical protein	39	8	154	79	20.2073	90.8046	2.50081	0.0245165	1	0.387546	21	18	6	0.00148964	0.0783539
	group_5808		hypothetical protein	39	8	154	79	20.2073	90.8046	2.50081	0.0245165	1	0.387546	21	18	6	0.00148964	0.0783539
	group_7044		hypothetical protein	39	8	154	79	20.2073	90.8046	2.50081	0.0245165	1	0.387546	21	18	6	0.00148964	0.0783539
	group_8923		hypothetical protein	39	8	154	79	20.2073	90.8046	2.50081	0.0245165	1	0.387546	21	18	6	0.00148964	0.0783539
	group_5805		Putative DNA-binding proteinA	33	6	160	81	17.0984	93.1034	2.78437	0.0247786	1	0.387546	15	13	5	0.00738525	0.301758
	group_9024	hcaR_1	Hca operon transcriptional activator HcaR	33	6	160	81	17.0984	93.1034	2.78437	0.0247786	1	0.387546	16	11	6	0.210114	0.454498
	group_12187		hypothetical protein	56	14	137	73	29.0155	83.908	2.13139	0.0249316	1	0.387546	15	12	3	0.0351562	0.0351562
	group_19472		hypothetical protein	56	14	137	73	29.0155	83.908	2.13139	0.0249316	1	0.387546	15	12	3	0.0351562	0.0351562
	group_19473		hypothetical protein	56	14	137	73	29.0155	83.908	2.13139	0.0249316	1	0.387546	15	12	3	0.0351562	0.0351562
	group_19474		hypothetical protein	56	14	137	73	29.0155	83.908	2.13139	0.0249316	1	0.387546	15	12	3	0.0351562	0.0351562
	hin_2		DNA-invertase hin	56	14	137	73	29.0155	83.908	2.13139	0.0249316	1	0.387546	15	12	3	0.0351562	0.0351562
	group_2037		hypothetical protein	56	14	137	73	29.0155	83.908	2.13139	0.0249316	1	0.387546	28	24	11	0.000179991	0.344928
	group_4742		hypothetical protein	56	14	137	73	29.0155	83.908	2.13139	0.0249316	1	0.387546	15	12	3	0.0351562	0.0351562
	group_1353		hypothetical protein	142	52	51	35	73.5751	40.2299	1.87406	0.0250949	1	0.387546	34	15	25	0.00904119	0.607591
	group_12552	xerC_3	hypothetical protein	23	3	170	84	11.9171	96.5517	3.78824	0.0254291	1	0.387546	2	2	1	0.5	1
	group_20485		hypothetical protein	23	3	170	84	11.9171	96.5517	3.78824	0.0254291	1	0.387546	6	3	3	1	1
	group_20640		hypothetical protein	23	3	170	84	11.9171	96.5517	3.78824	0.0254291	1	0.387546	1	1	1	1	1
	group_20642		hypothetical protein	23	3	170	84	11.9171	96.5517	3.78824	0.0254291	1	0.387546	1	1	1	1	1
	group_20643		hypothetical protein	23	3	170	84	11.9171	96.5517	3.78824	0.0254291	1	0.387546	1	1	1	1	1
	group_20649	yiiM_2	Protein YiiM	23	3	170	84	11.9171	96.5517	3.78824	0.0254291	1	0.387546	1	1	1	1	1
	group_20653	recF_3	DNA replication and repair protein RecF	23	3	170	84	11.9171	96.5517	3.78824	0.0254291	1	0.387546	2	2	1	0.5	1
	group_20654		hypothetical protein	23	3	170	84	11.9171	96.5517	3.78824	0.0254291	1	0.387546	2	2	1	0.5	1
	group_20655		hypothetical protein	23	3	170	84	11.9171	96.5517	3.78824	0.0254291	1	0.387546	2	2	1	0.5	1
	group_20656		hypothetical protein	23	3	170	84	11.9171	96.5517	3.78824	0.0254291	1	0.387546	2	2	1	0.5	1
	group_20688		hypothetical protein	23	3	170	84	11.9171	96.5517	3.78824	0.0254291	1	0.387546	1	1	1	1	1
	group_20689		hypothetical protein	23	3	170	84	11.9171	96.5517	3.78824	0.0254291	1	0.387546	1	1	1	1	1
	group_20690		hypothetical protein	23	3	170	84	11.9171	96.5517	3.78824	0.0254291	1	0.387546	1	1	1	1	1
	group_20691		hypothetical protein	23	3	170	84	11.9171	96.5517	3.78824	0.0254291	1	0.387546	1	1	1	1	1
	group_20694		hypothetical protein	23	3	170	84	11.9171	96.5517	3.78824	0.0254291	1	0.387546	1	1	1	1	1
	group_20695		hypothetical protein	23	3	170	84	11.9171	96.5517	3.78824	0.0254291	1	0.387546	1	1	1	1	1
	group_20696	recF_4	DNA replication and repair protein RecF	23	3	170	84	11.9171	96.5517	3.78824	0.0254291	1	0.387546	1	1	1	1	1
	group_20698		hypothetical protein	23	3	170	84	11.9171	96.5517	3.78824	0.0254291	1	0.387546	1	1	1	1	1
	group_20699	ptlG	Type IV secretion system protein PtlG	23	3	170	84	11.9171	96.5517	3.78824	0.0254291	1	0.387546	1	1	1	1	1
	group_20700		hypothetical protein	23	3	170	84	11.9171	96.5517	3.78824	0.0254291	1	0.387546	1	1	1	1	1
	group_20701		hypothetical protein	23	3	170	84	11.9171	96.5517	3.78824	0.0254291	1	0.387546	1	1	1	1	1
	group_20702		hypothetical protein	23	3	170	84	11.9171	96.5517	3.78824	0.0254291	1	0.387546	1	1	1	1	1
	group_20703		hypothetical protein	23	3	170	84	11.9171	96.5517	3.78824	0.0254291	1	0.387546	1	1	1	1	1
	traG_2		Conjugal transfer protein TraG	23	3	170	84	11.9171	96.5517	3.78824	0.0254291	1	0.387546	1	1	1	1	1
	group_20706		hypothetical protein	23	3	170	84	11.9171	96.5517	3.78824	0.0254291	1	0.387546	1	1	1	1	1
	ephA_2		Epoxide hydrolase A	23	3	170	84	11.9171	96.5517	3.78824	0.0254291	1	0.387546	1	1	1	1	1
	nahD		2-hydroxychromene-2-carboxylate isomerase	23	3	170	84	11.9171	96.5517	3.78824	0.0254291	1	0.387546	1	1	1	1	1
	group_20709		Sulfoquinovose 1-dehydrogenase	23	3	170	84	11.9171	96.5517	3.78824	0.0254291	1	0.387546	1	1	1	1	1
	group_20710		hypothetical protein	23	3	170	84	11.9171	96.5517	3.78824	0.0254291	1	0.387546	1	1	1	1	1
	echA8		putative enoyl-CoA hydratase echA8	23	3	170	84	11.9171	96.5517	3.78824	0.0254291	1	0.387546	1	1	1	1	1
	group_20736	crp_3	cAMP-activated global transcriptional regulator CRP	23	3	170	84	11.9171	96.5517	3.78824	0.0254291	1	0.387546	1	1	1	1	1
	group_20737		hypothetical protein	23	3	170	84	11.9171	96.5517	3.78824	0.0254291	1	0.387546	1	1	1	1	1
	group_20738		hypothetical protein	23	3	170	84	11.9171	96.5517	3.78824	0.0254291	1	0.387546	1	1	1	1	1
	group_20739		hypothetical protein	23	3	170	84	11.9171	96.5517	3.78824	0.0254291	1	0.387546	1	1	1	1	1
	group_20740		hypothetical protein	23	3	170	84	11.9171	96.5517	3.78824	0.0254291	1	0.387546	1	1	1	1	1
	group_20741		hypothetical protein	23	3	170	84	11.9171	96.5517	3.78824	0.0254291	1	0.387546	1	1	1	1	1
	group_20742		hypothetical protein	23	3	170	84	11.9171	96.5517	3.78824	0.0254291	1	0.387546	1	1	1	1	1
	group_20743		hypothetical protein	23	3	170	84	11.9171	96.5517	3.78824	0.0254291	1	0.387546	1	1	1	1	1
	group_20744		hypothetical protein	23	3	170	84	11.9171	96.5517	3.78824	0.0254291	1	0.387546	1	1	1	1	1
	parB_2		putative chromosome-partitioning protein ParB	23	3	170	84	11.9171	96.5517	3.78824	0.0254291	1	0.387546	1	1	1	1	1
	group_5829		hypothetical protein	23	3	170	84	11.9171	96.5517	3.78824	0.0254291	1	0.387546	1	1	1	1	1
	group_7241		hypothetical protein	23	3	170	84	11.9171	96.5517	3.78824	0.0254291	1	0.387546	1	1	1	1	1
	group_7245	gloB_1	hypothetical protein	23	3	170	84	11.9171	96.5517	3.78824	0.0254291	1	0.387546	1	1	1	1	1
	group_8821		hypothetical protein	23	3	170	84	11.9171	96.5517	3.78824	0.0254291	1	0.387546	5	3	3	1	1
	group_12763		hypothetical protein	15	1	178	86	7.77202	98.8506	7.24719	0.0263293	1	0.387546	8	7	1	0.0703125	0.0703125
	group_1500	psiE	hypothetical protein	15	1	178	86	7.77202	98.8506	7.24719	0.0263293	1	0.387546	7	7	1	0.015625	0.125
	group_6708		hypothetical protein	15	1	178	86	7.77202	98.8506	7.24719	0.0263293	1	0.387546	7	7	1	0.015625	0.125
	group_4286		hypothetical protein	90	28	103	59	46.6321	67.8161	1.84119	0.0264205	1	0.387546	39	21	24	0.199591	0.749259
	group_741	hxuA_1	Heme/hemopexin-binding protein	180	73	13	14	93.2642	16.092	2.65543	0.0265434	1	0.387546	14	7	8	0.790527	1
	group_10929		hypothetical protein	188	79	5	8	97.4093	9.1954	3.80759	0.0270083	1	0.387546	4	2	3	0.625	1
	phoA2		Alkaline phosphatase L	188	79	5	8	97.4093	9.1954	3.80759	0.0270083	1	0.387546	3	2	3	0.25	1
	pvdQ		Acyl-homoserine lactone acylase PvdQ	188	79	5	8	97.4093	9.1954	3.80759	0.0270083	1	0.387546	5	3	3	1	1
	group_15356		hypothetical protein	188	79	5	8	97.4093	9.1954	3.80759	0.0270083	1	0.387546	5	3	3	1	1
	group_2464		hypothetical protein	188	79	5	8	97.4093	9.1954	3.80759	0.0270083	1	0.387546	4	3	2	0.625	1
	group_3562		hypothetical protein	188	79	5	8	97.4093	9.1954	3.80759	0.0270083	1	0.387546	5	3	3	1	1
	nemA_2		N-ethylmaleimide reductase	188	79	5	8	97.4093	9.1954	3.80759	0.0270083	1	0.387546	5	3	3	1	1
	malT_1		HTH-type transcriptional regulator MalT	188	79	5	8	97.4093	9.1954	3.80759	0.0270083	1	0.387546	5	3	3	1	1
	group_8252		hypothetical protein	188	79	5	8	97.4093	9.1954	3.80759	0.0270083	1	0.387546	5	3	3	1	1
	group_11370		hypothetical protein	5	8	188	79	2.59067	90.8046	0.262633	0.0270083	1	0.387546	3	2	3	0.25	1
	group_15673	queC_1	7-cyano-7-deazaguanine synthase	5	8	188	79	2.59067	90.8046	0.262633	0.0270083	1	0.387546	3	2	3	0.25	1
	group_2328	cheA_4	Chemotaxis protein CheA	5	8	188	79	2.59067	90.8046	0.262633	0.0270083	1	0.387546	5	3	3	1	1
	group_3431	glpT_1	Glycerol-3-phosphate transporter	5	8	188	79	2.59067	90.8046	0.262633	0.0270083	1	0.387546	4	3	3	0.625	0.625
	group_5156	fabG_13	3-oxoacyl-[acyl-carrier-protein] reductase FabG	5	8	188	79	2.59067	90.8046	0.262633	0.0270083	1	0.387546	4	3	3	0.625	0.625
	fimD_1		Outer membrane usher protein FimD	5	8	188	79	2.59067	90.8046	0.262633	0.0270083	1	0.387546	9	3	6	0.507812	0.507812
	group_12062		hypothetical protein	16	1	177	86	8.29016	98.8506	7.77401	0.0270216	1	0.387546	11	10	1	0.0117188	0.0117188
	group_12525	intS_1	Prophage integrase IntS	16	1	177	86	8.29016	98.8506	7.77401	0.0270216	1	0.387546	12	12	1	0.000488281	0.00634766
	group_33151		hypothetical protein	16	1	177	86	8.29016	98.8506	7.77401	0.0270216	1	0.387546	12	11	1	0.00634766	0.00634766
	group_1049		hypothetical protein	115	39	78	48	59.5855	55.1724	1.8146	0.0271902	1	0.387546	39	21	29	0.00337785	0.749259
	hxuA_2		Heme/hemopexin-binding protein	97	31	96	56	50.2591	64.3678	1.82527	0.0275124	1	0.387546	19	11	13	0.167068	0.647606
	lutA		Lactate utilization protein A	190	81	3	6	98.4456	6.89655	4.69136	0.0279581	1	0.387546	1	1	1	1	1
	group_10026		hypothetical protein	190	81	3	6	98.4456	6.89655	4.69136	0.0279581	1	0.387546	1	1	1	1	1
	group_10119		hypothetical protein	190	81	3	6	98.4456	6.89655	4.69136	0.0279581	1	0.387546	1	1	1	1	1
	group_10120		hypothetical protein	190	81	3	6	98.4456	6.89655	4.69136	0.0279581	1	0.387546	1	1	1	1	1
	gcvH_1		Glycine cleavage system H protein	190	81	3	6	98.4456	6.89655	4.69136	0.0279581	1	0.387546	1	1	1	1	1
	nat		Arylamine N-acetyltransferase	190	81	3	6	98.4456	6.89655	4.69136	0.0279581	1	0.387546	1	1	1	1	1
	lpd3		Dihydrolipoyl dehydrogenase 3	190	81	3	6	98.4456	6.89655	4.69136	0.0279581	1	0.387546	1	1	1	1	1
	isfD_1		Sulfoacetaldehyde reductase	190	81	3	6	98.4456	6.89655	4.69136	0.0279581	1	0.387546	1	1	1	1	1
	group_10133		hypothetical protein	190	81	3	6	98.4456	6.89655	4.69136	0.0279581	1	0.387546	1	1	1	1	1
	group_10143		hypothetical protein	190	81	3	6	98.4456	6.89655	4.69136	0.0279581	1	0.387546	1	1	1	1	1
	group_10157		Thermolabile hemolysin	190	81	3	6	98.4456	6.89655	4.69136	0.0279581	1	0.387546	1	1	1	1	1
	nnr		Bifunctional NAD(P)H-hydrate repair enzyme Nnr	190	81	3	6	98.4456	6.89655	4.69136	0.0279581	1	0.387546	1	1	1	1	1
	group_10167		hypothetical protein	190	81	3	6	98.4456	6.89655	4.69136	0.0279581	1	0.387546	1	1	1	1	1
	group_10170		hypothetical protein	190	81	3	6	98.4456	6.89655	4.69136	0.0279581	1	0.387546	1	1	1	1	1
	kefF_1		Glutathione-regulated potassium-efflux system ancillary protein KefF	190	81	3	6	98.4456	6.89655	4.69136	0.0279581	1	0.387546	1	1	1	1	1
	dsbB_1		Disulfide bond formation protein B	190	81	3	6	98.4456	6.89655	4.69136	0.0279581	1	0.387546	1	1	1	1	1
	bluR_2		HTH-type transcriptional repressor BluR	190	81	3	6	98.4456	6.89655	4.69136	0.0279581	1	0.387546	1	1	1	1	1
	murI		Glutamate racemase	190	81	3	6	98.4456	6.89655	4.69136	0.0279581	1	0.387546	1	1	1	1	1
	rhlG		Rhamnolipids biosynthesis 3-oxoacyl-[acyl-carrier-protein] reductase	190	81	3	6	98.4456	6.89655	4.69136	0.0279581	1	0.387546	1	1	1	1	1
	group_10356		hypothetical protein	190	81	3	6	98.4456	6.89655	4.69136	0.0279581	1	0.387546	1	1	1	1	1
	qorA_2		Quinone oxidoreductase 1	190	81	3	6	98.4456	6.89655	4.69136	0.0279581	1	0.387546	1	1	1	1	1
	gcvA_6		Glycine cleavage system transcriptional activator	190	81	3	6	98.4456	6.89655	4.69136	0.0279581	1	0.387546	1	1	1	1	1
	group_10363		hypothetical protein	190	81	3	6	98.4456	6.89655	4.69136	0.0279581	1	0.387546	1	1	1	1	1
	trpI_1		HTH-type transcriptional regulator TrpI	190	81	3	6	98.4456	6.89655	4.69136	0.0279581	1	0.387546	1	1	1	1	1
	group_10396		hypothetical protein	190	81	3	6	98.4456	6.89655	4.69136	0.0279581	1	0.387546	1	1	1	1	1
	group_10401		hypothetical protein	190	81	3	6	98.4456	6.89655	4.69136	0.0279581	1	0.387546	1	1	1	1	1
	atoS_1		Signal transduction histidine-protein kinase AtoS	190	81	3	6	98.4456	6.89655	4.69136	0.0279581	1	0.387546	1	1	1	1	1
	dosC_1		Diguanylate cyclase DosC	190	81	3	6	98.4456	6.89655	4.69136	0.0279581	1	0.387546	1	1	1	1	1
	group_10415	nimR_3	HTH-type transcriptional regulator NimR	190	81	3	6	98.4456	6.89655	4.69136	0.0279581	1	0.387546	1	1	1	1	1
	ltaS		Lipoteichoic acid synthase	190	81	3	6	98.4456	6.89655	4.69136	0.0279581	1	0.387546	1	1	1	1	1
	dgt_1		Deoxyguanosinetriphosphate triphosphohydrolase	190	81	3	6	98.4456	6.89655	4.69136	0.0279581	1	0.387546	1	1	1	1	1
	group_10423	dmlR_3	HTH-type transcriptional regulator DmlR	190	81	3	6	98.4456	6.89655	4.69136	0.0279581	1	0.387546	1	1	1	1	1
	coaX		Type III pantothenate kinase	190	81	3	6	98.4456	6.89655	4.69136	0.0279581	1	0.387546	1	1	1	1	1
	rhtB_2		Homoserine/homoserine lactone efflux protein	190	81	3	6	98.4456	6.89655	4.69136	0.0279581	1	0.387546	1	1	1	1	1
	pldh-t		Pyridoxal 4-dehydrogenase	190	81	3	6	98.4456	6.89655	4.69136	0.0279581	1	0.387546	1	1	1	1	1
	trpF		N-(5'-phosphoribosyl)anthranilate isomerase	190	81	3	6	98.4456	6.89655	4.69136	0.0279581	1	0.387546	1	1	1	1	1
	group_10621	yabJ_5	2-iminobutanoate/2-iminopropanoate deaminase	190	81	3	6	98.4456	6.89655	4.69136	0.0279581	1	0.387546	1	1	1	1	1
	group_10641		Nitronate monooxygenase	190	81	3	6	98.4456	6.89655	4.69136	0.0279581	1	0.387546	1	1	1	1	1
	group_10647		hypothetical protein	190	81	3	6	98.4456	6.89655	4.69136	0.0279581	1	0.387546	1	1	1	1	1
	murU		N-acetylmuramate alpha-1-phosphate uridylyltransferase	190	81	3	6	98.4456	6.89655	4.69136	0.0279581	1	0.387546	1	1	1	1	1
	sulD		Bifunctional folate synthesis protein	190	81	3	6	98.4456	6.89655	4.69136	0.0279581	1	0.387546	1	1	1	1	1
	yqjC		Protein YqjC	190	81	3	6	98.4456	6.89655	4.69136	0.0279581	1	0.387546	1	1	1	1	1
	guaA_4		GMP synthase [glutamine-hydrolyzing]	190	81	3	6	98.4456	6.89655	4.69136	0.0279581	1	0.387546	1	1	1	1	1
	argD		Acetylornithine aminotransferase	190	81	3	6	98.4456	6.89655	4.69136	0.0279581	1	0.387546	1	1	1	1	1
	tktA		Transketolase 1	190	81	3	6	98.4456	6.89655	4.69136	0.0279581	1	0.387546	1	1	1	1	1
	vgb_2		Virginiamycin B lyase	190	81	3	6	98.4456	6.89655	4.69136	0.0279581	1	0.387546	1	1	1	1	1
	group_10726		hypothetical protein	190	81	3	6	98.4456	6.89655	4.69136	0.0279581	1	0.387546	1	1	1	1	1
	potF_2		Putrescine-binding periplasmic protein	190	81	3	6	98.4456	6.89655	4.69136	0.0279581	1	0.387546	1	1	1	1	1
	group_10737		hypothetical protein	190	81	3	6	98.4456	6.89655	4.69136	0.0279581	1	0.387546	1	1	1	1	1
	tauR		HTH-type transcriptional regulator TauR	190	81	3	6	98.4456	6.89655	4.69136	0.0279581	1	0.387546	1	1	1	1	1
	cheY_4		Chemotaxis protein CheY	190	81	3	6	98.4456	6.89655	4.69136	0.0279581	1	0.387546	1	1	1	1	1
	alc		allantoicase	190	81	3	6	98.4456	6.89655	4.69136	0.0279581	1	0.387546	1	1	1	1	1
	group_10751		Baeyer-Villiger monooxygenase	190	81	3	6	98.4456	6.89655	4.69136	0.0279581	1	0.387546	1	1	1	1	1
	group_11095		hypothetical protein	190	81	3	6	98.4456	6.89655	4.69136	0.0279581	1	0.387546	1	1	1	1	1
	phrB		Deoxyribodipyrimidine photo-lyase	190	81	3	6	98.4456	6.89655	4.69136	0.0279581	1	0.387546	1	1	1	1	1
	group_11110	fecR_1	Protein FecR	190	81	3	6	98.4456	6.89655	4.69136	0.0279581	1	0.387546	1	1	1	1	1
	group_11121		hypothetical protein	190	81	3	6	98.4456	6.89655	4.69136	0.0279581	1	0.387546	1	1	1	1	1
	group_12152		hypothetical protein	190	81	3	6	98.4456	6.89655	4.69136	0.0279581	1	0.387546	1	1	1	1	1
	group_13633		hypothetical protein	190	81	3	6	98.4456	6.89655	4.69136	0.0279581	1	0.387546	1	1	1	1	1
	group_13881		hypothetical protein	190	81	3	6	98.4456	6.89655	4.69136	0.0279581	1	0.387546	1	1	1	1	1
	rsxB		Electron transport complex subunit RsxB	190	81	3	6	98.4456	6.89655	4.69136	0.0279581	1	0.387546	1	1	1	1	1
	group_14033		hypothetical protein	190	81	3	6	98.4456	6.89655	4.69136	0.0279581	1	0.387546	1	1	1	1	1
	group_14034		hypothetical protein	190	81	3	6	98.4456	6.89655	4.69136	0.0279581	1	0.387546	1	1	1	1	1
	wbgU		UDP-N-acetylglucosamine 4-epimerase	190	81	3	6	98.4456	6.89655	4.69136	0.0279581	1	0.387546	1	1	1	1	1
	styD		Phenylacetaldehyde dehydrogenase	190	81	3	6	98.4456	6.89655	4.69136	0.0279581	1	0.387546	1	1	1	1	1
	nphR		Transcriptional activator NphR	190	81	3	6	98.4456	6.89655	4.69136	0.0279581	1	0.387546	1	1	1	1	1
	gutB		Sorbitol dehydrogenase	190	81	3	6	98.4456	6.89655	4.69136	0.0279581	1	0.387546	1	1	1	1	1
	oprB_1		Porin B	190	81	3	6	98.4456	6.89655	4.69136	0.0279581	1	0.387546	1	1	1	1	1
	group_14045		hypothetical protein	190	81	3	6	98.4456	6.89655	4.69136	0.0279581	1	0.387546	1	1	1	1	1
	phzM		Phenazine-1-carboxylate N-methyltransferase	190	81	3	6	98.4456	6.89655	4.69136	0.0279581	1	0.387546	1	1	1	1	1
	ycgR_1		Flagellar brake protein YcgR	190	81	3	6	98.4456	6.89655	4.69136	0.0279581	1	0.387546	1	1	1	1	1
	group_14154	cph2_2	Phytochrome-like protein cph2	190	81	3	6	98.4456	6.89655	4.69136	0.0279581	1	0.387546	1	1	1	1	1
	fabH		3-oxoacyl-[acyl-carrier-protein] synthase 3	190	81	3	6	98.4456	6.89655	4.69136	0.0279581	1	0.387546	1	1	1	1	1
	group_14156		Cytochrome P450 107B1	190	81	3	6	98.4456	6.89655	4.69136	0.0279581	1	0.387546	1	1	1	1	1
	auaG		Aurachin C monooxygenase/isomerase	190	81	3	6	98.4456	6.89655	4.69136	0.0279581	1	0.387546	1	1	1	1	1
	clpP_1		ATP-dependent Clp protease proteolytic subunit	190	81	3	6	98.4456	6.89655	4.69136	0.0279581	1	0.387546	1	1	1	1	1
	group_14159		Monoacylglycerol lipase	190	81	3	6	98.4456	6.89655	4.69136	0.0279581	1	0.387546	1	1	1	1	1
	group_14160		hypothetical protein	190	81	3	6	98.4456	6.89655	4.69136	0.0279581	1	0.387546	1	1	1	1	1
	group_14162		hypothetical protein	190	81	3	6	98.4456	6.89655	4.69136	0.0279581	1	0.387546	1	1	1	1	1
	polC_1		DNA polymerase III PolC-type	190	81	3	6	98.4456	6.89655	4.69136	0.0279581	1	0.387546	1	1	1	1	1
	exsA_1		Exoenzyme S synthesis regulatory protein ExsA	190	81	3	6	98.4456	6.89655	4.69136	0.0279581	1	0.387546	1	1	1	1	1
	group_14165		hypothetical protein	190	81	3	6	98.4456	6.89655	4.69136	0.0279581	1	0.387546	1	1	1	1	1
	thrB		Homoserine kinase	190	81	3	6	98.4456	6.89655	4.69136	0.0279581	1	0.387546	1	1	1	1	1
	amiD_1		N-acetylmuramoyl-L-alanine amidase AmiD	190	81	3	6	98.4456	6.89655	4.69136	0.0279581	1	0.387546	1	1	1	1	1
	group_14170		putative S-adenosylmethionine-dependent methyltransferase/MSMEI_2290	190	81	3	6	98.4456	6.89655	4.69136	0.0279581	1	0.387546	1	1	1	1	1
	group_14172	algA_1	Alginate biosynthesis protein AlgA	190	81	3	6	98.4456	6.89655	4.69136	0.0279581	1	0.387546	1	1	1	1	1
	group_14173		hypothetical protein	190	81	3	6	98.4456	6.89655	4.69136	0.0279581	1	0.387546	1	1	1	1	1
	pobA		p-hydroxybenzoate hydroxylase	190	81	3	6	98.4456	6.89655	4.69136	0.0279581	1	0.387546	1	1	1	1	1
	bmr3		Multidrug resistance protein 3	190	81	3	6	98.4456	6.89655	4.69136	0.0279581	1	0.387546	1	1	1	1	1
	nicS_1		HTH-type transcriptional repressor NicS	190	81	3	6	98.4456	6.89655	4.69136	0.0279581	1	0.387546	1	1	1	1	1
	iclR		Transcriptional repressor IclR	190	81	3	6	98.4456	6.89655	4.69136	0.0279581	1	0.387546	1	1	1	1	1
	group_14180	cynR_3	HTH-type transcriptional regulator CynR	190	81	3	6	98.4456	6.89655	4.69136	0.0279581	1	0.387546	1	1	1	1	1
	group_14239		hypothetical protein	190	81	3	6	98.4456	6.89655	4.69136	0.0279581	1	0.387546	1	1	1	1	1
	ybgC_1		Acyl-CoA thioester hydrolase YbgC	190	81	3	6	98.4456	6.89655	4.69136	0.0279581	1	0.387546	1	1	1	1	1
	group_14241		Cytochrome c-555	190	81	3	6	98.4456	6.89655	4.69136	0.0279581	1	0.387546	1	1	1	1	1
	group_14242		L-gulono-1,4-lactone dehydrogenase	190	81	3	6	98.4456	6.89655	4.69136	0.0279581	1	0.387546	1	1	1	1	1
	group_14244		putative signaling protein	190	81	3	6	98.4456	6.89655	4.69136	0.0279581	1	0.387546	1	1	1	1	1
	cyaY		Iron-sulfur cluster assembly protein CyaY	190	81	3	6	98.4456	6.89655	4.69136	0.0279581	1	0.387546	1	1	1	1	1
	group_14269		hypothetical protein	190	81	3	6	98.4456	6.89655	4.69136	0.0279581	1	0.387546	1	1	1	1	1
	rnfH		Protein RnfH	190	81	3	6	98.4456	6.89655	4.69136	0.0279581	1	0.387546	1	1	1	1	1
	qseC_1		Sensor protein QseC	190	81	3	6	98.4456	6.89655	4.69136	0.0279581	1	0.387546	1	1	1	1	1
	eamA_1		putative amino-acid metabolite efflux pump	190	81	3	6	98.4456	6.89655	4.69136	0.0279581	1	0.387546	1	1	1	1	1
	group_14394		Cyclic di-GMP phosphodiesterase	190	81	3	6	98.4456	6.89655	4.69136	0.0279581	1	0.387546	1	1	1	1	1
	group_14395		putative protein	190	81	3	6	98.4456	6.89655	4.69136	0.0279581	1	0.387546	1	1	1	1	1
	group_14396		hypothetical protein	190	81	3	6	98.4456	6.89655	4.69136	0.0279581	1	0.387546	1	1	1	1	1
	eryG		Erythromycin 3''-O-methyltransferase	190	81	3	6	98.4456	6.89655	4.69136	0.0279581	1	0.387546	1	1	1	1	1
	yfcD		putative Nudix hydrolase YfcD	190	81	3	6	98.4456	6.89655	4.69136	0.0279581	1	0.387546	1	1	1	1	1
	bmrR		Multidrug-efflux transporter 1 regulator	190	81	3	6	98.4456	6.89655	4.69136	0.0279581	1	0.387546	1	1	1	1	1
	gntR_1		putative D-xylose utilization operon transcriptional repressor	190	81	3	6	98.4456	6.89655	4.69136	0.0279581	1	0.387546	1	1	1	1	1
	group_14402		putative protein	190	81	3	6	98.4456	6.89655	4.69136	0.0279581	1	0.387546	1	1	1	1	1
	group_14406		Multidrug transporter	190	81	3	6	98.4456	6.89655	4.69136	0.0279581	1	0.387546	1	1	1	1	1
	yhdN_1		Aldo-keto reductase YhdN	190	81	3	6	98.4456	6.89655	4.69136	0.0279581	1	0.387546	1	1	1	1	1
	group_14466		hypothetical protein	190	81	3	6	98.4456	6.89655	4.69136	0.0279581	1	0.387546	1	1	1	1	1
	group_14467		Epimerase family protein	190	81	3	6	98.4456	6.89655	4.69136	0.0279581	1	0.387546	1	1	1	1	1
	group_14471		hypothetical protein	190	81	3	6	98.4456	6.89655	4.69136	0.0279581	1	0.387546	1	1	1	1	1
	group_14474		hypothetical protein	190	81	3	6	98.4456	6.89655	4.69136	0.0279581	1	0.387546	1	1	1	1	1
	group_14475	puuB_1	Gamma-glutamylputrescine oxidoreductase	190	81	3	6	98.4456	6.89655	4.69136	0.0279581	1	0.387546	1	1	1	1	1
	czcO		putative oxidoreductase CzcO	190	81	3	6	98.4456	6.89655	4.69136	0.0279581	1	0.387546	1	1	1	1	1
	rsmB		Ribosomal RNA small subunit methyltransferase B	190	81	3	6	98.4456	6.89655	4.69136	0.0279581	1	0.387546	1	1	1	1	1
	fmt		Methionyl-tRNA formyltransferase	190	81	3	6	98.4456	6.89655	4.69136	0.0279581	1	0.387546	1	1	1	1	1
	aroE_2		Shikimate dehydrogenase (NADP(+))	190	81	3	6	98.4456	6.89655	4.69136	0.0279581	1	0.387546	1	1	1	1	1
	opuAC		Glycine betaine-binding protein OpuAC	190	81	3	6	98.4456	6.89655	4.69136	0.0279581	1	0.387546	1	1	1	1	1
	trpA		Tryptophan synthase alpha chain	190	81	3	6	98.4456	6.89655	4.69136	0.0279581	1	0.387546	1	1	1	1	1
	bcp		Peroxiredoxin Bcp	190	81	3	6	98.4456	6.89655	4.69136	0.0279581	1	0.387546	1	1	1	1	1
	smc_1		Chromosome partition protein Smc	190	81	3	6	98.4456	6.89655	4.69136	0.0279581	1	0.387546	1	1	1	1	1
	yfcG_1		Disulfide-bond oxidoreductase YfcG	190	81	3	6	98.4456	6.89655	4.69136	0.0279581	1	0.387546	1	1	1	1	1
	group_14515		hypothetical protein	190	81	3	6	98.4456	6.89655	4.69136	0.0279581	1	0.387546	1	1	1	1	1
	cdaR		Carbohydrate diacid regulator	190	81	3	6	98.4456	6.89655	4.69136	0.0279581	1	0.387546	1	1	1	1	1
	group_14518	dmlR_2	HTH-type transcriptional regulator DmlR	190	81	3	6	98.4456	6.89655	4.69136	0.0279581	1	0.387546	1	1	1	1	1
	group_14523	oprF_2	Outer membrane porin F	190	81	3	6	98.4456	6.89655	4.69136	0.0279581	1	0.387546	1	1	1	1	1
	yhdN_2		Aldo-keto reductase YhdN	190	81	3	6	98.4456	6.89655	4.69136	0.0279581	1	0.387546	1	1	1	1	1
	group_14526	hchA	Protein/nucleic acid deglycase HchA	190	81	3	6	98.4456	6.89655	4.69136	0.0279581	1	0.387546	1	1	1	1	1
	mntP		putative manganese efflux pump MntP	190	81	3	6	98.4456	6.89655	4.69136	0.0279581	1	0.387546	1	1	1	1	1
	group_14676		hypothetical protein	190	81	3	6	98.4456	6.89655	4.69136	0.0279581	1	0.387546	1	1	1	1	1
	yfkJ		Low molecular weight protein-tyrosine-phosphatase YfkJ	190	81	3	6	98.4456	6.89655	4.69136	0.0279581	1	0.387546	1	1	1	1	1
	group_14680		hypothetical protein	190	81	3	6	98.4456	6.89655	4.69136	0.0279581	1	0.387546	1	1	1	1	1
	usg		USG-1 protein	190	81	3	6	98.4456	6.89655	4.69136	0.0279581	1	0.387546	1	1	1	1	1
	group_14714		hypothetical protein	190	81	3	6	98.4456	6.89655	4.69136	0.0279581	1	0.387546	1	1	1	1	1
	ephD_2		putative oxidoreductase EphD	190	81	3	6	98.4456	6.89655	4.69136	0.0279581	1	0.387546	1	1	1	1	1
	ftsH_2		ATP-dependent zinc metalloprotease FtsH	190	81	3	6	98.4456	6.89655	4.69136	0.0279581	1	0.387546	1	1	1	1	1
	potD_4		Spermidine/putrescine-binding periplasmic protein	190	81	3	6	98.4456	6.89655	4.69136	0.0279581	1	0.387546	1	1	1	1	1
	pdxA		4-hydroxythreonine-4-phosphate dehydrogenase	190	81	3	6	98.4456	6.89655	4.69136	0.0279581	1	0.387546	1	1	1	1	1
	apaH		Bis(5'-nucleosyl)-tetraphosphatase, symmetrical	190	81	3	6	98.4456	6.89655	4.69136	0.0279581	1	0.387546	1	1	1	1	1
	rclR_2		RCS-specific HTH-type transcriptional activator RclR	190	81	3	6	98.4456	6.89655	4.69136	0.0279581	1	0.387546	1	1	1	1	1
	puuR_3		HTH-type transcriptional regulator PuuR	190	81	3	6	98.4456	6.89655	4.69136	0.0279581	1	0.387546	1	1	1	1	1
	yiiM_2		Protein YiiM	190	81	3	6	98.4456	6.89655	4.69136	0.0279581	1	0.387546	1	1	1	1	1
	nirS_2		Nitrite reductase	190	81	3	6	98.4456	6.89655	4.69136	0.0279581	1	0.387546	1	1	1	1	1
	creC		Sensor protein CreC	190	81	3	6	98.4456	6.89655	4.69136	0.0279581	1	0.387546	1	1	1	1	1
	group_14748	spuE_3	Spermidine-binding periplasmic protein SpuE	190	81	3	6	98.4456	6.89655	4.69136	0.0279581	1	0.387546	1	1	1	1	1
	group_14749		hypothetical protein	190	81	3	6	98.4456	6.89655	4.69136	0.0279581	1	0.387546	1	1	1	1	1
	group_14750		hypothetical protein	190	81	3	6	98.4456	6.89655	4.69136	0.0279581	1	0.387546	1	1	1	1	1
	mdtI		Spermidine export protein MdtI	190	81	3	6	98.4456	6.89655	4.69136	0.0279581	1	0.387546	1	1	1	1	1
	group_14752		hypothetical protein	190	81	3	6	98.4456	6.89655	4.69136	0.0279581	1	0.387546	1	1	1	1	1
	cyaA		Adenylate cyclase	190	81	3	6	98.4456	6.89655	4.69136	0.0279581	1	0.387546	1	1	1	1	1
	cysG_2		Siroheme synthase	190	81	3	6	98.4456	6.89655	4.69136	0.0279581	1	0.387546	1	1	1	1	1
	group_21330		hypothetical protein	190	81	3	6	98.4456	6.89655	4.69136	0.0279581	1	0.387546	1	1	1	1	1
	aroK_1		Shikimate kinase	190	81	3	6	98.4456	6.89655	4.69136	0.0279581	1	0.387546	1	1	1	1	1
	cheA_4		Chemotaxis protein CheA	190	81	3	6	98.4456	6.89655	4.69136	0.0279581	1	0.387546	1	1	1	1	1
	group_2470		hypothetical protein	190	81	3	6	98.4456	6.89655	4.69136	0.0279581	1	0.387546	1	1	1	1	1
	ftsN_2		Cell division protein FtsN	190	81	3	6	98.4456	6.89655	4.69136	0.0279581	1	0.387546	1	1	1	1	1
	murB		UDP-N-acetylenolpyruvoylglucosamine reductase	190	81	3	6	98.4456	6.89655	4.69136	0.0279581	1	0.387546	1	1	1	1	1
	betC		Choline-sulfatase	190	81	3	6	98.4456	6.89655	4.69136	0.0279581	1	0.387546	1	1	1	1	1
	group_30345		hypothetical protein	190	81	3	6	98.4456	6.89655	4.69136	0.0279581	1	0.387546	1	1	1	1	1
	mepM_3		Murein DD-endopeptidase MepM	190	81	3	6	98.4456	6.89655	4.69136	0.0279581	1	0.387546	1	1	1	1	1
	dhbF		Dimodular nonribosomal peptide synthase	190	81	3	6	98.4456	6.89655	4.69136	0.0279581	1	0.387546	1	1	1	1	1
	group_32407		hypothetical protein	190	81	3	6	98.4456	6.89655	4.69136	0.0279581	1	0.387546	1	1	1	1	1
	group_3244		putative signaling protein	190	81	3	6	98.4456	6.89655	4.69136	0.0279581	1	0.387546	1	1	1	1	1
	esiB_2		Secretory immunoglobulin A-binding protein EsiB	190	81	3	6	98.4456	6.89655	4.69136	0.0279581	1	0.387546	1	1	1	1	1
	apt		Adenine phosphoribosyltransferase	190	81	3	6	98.4456	6.89655	4.69136	0.0279581	1	0.387546	1	1	1	1	1
	group_3331		hypothetical protein	190	81	3	6	98.4456	6.89655	4.69136	0.0279581	1	0.387546	1	1	1	1	1
	group_3607		hypothetical protein	190	81	3	6	98.4456	6.89655	4.69136	0.0279581	1	0.387546	1	1	1	1	1
	hudA		UbiD-like decarboxylase	190	81	3	6	98.4456	6.89655	4.69136	0.0279581	1	0.387546	1	1	1	1	1
	group_3681		hypothetical protein	190	81	3	6	98.4456	6.89655	4.69136	0.0279581	1	0.387546	1	1	1	1	1
	group_3775		hypothetical protein	190	81	3	6	98.4456	6.89655	4.69136	0.0279581	1	0.387546	1	1	1	1	1
	group_3776		hypothetical protein	190	81	3	6	98.4456	6.89655	4.69136	0.0279581	1	0.387546	1	1	1	1	1
	yycB_2		putative transporter YycB	190	81	3	6	98.4456	6.89655	4.69136	0.0279581	1	0.387546	1	1	1	1	1
	group_3784		hypothetical protein	190	81	3	6	98.4456	6.89655	4.69136	0.0279581	1	0.387546	1	1	1	1	1
	group_3798		hypothetical protein	190	81	3	6	98.4456	6.89655	4.69136	0.0279581	1	0.387546	4	2	3	0.625	1
	group_3873		hypothetical protein	190	81	3	6	98.4456	6.89655	4.69136	0.0279581	1	0.387546	1	1	1	1	1
	group_3877		hypothetical protein	190	81	3	6	98.4456	6.89655	4.69136	0.0279581	1	0.387546	1	1	1	1	1
	group_4238		hypothetical protein	190	81	3	6	98.4456	6.89655	4.69136	0.0279581	1	0.387546	1	1	1	1	1
	marR_2		Multiple antibiotic resistance protein MarR	190	81	3	6	98.4456	6.89655	4.69136	0.0279581	1	0.387546	1	1	1	1	1
	ubiC		Chorismate pyruvate-lyase	190	81	3	6	98.4456	6.89655	4.69136	0.0279581	1	0.387546	1	1	1	1	1
	group_4306		hypothetical protein	190	81	3	6	98.4456	6.89655	4.69136	0.0279581	1	0.387546	1	1	1	1	1
	group_4337		hypothetical protein	190	81	3	6	98.4456	6.89655	4.69136	0.0279581	1	0.387546	1	1	1	1	1
	group_4342		hypothetical protein	190	81	3	6	98.4456	6.89655	4.69136	0.0279581	1	0.387546	1	1	1	1	1
	group_4356		hypothetical protein	190	81	3	6	98.4456	6.89655	4.69136	0.0279581	1	0.387546	1	1	1	1	1
	group_4357		hypothetical protein	190	81	3	6	98.4456	6.89655	4.69136	0.0279581	1	0.387546	1	1	1	1	1
	ydhC		Inner membrane transport protein YdhC	190	81	3	6	98.4456	6.89655	4.69136	0.0279581	1	0.387546	1	1	1	1	1
	rpaR		HTH-type quorum sensing-dependent transcriptional regulator RpaR	190	81	3	6	98.4456	6.89655	4.69136	0.0279581	1	0.387546	1	1	1	1	1
	group_4450		hypothetical protein	190	81	3	6	98.4456	6.89655	4.69136	0.0279581	1	0.387546	1	1	1	1	1
	group_4451		hypothetical protein	190	81	3	6	98.4456	6.89655	4.69136	0.0279581	1	0.387546	1	1	1	1	1
	group_4644		hypothetical protein	190	81	3	6	98.4456	6.89655	4.69136	0.0279581	1	0.387546	1	1	1	1	1
	group_5038		hypothetical protein	190	81	3	6	98.4456	6.89655	4.69136	0.0279581	1	0.387546	1	1	1	1	1
	group_5040		hypothetical protein	190	81	3	6	98.4456	6.89655	4.69136	0.0279581	1	0.387546	1	1	1	1	1
	yijE_1		putative cystine transporter YijE	190	81	3	6	98.4456	6.89655	4.69136	0.0279581	1	0.387546	1	1	1	1	1
	group_5088	pleD_2	Response regulator PleD	190	81	3	6	98.4456	6.89655	4.69136	0.0279581	1	0.387546	1	1	1	1	1
	mgtB		Magnesium-transporting ATPase, P-type 1	190	81	3	6	98.4456	6.89655	4.69136	0.0279581	1	0.387546	1	1	1	1	1
	pobB		Phenoxybenzoate dioxygenase subunit beta	190	81	3	6	98.4456	6.89655	4.69136	0.0279581	1	0.387546	1	1	1	1	1
	hprA		Glycerate dehydrogenase	190	81	3	6	98.4456	6.89655	4.69136	0.0279581	1	0.387546	1	1	1	1	1
	pikAV		Thioesterase PikA5	190	81	3	6	98.4456	6.89655	4.69136	0.0279581	1	0.387546	1	1	1	1	1
	group_5216		hypothetical protein	190	81	3	6	98.4456	6.89655	4.69136	0.0279581	1	0.387546	1	1	1	1	1
	fliH		Flagellar assembly protein FliH	190	81	3	6	98.4456	6.89655	4.69136	0.0279581	1	0.387546	1	1	1	1	1
	group_5230		hypothetical protein	190	81	3	6	98.4456	6.89655	4.69136	0.0279581	1	0.387546	1	1	1	1	1
	group_5231		hypothetical protein	190	81	3	6	98.4456	6.89655	4.69136	0.0279581	1	0.387546	1	1	1	1	1
	rhtC_1		Threonine efflux protein	190	81	3	6	98.4456	6.89655	4.69136	0.0279581	1	0.387546	1	1	1	1	1
	group_5277	hemN_1	hypothetical protein	190	81	3	6	98.4456	6.89655	4.69136	0.0279581	1	0.387546	1	1	1	1	1
	yceF		Maf-like protein YceF	190	81	3	6	98.4456	6.89655	4.69136	0.0279581	1	0.387546	1	1	1	1	1
	group_5289		hypothetical protein	190	81	3	6	98.4456	6.89655	4.69136	0.0279581	1	0.387546	1	1	1	1	1
	yibF_2		putative GST-like protein YibF	190	81	3	6	98.4456	6.89655	4.69136	0.0279581	1	0.387546	1	1	1	1	1
	group_5312		hypothetical protein	190	81	3	6	98.4456	6.89655	4.69136	0.0279581	1	0.387546	1	1	1	1	1
	group_5314		hypothetical protein	190	81	3	6	98.4456	6.89655	4.69136	0.0279581	1	0.387546	1	1	1	1	1
	group_5316		hypothetical protein	190	81	3	6	98.4456	6.89655	4.69136	0.0279581	1	0.387546	1	1	1	1	1
	group_5481		hypothetical protein	190	81	3	6	98.4456	6.89655	4.69136	0.0279581	1	0.387546	1	1	1	1	1
	group_5484		hypothetical protein	190	81	3	6	98.4456	6.89655	4.69136	0.0279581	1	0.387546	1	1	1	1	1
	group_5509		hypothetical protein	190	81	3	6	98.4456	6.89655	4.69136	0.0279581	1	0.387546	1	1	1	1	1
	yhaI_1		Inner membrane protein YhaI	190	81	3	6	98.4456	6.89655	4.69136	0.0279581	1	0.387546	1	1	1	1	1
	cobK		Precorrin-6A reductase	190	81	3	6	98.4456	6.89655	4.69136	0.0279581	1	0.387546	1	1	1	1	1
	group_6037		hypothetical protein	190	81	3	6	98.4456	6.89655	4.69136	0.0279581	1	0.387546	1	1	1	1	1
	ramB		hypothetical protein	190	81	3	6	98.4456	6.89655	4.69136	0.0279581	1	0.387546	1	1	1	1	1
	budC_1		Diacetyl reductase [(S)-acetoin forming]	190	81	3	6	98.4456	6.89655	4.69136	0.0279581	1	0.387546	1	1	1	1	1
	group_6079		hypothetical protein	190	81	3	6	98.4456	6.89655	4.69136	0.0279581	1	0.387546	1	1	1	1	1
	group_6080	catD_2	hypothetical protein	190	81	3	6	98.4456	6.89655	4.69136	0.0279581	1	0.387546	1	1	1	1	1
	group_6081		hypothetical protein	190	81	3	6	98.4456	6.89655	4.69136	0.0279581	1	0.387546	1	1	1	1	1
	mgtA_1		GDP-mannose-dependent alpha-mannosyltransferase	190	81	3	6	98.4456	6.89655	4.69136	0.0279581	1	0.387546	1	1	1	1	1
	group_6097		hypothetical protein	190	81	3	6	98.4456	6.89655	4.69136	0.0279581	1	0.387546	1	1	1	1	1
	prfB_2		Peptide chain release factor RF2	190	81	3	6	98.4456	6.89655	4.69136	0.0279581	1	0.387546	1	1	1	1	1
	aroE_1		Quinate/shikimate dehydrogenase (NAD(+))	190	81	3	6	98.4456	6.89655	4.69136	0.0279581	1	0.387546	1	1	1	1	1
	iolG		Myo-inositol 2-dehydrogenase	190	81	3	6	98.4456	6.89655	4.69136	0.0279581	1	0.387546	1	1	1	1	1
	rsmC		Ribosomal RNA small subunit methyltransferase C	190	81	3	6	98.4456	6.89655	4.69136	0.0279581	1	0.387546	1	1	1	1	1
	pknK_2		Serine/threonine-protein kinase PknK	190	81	3	6	98.4456	6.89655	4.69136	0.0279581	1	0.387546	1	1	1	1	1
	group_6304		hypothetical protein	190	81	3	6	98.4456	6.89655	4.69136	0.0279581	1	0.387546	1	1	1	1	1
	sbnA		putative siderophore biosynthesis protein SbnA	190	81	3	6	98.4456	6.89655	4.69136	0.0279581	1	0.387546	1	1	1	1	1
	group_6316		hypothetical protein	190	81	3	6	98.4456	6.89655	4.69136	0.0279581	1	0.387546	1	1	1	1	1
	group_6429		hypothetical protein	190	81	3	6	98.4456	6.89655	4.69136	0.0279581	1	0.387546	1	1	1	1	1
	group_6430		hypothetical protein	190	81	3	6	98.4456	6.89655	4.69136	0.0279581	1	0.387546	1	1	1	1	1
	impA		Immunomodulating metalloprotease	190	81	3	6	98.4456	6.89655	4.69136	0.0279581	1	0.387546	1	1	1	1	1
	group_6437		hypothetical protein	190	81	3	6	98.4456	6.89655	4.69136	0.0279581	1	0.387546	1	1	1	1	1
	group_6442		hypothetical protein	190	81	3	6	98.4456	6.89655	4.69136	0.0279581	1	0.387546	1	1	1	1	1
	yhaJ_4		HTH-type transcriptional regulator YhaJ	190	81	3	6	98.4456	6.89655	4.69136	0.0279581	1	0.387546	1	1	1	1	1
	group_6465		hypothetical protein	190	81	3	6	98.4456	6.89655	4.69136	0.0279581	1	0.387546	1	1	1	1	1
	hcaR_2		Hca operon transcriptional activator HcaR	190	81	3	6	98.4456	6.89655	4.69136	0.0279581	1	0.387546	1	1	1	1	1
	group_6652		hypothetical protein	190	81	3	6	98.4456	6.89655	4.69136	0.0279581	1	0.387546	1	1	1	1	1
	group_6658		Beta-lactamase OXA-133	190	81	3	6	98.4456	6.89655	4.69136	0.0279581	1	0.387546	1	1	1	1	1
	oatA_2		O-acetyltransferase OatA	190	81	3	6	98.4456	6.89655	4.69136	0.0279581	1	0.387546	1	1	1	1	1
	mdtK_1		Multidrug resistance protein MdtK	190	81	3	6	98.4456	6.89655	4.69136	0.0279581	1	0.387546	1	1	1	1	1
	alr		Alanine racemase, biosynthetic	190	81	3	6	98.4456	6.89655	4.69136	0.0279581	1	0.387546	1	1	1	1	1
	group_6678		hypothetical protein	190	81	3	6	98.4456	6.89655	4.69136	0.0279581	1	0.387546	1	1	1	1	1
	csgD		CsgBAC operon transcriptional regulatory protein	190	81	3	6	98.4456	6.89655	4.69136	0.0279581	1	0.387546	1	1	1	1	1
	ampC		Beta-lactamase	190	81	3	6	98.4456	6.89655	4.69136	0.0279581	1	0.387546	1	1	1	1	1
	group_7558		hypothetical protein	190	81	3	6	98.4456	6.89655	4.69136	0.0279581	1	0.387546	1	1	1	1	1
	group_7565		hypothetical protein	190	81	3	6	98.4456	6.89655	4.69136	0.0279581	1	0.387546	1	1	1	1	1
	ydjA		Putative NAD(P)H nitroreductase YdjA	190	81	3	6	98.4456	6.89655	4.69136	0.0279581	1	0.387546	1	1	1	1	1
	group_7587		hypothetical protein	190	81	3	6	98.4456	6.89655	4.69136	0.0279581	1	0.387546	1	1	1	1	1
	nylB'		6-aminohexanoate-dimer hydrolase	190	81	3	6	98.4456	6.89655	4.69136	0.0279581	1	0.387546	1	1	1	1	1
	pyrC_2		Dihydroorotase	190	81	3	6	98.4456	6.89655	4.69136	0.0279581	1	0.387546	1	1	1	1	1
	amiC_4		N-acetylmuramoyl-L-alanine amidase AmiC	190	81	3	6	98.4456	6.89655	4.69136	0.0279581	1	0.387546	1	1	1	1	1
	group_7601		hypothetical protein	190	81	3	6	98.4456	6.89655	4.69136	0.0279581	1	0.387546	1	1	1	1	1
	exuT_1		Hexuronate transporter	190	81	3	6	98.4456	6.89655	4.69136	0.0279581	1	0.387546	1	1	1	1	1
	group_7656		hypothetical protein	190	81	3	6	98.4456	6.89655	4.69136	0.0279581	1	0.387546	1	1	1	1	1
	group_7658		Actin-binding protein	190	81	3	6	98.4456	6.89655	4.69136	0.0279581	1	0.387546	1	1	1	1	1
	group_7660		putative FAD-linked oxidoreductase	190	81	3	6	98.4456	6.89655	4.69136	0.0279581	1	0.387546	1	1	1	1	1
	gcvA_5		Glycine cleavage system transcriptional activator	190	81	3	6	98.4456	6.89655	4.69136	0.0279581	1	0.387546	1	1	1	1	1
	mdtD		hypothetical protein	190	81	3	6	98.4456	6.89655	4.69136	0.0279581	1	0.387546	1	1	1	1	1
	entH		Proofreading thioesterase EntH	190	81	3	6	98.4456	6.89655	4.69136	0.0279581	1	0.387546	1	1	1	1	1
	acrR		HTH-type transcriptional regulator AcrR	190	81	3	6	98.4456	6.89655	4.69136	0.0279581	1	0.387546	1	1	1	1	1
	ureE		Urease accessory protein UreE	190	81	3	6	98.4456	6.89655	4.69136	0.0279581	1	0.387546	1	1	1	1	1
	pcaK_1		4-hydroxybenzoate transporter PcaK	190	81	3	6	98.4456	6.89655	4.69136	0.0279581	1	0.387546	1	1	1	1	1
	group_7766		putative protein	190	81	3	6	98.4456	6.89655	4.69136	0.0279581	1	0.387546	1	1	1	1	1
	elbB		Glyoxalase ElbB	190	81	3	6	98.4456	6.89655	4.69136	0.0279581	1	0.387546	1	1	1	1	1
	moeB		Molybdopterin-synthase adenylyltransferase	190	81	3	6	98.4456	6.89655	4.69136	0.0279581	1	0.387546	1	1	1	1	1
	phnP		Phosphoribosyl 1,2-cyclic phosphate phosphodiesterase	190	81	3	6	98.4456	6.89655	4.69136	0.0279581	1	0.387546	1	1	1	1	1
	group_7834		hypothetical protein	190	81	3	6	98.4456	6.89655	4.69136	0.0279581	1	0.387546	1	1	1	1	1
	group_7836		hypothetical protein	190	81	3	6	98.4456	6.89655	4.69136	0.0279581	1	0.387546	1	1	1	1	1
	lip1		Lipase 1	190	81	3	6	98.4456	6.89655	4.69136	0.0279581	1	0.387546	1	1	1	1	1
	group_7851		hypothetical protein	190	81	3	6	98.4456	6.89655	4.69136	0.0279581	1	0.387546	1	1	1	1	1
	group_7856		hypothetical protein	190	81	3	6	98.4456	6.89655	4.69136	0.0279581	1	0.387546	1	1	1	1	1
	pchA_2		Salicylate biosynthesis isochorismate synthase	190	81	3	6	98.4456	6.89655	4.69136	0.0279581	1	0.387546	1	1	1	1	1
	group_7877		hypothetical protein	190	81	3	6	98.4456	6.89655	4.69136	0.0279581	1	0.387546	1	1	1	1	1
	group_7879		hypothetical protein	190	81	3	6	98.4456	6.89655	4.69136	0.0279581	1	0.387546	1	1	1	1	1
	prsA		Foldase protein PrsA	190	81	3	6	98.4456	6.89655	4.69136	0.0279581	1	0.387546	1	1	1	1	1
	group_7881		hypothetical protein	190	81	3	6	98.4456	6.89655	4.69136	0.0279581	1	0.387546	1	1	1	1	1
	group_7902	puuB_1	Gamma-glutamylputrescine oxidoreductase	190	81	3	6	98.4456	6.89655	4.69136	0.0279581	1	0.387546	1	1	1	1	1
	group_7903		hypothetical protein	190	81	3	6	98.4456	6.89655	4.69136	0.0279581	1	0.387546	1	1	1	1	1
	group_7906		hypothetical protein	190	81	3	6	98.4456	6.89655	4.69136	0.0279581	1	0.387546	1	1	1	1	1
	garK		Glycerate 2-kinase	190	81	3	6	98.4456	6.89655	4.69136	0.0279581	1	0.387546	1	1	1	1	1
	mrpE		Na(+)/H(+) antiporter subunit E	190	81	3	6	98.4456	6.89655	4.69136	0.0279581	1	0.387546	1	1	1	1	1
	group_7912		hypothetical protein	190	81	3	6	98.4456	6.89655	4.69136	0.0279581	1	0.387546	1	1	1	1	1
	rluF		23S rRNA pseudouridine(2604) synthase	190	81	3	6	98.4456	6.89655	4.69136	0.0279581	1	0.387546	1	1	1	1	1
	group_7917		hypothetical protein	190	81	3	6	98.4456	6.89655	4.69136	0.0279581	1	0.387546	1	1	1	1	1
	group_7918		hypothetical protein	190	81	3	6	98.4456	6.89655	4.69136	0.0279581	1	0.387546	1	1	1	1	1
	group_7919		hypothetical protein	190	81	3	6	98.4456	6.89655	4.69136	0.0279581	1	0.387546	1	1	1	1	1
	group_7920		hypothetical protein	190	81	3	6	98.4456	6.89655	4.69136	0.0279581	1	0.387546	1	1	1	1	1
	group_8063		hypothetical protein	190	81	3	6	98.4456	6.89655	4.69136	0.0279581	1	0.387546	1	1	1	1	1
	trpI_2		HTH-type transcriptional regulator TrpI	190	81	3	6	98.4456	6.89655	4.69136	0.0279581	1	0.387546	1	1	1	1	1
	ble		Bleomycin resistance protein	190	81	3	6	98.4456	6.89655	4.69136	0.0279581	1	0.387546	1	1	1	1	1
	anmK		Anhydro-N-acetylmuramic acid kinase	190	81	3	6	98.4456	6.89655	4.69136	0.0279581	1	0.387546	1	1	1	1	1
	group_8100		hypothetical protein	190	81	3	6	98.4456	6.89655	4.69136	0.0279581	1	0.387546	1	1	1	1	1
	group_8104		hypothetical protein	190	81	3	6	98.4456	6.89655	4.69136	0.0279581	1	0.387546	1	1	1	1	1
	group_8105		hypothetical protein	190	81	3	6	98.4456	6.89655	4.69136	0.0279581	1	0.387546	1	1	1	1	1
	yxaF_2		putative HTH-type transcriptional regulator YxaF	190	81	3	6	98.4456	6.89655	4.69136	0.0279581	1	0.387546	1	1	1	1	1
	group_8115	yibF_2	putative GST-like protein YibF	190	81	3	6	98.4456	6.89655	4.69136	0.0279581	1	0.387546	1	1	1	1	1
	rlmI		Ribosomal RNA large subunit methyltransferase I	190	81	3	6	98.4456	6.89655	4.69136	0.0279581	1	0.387546	1	1	1	1	1
	dgcM_2		Diguanylate cyclase DgcM	190	81	3	6	98.4456	6.89655	4.69136	0.0279581	1	0.387546	1	1	1	1	1
	potA_5		Spermidine/putrescine import ATP-binding protein PotA	190	81	3	6	98.4456	6.89655	4.69136	0.0279581	1	0.387546	1	1	1	1	1
	potB_2		Spermidine/putrescine transport system permease protein PotB	190	81	3	6	98.4456	6.89655	4.69136	0.0279581	1	0.387546	1	1	1	1	1
	gadX		HTH-type transcriptional regulator GadX	190	81	3	6	98.4456	6.89655	4.69136	0.0279581	1	0.387546	1	1	1	1	1
	pcpR_6		PCP degradation transcriptional activation protein	190	81	3	6	98.4456	6.89655	4.69136	0.0279581	1	0.387546	1	1	1	1	1
	group_8147		hypothetical protein	190	81	3	6	98.4456	6.89655	4.69136	0.0279581	1	0.387546	1	1	1	1	1
	group_8151		hypothetical protein	190	81	3	6	98.4456	6.89655	4.69136	0.0279581	1	0.387546	1	1	1	1	1
	ppnP		Pyrimidine/purine nucleoside phosphorylase	190	81	3	6	98.4456	6.89655	4.69136	0.0279581	1	0.387546	1	1	1	1	1
	group_8190		hypothetical protein	190	81	3	6	98.4456	6.89655	4.69136	0.0279581	1	0.387546	4	2	3	0.625	1
	folE2		hypothetical protein	190	81	3	6	98.4456	6.89655	4.69136	0.0279581	1	0.387546	1	1	1	1	1
	group_8365		hypothetical protein	190	81	3	6	98.4456	6.89655	4.69136	0.0279581	1	0.387546	1	1	1	1	1
	group_8380		Putative esterase	190	81	3	6	98.4456	6.89655	4.69136	0.0279581	1	0.387546	1	1	1	1	1
	phnA_1		Anthranilate synthase component 1, pyocyanine specific	190	81	3	6	98.4456	6.89655	4.69136	0.0279581	1	0.387546	1	1	1	1	1
	spoT_2		Bifunctional (p)ppGpp synthase/hydrolase SpoT	190	81	3	6	98.4456	6.89655	4.69136	0.0279581	1	0.387546	1	1	1	1	1
	ftsY		Signal recognition particle receptor FtsY	190	81	3	6	98.4456	6.89655	4.69136	0.0279581	1	0.387546	1	1	1	1	1
	ydcV_3		Inner membrane ABC transporter permease protein YdcV	190	81	3	6	98.4456	6.89655	4.69136	0.0279581	1	0.387546	1	1	1	1	1
	hpaC		4-hydroxyphenylacetate 3-monooxygenase reductase component	190	81	3	6	98.4456	6.89655	4.69136	0.0279581	1	0.387546	1	1	1	1	1
	exuT_2		Hexuronate transporter	190	81	3	6	98.4456	6.89655	4.69136	0.0279581	1	0.387546	1	1	1	1	1
	bltD		Spermine/spermidine acetyltransferase	190	81	3	6	98.4456	6.89655	4.69136	0.0279581	1	0.387546	1	1	1	1	1
	neo		Aminoglycoside 3'-phosphotransferase	190	81	3	6	98.4456	6.89655	4.69136	0.0279581	1	0.387546	1	1	1	1	1
	amiR		Aliphatic amidase regulator	190	81	3	6	98.4456	6.89655	4.69136	0.0279581	1	0.387546	1	1	1	1	1
	group_9862		hypothetical protein	190	81	3	6	98.4456	6.89655	4.69136	0.0279581	1	0.387546	1	1	1	1	1
	group_9863		hypothetical protein	190	81	3	6	98.4456	6.89655	4.69136	0.0279581	1	0.387546	1	1	1	1	1
	group_9867		hypothetical protein	190	81	3	6	98.4456	6.89655	4.69136	0.0279581	1	0.387546	1	1	1	1	1
	group_9869		hypothetical protein	190	81	3	6	98.4456	6.89655	4.69136	0.0279581	1	0.387546	1	1	1	1	1
	ydhP_1		Inner membrane transport protein YdhP	190	81	3	6	98.4456	6.89655	4.69136	0.0279581	1	0.387546	1	1	1	1	1
	group_9871		hypothetical protein	190	81	3	6	98.4456	6.89655	4.69136	0.0279581	1	0.387546	1	1	1	1	1
	acpP_1		Acyl carrier protein	190	81	3	6	98.4456	6.89655	4.69136	0.0279581	1	0.387546	1	1	1	1	1
	group_9873		putative PhzA/B-like protein	190	81	3	6	98.4456	6.89655	4.69136	0.0279581	1	0.387546	1	1	1	1	1
	group_9874		hypothetical protein	190	81	3	6	98.4456	6.89655	4.69136	0.0279581	1	0.387546	1	1	1	1	1
	phnE_2		Phosphate-import permease protein PhnE	190	81	3	6	98.4456	6.89655	4.69136	0.0279581	1	0.387546	1	1	1	1	1
	group_9878		hypothetical protein	190	81	3	6	98.4456	6.89655	4.69136	0.0279581	1	0.387546	1	1	1	1	1
	group_9879		hypothetical protein	190	81	3	6	98.4456	6.89655	4.69136	0.0279581	1	0.387546	1	1	1	1	1
	group_9884		hypothetical protein	190	81	3	6	98.4456	6.89655	4.69136	0.0279581	1	0.387546	1	1	1	1	1
	virS_1		HTH-type transcriptional regulator VirS	190	81	3	6	98.4456	6.89655	4.69136	0.0279581	1	0.387546	1	1	1	1	1
	mcbR		HTH-type transcriptional regulator McbR	190	81	3	6	98.4456	6.89655	4.69136	0.0279581	1	0.387546	1	1	1	1	1
	puuA_1		Gamma-glutamylputrescine synthetase PuuA	190	81	3	6	98.4456	6.89655	4.69136	0.0279581	1	0.387546	1	1	1	1	1
	rtcB_1		RNA-splicing ligase RtcB	190	81	3	6	98.4456	6.89655	4.69136	0.0279581	1	0.387546	1	1	1	1	1
	group_9947	adaA	HTH-type transcriptional activator Btr	190	81	3	6	98.4456	6.89655	4.69136	0.0279581	1	0.387546	1	1	1	1	1
	aroQ1_2		3-dehydroquinate dehydratase 1	190	81	3	6	98.4456	6.89655	4.69136	0.0279581	1	0.387546	1	1	1	1	1
	group_11422	trxA_1	Thioredoxin	3	6	190	81	1.5544	93.1034	0.213158	0.0279581	1	0.387546	1	1	1	1	1
	group_11423		hypothetical protein	3	6	190	81	1.5544	93.1034	0.213158	0.0279581	1	0.387546	1	1	1	1	1
	gfa		Glutathione-dependent formaldehyde-activating enzyme	3	6	190	81	1.5544	93.1034	0.213158	0.0279581	1	0.387546	1	1	1	1	1
	group_11426		hypothetical protein	3	6	190	81	1.5544	93.1034	0.213158	0.0279581	1	0.387546	1	1	1	1	1
	group_11427	fecR_5	Protein FecR	3	6	190	81	1.5544	93.1034	0.213158	0.0279581	1	0.387546	1	1	1	1	1
	group_11428	ldcC	Constitutive lysine decarboxylase	3	6	190	81	1.5544	93.1034	0.213158	0.0279581	1	0.387546	1	1	1	1	1
	group_11429		hypothetical protein	3	6	190	81	1.5544	93.1034	0.213158	0.0279581	1	0.387546	1	1	1	1	1
	smvA		Methyl viologen resistance protein SmvA	3	6	190	81	1.5544	93.1034	0.213158	0.0279581	1	0.387546	1	1	1	1	1
	group_11431	pspB	Putative phosphoserine phosphatase 2	3	6	190	81	1.5544	93.1034	0.213158	0.0279581	1	0.387546	1	1	1	1	1
	group_11432	wprA	Cell wall-associated protease	3	6	190	81	1.5544	93.1034	0.213158	0.0279581	1	0.387546	1	1	1	1	1
	group_11433	syrM1	HTH-type transcriptional regulator SyrM 1	3	6	190	81	1.5544	93.1034	0.213158	0.0279581	1	0.387546	1	1	1	1	1
	group_11435		hypothetical protein	3	6	190	81	1.5544	93.1034	0.213158	0.0279581	1	0.387546	1	1	1	1	1
	group_11436	cobB_2	NAD-dependent protein deacylase	3	6	190	81	1.5544	93.1034	0.213158	0.0279581	1	0.387546	1	1	1	1	1
	group_11437		hypothetical protein	3	6	190	81	1.5544	93.1034	0.213158	0.0279581	1	0.387546	1	1	1	1	1
	group_11438		hypothetical protein	3	6	190	81	1.5544	93.1034	0.213158	0.0279581	1	0.387546	1	1	1	1	1
	group_11439	rluF	23S rRNA pseudouridine(2604) synthase	3	6	190	81	1.5544	93.1034	0.213158	0.0279581	1	0.387546	1	1	1	1	1
	group_11441		hypothetical protein	3	6	190	81	1.5544	93.1034	0.213158	0.0279581	1	0.387546	1	1	1	1	1
	group_11442		hypothetical protein	3	6	190	81	1.5544	93.1034	0.213158	0.0279581	1	0.387546	1	1	1	1	1
	group_11443		hypothetical protein	3	6	190	81	1.5544	93.1034	0.213158	0.0279581	1	0.387546	1	1	1	1	1
	group_11444	phnA_1	Anthranilate synthase component 1, pyocyanine specific	3	6	190	81	1.5544	93.1034	0.213158	0.0279581	1	0.387546	1	1	1	1	1
	group_11446	yadV_3	putative fimbrial chaperone YadV	3	6	190	81	1.5544	93.1034	0.213158	0.0279581	1	0.387546	1	1	1	1	1
	group_11447		hypothetical protein	3	6	190	81	1.5544	93.1034	0.213158	0.0279581	1	0.387546	1	1	1	1	1
	group_11448	bvgS_4	Virulence sensor protein BvgS	3	6	190	81	1.5544	93.1034	0.213158	0.0279581	1	0.387546	1	1	1	1	1
	group_11449		Zinc-type alcohol dehydrogenase-like protein	3	6	190	81	1.5544	93.1034	0.213158	0.0279581	1	0.387546	1	1	1	1	1
	group_11451	lcdH_1	L-carnitine dehydrogenase	3	6	190	81	1.5544	93.1034	0.213158	0.0279581	1	0.387546	1	1	1	1	1
	group_11454	yejM	Inner membrane protein YejM	3	6	190	81	1.5544	93.1034	0.213158	0.0279581	1	0.387546	1	1	1	1	1
	group_11455		hypothetical protein	3	6	190	81	1.5544	93.1034	0.213158	0.0279581	1	0.387546	1	1	1	1	1
	group_11459		hypothetical protein	3	6	190	81	1.5544	93.1034	0.213158	0.0279581	1	0.387546	1	1	1	1	1
	group_11461		hypothetical protein	3	6	190	81	1.5544	93.1034	0.213158	0.0279581	1	0.387546	1	1	1	1	1
	group_11468		hypothetical protein	3	6	190	81	1.5544	93.1034	0.213158	0.0279581	1	0.387546	1	1	1	1	1
	group_11469		hypothetical protein	3	6	190	81	1.5544	93.1034	0.213158	0.0279581	1	0.387546	1	1	1	1	1
	panM		PanD regulatory factor	3	6	190	81	1.5544	93.1034	0.213158	0.0279581	1	0.387546	1	1	1	1	1
	yfiH_2		Polyphenol oxidase	3	6	190	81	1.5544	93.1034	0.213158	0.0279581	1	0.387546	1	1	1	1	1
	group_11485		hypothetical protein	3	6	190	81	1.5544	93.1034	0.213158	0.0279581	1	0.387546	1	1	1	1	1
	pilE_1		Fimbrial protein	3	6	190	81	1.5544	93.1034	0.213158	0.0279581	1	0.387546	1	1	1	1	1
	group_11489	oprJ	Outer membrane protein OprJ	3	6	190	81	1.5544	93.1034	0.213158	0.0279581	1	0.387546	1	1	1	1	1
	group_11491		hypothetical protein	3	6	190	81	1.5544	93.1034	0.213158	0.0279581	1	0.387546	1	1	1	1	1
	group_11493		hypothetical protein	3	6	190	81	1.5544	93.1034	0.213158	0.0279581	1	0.387546	1	1	1	1	1
	group_11494		hypothetical protein	3	6	190	81	1.5544	93.1034	0.213158	0.0279581	1	0.387546	1	1	1	1	1
	group_11496		hypothetical protein	3	6	190	81	1.5544	93.1034	0.213158	0.0279581	1	0.387546	1	1	1	1	1
	group_11517		hypothetical protein	3	6	190	81	1.5544	93.1034	0.213158	0.0279581	1	0.387546	1	1	1	1	1
	group_11518		2-(acetamidomethylene)succinate hydrolase	3	6	190	81	1.5544	93.1034	0.213158	0.0279581	1	0.387546	1	1	1	1	1
	group_11520		hypothetical protein	3	6	190	81	1.5544	93.1034	0.213158	0.0279581	1	0.387546	1	1	1	1	1
	group_11521		hypothetical protein	3	6	190	81	1.5544	93.1034	0.213158	0.0279581	1	0.387546	1	1	1	1	1
	group_11522		hypothetical protein	3	6	190	81	1.5544	93.1034	0.213158	0.0279581	1	0.387546	1	1	1	1	1
	group_11523		hypothetical protein	3	6	190	81	1.5544	93.1034	0.213158	0.0279581	1	0.387546	1	1	1	1	1
	group_11524	rmd	GDP-6-deoxy-D-mannose reductase	3	6	190	81	1.5544	93.1034	0.213158	0.0279581	1	0.387546	1	1	1	1	1
	group_11526	puuB_7	Gamma-glutamylputrescine oxidoreductase	3	6	190	81	1.5544	93.1034	0.213158	0.0279581	1	0.387546	1	1	1	1	1
	group_11527		hypothetical protein	3	6	190	81	1.5544	93.1034	0.213158	0.0279581	1	0.387546	1	1	1	1	1
	group_11528	xcpV_2	Type II secretion system protein I	3	6	190	81	1.5544	93.1034	0.213158	0.0279581	1	0.387546	1	1	1	1	1
	group_11529		hypothetical protein	3	6	190	81	1.5544	93.1034	0.213158	0.0279581	1	0.387546	1	1	1	1	1
	group_11530		hypothetical protein	3	6	190	81	1.5544	93.1034	0.213158	0.0279581	1	0.387546	1	1	1	1	1
	group_11533		hypothetical protein	3	6	190	81	1.5544	93.1034	0.213158	0.0279581	1	0.387546	1	1	1	1	1
	group_11535	echA8	putative enoyl-CoA hydratase echA8	3	6	190	81	1.5544	93.1034	0.213158	0.0279581	1	0.387546	1	1	1	1	1
	group_11536	nicP_2	Porin-like protein NicP	3	6	190	81	1.5544	93.1034	0.213158	0.0279581	1	0.387546	1	1	1	1	1
	group_11537		hypothetical protein	3	6	190	81	1.5544	93.1034	0.213158	0.0279581	1	0.387546	1	1	1	1	1
	group_11559		hypothetical protein	3	6	190	81	1.5544	93.1034	0.213158	0.0279581	1	0.387546	1	1	1	1	1
	group_11561		hypothetical protein	3	6	190	81	1.5544	93.1034	0.213158	0.0279581	1	0.387546	1	1	1	1	1
	group_11562	fecR_8	Protein FecR	3	6	190	81	1.5544	93.1034	0.213158	0.0279581	1	0.387546	1	1	1	1	1
	oprD_4		Porin D	3	6	190	81	1.5544	93.1034	0.213158	0.0279581	1	0.387546	1	1	1	1	1
	group_11565	mdcG	Phosphoribosyl-dephospho-CoA transferase	3	6	190	81	1.5544	93.1034	0.213158	0.0279581	1	0.387546	1	1	1	1	1
	group_11566		hypothetical protein	3	6	190	81	1.5544	93.1034	0.213158	0.0279581	1	0.387546	1	1	1	1	1
	group_11568	bmr3	Multidrug resistance protein 3	3	6	190	81	1.5544	93.1034	0.213158	0.0279581	1	0.387546	1	1	1	1	1
	group_11569	marR_1	Multiple antibiotic resistance protein MarR	3	6	190	81	1.5544	93.1034	0.213158	0.0279581	1	0.387546	1	1	1	1	1
	group_11570		hypothetical protein	3	6	190	81	1.5544	93.1034	0.213158	0.0279581	1	0.387546	1	1	1	1	1
	group_11573	esiB_2	Secretory immunoglobulin A-binding protein EsiB	3	6	190	81	1.5544	93.1034	0.213158	0.0279581	1	0.387546	1	1	1	1	1
	group_11574	ftsY	Signal recognition particle receptor FtsY	3	6	190	81	1.5544	93.1034	0.213158	0.0279581	1	0.387546	1	1	1	1	1
	group_11575		hypothetical protein	3	6	190	81	1.5544	93.1034	0.213158	0.0279581	1	0.387546	1	1	1	1	1
	group_11576		hypothetical protein	3	6	190	81	1.5544	93.1034	0.213158	0.0279581	1	0.387546	1	1	1	1	1
	group_11577		hypothetical protein	3	6	190	81	1.5544	93.1034	0.213158	0.0279581	1	0.387546	1	1	1	1	1
	group_11578		hypothetical protein	3	6	190	81	1.5544	93.1034	0.213158	0.0279581	1	0.387546	1	1	1	1	1
	group_11579		hypothetical protein	3	6	190	81	1.5544	93.1034	0.213158	0.0279581	1	0.387546	1	1	1	1	1
	group_11581	impA	Immunomodulating metalloprotease	3	6	190	81	1.5544	93.1034	0.213158	0.0279581	1	0.387546	1	1	1	1	1
	group_11583		hypothetical protein	3	6	190	81	1.5544	93.1034	0.213158	0.0279581	1	0.387546	1	1	1	1	1
	group_11584		hypothetical protein	3	6	190	81	1.5544	93.1034	0.213158	0.0279581	1	0.387546	1	1	1	1	1
	group_11585		hypothetical protein	3	6	190	81	1.5544	93.1034	0.213158	0.0279581	1	0.387546	1	1	1	1	1
	group_11586	anmK	Anhydro-N-acetylmuramic acid kinase	3	6	190	81	1.5544	93.1034	0.213158	0.0279581	1	0.387546	1	1	1	1	1
	group_11587		hypothetical protein	3	6	190	81	1.5544	93.1034	0.213158	0.0279581	1	0.387546	1	1	1	1	1
	group_11589	oatA_2	hypothetical protein	3	6	190	81	1.5544	93.1034	0.213158	0.0279581	1	0.387546	1	1	1	1	1
	group_11590		hypothetical protein	3	6	190	81	1.5544	93.1034	0.213158	0.0279581	1	0.387546	1	1	1	1	1
	group_11592		hypothetical protein	3	6	190	81	1.5544	93.1034	0.213158	0.0279581	1	0.387546	1	1	1	1	1
	group_11596		hypothetical protein	3	6	190	81	1.5544	93.1034	0.213158	0.0279581	1	0.387546	1	1	1	1	1
	group_11603	menH_1	Tropinesterase	3	6	190	81	1.5544	93.1034	0.213158	0.0279581	1	0.387546	1	1	1	1	1
	nicF		Maleamate amidohydrolase	3	6	190	81	1.5544	93.1034	0.213158	0.0279581	1	0.387546	1	1	1	1	1
	group_11605		Putative thiazole biosynthetic enzyme	3	6	190	81	1.5544	93.1034	0.213158	0.0279581	1	0.387546	1	1	1	1	1
	prpR		Propionate catabolism operon regulatory protein	3	6	190	81	1.5544	93.1034	0.213158	0.0279581	1	0.387546	1	1	1	1	1
	group_11608		hypothetical protein	3	6	190	81	1.5544	93.1034	0.213158	0.0279581	1	0.387546	1	1	1	1	1
	gcvA_7		Glycine cleavage system transcriptional activator	3	6	190	81	1.5544	93.1034	0.213158	0.0279581	1	0.387546	1	1	1	1	1
	group_11621		hypothetical protein	3	6	190	81	1.5544	93.1034	0.213158	0.0279581	1	0.387546	1	1	1	1	1
	yfiH_1		Polyphenol oxidase	3	6	190	81	1.5544	93.1034	0.213158	0.0279581	1	0.387546	1	1	1	1	1
	group_11625		hypothetical protein	3	6	190	81	1.5544	93.1034	0.213158	0.0279581	1	0.387546	1	1	1	1	1
	group_11626		hypothetical protein	3	6	190	81	1.5544	93.1034	0.213158	0.0279581	1	0.387546	1	1	1	1	1
	group_11627		hypothetical protein	3	6	190	81	1.5544	93.1034	0.213158	0.0279581	1	0.387546	1	1	1	1	1
	xylP		Isoprimeverose transporter	3	6	190	81	1.5544	93.1034	0.213158	0.0279581	1	0.387546	1	1	1	1	1
	group_11640		hypothetical protein	3	6	190	81	1.5544	93.1034	0.213158	0.0279581	1	0.387546	1	1	1	1	1
	group_11642		hypothetical protein	3	6	190	81	1.5544	93.1034	0.213158	0.0279581	1	0.387546	1	1	1	1	1
	group_11643	dmlR_5	HTH-type transcriptional regulator DmlR	3	6	190	81	1.5544	93.1034	0.213158	0.0279581	1	0.387546	1	1	1	1	1
	group_11650	aaeX_3	Protein AaeX	3	6	190	81	1.5544	93.1034	0.213158	0.0279581	1	0.387546	1	1	1	1	1
	group_11654	yjaB_1	putative N-acetyltransferase YjaB	3	6	190	81	1.5544	93.1034	0.213158	0.0279581	1	0.387546	1	1	1	1	1
	group_11656		hypothetical protein	3	6	190	81	1.5544	93.1034	0.213158	0.0279581	1	0.387546	1	1	1	1	1
	group_11657	fadR	Fatty acid metabolism regulator protein	3	6	190	81	1.5544	93.1034	0.213158	0.0279581	1	0.387546	1	1	1	1	1
	group_11658		hypothetical protein	3	6	190	81	1.5544	93.1034	0.213158	0.0279581	1	0.387546	1	1	1	1	1
	group_11661		hypothetical protein	3	6	190	81	1.5544	93.1034	0.213158	0.0279581	1	0.387546	1	1	1	1	1
	group_11665		hypothetical protein	3	6	190	81	1.5544	93.1034	0.213158	0.0279581	1	0.387546	1	1	1	1	1
	group_11666		hypothetical protein	3	6	190	81	1.5544	93.1034	0.213158	0.0279581	1	0.387546	1	1	1	1	1
	group_11668		hypothetical protein	3	6	190	81	1.5544	93.1034	0.213158	0.0279581	1	0.387546	1	1	1	1	1
	group_11671	ureE	Urease accessory protein UreE	3	6	190	81	1.5544	93.1034	0.213158	0.0279581	1	0.387546	1	1	1	1	1
	group_11672	genK	Gentisate transporter	3	6	190	81	1.5544	93.1034	0.213158	0.0279581	1	0.387546	1	1	1	1	1
	group_11673		Thermolabile hemolysin	3	6	190	81	1.5544	93.1034	0.213158	0.0279581	1	0.387546	1	1	1	1	1
	group_11674		putative signaling protein	3	6	190	81	1.5544	93.1034	0.213158	0.0279581	1	0.387546	1	1	1	1	1
	group_11676		hypothetical protein	3	6	190	81	1.5544	93.1034	0.213158	0.0279581	1	0.387546	1	1	1	1	1
	group_11677		hypothetical protein	3	6	190	81	1.5544	93.1034	0.213158	0.0279581	1	0.387546	1	1	1	1	1
	group_11686	cobK	Precorrin-6A reductase	3	6	190	81	1.5544	93.1034	0.213158	0.0279581	1	0.387546	1	1	1	1	1
	group_11688		hypothetical protein	3	6	190	81	1.5544	93.1034	0.213158	0.0279581	1	0.387546	1	1	1	1	1
	group_11702	petE	Plastocyanin	3	6	190	81	1.5544	93.1034	0.213158	0.0279581	1	0.387546	1	1	1	1	1
	group_11703		hypothetical protein	3	6	190	81	1.5544	93.1034	0.213158	0.0279581	1	0.387546	1	1	1	1	1
	group_11704		hypothetical protein	3	6	190	81	1.5544	93.1034	0.213158	0.0279581	1	0.387546	1	1	1	1	1
	group_11706	estB_2	Esterase EstB	3	6	190	81	1.5544	93.1034	0.213158	0.0279581	1	0.387546	1	1	1	1	1
	group_11719		putative HTH-type transcriptional regulator	3	6	190	81	1.5544	93.1034	0.213158	0.0279581	1	0.387546	1	1	1	1	1
	group_11723	htrE	Outer membrane usher protein HtrE	3	6	190	81	1.5544	93.1034	0.213158	0.0279581	1	0.387546	1	1	1	1	1
	group_11724	hemL_1	Glutamate-1-semialdehyde 2,1-aminomutase	3	6	190	81	1.5544	93.1034	0.213158	0.0279581	1	0.387546	1	1	1	1	1
	group_11725		hypothetical protein	3	6	190	81	1.5544	93.1034	0.213158	0.0279581	1	0.387546	1	1	1	1	1
	group_11726	exuT_1	Hexuronate transporter	3	6	190	81	1.5544	93.1034	0.213158	0.0279581	1	0.387546	1	1	1	1	1
	group_11727		hypothetical protein	3	6	190	81	1.5544	93.1034	0.213158	0.0279581	1	0.387546	1	1	1	1	1
	dmlR_8		HTH-type transcriptional regulator DmlR	3	6	190	81	1.5544	93.1034	0.213158	0.0279581	1	0.387546	1	1	1	1	1
	group_11729	eamB_1	Cysteine/O-acetylserine efflux protein	3	6	190	81	1.5544	93.1034	0.213158	0.0279581	1	0.387546	1	1	1	1	1
	group_11731	dkgB	2,5-diketo-D-gluconic acid reductase B	3	6	190	81	1.5544	93.1034	0.213158	0.0279581	1	0.387546	1	1	1	1	1
	group_11732	yfkM	General stress protein 18	3	6	190	81	1.5544	93.1034	0.213158	0.0279581	1	0.387546	1	1	1	1	1
	group_11733		hypothetical protein	3	6	190	81	1.5544	93.1034	0.213158	0.0279581	1	0.387546	1	1	1	1	1
	group_11734		hypothetical protein	3	6	190	81	1.5544	93.1034	0.213158	0.0279581	1	0.387546	1	1	1	1	1
	group_11736	paiB	Protease synthase and sporulation protein PAI 2	3	6	190	81	1.5544	93.1034	0.213158	0.0279581	1	0.387546	1	1	1	1	1
	gbpA		GlcNAc-binding protein A	3	6	190	81	1.5544	93.1034	0.213158	0.0279581	1	0.387546	1	1	1	1	1
	group_11740		hypothetical protein	3	6	190	81	1.5544	93.1034	0.213158	0.0279581	1	0.387546	1	1	1	1	1
	xcpW_3		Type II secretion system protein J	3	6	190	81	1.5544	93.1034	0.213158	0.0279581	1	0.387546	1	1	1	1	1
	group_11742		hypothetical protein	3	6	190	81	1.5544	93.1034	0.213158	0.0279581	1	0.387546	1	1	1	1	1
	group_11743	pdeG	putative cyclic di-GMP phosphodiesterase PdeG	3	6	190	81	1.5544	93.1034	0.213158	0.0279581	1	0.387546	1	1	1	1	1
	group_11746	lgrD_2	Linear gramicidin synthase subunit D	3	6	190	81	1.5544	93.1034	0.213158	0.0279581	1	0.387546	1	1	1	1	1
	group_11994		hypothetical protein	3	6	190	81	1.5544	93.1034	0.213158	0.0279581	1	0.387546	7	3	5	0.453125	1
	group_11995		hypothetical protein	3	6	190	81	1.5544	93.1034	0.213158	0.0279581	1	0.387546	7	3	5	0.453125	1
	group_12310	dnaX	DNA polymerase III subunit tau	3	6	190	81	1.5544	93.1034	0.213158	0.0279581	1	0.387546	1	1	1	1	1
	group_1258		hypothetical protein	3	6	190	81	1.5544	93.1034	0.213158	0.0279581	1	0.387546	7	3	4	1	1
	group_15598		hypothetical protein	3	6	190	81	1.5544	93.1034	0.213158	0.0279581	1	0.387546	8	2	6	0.289062	0.289062
	group_15875	degU_1	Transcriptional regulatory protein DegU	3	6	190	81	1.5544	93.1034	0.213158	0.0279581	1	0.387546	1	1	1	1	1
	group_15876		putative methyltransferase	3	6	190	81	1.5544	93.1034	0.213158	0.0279581	1	0.387546	1	1	1	1	1
	group_15878	ompR_1	Transcriptional regulatory protein OmpR	3	6	190	81	1.5544	93.1034	0.213158	0.0279581	1	0.387546	1	1	1	1	1
	group_15879	pfeS_1	Sensor protein PfeS	3	6	190	81	1.5544	93.1034	0.213158	0.0279581	1	0.387546	1	1	1	1	1
	group_15880		Putative HTH-type transcriptional regulator	3	6	190	81	1.5544	93.1034	0.213158	0.0279581	1	0.387546	1	1	1	1	1
	group_15881		hypothetical protein	3	6	190	81	1.5544	93.1034	0.213158	0.0279581	1	0.387546	1	1	1	1	1
	group_15882	cysK	Cysteine synthase A	3	6	190	81	1.5544	93.1034	0.213158	0.0279581	1	0.387546	1	1	1	1	1
	group_15883	rhtC_1	Threonine efflux protein	3	6	190	81	1.5544	93.1034	0.213158	0.0279581	1	0.387546	1	1	1	1	1
	group_15884		NADH oxidase	3	6	190	81	1.5544	93.1034	0.213158	0.0279581	1	0.387546	1	1	1	1	1
	group_15885		hypothetical protein	3	6	190	81	1.5544	93.1034	0.213158	0.0279581	1	0.387546	1	1	1	1	1
	group_15886		hypothetical protein	3	6	190	81	1.5544	93.1034	0.213158	0.0279581	1	0.387546	1	1	1	1	1
	group_15887		hypothetical protein	3	6	190	81	1.5544	93.1034	0.213158	0.0279581	1	0.387546	1	1	1	1	1
	group_15888		hypothetical protein	3	6	190	81	1.5544	93.1034	0.213158	0.0279581	1	0.387546	1	1	1	1	1
	group_15889		putative HTH-type transcriptional regulator	3	6	190	81	1.5544	93.1034	0.213158	0.0279581	1	0.387546	1	1	1	1	1
	group_15890		Putative enoyl-CoA hydratase EchA13	3	6	190	81	1.5544	93.1034	0.213158	0.0279581	1	0.387546	1	1	1	1	1
	menE		2-succinylbenzoate--CoA ligase	3	6	190	81	1.5544	93.1034	0.213158	0.0279581	1	0.387546	1	1	1	1	1
	yqjC_1		Protein YqjC	3	6	190	81	1.5544	93.1034	0.213158	0.0279581	1	0.387546	1	1	1	1	1
	group_15894	cusB	Cation efflux system protein CusB	3	6	190	81	1.5544	93.1034	0.213158	0.0279581	1	0.387546	1	1	1	1	1
	group_15895	cusA	Cation efflux system protein CusA	3	6	190	81	1.5544	93.1034	0.213158	0.0279581	1	0.387546	1	1	1	1	1
	fecI_5		putative RNA polymerase sigma factor FecI	3	6	190	81	1.5544	93.1034	0.213158	0.0279581	1	0.387546	1	1	1	1	1
	group_15897		hypothetical protein	3	6	190	81	1.5544	93.1034	0.213158	0.0279581	1	0.387546	1	1	1	1	1
	group_15898		hypothetical protein	3	6	190	81	1.5544	93.1034	0.213158	0.0279581	1	0.387546	1	1	1	1	1
	group_15899		hypothetical protein	3	6	190	81	1.5544	93.1034	0.213158	0.0279581	1	0.387546	1	1	1	1	1
	group_15900		hypothetical protein	3	6	190	81	1.5544	93.1034	0.213158	0.0279581	1	0.387546	1	1	1	1	1
	group_15901		hypothetical protein	3	6	190	81	1.5544	93.1034	0.213158	0.0279581	1	0.387546	1	1	1	1	1
	group_15902		hypothetical protein	3	6	190	81	1.5544	93.1034	0.213158	0.0279581	1	0.387546	1	1	1	1	1
	group_15903	nemA_1	N-ethylmaleimide reductase	3	6	190	81	1.5544	93.1034	0.213158	0.0279581	1	0.387546	1	1	1	1	1
	group_15904	ephD_1	putative oxidoreductase EphD	3	6	190	81	1.5544	93.1034	0.213158	0.0279581	1	0.387546	1	1	1	1	1
	group_15905		hypothetical protein	3	6	190	81	1.5544	93.1034	0.213158	0.0279581	1	0.387546	1	1	1	1	1
	group_15906	pgrR_1	HTH-type transcriptional regulator PgrR	3	6	190	81	1.5544	93.1034	0.213158	0.0279581	1	0.387546	1	1	1	1	1
	group_15907	bfrD_1	putative TonB-dependent receptor BfrD	3	6	190	81	1.5544	93.1034	0.213158	0.0279581	1	0.387546	1	1	1	1	1
	group_15908		hypothetical protein	3	6	190	81	1.5544	93.1034	0.213158	0.0279581	1	0.387546	1	1	1	1	1
	group_15910	fecI_2	putative RNA polymerase sigma factor FecI	3	6	190	81	1.5544	93.1034	0.213158	0.0279581	1	0.387546	1	1	1	1	1
	group_15911	sseB	Putative thiosulfate sulfurtransferase SseB	3	6	190	81	1.5544	93.1034	0.213158	0.0279581	1	0.387546	1	1	1	1	1
	group_15912		hypothetical protein	3	6	190	81	1.5544	93.1034	0.213158	0.0279581	1	0.387546	1	1	1	1	1
	fadL_2		Long-chain fatty acid transport protein	3	6	190	81	1.5544	93.1034	0.213158	0.0279581	1	0.387546	1	1	1	1	1
	group_15914		4-hydroxyproline 2-epimerase	3	6	190	81	1.5544	93.1034	0.213158	0.0279581	1	0.387546	1	1	1	1	1
	group_15915	hcnC_1	Hydrogen cyanide synthase subunit HcnC	3	6	190	81	1.5544	93.1034	0.213158	0.0279581	1	0.387546	1	1	1	1	1
	group_15916	hcnA_1	Hydrogen cyanide synthase subunit HcnA	3	6	190	81	1.5544	93.1034	0.213158	0.0279581	1	0.387546	1	1	1	1	1
	group_15917		Alpha-ketoglutaric semialdehyde dehydrogenase	3	6	190	81	1.5544	93.1034	0.213158	0.0279581	1	0.387546	1	1	1	1	1
	mcpQ_4		Methyl-accepting chemotaxis protein McpQ	3	6	190	81	1.5544	93.1034	0.213158	0.0279581	1	0.387546	1	1	1	1	1
	group_15919	inh	Proteinase inhibitor	3	6	190	81	1.5544	93.1034	0.213158	0.0279581	1	0.387546	1	1	1	1	1
	group_15920	tolC_1	Outer membrane protein TolC	3	6	190	81	1.5544	93.1034	0.213158	0.0279581	1	0.387546	1	1	1	1	1
	prsE_2		Type I secretion system membrane fusion protein PrsE	3	6	190	81	1.5544	93.1034	0.213158	0.0279581	1	0.387546	1	1	1	1	1
	group_15922		hypothetical protein	3	6	190	81	1.5544	93.1034	0.213158	0.0279581	1	0.387546	1	1	1	1	1
	group_15923	proP_1	Proline/betaine transporter	3	6	190	81	1.5544	93.1034	0.213158	0.0279581	1	0.387546	1	1	1	1	1
	group_15924		Blue-light-activated protein	3	6	190	81	1.5544	93.1034	0.213158	0.0279581	1	0.387546	1	1	1	1	1
	group_15926		hypothetical protein	3	6	190	81	1.5544	93.1034	0.213158	0.0279581	1	0.387546	1	1	1	1	1
	group_15928	aaeB_2	p-hydroxybenzoic acid efflux pump subunit AaeB	3	6	190	81	1.5544	93.1034	0.213158	0.0279581	1	0.387546	1	1	1	1	1
	group_15929	aaeA_1	p-hydroxybenzoic acid efflux pump subunit AaeA	3	6	190	81	1.5544	93.1034	0.213158	0.0279581	1	0.387546	1	1	1	1	1
	group_15930		hypothetical protein	3	6	190	81	1.5544	93.1034	0.213158	0.0279581	1	0.387546	1	1	1	1	1
	nimR_9		HTH-type transcriptional regulator NimR	3	6	190	81	1.5544	93.1034	0.213158	0.0279581	1	0.387546	1	1	1	1	1
	group_15932		hypothetical protein	3	6	190	81	1.5544	93.1034	0.213158	0.0279581	1	0.387546	1	1	1	1	1
	group_15933		hypothetical protein	3	6	190	81	1.5544	93.1034	0.213158	0.0279581	1	0.387546	1	1	1	1	1
	betI_2		HTH-type transcriptional regulator BetI	3	6	190	81	1.5544	93.1034	0.213158	0.0279581	1	0.387546	1	1	1	1	1
	group_15935	kefF_1	Glutathione-regulated potassium-efflux system ancillary protein KefF	3	6	190	81	1.5544	93.1034	0.213158	0.0279581	1	0.387546	1	1	1	1	1
	group_15936		hypothetical protein	3	6	190	81	1.5544	93.1034	0.213158	0.0279581	1	0.387546	1	1	1	1	1
	group_15938	mltA	Membrane-bound lytic murein transglycosylase A	3	6	190	81	1.5544	93.1034	0.213158	0.0279581	1	0.387546	1	1	1	1	1
	group_15939	ethA	FAD-containing monooxygenase EthA	3	6	190	81	1.5544	93.1034	0.213158	0.0279581	1	0.387546	1	1	1	1	1
	group_15940		hypothetical protein	3	6	190	81	1.5544	93.1034	0.213158	0.0279581	1	0.387546	1	1	1	1	1
	group_15941	cat_1	Chloramphenicol acetyltransferase	3	6	190	81	1.5544	93.1034	0.213158	0.0279581	1	0.387546	1	1	1	1	1
	djlA_1		hypothetical protein	3	6	190	81	1.5544	93.1034	0.213158	0.0279581	1	0.387546	1	1	1	1	1
	group_15943	sprT	Protein SprT	3	6	190	81	1.5544	93.1034	0.213158	0.0279581	1	0.387546	1	1	1	1	1
	group_15944	yfdE_1	Acetyl-CoA:oxalate CoA-transferase	3	6	190	81	1.5544	93.1034	0.213158	0.0279581	1	0.387546	1	1	1	1	1
	group_15945		putative protein	3	6	190	81	1.5544	93.1034	0.213158	0.0279581	1	0.387546	1	1	1	1	1
	group_15946	yfcG_4	Disulfide-bond oxidoreductase YfcG	3	6	190	81	1.5544	93.1034	0.213158	0.0279581	1	0.387546	1	1	1	1	1
	group_15947	gcvA_1	Glycine cleavage system transcriptional activator	3	6	190	81	1.5544	93.1034	0.213158	0.0279581	1	0.387546	1	1	1	1	1
	group_15948	dgcE	putative diguanylate cyclase DgcE	3	6	190	81	1.5544	93.1034	0.213158	0.0279581	1	0.387546	1	1	1	1	1
	group_15949		hypothetical protein	3	6	190	81	1.5544	93.1034	0.213158	0.0279581	1	0.387546	1	1	1	1	1
	group_15950		hypothetical protein	3	6	190	81	1.5544	93.1034	0.213158	0.0279581	1	0.387546	1	1	1	1	1
	group_15951		hypothetical protein	3	6	190	81	1.5544	93.1034	0.213158	0.0279581	1	0.387546	1	1	1	1	1
	group_15952	yhdN_1	Aldo-keto reductase YhdN	3	6	190	81	1.5544	93.1034	0.213158	0.0279581	1	0.387546	1	1	1	1	1
	group_15953	dgt_2	Deoxyguanosinetriphosphate triphosphohydrolase	3	6	190	81	1.5544	93.1034	0.213158	0.0279581	1	0.387546	1	1	1	1	1
	group_15954	def_1	Peptide deformylase	3	6	190	81	1.5544	93.1034	0.213158	0.0279581	1	0.387546	1	1	1	1	1
	group_15955	yiaD_3	putative lipoprotein YiaD	3	6	190	81	1.5544	93.1034	0.213158	0.0279581	1	0.387546	1	1	1	1	1
	group_15956		hypothetical protein	3	6	190	81	1.5544	93.1034	0.213158	0.0279581	1	0.387546	1	1	1	1	1
	group_15957	ltaS	Lipoteichoic acid synthase	3	6	190	81	1.5544	93.1034	0.213158	0.0279581	1	0.387546	1	1	1	1	1
	group_15958		hypothetical protein	3	6	190	81	1.5544	93.1034	0.213158	0.0279581	1	0.387546	1	1	1	1	1
	group_15959		DNA-binding protein	3	6	190	81	1.5544	93.1034	0.213158	0.0279581	1	0.387546	1	1	1	1	1
	group_15960	yliI	Aldose sugar dehydrogenase YliI	3	6	190	81	1.5544	93.1034	0.213158	0.0279581	1	0.387546	1	1	1	1	1
	group_15961		hypothetical protein	3	6	190	81	1.5544	93.1034	0.213158	0.0279581	1	0.387546	1	1	1	1	1
	group_15962	nimR_2	HTH-type transcriptional regulator NimR	3	6	190	81	1.5544	93.1034	0.213158	0.0279581	1	0.387546	1	1	1	1	1
	group_15963	fliH	Flagellar assembly protein FliH	3	6	190	81	1.5544	93.1034	0.213158	0.0279581	1	0.387546	1	1	1	1	1
	group_15964	atoS_2	Signal transduction histidine-protein kinase AtoS	3	6	190	81	1.5544	93.1034	0.213158	0.0279581	1	0.387546	1	1	1	1	1
	group_15973		hypothetical protein	3	6	190	81	1.5544	93.1034	0.213158	0.0279581	1	0.387546	1	1	1	1	1
	group_15974	dmlR_2	HTH-type transcriptional regulator DmlR	3	6	190	81	1.5544	93.1034	0.213158	0.0279581	1	0.387546	1	1	1	1	1
	group_15975		hypothetical protein	3	6	190	81	1.5544	93.1034	0.213158	0.0279581	1	0.387546	1	1	1	1	1
	group_15976		hypothetical protein	3	6	190	81	1.5544	93.1034	0.213158	0.0279581	1	0.387546	1	1	1	1	1
	mnhE1		Na(+)/H(+) antiporter subunit E1	3	6	190	81	1.5544	93.1034	0.213158	0.0279581	1	0.387546	1	1	1	1	1
	group_15978	garK	Glycerate 2-kinase	3	6	190	81	1.5544	93.1034	0.213158	0.0279581	1	0.387546	1	1	1	1	1
	group_15979	cdaR	Carbohydrate diacid regulator	3	6	190	81	1.5544	93.1034	0.213158	0.0279581	1	0.387546	1	1	1	1	1
	group_15980		hypothetical protein	3	6	190	81	1.5544	93.1034	0.213158	0.0279581	1	0.387546	1	1	1	1	1
	group_15981		hypothetical protein	3	6	190	81	1.5544	93.1034	0.213158	0.0279581	1	0.387546	1	1	1	1	1
	group_15982		hypothetical protein	3	6	190	81	1.5544	93.1034	0.213158	0.0279581	1	0.387546	1	1	1	1	1
	group_15983		hypothetical protein	3	6	190	81	1.5544	93.1034	0.213158	0.0279581	1	0.387546	1	1	1	1	1
	group_15984		hypothetical protein	3	6	190	81	1.5544	93.1034	0.213158	0.0279581	1	0.387546	1	1	1	1	1
	group_15985		hypothetical protein	3	6	190	81	1.5544	93.1034	0.213158	0.0279581	1	0.387546	1	1	1	1	1
	yfcG_2		Disulfide-bond oxidoreductase YfcG	3	6	190	81	1.5544	93.1034	0.213158	0.0279581	1	0.387546	1	1	1	1	1
	group_15987		hypothetical protein	3	6	190	81	1.5544	93.1034	0.213158	0.0279581	1	0.387546	1	1	1	1	1
	group_15988	smc_2	Chromosome partition protein Smc	3	6	190	81	1.5544	93.1034	0.213158	0.0279581	1	0.387546	1	1	1	1	1
	group_15989		hypothetical protein	3	6	190	81	1.5544	93.1034	0.213158	0.0279581	1	0.387546	1	1	1	1	1
	group_15990	puuB_1	Gamma-glutamylputrescine oxidoreductase	3	6	190	81	1.5544	93.1034	0.213158	0.0279581	1	0.387546	1	1	1	1	1
	group_15991		hypothetical protein	3	6	190	81	1.5544	93.1034	0.213158	0.0279581	1	0.387546	1	1	1	1	1
	group_15992		Putative short-chain type dehydrogenase/reductase	3	6	190	81	1.5544	93.1034	0.213158	0.0279581	1	0.387546	1	1	1	1	1
	group_15993		Putative acyl-CoA dehydrogenase FadE17	3	6	190	81	1.5544	93.1034	0.213158	0.0279581	1	0.387546	1	1	1	1	1
	group_15994	paaF_2	2,3-dehydroadipyl-CoA hydratase	3	6	190	81	1.5544	93.1034	0.213158	0.0279581	1	0.387546	1	1	1	1	1
	group_15995	acrC_1	Acyl-CoA dehydrogenase FadE27	3	6	190	81	1.5544	93.1034	0.213158	0.0279581	1	0.387546	1	1	1	1	1
	group_15996		hypothetical protein	3	6	190	81	1.5544	93.1034	0.213158	0.0279581	1	0.387546	1	1	1	1	1
	group_15997		hypothetical protein	3	6	190	81	1.5544	93.1034	0.213158	0.0279581	1	0.387546	1	1	1	1	1
	group_15998	pat_1	Protein lysine acetyltransferase Pat	3	6	190	81	1.5544	93.1034	0.213158	0.0279581	1	0.387546	1	1	1	1	1
	fadI_1		3-ketoacyl-CoA thiolase	3	6	190	81	1.5544	93.1034	0.213158	0.0279581	1	0.387546	1	1	1	1	1
	group_16000	allR	HTH-type transcriptional repressor AllR	3	6	190	81	1.5544	93.1034	0.213158	0.0279581	1	0.387546	1	1	1	1	1
	group_16001	glnQ_1	Glutamine transport ATP-binding protein GlnQ	3	6	190	81	1.5544	93.1034	0.213158	0.0279581	1	0.387546	1	1	1	1	1
	glnP_1		Glutamine transport system permease protein GlnP	3	6	190	81	1.5544	93.1034	0.213158	0.0279581	1	0.387546	1	1	1	1	1
	group_16003	yecS_1	L-cystine transport system permease protein YecS	3	6	190	81	1.5544	93.1034	0.213158	0.0279581	1	0.387546	1	1	1	1	1
	group_16004		putative amino-acid ABC transporter-binding protein	3	6	190	81	1.5544	93.1034	0.213158	0.0279581	1	0.387546	1	1	1	1	1
	group_16005	norG_3	HTH-type transcriptional regulator NorG	3	6	190	81	1.5544	93.1034	0.213158	0.0279581	1	0.387546	1	1	1	1	1
	tdcB_1		L-threonine dehydratase catabolic TdcB	3	6	190	81	1.5544	93.1034	0.213158	0.0279581	1	0.387546	1	1	1	1	1
	arcB_1		Delta(1)-pyrroline-2-carboxylate reductase	3	6	190	81	1.5544	93.1034	0.213158	0.0279581	1	0.387546	1	1	1	1	1
	doeA		Ectoine hydrolase	3	6	190	81	1.5544	93.1034	0.213158	0.0279581	1	0.387546	1	1	1	1	1
	doeB		N-alpha-acetyl-L-2,4-diaminobutyric acid deacetylase	3	6	190	81	1.5544	93.1034	0.213158	0.0279581	1	0.387546	1	1	1	1	1
	group_16010	lrp_1	Leucine-responsive regulatory protein	3	6	190	81	1.5544	93.1034	0.213158	0.0279581	1	0.387546	1	1	1	1	1
	davD_1		Glutarate-semialdehyde dehydrogenase DavD	3	6	190	81	1.5544	93.1034	0.213158	0.0279581	1	0.387546	1	1	1	1	1
	group_16012	spuC_1	Putrescine--pyruvate aminotransferase	3	6	190	81	1.5544	93.1034	0.213158	0.0279581	1	0.387546	1	1	1	1	1
	group_16013	bcp	Peroxiredoxin Bcp	3	6	190	81	1.5544	93.1034	0.213158	0.0279581	1	0.387546	1	1	1	1	1
	group_16014	phnB	Anthranilate synthase component 2, pyocyanine specific	3	6	190	81	1.5544	93.1034	0.213158	0.0279581	1	0.387546	1	1	1	1	1
	group_16015	pqsA	Anthranilate--CoA ligase	3	6	190	81	1.5544	93.1034	0.213158	0.0279581	1	0.387546	1	1	1	1	1
	group_16016	ogt	Methylated-DNA--protein-cysteine methyltransferase	3	6	190	81	1.5544	93.1034	0.213158	0.0279581	1	0.387546	1	1	1	1	1
	group_16018	fimD	Outer membrane usher protein FimD	3	6	190	81	1.5544	93.1034	0.213158	0.0279581	1	0.387546	1	1	1	1	1
	group_16019	bvgS_2	Virulence sensor protein BvgS	3	6	190	81	1.5544	93.1034	0.213158	0.0279581	1	0.387546	1	1	1	1	1
	group_16020		hypothetical protein	3	6	190	81	1.5544	93.1034	0.213158	0.0279581	1	0.387546	1	1	1	1	1
	group_16021	betA_1	Oxygen-dependent choline dehydrogenase	3	6	190	81	1.5544	93.1034	0.213158	0.0279581	1	0.387546	1	1	1	1	1
	group_16022		putative PhzA/B-like protein	3	6	190	81	1.5544	93.1034	0.213158	0.0279581	1	0.387546	1	1	1	1	1
	xylB_1		Aryl-alcohol dehydrogenase	3	6	190	81	1.5544	93.1034	0.213158	0.0279581	1	0.387546	1	1	1	1	1
	group_16024	fpvA_1	Ferripyoverdine receptor	3	6	190	81	1.5544	93.1034	0.213158	0.0279581	1	0.387546	1	1	1	1	1
	irtB_1		Iron import ATP-binding/permease protein IrtB	3	6	190	81	1.5544	93.1034	0.213158	0.0279581	1	0.387546	1	1	1	1	1
	group_16026	irtA	Iron import ATP-binding/permease protein IrtA	3	6	190	81	1.5544	93.1034	0.213158	0.0279581	1	0.387546	1	1	1	1	1
	group_16027		hypothetical protein	3	6	190	81	1.5544	93.1034	0.213158	0.0279581	1	0.387546	1	1	1	1	1
	mhpC		2-hydroxy-6-oxononadienedioate/2-hydroxy-6-oxononatrienedioate hydrolase	3	6	190	81	1.5544	93.1034	0.213158	0.0279581	1	0.387546	1	1	1	1	1
	group_16029	cspA_2	Major cold shock protein CspA	3	6	190	81	1.5544	93.1034	0.213158	0.0279581	1	0.387546	1	1	1	1	1
	group_16030	slyX	Protein SlyX	3	6	190	81	1.5544	93.1034	0.213158	0.0279581	1	0.387546	1	1	1	1	1
	group_16031		hypothetical protein	3	6	190	81	1.5544	93.1034	0.213158	0.0279581	1	0.387546	1	1	1	1	1
	group_16032		hypothetical protein	3	6	190	81	1.5544	93.1034	0.213158	0.0279581	1	0.387546	1	1	1	1	1
	yccX		Acylphosphatase	3	6	190	81	1.5544	93.1034	0.213158	0.0279581	1	0.387546	1	1	1	1	1
	group_16034	resA_1	Thiol-disulfide oxidoreductase ResA	3	6	190	81	1.5544	93.1034	0.213158	0.0279581	1	0.387546	1	1	1	1	1
	group_16035		hypothetical protein	3	6	190	81	1.5544	93.1034	0.213158	0.0279581	1	0.387546	1	1	1	1	1
	group_16036		hypothetical protein	3	6	190	81	1.5544	93.1034	0.213158	0.0279581	1	0.387546	1	1	1	1	1
	group_16037	yfgD	putative protein YfgD	3	6	190	81	1.5544	93.1034	0.213158	0.0279581	1	0.387546	1	1	1	1	1
	group_16038		hypothetical protein	3	6	190	81	1.5544	93.1034	0.213158	0.0279581	1	0.387546	1	1	1	1	1
	group_16039		hypothetical protein	3	6	190	81	1.5544	93.1034	0.213158	0.0279581	1	0.387546	1	1	1	1	1
	group_16040		hypothetical protein	3	6	190	81	1.5544	93.1034	0.213158	0.0279581	1	0.387546	1	1	1	1	1
	group_16041		hypothetical protein	3	6	190	81	1.5544	93.1034	0.213158	0.0279581	1	0.387546	1	1	1	1	1
	group_16042		hypothetical protein	3	6	190	81	1.5544	93.1034	0.213158	0.0279581	1	0.387546	1	1	1	1	1
	group_16043	rof	Protein rof	3	6	190	81	1.5544	93.1034	0.213158	0.0279581	1	0.387546	1	1	1	1	1
	group_16046	mazG	Nucleoside triphosphate pyrophosphohydrolase	3	6	190	81	1.5544	93.1034	0.213158	0.0279581	1	0.387546	1	1	1	1	1
	group_16047	rlmD	23S rRNA (uracil(1939)-C(5))-methyltransferase RlmD	3	6	190	81	1.5544	93.1034	0.213158	0.0279581	1	0.387546	1	1	1	1	1
	group_16048	pfeS_2	Sensor protein PfeS	3	6	190	81	1.5544	93.1034	0.213158	0.0279581	1	0.387546	1	1	1	1	1
	baeR		Transcriptional regulatory protein BaeR	3	6	190	81	1.5544	93.1034	0.213158	0.0279581	1	0.387546	1	1	1	1	1
	group_16050		hypothetical protein	3	6	190	81	1.5544	93.1034	0.213158	0.0279581	1	0.387546	1	1	1	1	1
	group_16051		hypothetical protein	3	6	190	81	1.5544	93.1034	0.213158	0.0279581	1	0.387546	1	1	1	1	1
	group_16052	mprF	Phosphatidylglycerol lysyltransferase	3	6	190	81	1.5544	93.1034	0.213158	0.0279581	1	0.387546	1	1	1	1	1
	group_16053		hypothetical protein	3	6	190	81	1.5544	93.1034	0.213158	0.0279581	1	0.387546	1	1	1	1	1
	group_16054	yodB_1	Cytochrome b561	3	6	190	81	1.5544	93.1034	0.213158	0.0279581	1	0.387546	1	1	1	1	1
	group_16066		hypothetical protein	3	6	190	81	1.5544	93.1034	0.213158	0.0279581	1	0.387546	1	1	1	1	1
	group_16067	astE	Succinylglutamate desuccinylase	3	6	190	81	1.5544	93.1034	0.213158	0.0279581	1	0.387546	1	1	1	1	1
	group_16068	dctQ_1	C4-dicarboxylate TRAP transporter small permease protein DctQ	3	6	190	81	1.5544	93.1034	0.213158	0.0279581	1	0.387546	1	1	1	1	1
	shlA		Hemolysin	3	6	190	81	1.5544	93.1034	0.213158	0.0279581	1	0.387546	1	1	1	1	1
	group_16070	mas	Mycocerosic acid synthase	3	6	190	81	1.5544	93.1034	0.213158	0.0279581	1	0.387546	1	1	1	1	1
	group_16071		hypothetical protein	3	6	190	81	1.5544	93.1034	0.213158	0.0279581	1	0.387546	1	1	1	1	1
	group_16072		hypothetical protein	3	6	190	81	1.5544	93.1034	0.213158	0.0279581	1	0.387546	1	1	1	1	1
	tdcB_2		L-threonine dehydratase catabolic TdcB	3	6	190	81	1.5544	93.1034	0.213158	0.0279581	1	0.387546	1	1	1	1	1
	group_16074		hypothetical protein	3	6	190	81	1.5544	93.1034	0.213158	0.0279581	1	0.387546	1	1	1	1	1
	group_16075		putative signaling protein	3	6	190	81	1.5544	93.1034	0.213158	0.0279581	1	0.387546	1	1	1	1	1
	group_16088		hypothetical protein	3	6	190	81	1.5544	93.1034	0.213158	0.0279581	1	0.387546	1	1	1	1	1
	group_16102	puuR_3	HTH-type transcriptional regulator PuuR	3	6	190	81	1.5544	93.1034	0.213158	0.0279581	1	0.387546	1	1	1	1	1
	group_16103		Multidrug transporter	3	6	190	81	1.5544	93.1034	0.213158	0.0279581	1	0.387546	1	1	1	1	1
	group_16104	yhdN_2	Aldo-keto reductase YhdN	3	6	190	81	1.5544	93.1034	0.213158	0.0279581	1	0.387546	1	1	1	1	1
	group_16105		hypothetical protein	3	6	190	81	1.5544	93.1034	0.213158	0.0279581	1	0.387546	1	1	1	1	1
	group_16106		hypothetical protein	3	6	190	81	1.5544	93.1034	0.213158	0.0279581	1	0.387546	1	1	1	1	1
	group_16107		hypothetical protein	3	6	190	81	1.5544	93.1034	0.213158	0.0279581	1	0.387546	1	1	1	1	1
	group_16108		hypothetical protein	3	6	190	81	1.5544	93.1034	0.213158	0.0279581	1	0.387546	1	1	1	1	1
	mcpQ_6		Methyl-accepting chemotaxis protein McpQ	3	6	190	81	1.5544	93.1034	0.213158	0.0279581	1	0.387546	1	1	1	1	1
	group_16112	dadA1_3	D-amino acid dehydrogenase 1	3	6	190	81	1.5544	93.1034	0.213158	0.0279581	1	0.387546	1	1	1	1	1
	group_16113	hutI	Imidazolonepropionase	3	6	190	81	1.5544	93.1034	0.213158	0.0279581	1	0.387546	1	1	1	1	1
	group_16114	hutH_2	Histidine ammonia-lyase	3	6	190	81	1.5544	93.1034	0.213158	0.0279581	1	0.387546	1	1	1	1	1
	group_16115	ousX_2	Glycine betaine-binding periplasmic protein OusX	3	6	190	81	1.5544	93.1034	0.213158	0.0279581	1	0.387546	1	1	1	1	1
	group_16116	ousX_1	Glycine betaine-binding periplasmic protein OusX	3	6	190	81	1.5544	93.1034	0.213158	0.0279581	1	0.387546	1	1	1	1	1
	group_16117	ves	Protein Ves	3	6	190	81	1.5544	93.1034	0.213158	0.0279581	1	0.387546	1	1	1	1	1
	group_16118		hypothetical protein	3	6	190	81	1.5544	93.1034	0.213158	0.0279581	1	0.387546	1	1	1	1	1
	group_16119		hypothetical protein	3	6	190	81	1.5544	93.1034	0.213158	0.0279581	1	0.387546	1	1	1	1	1
	group_16120	soxR_2	Redox-sensitive transcriptional activator SoxR	3	6	190	81	1.5544	93.1034	0.213158	0.0279581	1	0.387546	1	1	1	1	1
	group_16121		hypothetical protein	3	6	190	81	1.5544	93.1034	0.213158	0.0279581	1	0.387546	1	1	1	1	1
	group_16122		hypothetical protein	3	6	190	81	1.5544	93.1034	0.213158	0.0279581	1	0.387546	1	1	1	1	1
	group_16123		hypothetical protein	3	6	190	81	1.5544	93.1034	0.213158	0.0279581	1	0.387546	1	1	1	1	1
	group_16124	lhgO	L-2-hydroxyglutarate oxidase LhgO	3	6	190	81	1.5544	93.1034	0.213158	0.0279581	1	0.387546	1	1	1	1	1
	zraS_1		Sensor protein ZraS	3	6	190	81	1.5544	93.1034	0.213158	0.0279581	1	0.387546	1	1	1	1	1
	group_16134	thiO	Glycine oxidase	3	6	190	81	1.5544	93.1034	0.213158	0.0279581	1	0.387546	1	1	1	1	1
	group_16135		hypothetical protein	3	6	190	81	1.5544	93.1034	0.213158	0.0279581	1	0.387546	1	1	1	1	1
	group_16136		hypothetical protein	3	6	190	81	1.5544	93.1034	0.213158	0.0279581	1	0.387546	1	1	1	1	1
	group_16137		hypothetical protein	3	6	190	81	1.5544	93.1034	0.213158	0.0279581	1	0.387546	1	1	1	1	1
	group_16138		hypothetical protein	3	6	190	81	1.5544	93.1034	0.213158	0.0279581	1	0.387546	1	1	1	1	1
	group_16139		hypothetical protein	3	6	190	81	1.5544	93.1034	0.213158	0.0279581	1	0.387546	1	1	1	1	1
	group_16140	murJ_1	putative lipid II flippase MurJ	3	6	190	81	1.5544	93.1034	0.213158	0.0279581	1	0.387546	1	1	1	1	1
	adhB		Alcohol dehydrogenase (quinone), cytochrome c subunit	3	6	190	81	1.5544	93.1034	0.213158	0.0279581	1	0.387546	1	1	1	1	1
	group_16142	ybiA	N-glycosidase YbiA	3	6	190	81	1.5544	93.1034	0.213158	0.0279581	1	0.387546	1	1	1	1	1
	group_16143		hypothetical protein	3	6	190	81	1.5544	93.1034	0.213158	0.0279581	1	0.387546	1	1	1	1	1
	group_16147	yknY	putative ABC transporter ATP-binding protein YknY	3	6	190	81	1.5544	93.1034	0.213158	0.0279581	1	0.387546	1	1	1	1	1
	group_16148		hypothetical protein	3	6	190	81	1.5544	93.1034	0.213158	0.0279581	1	0.387546	1	1	1	1	1
	group_16149	acrA	Multidrug efflux pump subunit AcrA	3	6	190	81	1.5544	93.1034	0.213158	0.0279581	1	0.387546	1	1	1	1	1
	group_16150		hypothetical protein	3	6	190	81	1.5544	93.1034	0.213158	0.0279581	1	0.387546	1	1	1	1	1
	group_16151		hypothetical protein	3	6	190	81	1.5544	93.1034	0.213158	0.0279581	1	0.387546	1	1	1	1	1
	group_16152		hypothetical protein	3	6	190	81	1.5544	93.1034	0.213158	0.0279581	1	0.387546	1	1	1	1	1
	group_16156		hypothetical protein	3	6	190	81	1.5544	93.1034	0.213158	0.0279581	1	0.387546	1	1	1	1	1
	group_16157	amiR	Aliphatic amidase regulator	3	6	190	81	1.5544	93.1034	0.213158	0.0279581	1	0.387546	1	1	1	1	1
	group_16158		hypothetical protein	3	6	190	81	1.5544	93.1034	0.213158	0.0279581	1	0.387546	1	1	1	1	1
	group_16159		hypothetical protein	3	6	190	81	1.5544	93.1034	0.213158	0.0279581	1	0.387546	1	1	1	1	1
	group_16160	ycgR_1	Flagellar brake protein YcgR	3	6	190	81	1.5544	93.1034	0.213158	0.0279581	1	0.387546	1	1	1	1	1
	group_16161		hypothetical protein	3	6	190	81	1.5544	93.1034	0.213158	0.0279581	1	0.387546	1	1	1	1	1
	group_16162		hypothetical protein	3	6	190	81	1.5544	93.1034	0.213158	0.0279581	1	0.387546	1	1	1	1	1
	group_16163		hypothetical protein	3	6	190	81	1.5544	93.1034	0.213158	0.0279581	1	0.387546	1	1	1	1	1
	cph2_1		Phytochrome-like protein cph2	3	6	190	81	1.5544	93.1034	0.213158	0.0279581	1	0.387546	1	1	1	1	1
	group_16165		hypothetical protein	3	6	190	81	1.5544	93.1034	0.213158	0.0279581	1	0.387546	1	1	1	1	1
	group_16166		hypothetical protein	3	6	190	81	1.5544	93.1034	0.213158	0.0279581	1	0.387546	1	1	1	1	1
	group_16167	hldD	ADP-L-glycero-D-manno-heptose-6-epimerase	3	6	190	81	1.5544	93.1034	0.213158	0.0279581	1	0.387546	1	1	1	1	1
	group_16168	clpP_2	ATP-dependent Clp protease proteolytic subunit	3	6	190	81	1.5544	93.1034	0.213158	0.0279581	1	0.387546	1	1	1	1	1
	group_16169		hypothetical protein	3	6	190	81	1.5544	93.1034	0.213158	0.0279581	1	0.387546	1	1	1	1	1
	group_16170		hypothetical protein	3	6	190	81	1.5544	93.1034	0.213158	0.0279581	1	0.387546	1	1	1	1	1
	group_16171	phnE_2	Phosphate-import permease protein PhnE	3	6	190	81	1.5544	93.1034	0.213158	0.0279581	1	0.387546	1	1	1	1	1
	group_16172		hypothetical protein	3	6	190	81	1.5544	93.1034	0.213158	0.0279581	1	0.387546	1	1	1	1	1
	pbuE		Purine efflux pump PbuE	3	6	190	81	1.5544	93.1034	0.213158	0.0279581	1	0.387546	1	1	1	1	1
	group_16174		Monoacylglycerol lipase	3	6	190	81	1.5544	93.1034	0.213158	0.0279581	1	0.387546	1	1	1	1	1
	group_16175	hit_2	Protein hit	3	6	190	81	1.5544	93.1034	0.213158	0.0279581	1	0.387546	1	1	1	1	1
	group_16176		hypothetical protein	3	6	190	81	1.5544	93.1034	0.213158	0.0279581	1	0.387546	1	1	1	1	1
	group_16177		hypothetical protein	3	6	190	81	1.5544	93.1034	0.213158	0.0279581	1	0.387546	1	1	1	1	1
	group_16178		hypothetical protein	3	6	190	81	1.5544	93.1034	0.213158	0.0279581	1	0.387546	1	1	1	1	1
	group_16179		hypothetical protein	3	6	190	81	1.5544	93.1034	0.213158	0.0279581	1	0.387546	1	1	1	1	1
	group_16180		hypothetical protein	3	6	190	81	1.5544	93.1034	0.213158	0.0279581	1	0.387546	1	1	1	1	1
	group_16181		hypothetical protein	3	6	190	81	1.5544	93.1034	0.213158	0.0279581	1	0.387546	1	1	1	1	1
	group_16182		hypothetical protein	3	6	190	81	1.5544	93.1034	0.213158	0.0279581	1	0.387546	1	1	1	1	1
	group_16184		hypothetical protein	3	6	190	81	1.5544	93.1034	0.213158	0.0279581	1	0.387546	1	1	1	1	1
	group_16185	hisJ	putative histidine-binding protein	3	6	190	81	1.5544	93.1034	0.213158	0.0279581	1	0.387546	1	1	1	1	1
	group_16186		hypothetical protein	3	6	190	81	1.5544	93.1034	0.213158	0.0279581	1	0.387546	1	1	1	1	1
	group_16187		hypothetical protein	3	6	190	81	1.5544	93.1034	0.213158	0.0279581	1	0.387546	1	1	1	1	1
	group_16189		hypothetical protein	3	6	190	81	1.5544	93.1034	0.213158	0.0279581	1	0.387546	1	1	1	1	1
	group_16190	yijE_2	putative cystine transporter YijE	3	6	190	81	1.5544	93.1034	0.213158	0.0279581	1	0.387546	1	1	1	1	1
	group_16191	exsA_1	Exoenzyme S synthesis regulatory protein ExsA	3	6	190	81	1.5544	93.1034	0.213158	0.0279581	1	0.387546	1	1	1	1	1
	group_16192	mgtA_2	GDP-mannose-dependent alpha-mannosyltransferase	3	6	190	81	1.5544	93.1034	0.213158	0.0279581	1	0.387546	1	1	1	1	1
	group_16193	virS_1	HTH-type transcriptional regulator VirS	3	6	190	81	1.5544	93.1034	0.213158	0.0279581	1	0.387546	1	1	1	1	1
	group_16194		hypothetical protein	3	6	190	81	1.5544	93.1034	0.213158	0.0279581	1	0.387546	1	1	1	1	1
	group_16195	ydjA	Putative NAD(P)H nitroreductase YdjA	3	6	190	81	1.5544	93.1034	0.213158	0.0279581	1	0.387546	1	1	1	1	1
	group_16196		hypothetical protein	3	6	190	81	1.5544	93.1034	0.213158	0.0279581	1	0.387546	1	1	1	1	1
	group_16197		hypothetical protein	3	6	190	81	1.5544	93.1034	0.213158	0.0279581	1	0.387546	1	1	1	1	1
	group_16199	glk	Glucokinase	3	6	190	81	1.5544	93.1034	0.213158	0.0279581	1	0.387546	1	1	1	1	1
	group_16200		Putative 2-dehydropantoate 2-reductase	3	6	190	81	1.5544	93.1034	0.213158	0.0279581	1	0.387546	1	1	1	1	1
	group_16201		hypothetical protein	3	6	190	81	1.5544	93.1034	0.213158	0.0279581	1	0.387546	1	1	1	1	1
	group_16202	fadB_1	putative enoyl-CoA hydratase	3	6	190	81	1.5544	93.1034	0.213158	0.0279581	1	0.387546	1	1	1	1	1
	group_16203		hypothetical protein	3	6	190	81	1.5544	93.1034	0.213158	0.0279581	1	0.387546	1	1	1	1	1
	group_16204		hypothetical protein	3	6	190	81	1.5544	93.1034	0.213158	0.0279581	1	0.387546	1	1	1	1	1
	group_16205		hypothetical protein	3	6	190	81	1.5544	93.1034	0.213158	0.0279581	1	0.387546	1	1	1	1	1
	guaA_2		GMP synthase [glutamine-hydrolyzing]	3	6	190	81	1.5544	93.1034	0.213158	0.0279581	1	0.387546	1	1	1	1	1
	group_16207	pknD	Serine/threonine-protein kinase PknD	3	6	190	81	1.5544	93.1034	0.213158	0.0279581	1	0.387546	1	1	1	1	1
	group_16208	alkA	putative bifunctional transcriptional activator/DNA repair enzyme AlkA	3	6	190	81	1.5544	93.1034	0.213158	0.0279581	1	0.387546	1	1	1	1	1
	group_16209	estD	Esterase EstD	3	6	190	81	1.5544	93.1034	0.213158	0.0279581	1	0.387546	1	1	1	1	1
	group_16210	sttH_1	Streptothricin hydrolase	3	6	190	81	1.5544	93.1034	0.213158	0.0279581	1	0.387546	1	1	1	1	1
	group_16211		hypothetical protein	3	6	190	81	1.5544	93.1034	0.213158	0.0279581	1	0.387546	1	1	1	1	1
	group_16216		hypothetical protein	3	6	190	81	1.5544	93.1034	0.213158	0.0279581	1	0.387546	1	1	1	1	1
	group_16217		putative sulfate transporter	3	6	190	81	1.5544	93.1034	0.213158	0.0279581	1	0.387546	1	1	1	1	1
	group_16218		hypothetical protein	3	6	190	81	1.5544	93.1034	0.213158	0.0279581	1	0.387546	1	1	1	1	1
	adc		Acetoacetate decarboxylase	3	6	190	81	1.5544	93.1034	0.213158	0.0279581	1	0.387546	1	1	1	1	1
	group_16220		hypothetical protein	3	6	190	81	1.5544	93.1034	0.213158	0.0279581	1	0.387546	1	1	1	1	1
	group_16221	kdpC	Potassium-transporting ATPase KdpC subunit	3	6	190	81	1.5544	93.1034	0.213158	0.0279581	1	0.387546	1	1	1	1	1
	tsaQ1		HTH-type transcriptional regulator TsaQ1/TsaQ2	3	6	190	81	1.5544	93.1034	0.213158	0.0279581	1	0.387546	1	1	1	1	1
	group_16223		hypothetical protein	3	6	190	81	1.5544	93.1034	0.213158	0.0279581	1	0.387546	1	1	1	1	1
	group_16224	rhtC_2	Threonine efflux protein	3	6	190	81	1.5544	93.1034	0.213158	0.0279581	1	0.387546	1	1	1	1	1
	group_16225	cirA_1	Colicin I receptor	3	6	190	81	1.5544	93.1034	0.213158	0.0279581	1	0.387546	1	1	1	1	1
	group_16226		hypothetical protein	3	6	190	81	1.5544	93.1034	0.213158	0.0279581	1	0.387546	1	1	1	1	1
	group_16227		hypothetical protein	3	6	190	81	1.5544	93.1034	0.213158	0.0279581	1	0.387546	1	1	1	1	1
	group_16228	nicB_2	Nicotinate dehydrogenase subunit B	3	6	190	81	1.5544	93.1034	0.213158	0.0279581	1	0.387546	1	1	1	1	1
	group_16229		hypothetical protein	3	6	190	81	1.5544	93.1034	0.213158	0.0279581	1	0.387546	1	1	1	1	1
	group_16230		hypothetical protein	3	6	190	81	1.5544	93.1034	0.213158	0.0279581	1	0.387546	1	1	1	1	1
	group_16231		hypothetical protein	3	6	190	81	1.5544	93.1034	0.213158	0.0279581	1	0.387546	1	1	1	1	1
	group_16232	ppnP	Pyrimidine/purine nucleoside phosphorylase	3	6	190	81	1.5544	93.1034	0.213158	0.0279581	1	0.387546	1	1	1	1	1
	group_16233		hypothetical protein	3	6	190	81	1.5544	93.1034	0.213158	0.0279581	1	0.387546	1	1	1	1	1
	mcbR_2		HTH-type transcriptional regulator McbR	3	6	190	81	1.5544	93.1034	0.213158	0.0279581	1	0.387546	1	1	1	1	1
	group_16251	puuA_5	Gamma-glutamylputrescine synthetase PuuA	3	6	190	81	1.5544	93.1034	0.213158	0.0279581	1	0.387546	1	1	1	1	1
	group_16252		Beta-lactamase OXA-133	3	6	190	81	1.5544	93.1034	0.213158	0.0279581	1	0.387546	1	1	1	1	1
	group_16253		hypothetical protein	3	6	190	81	1.5544	93.1034	0.213158	0.0279581	1	0.387546	1	1	1	1	1
	group_16254	thrB	Homoserine kinase	3	6	190	81	1.5544	93.1034	0.213158	0.0279581	1	0.387546	1	1	1	1	1
	pleD_6		Response regulator PleD	3	6	190	81	1.5544	93.1034	0.213158	0.0279581	1	0.387546	1	1	1	1	1
	amiD_3		N-acetylmuramoyl-L-alanine amidase AmiD	3	6	190	81	1.5544	93.1034	0.213158	0.0279581	1	0.387546	1	1	1	1	1
	mrkD		Fimbria adhesin protein	3	6	190	81	1.5544	93.1034	0.213158	0.0279581	1	0.387546	1	1	1	1	1
	group_16258		hypothetical protein	3	6	190	81	1.5544	93.1034	0.213158	0.0279581	1	0.387546	1	1	1	1	1
	group_16259		hypothetical protein	3	6	190	81	1.5544	93.1034	0.213158	0.0279581	1	0.387546	1	1	1	1	1
	group_16260	rtcB_2	RNA-splicing ligase RtcB	3	6	190	81	1.5544	93.1034	0.213158	0.0279581	1	0.387546	1	1	1	1	1
	group_16261		hypothetical protein	3	6	190	81	1.5544	93.1034	0.213158	0.0279581	1	0.387546	1	1	1	1	1
	group_16262		putative S-adenosylmethionine-dependent methyltransferase/MSMEI_2290	3	6	190	81	1.5544	93.1034	0.213158	0.0279581	1	0.387546	1	1	1	1	1
	oatA		O-acetyltransferase OatA	3	6	190	81	1.5544	93.1034	0.213158	0.0279581	1	0.387546	1	1	1	1	1
	group_16264		putative S-adenosylmethionine-dependent methyltransferase/MSMEI_2290	3	6	190	81	1.5544	93.1034	0.213158	0.0279581	1	0.387546	1	1	1	1	1
	group_16265		hypothetical protein	3	6	190	81	1.5544	93.1034	0.213158	0.0279581	1	0.387546	1	1	1	1	1
	aftB		Terminal beta-(1->2)-arabinofuranosyltransferase	3	6	190	81	1.5544	93.1034	0.213158	0.0279581	1	0.387546	1	1	1	1	1
	group_16267		hypothetical protein	3	6	190	81	1.5544	93.1034	0.213158	0.0279581	1	0.387546	1	1	1	1	1
	group_16268		putative oxidoreductase	3	6	190	81	1.5544	93.1034	0.213158	0.0279581	1	0.387546	1	1	1	1	1
	dprE1		Decaprenylphosphoryl-beta-D-ribose oxidase	3	6	190	81	1.5544	93.1034	0.213158	0.0279581	1	0.387546	1	1	1	1	1
	group_16270		hypothetical protein	3	6	190	81	1.5544	93.1034	0.213158	0.0279581	1	0.387546	1	1	1	1	1
	group_16271		Decaprenyl-phosphate phosphoribosyltransferase	3	6	190	81	1.5544	93.1034	0.213158	0.0279581	1	0.387546	1	1	1	1	1
	group_16272		hypothetical protein	3	6	190	81	1.5544	93.1034	0.213158	0.0279581	1	0.387546	1	1	1	1	1
	algA_3		Alginate biosynthesis protein AlgA	3	6	190	81	1.5544	93.1034	0.213158	0.0279581	1	0.387546	1	1	1	1	1
	group_16274	phnP	Phosphoribosyl 1,2-cyclic phosphate phosphodiesterase	3	6	190	81	1.5544	93.1034	0.213158	0.0279581	1	0.387546	1	1	1	1	1
	group_16275		hypothetical protein	3	6	190	81	1.5544	93.1034	0.213158	0.0279581	1	0.387546	1	1	1	1	1
	fecR_8		Protein FecR	3	6	190	81	1.5544	93.1034	0.213158	0.0279581	1	0.387546	1	1	1	1	1
	group_16277		hypothetical protein	3	6	190	81	1.5544	93.1034	0.213158	0.0279581	1	0.387546	1	1	1	1	1
	group_16278		hypothetical protein	3	6	190	81	1.5544	93.1034	0.213158	0.0279581	1	0.387546	1	1	1	1	1
	group_16279	pknK_2	Serine/threonine-protein kinase PknK	3	6	190	81	1.5544	93.1034	0.213158	0.0279581	1	0.387546	1	1	1	1	1
	group_16280		hypothetical protein	3	6	190	81	1.5544	93.1034	0.213158	0.0279581	1	0.387546	1	1	1	1	1
	group_16281	lip1	Lipase 1	3	6	190	81	1.5544	93.1034	0.213158	0.0279581	1	0.387546	1	1	1	1	1
	group_16282		hypothetical protein	3	6	190	81	1.5544	93.1034	0.213158	0.0279581	1	0.387546	1	1	1	1	1
	group_16283	barA_4	Signal transduction histidine-protein kinase BarA	3	6	190	81	1.5544	93.1034	0.213158	0.0279581	1	0.387546	1	1	1	1	1
	group_16285	yyaP	putative protein YyaP	3	6	190	81	1.5544	93.1034	0.213158	0.0279581	1	0.387546	1	1	1	1	1
	group_16286		hypothetical protein	3	6	190	81	1.5544	93.1034	0.213158	0.0279581	1	0.387546	1	1	1	1	1
	group_16287	pheC	Cyclohexadienyl dehydratase	3	6	190	81	1.5544	93.1034	0.213158	0.0279581	1	0.387546	1	1	1	1	1
	group_16288	anoI	Acyl-homoserine-lactone synthase	3	6	190	81	1.5544	93.1034	0.213158	0.0279581	1	0.387546	1	1	1	1	1
	group_16289	tylN	O-mycaminosyltylonolide 6-deoxyallosyltransferase	3	6	190	81	1.5544	93.1034	0.213158	0.0279581	1	0.387546	1	1	1	1	1
	group_16291	rsxB	Electron transport complex subunit RsxB	3	6	190	81	1.5544	93.1034	0.213158	0.0279581	1	0.387546	1	1	1	1	1
	group_16292	rsxD	Electron transport complex subunit RsxD	3	6	190	81	1.5544	93.1034	0.213158	0.0279581	1	0.387546	1	1	1	1	1
	rnfG		Electron transport complex subunit RnfG	3	6	190	81	1.5544	93.1034	0.213158	0.0279581	1	0.387546	1	1	1	1	1
	group_16294	rnfE	Electron transport complex subunit RnfE	3	6	190	81	1.5544	93.1034	0.213158	0.0279581	1	0.387546	1	1	1	1	1
	group_16295	pcaB_1	3-carboxy-cis,cis-muconate cycloisomerase	3	6	190	81	1.5544	93.1034	0.213158	0.0279581	1	0.387546	1	1	1	1	1
	group_16296		hypothetical protein	3	6	190	81	1.5544	93.1034	0.213158	0.0279581	1	0.387546	1	1	1	1	1
	group_16297	srpC_4	Solvent efflux pump outer membrane protein SrpC	3	6	190	81	1.5544	93.1034	0.213158	0.0279581	1	0.387546	1	1	1	1	1
	group_16298	bepE_3	Efflux pump membrane transporter BepE	3	6	190	81	1.5544	93.1034	0.213158	0.0279581	1	0.387546	1	1	1	1	1
	group_16299	bepF_3	Efflux pump periplasmic linker BepF	3	6	190	81	1.5544	93.1034	0.213158	0.0279581	1	0.387546	1	1	1	1	1
	group_16300	dnaE2	Error-prone DNA polymerase	3	6	190	81	1.5544	93.1034	0.213158	0.0279581	1	0.387546	1	1	1	1	1
	group_16301	imuB	Protein ImuB	3	6	190	81	1.5544	93.1034	0.213158	0.0279581	1	0.387546	1	1	1	1	1
	group_16302	sulA_1	Cell division inhibitor SulA	3	6	190	81	1.5544	93.1034	0.213158	0.0279581	1	0.387546	1	1	1	1	1
	group_16303	fpvA_2	Ferripyoverdine receptor	3	6	190	81	1.5544	93.1034	0.213158	0.0279581	1	0.387546	1	1	1	1	1
	group_16304		hypothetical protein	3	6	190	81	1.5544	93.1034	0.213158	0.0279581	1	0.387546	1	1	1	1	1
	group_16305	xcpW_2	Type II secretion system protein J	3	6	190	81	1.5544	93.1034	0.213158	0.0279581	1	0.387546	1	1	1	1	1
	gspH_2		hypothetical protein	3	6	190	81	1.5544	93.1034	0.213158	0.0279581	1	0.387546	1	1	1	1	1
	group_16307		hypothetical protein	3	6	190	81	1.5544	93.1034	0.213158	0.0279581	1	0.387546	1	1	1	1	1
	group_16308		hypothetical protein	3	6	190	81	1.5544	93.1034	0.213158	0.0279581	1	0.387546	1	1	1	1	1
	group_16309	hxuA_2	Heme/hemopexin-binding protein	3	6	190	81	1.5544	93.1034	0.213158	0.0279581	1	0.387546	1	1	1	1	1
	group_16310		hypothetical protein	3	6	190	81	1.5544	93.1034	0.213158	0.0279581	1	0.387546	1	1	1	1	1
	group_16311	prsA2	Foldase protein PrsA 2	3	6	190	81	1.5544	93.1034	0.213158	0.0279581	1	0.387546	1	1	1	1	1
	group_16312		hypothetical protein	3	6	190	81	1.5544	93.1034	0.213158	0.0279581	1	0.387546	1	1	1	1	1
	group_16313		hypothetical protein	3	6	190	81	1.5544	93.1034	0.213158	0.0279581	1	0.387546	1	1	1	1	1
	group_16314	rhaS_1	HTH-type transcriptional activator RhaS	3	6	190	81	1.5544	93.1034	0.213158	0.0279581	1	0.387546	1	1	1	1	1
	group_16315	proP_3	Proline/betaine transporter	3	6	190	81	1.5544	93.1034	0.213158	0.0279581	1	0.387546	1	1	1	1	1
	group_16316	aam_2	Acylamidase	3	6	190	81	1.5544	93.1034	0.213158	0.0279581	1	0.387546	1	1	1	1	1
	group_16320	rhlA_1	Rhamnosyltransferase 1 subunit A	3	6	190	81	1.5544	93.1034	0.213158	0.0279581	1	0.387546	1	1	1	1	1
	group_16321	rsuA	Ribosomal small subunit pseudouridine synthase A	3	6	190	81	1.5544	93.1034	0.213158	0.0279581	1	0.387546	1	1	1	1	1
	group_16322		hypothetical protein	3	6	190	81	1.5544	93.1034	0.213158	0.0279581	1	0.387546	1	1	1	1	1
	group_16323		hypothetical protein	3	6	190	81	1.5544	93.1034	0.213158	0.0279581	1	0.387546	1	1	1	1	1
	group_16324		hypothetical protein	3	6	190	81	1.5544	93.1034	0.213158	0.0279581	1	0.387546	1	1	1	1	1
	gbpR_2		HTH-type transcriptional regulator GbpR	3	6	190	81	1.5544	93.1034	0.213158	0.0279581	1	0.387546	1	1	1	1	1
	group_16326	ygfZ	tRNA-modifying protein YgfZ	3	6	190	81	1.5544	93.1034	0.213158	0.0279581	1	0.387546	1	1	1	1	1
	group_16327		hypothetical protein	3	6	190	81	1.5544	93.1034	0.213158	0.0279581	1	0.387546	1	1	1	1	1
	group_16328	rseC	Protein RseC	3	6	190	81	1.5544	93.1034	0.213158	0.0279581	1	0.387546	1	1	1	1	1
	group_16330		hypothetical protein	3	6	190	81	1.5544	93.1034	0.213158	0.0279581	1	0.387546	1	1	1	1	1
	group_16331		hypothetical protein	3	6	190	81	1.5544	93.1034	0.213158	0.0279581	1	0.387546	1	1	1	1	1
	group_16332	azoR1_1	FMN-dependent NADH-azoreductase 1	3	6	190	81	1.5544	93.1034	0.213158	0.0279581	1	0.387546	1	1	1	1	1
	group_16334	ubiE_1	Ubiquinone/menaquinone biosynthesis C-methyltransferase UbiE	3	6	190	81	1.5544	93.1034	0.213158	0.0279581	1	0.387546	1	1	1	1	1
	group_16335	yvgN	Glyoxal reductase	3	6	190	81	1.5544	93.1034	0.213158	0.0279581	1	0.387546	1	1	1	1	1
	group_16337		hypothetical protein	3	6	190	81	1.5544	93.1034	0.213158	0.0279581	1	0.387546	1	1	1	1	1
	group_16338	pncC_1	Nicotinamide-nucleotide amidohydrolase PncC	3	6	190	81	1.5544	93.1034	0.213158	0.0279581	1	0.387546	1	1	1	1	1
	group_16339	recX	Regulatory protein RecX	3	6	190	81	1.5544	93.1034	0.213158	0.0279581	1	0.387546	1	1	1	1	1
	group_16340		hypothetical protein	3	6	190	81	1.5544	93.1034	0.213158	0.0279581	1	0.387546	1	1	1	1	1
	group_16341	ada_1	Bifunctional transcriptional activator/DNA repair enzyme Ada	3	6	190	81	1.5544	93.1034	0.213158	0.0279581	1	0.387546	1	1	1	1	1
	group_16342	yhjE_2	Inner membrane metabolite transport protein YhjE	3	6	190	81	1.5544	93.1034	0.213158	0.0279581	1	0.387546	1	1	1	1	1
	yfdE_2		Acetyl-CoA:oxalate CoA-transferase	3	6	190	81	1.5544	93.1034	0.213158	0.0279581	1	0.387546	1	1	1	1	1
	group_16344	paaH_2	3-hydroxyadipyl-CoA dehydrogenase	3	6	190	81	1.5544	93.1034	0.213158	0.0279581	1	0.387546	1	1	1	1	1
	paaJ		3-oxoadipyl-CoA/3-oxo-5,6-dehydrosuberyl-CoA thiolase	3	6	190	81	1.5544	93.1034	0.213158	0.0279581	1	0.387546	1	1	1	1	1
	group_16346	metE	5-methyltetrahydropteroyltriglutamate--homocysteine methyltransferase	3	6	190	81	1.5544	93.1034	0.213158	0.0279581	1	0.387546	1	1	1	1	1
	group_16347		hypothetical protein	3	6	190	81	1.5544	93.1034	0.213158	0.0279581	1	0.387546	1	1	1	1	1
	group_16348	yodB_2	Cytochrome b561	3	6	190	81	1.5544	93.1034	0.213158	0.0279581	1	0.387546	1	1	1	1	1
	group_16350		hypothetical protein	3	6	190	81	1.5544	93.1034	0.213158	0.0279581	1	0.387546	1	1	1	1	1
	group_16353		hypothetical protein	3	6	190	81	1.5544	93.1034	0.213158	0.0279581	1	0.387546	1	1	1	1	1
	nrtA		Nitrate transport protein NrtA	3	6	190	81	1.5544	93.1034	0.213158	0.0279581	1	0.387546	1	1	1	1	1
	group_16355		hypothetical protein	3	6	190	81	1.5544	93.1034	0.213158	0.0279581	1	0.387546	1	1	1	1	1
	group_16356		hypothetical protein	3	6	190	81	1.5544	93.1034	0.213158	0.0279581	1	0.387546	1	1	1	1	1
	flp		Protein flp	3	6	190	81	1.5544	93.1034	0.213158	0.0279581	1	0.387546	1	1	1	1	1
	group_16358	rstB_1	Sensor protein RstB	3	6	190	81	1.5544	93.1034	0.213158	0.0279581	1	0.387546	1	1	1	1	1
	group_16359	rstA	Transcriptional regulatory protein RstA	3	6	190	81	1.5544	93.1034	0.213158	0.0279581	1	0.387546	1	1	1	1	1
	group_16382		hypothetical protein	3	6	190	81	1.5544	93.1034	0.213158	0.0279581	1	0.387546	1	1	1	1	1
	group_16384	pvdQ	Acyl-homoserine lactone acylase PvdQ	3	6	190	81	1.5544	93.1034	0.213158	0.0279581	1	0.387546	1	1	1	1	1
	fecR_4		Protein FecR	3	6	190	81	1.5544	93.1034	0.213158	0.0279581	1	0.387546	1	1	1	1	1
	group_16386		hypothetical protein	3	6	190	81	1.5544	93.1034	0.213158	0.0279581	1	0.387546	1	1	1	1	1
	group_16387		putative protein	3	6	190	81	1.5544	93.1034	0.213158	0.0279581	1	0.387546	1	1	1	1	1
	group_16388	kptA	RNA 2'-phosphotransferase	3	6	190	81	1.5544	93.1034	0.213158	0.0279581	1	0.387546	1	1	1	1	1
	group_16390		hypothetical protein	3	6	190	81	1.5544	93.1034	0.213158	0.0279581	1	0.387546	1	1	1	1	1
	group_16393		hypothetical protein	3	6	190	81	1.5544	93.1034	0.213158	0.0279581	1	0.387546	1	1	1	1	1
	group_16394		hypothetical protein	3	6	190	81	1.5544	93.1034	0.213158	0.0279581	1	0.387546	1	1	1	1	1
	dmlR_13		HTH-type transcriptional regulator DmlR	3	6	190	81	1.5544	93.1034	0.213158	0.0279581	1	0.387546	1	1	1	1	1
	group_16396	mdtA_2	Multidrug resistance protein MdtA	3	6	190	81	1.5544	93.1034	0.213158	0.0279581	1	0.387546	1	1	1	1	1
	group_16397		hypothetical protein	3	6	190	81	1.5544	93.1034	0.213158	0.0279581	1	0.387546	1	1	1	1	1
	group_16398	yigZ	IMPACT family member YigZ	3	6	190	81	1.5544	93.1034	0.213158	0.0279581	1	0.387546	1	1	1	1	1
	group_16399		putative protein	3	6	190	81	1.5544	93.1034	0.213158	0.0279581	1	0.387546	1	1	1	1	1
	cheA_3		Chemotaxis protein CheA	3	6	190	81	1.5544	93.1034	0.213158	0.0279581	1	0.387546	1	1	1	1	1
	group_16402	phoC	Major phosphate-irrepressible acid phosphatase	3	6	190	81	1.5544	93.1034	0.213158	0.0279581	1	0.387546	1	1	1	1	1
	group_16403	aam_3	Acylamidase	3	6	190	81	1.5544	93.1034	0.213158	0.0279581	1	0.387546	1	1	1	1	1
	group_16404	potB_2	Spermidine/putrescine transport system permease protein PotB	3	6	190	81	1.5544	93.1034	0.213158	0.0279581	1	0.387546	1	1	1	1	1
	group_16405	potA_4	Spermidine/putrescine import ATP-binding protein PotA	3	6	190	81	1.5544	93.1034	0.213158	0.0279581	1	0.387546	1	1	1	1	1
	group_16406	madD	Malonyl-S-ACP:biotin-protein carboxyltransferase MADD	3	6	190	81	1.5544	93.1034	0.213158	0.0279581	1	0.387546	1	1	1	1	1
	group_16407	fabD_1	Malonyl CoA-acyl carrier protein transacylase	3	6	190	81	1.5544	93.1034	0.213158	0.0279581	1	0.387546	1	1	1	1	1
	group_16408		hypothetical protein	3	6	190	81	1.5544	93.1034	0.213158	0.0279581	1	0.387546	1	1	1	1	1
	cynR_2		HTH-type transcriptional regulator CynR	3	6	190	81	1.5544	93.1034	0.213158	0.0279581	1	0.387546	1	1	1	1	1
	group_16410	exuT_2	Hexuronate transporter	3	6	190	81	1.5544	93.1034	0.213158	0.0279581	1	0.387546	1	1	1	1	1
	group_16411	nicS_2	HTH-type transcriptional repressor NicS	3	6	190	81	1.5544	93.1034	0.213158	0.0279581	1	0.387546	1	1	1	1	1
	group_16412	aroE_1	Quinate/shikimate dehydrogenase (NAD(+))	3	6	190	81	1.5544	93.1034	0.213158	0.0279581	1	0.387546	1	1	1	1	1
	aroQ_1		3-dehydroquinate dehydratase	3	6	190	81	1.5544	93.1034	0.213158	0.0279581	1	0.387546	1	1	1	1	1
	group_16414	pobA	p-hydroxybenzoate hydroxylase	3	6	190	81	1.5544	93.1034	0.213158	0.0279581	1	0.387546	1	1	1	1	1
	btr_7		HTH-type transcriptional activator Btr	3	6	190	81	1.5544	93.1034	0.213158	0.0279581	1	0.387546	1	1	1	1	1
	group_16416	yjaB_2	putative N-acetyltransferase YjaB	3	6	190	81	1.5544	93.1034	0.213158	0.0279581	1	0.387546	1	1	1	1	1
	group_16417		hypothetical protein	3	6	190	81	1.5544	93.1034	0.213158	0.0279581	1	0.387546	1	1	1	1	1
	group_16418	hudA	UbiD-like decarboxylase	3	6	190	81	1.5544	93.1034	0.213158	0.0279581	1	0.387546	1	1	1	1	1
	group_16419		hypothetical protein	3	6	190	81	1.5544	93.1034	0.213158	0.0279581	1	0.387546	1	1	1	1	1
	group_16420	cheY_1	Chemotaxis protein CheY	3	6	190	81	1.5544	93.1034	0.213158	0.0279581	1	0.387546	1	1	1	1	1
	group_16421	gabR_2	HTH-type transcriptional regulatory protein GabR	3	6	190	81	1.5544	93.1034	0.213158	0.0279581	1	0.387546	1	1	1	1	1
	group_16422		hypothetical protein	3	6	190	81	1.5544	93.1034	0.213158	0.0279581	1	0.387546	1	1	1	1	1
	group_16423		hypothetical protein	3	6	190	81	1.5544	93.1034	0.213158	0.0279581	1	0.387546	1	1	1	1	1
	group_16424	benM_3	Hca operon transcriptional activator HcaR	3	6	190	81	1.5544	93.1034	0.213158	0.0279581	1	0.387546	1	1	1	1	1
	group_16425	spuD_2	Putrescine-binding periplasmic protein SpuD	3	6	190	81	1.5544	93.1034	0.213158	0.0279581	1	0.387546	1	1	1	1	1
	group_16426	virS_2	putative HTH-type transcriptional regulator	3	6	190	81	1.5544	93.1034	0.213158	0.0279581	1	0.387546	1	1	1	1	1
	group_16427		hypothetical protein	3	6	190	81	1.5544	93.1034	0.213158	0.0279581	1	0.387546	1	1	1	1	1
	group_16428		hypothetical protein	3	6	190	81	1.5544	93.1034	0.213158	0.0279581	1	0.387546	1	1	1	1	1
	group_16430	dgcM_1	Diguanylate cyclase DgcM	3	6	190	81	1.5544	93.1034	0.213158	0.0279581	1	0.387546	1	1	1	1	1
	group_16431		hypothetical protein	3	6	190	81	1.5544	93.1034	0.213158	0.0279581	1	0.387546	1	1	1	1	1
	group_16432		hypothetical protein	3	6	190	81	1.5544	93.1034	0.213158	0.0279581	1	0.387546	1	1	1	1	1
	group_16433		hypothetical protein	3	6	190	81	1.5544	93.1034	0.213158	0.0279581	1	0.387546	1	1	1	1	1
	group_16434		hypothetical protein	3	6	190	81	1.5544	93.1034	0.213158	0.0279581	1	0.387546	1	1	1	1	1
	group_16435		hypothetical protein	3	6	190	81	1.5544	93.1034	0.213158	0.0279581	1	0.387546	1	1	1	1	1
	group_16436	rsmD	Ribosomal RNA small subunit methyltransferase D	3	6	190	81	1.5544	93.1034	0.213158	0.0279581	1	0.387546	1	1	1	1	1
	group_16439		hypothetical protein	3	6	190	81	1.5544	93.1034	0.213158	0.0279581	1	0.387546	1	1	1	1	1
	group_16440	spoT_1	Guanosine-3',5'-bis(diphosphate) 3'-pyrophosphohydrolase	3	6	190	81	1.5544	93.1034	0.213158	0.0279581	1	0.387546	1	1	1	1	1
	group_16441	creC	Sensor protein CreC	3	6	190	81	1.5544	93.1034	0.213158	0.0279581	1	0.387546	1	1	1	1	1
	group_16443	yibF_2	putative GST-like protein YibF	3	6	190	81	1.5544	93.1034	0.213158	0.0279581	1	0.387546	1	1	1	1	1
	vgb		Virginiamycin B lyase	3	6	190	81	1.5544	93.1034	0.213158	0.0279581	1	0.387546	1	1	1	1	1
	group_16445	yibF_1	putative GST-like protein YibF	3	6	190	81	1.5544	93.1034	0.213158	0.0279581	1	0.387546	1	1	1	1	1
	group_16446	yxaF_1	putative HTH-type transcriptional regulator YxaF	3	6	190	81	1.5544	93.1034	0.213158	0.0279581	1	0.387546	1	1	1	1	1
	group_16447		hypothetical protein	3	6	190	81	1.5544	93.1034	0.213158	0.0279581	1	0.387546	1	1	1	1	1
	group_16448	kipA	KipI antagonist	3	6	190	81	1.5544	93.1034	0.213158	0.0279581	1	0.387546	1	1	1	1	1
	group_16449	cysG_1	Siroheme synthase	3	6	190	81	1.5544	93.1034	0.213158	0.0279581	1	0.387546	1	1	1	1	1
	group_16450	yiiM_2	Protein YiiM	3	6	190	81	1.5544	93.1034	0.213158	0.0279581	1	0.387546	1	1	1	1	1
	group_16451		hypothetical protein	3	6	190	81	1.5544	93.1034	0.213158	0.0279581	1	0.387546	1	1	1	1	1
	group_16452	argD	Acetylornithine aminotransferase	3	6	190	81	1.5544	93.1034	0.213158	0.0279581	1	0.387546	1	1	1	1	1
	group_16453	guaA_4	GMP synthase [glutamine-hydrolyzing]	3	6	190	81	1.5544	93.1034	0.213158	0.0279581	1	0.387546	1	1	1	1	1
	group_16454	puuR_2	HTH-type transcriptional regulator PuuR	3	6	190	81	1.5544	93.1034	0.213158	0.0279581	1	0.387546	1	1	1	1	1
	yqjC_2		Protein YqjC	3	6	190	81	1.5544	93.1034	0.213158	0.0279581	1	0.387546	1	1	1	1	1
	group_16456		hypothetical protein	3	6	190	81	1.5544	93.1034	0.213158	0.0279581	1	0.387546	1	1	1	1	1
	group_16457	rclR_2	RCS-specific HTH-type transcriptional activator RclR	3	6	190	81	1.5544	93.1034	0.213158	0.0279581	1	0.387546	1	1	1	1	1
	group_16459		hypothetical protein	3	6	190	81	1.5544	93.1034	0.213158	0.0279581	1	0.387546	1	1	1	1	1
	folK_1		2-amino-4-hydroxy-6-hydroxymethyldihydropteridine pyrophosphokinase	3	6	190	81	1.5544	93.1034	0.213158	0.0279581	1	0.387546	1	1	1	1	1
	group_16461		hypothetical protein	3	6	190	81	1.5544	93.1034	0.213158	0.0279581	1	0.387546	1	1	1	1	1
	group_16462	apaH	Bis(5'-nucleosyl)-tetraphosphatase, symmetrical	3	6	190	81	1.5544	93.1034	0.213158	0.0279581	1	0.387546	1	1	1	1	1
	group_16463	pdxA	4-hydroxythreonine-4-phosphate dehydrogenase	3	6	190	81	1.5544	93.1034	0.213158	0.0279581	1	0.387546	1	1	1	1	1
	group_16464	murU	N-acetylmuramate alpha-1-phosphate uridylyltransferase	3	6	190	81	1.5544	93.1034	0.213158	0.0279581	1	0.387546	1	1	1	1	1
	group_16465	djlA	Co-chaperone protein DjlA	3	6	190	81	1.5544	93.1034	0.213158	0.0279581	1	0.387546	1	1	1	1	1
	potD_2		Spermidine/putrescine-binding periplasmic protein	3	6	190	81	1.5544	93.1034	0.213158	0.0279581	1	0.387546	1	1	1	1	1
	group_16488		hypothetical protein	3	6	190	81	1.5544	93.1034	0.213158	0.0279581	1	0.387546	1	1	1	1	1
	group_16489	ybiI_1	putative protein YbiI	3	6	190	81	1.5544	93.1034	0.213158	0.0279581	1	0.387546	1	1	1	1	1
	group_16490		hypothetical protein	3	6	190	81	1.5544	93.1034	0.213158	0.0279581	1	0.387546	1	1	1	1	1
	group_16491		hypothetical protein	3	6	190	81	1.5544	93.1034	0.213158	0.0279581	1	0.387546	1	1	1	1	1
	group_16496		hypothetical protein	3	6	190	81	1.5544	93.1034	0.213158	0.0279581	1	0.387546	1	1	1	1	1
	group_16497		hypothetical protein	3	6	190	81	1.5544	93.1034	0.213158	0.0279581	1	0.387546	1	1	1	1	1
	group_16498		hypothetical protein	3	6	190	81	1.5544	93.1034	0.213158	0.0279581	1	0.387546	1	1	1	1	1
	group_16499		hypothetical protein	3	6	190	81	1.5544	93.1034	0.213158	0.0279581	1	0.387546	1	1	1	1	1
	group_16500		hypothetical protein	3	6	190	81	1.5544	93.1034	0.213158	0.0279581	1	0.387546	1	1	1	1	1
	group_16501		hypothetical protein	3	6	190	81	1.5544	93.1034	0.213158	0.0279581	1	0.387546	1	1	1	1	1
	group_16502		hypothetical protein	3	6	190	81	1.5544	93.1034	0.213158	0.0279581	1	0.387546	1	1	1	1	1
	group_16508	ftsH_1	ATP-dependent zinc metalloprotease FtsH	3	6	190	81	1.5544	93.1034	0.213158	0.0279581	1	0.387546	1	1	1	1	1
	ephD_4		putative oxidoreductase EphD	3	6	190	81	1.5544	93.1034	0.213158	0.0279581	1	0.387546	1	1	1	1	1
	group_16510	yhaI_1	Inner membrane protein YhaI	3	6	190	81	1.5544	93.1034	0.213158	0.0279581	1	0.387546	1	1	1	1	1
	group_16511		Nitronate monooxygenase	3	6	190	81	1.5544	93.1034	0.213158	0.0279581	1	0.387546	1	1	1	1	1
	group_16512		hypothetical protein	3	6	190	81	1.5544	93.1034	0.213158	0.0279581	1	0.387546	1	1	1	1	1
	group_16513	mepM_3	Murein DD-endopeptidase MepM	3	6	190	81	1.5544	93.1034	0.213158	0.0279581	1	0.387546	1	1	1	1	1
	norG_5		HTH-type transcriptional regulator NorG	3	6	190	81	1.5544	93.1034	0.213158	0.0279581	1	0.387546	1	1	1	1	1
	group_16526		hypothetical protein	3	6	190	81	1.5544	93.1034	0.213158	0.0279581	1	0.387546	1	1	1	1	1
	group_16527	cyaY	Iron-sulfur cluster assembly protein CyaY	3	6	190	81	1.5544	93.1034	0.213158	0.0279581	1	0.387546	1	1	1	1	1
	group_16528	cyaA	Adenylate cyclase	3	6	190	81	1.5544	93.1034	0.213158	0.0279581	1	0.387546	1	1	1	1	1
	group_16529		hypothetical protein	3	6	190	81	1.5544	93.1034	0.213158	0.0279581	1	0.387546	1	1	1	1	1
	group_16530	hemX	Protein HemX	3	6	190	81	1.5544	93.1034	0.213158	0.0279581	1	0.387546	1	1	1	1	1
	group_16531	dsbB_2	Disulfide bond formation protein B	3	6	190	81	1.5544	93.1034	0.213158	0.0279581	1	0.387546	1	1	1	1	1
	group_16532	mip	Outer membrane protein MIP	3	6	190	81	1.5544	93.1034	0.213158	0.0279581	1	0.387546	1	1	1	1	1
	group_16533		hypothetical protein	3	6	190	81	1.5544	93.1034	0.213158	0.0279581	1	0.387546	1	1	1	1	1
	group_16534		Putative esterase	3	6	190	81	1.5544	93.1034	0.213158	0.0279581	1	0.387546	1	1	1	1	1
	group_16535	elbB	Glyoxalase ElbB	3	6	190	81	1.5544	93.1034	0.213158	0.0279581	1	0.387546	1	1	1	1	1
	group_16536		hypothetical protein	3	6	190	81	1.5544	93.1034	0.213158	0.0279581	1	0.387546	1	1	1	1	1
	group_16548	yfcF	Glutathione S-transferase YfcF	3	6	190	81	1.5544	93.1034	0.213158	0.0279581	1	0.387546	1	1	1	1	1
	group_16549	panE	2-dehydropantoate 2-reductase	3	6	190	81	1.5544	93.1034	0.213158	0.0279581	1	0.387546	1	1	1	1	1
	group_16550		DNA base-flipping protein	3	6	190	81	1.5544	93.1034	0.213158	0.0279581	1	0.387546	1	1	1	1	1
	group_16551		hypothetical protein	3	6	190	81	1.5544	93.1034	0.213158	0.0279581	1	0.387546	1	1	1	1	1
	group_16554		hypothetical protein	3	6	190	81	1.5544	93.1034	0.213158	0.0279581	1	0.387546	1	1	1	1	1
	group_16555	argO	Arginine exporter protein ArgO	3	6	190	81	1.5544	93.1034	0.213158	0.0279581	1	0.387546	1	1	1	1	1
	group_16556		Putative trans-acting enoyl reductase	3	6	190	81	1.5544	93.1034	0.213158	0.0279581	1	0.387546	1	1	1	1	1
	group_16557	oleD	2-alkyl-3-oxoalkanoate reductase	3	6	190	81	1.5544	93.1034	0.213158	0.0279581	1	0.387546	1	1	1	1	1
	group_16558		hypothetical protein	3	6	190	81	1.5544	93.1034	0.213158	0.0279581	1	0.387546	1	1	1	1	1
	group_16559	nylB	6-aminohexanoate-dimer hydrolase	3	6	190	81	1.5544	93.1034	0.213158	0.0279581	1	0.387546	1	1	1	1	1
	group_16560		hypothetical protein	3	6	190	81	1.5544	93.1034	0.213158	0.0279581	1	0.387546	1	1	1	1	1
	hipO		Hippurate hydrolase	3	6	190	81	1.5544	93.1034	0.213158	0.0279581	1	0.387546	1	1	1	1	1
	aam_3		Acylamidase	3	6	190	81	1.5544	93.1034	0.213158	0.0279581	1	0.387546	1	1	1	1	1
	group_16563		hypothetical protein	3	6	190	81	1.5544	93.1034	0.213158	0.0279581	1	0.387546	1	1	1	1	1
	group_16564		hypothetical protein	3	6	190	81	1.5544	93.1034	0.213158	0.0279581	1	0.387546	1	1	1	1	1
	group_16565		hypothetical protein	3	6	190	81	1.5544	93.1034	0.213158	0.0279581	1	0.387546	1	1	1	1	1
	group_16566	ndoR	Naphthalene 1,2-dioxygenase system ferredoxin--NAD(P)(+), reductase component	3	6	190	81	1.5544	93.1034	0.213158	0.0279581	1	0.387546	1	1	1	1	1
	uspE_3		Universal stress protein E	3	6	190	81	1.5544	93.1034	0.213158	0.0279581	1	0.387546	1	1	1	1	1
	group_16568		hypothetical protein	3	6	190	81	1.5544	93.1034	0.213158	0.0279581	1	0.387546	1	1	1	1	1
	group_16569		hypothetical protein	3	6	190	81	1.5544	93.1034	0.213158	0.0279581	1	0.387546	1	1	1	1	1
	group_16570		hypothetical protein	3	6	190	81	1.5544	93.1034	0.213158	0.0279581	1	0.387546	1	1	1	1	1
	group_16571		hypothetical protein	3	6	190	81	1.5544	93.1034	0.213158	0.0279581	1	0.387546	1	1	1	1	1
	group_16572	sbcB	Exodeoxyribonuclease I	3	6	190	81	1.5544	93.1034	0.213158	0.0279581	1	0.387546	1	1	1	1	1
	group_16573		hypothetical protein	3	6	190	81	1.5544	93.1034	0.213158	0.0279581	1	0.387546	1	1	1	1	1
	group_16574		hypothetical protein	3	6	190	81	1.5544	93.1034	0.213158	0.0279581	1	0.387546	1	1	1	1	1
	group_16575		hypothetical protein	3	6	190	81	1.5544	93.1034	0.213158	0.0279581	1	0.387546	1	1	1	1	1
	group_16576	mltB_2	Membrane-bound lytic murein transglycosylase B	3	6	190	81	1.5544	93.1034	0.213158	0.0279581	1	0.387546	1	1	1	1	1
	group_16577	hisC_2	Histidinol-phosphate aminotransferase	3	6	190	81	1.5544	93.1034	0.213158	0.0279581	1	0.387546	1	1	1	1	1
	group_16578		hypothetical protein	3	6	190	81	1.5544	93.1034	0.213158	0.0279581	1	0.387546	1	1	1	1	1
	group_16579	sodB_1	Superoxide dismutase [Mn/Fe]	3	6	190	81	1.5544	93.1034	0.213158	0.0279581	1	0.387546	1	1	1	1	1
	group_16580		hypothetical protein	3	6	190	81	1.5544	93.1034	0.213158	0.0279581	1	0.387546	1	1	1	1	1
	group_16581		hypothetical protein	3	6	190	81	1.5544	93.1034	0.213158	0.0279581	1	0.387546	1	1	1	1	1
	group_16582	yhdE	Maf-like protein YhdE	3	6	190	81	1.5544	93.1034	0.213158	0.0279581	1	0.387546	1	1	1	1	1
	group_16583	ybgK_2	putative protein YbgK	3	6	190	81	1.5544	93.1034	0.213158	0.0279581	1	0.387546	1	1	1	1	1
	group_16584	kipI_3	Kinase A inhibitor	3	6	190	81	1.5544	93.1034	0.213158	0.0279581	1	0.387546	1	1	1	1	1
	group_16585		hypothetical protein	3	6	190	81	1.5544	93.1034	0.213158	0.0279581	1	0.387546	1	1	1	1	1
	group_16586		hypothetical protein	3	6	190	81	1.5544	93.1034	0.213158	0.0279581	1	0.387546	1	1	1	1	1
	group_16587	esiB_3	Secretory immunoglobulin A-binding protein EsiB	3	6	190	81	1.5544	93.1034	0.213158	0.0279581	1	0.387546	1	1	1	1	1
	group_16588	ampD	1,6-anhydro-N-acetylmuramyl-L-alanine amidase AmpD	3	6	190	81	1.5544	93.1034	0.213158	0.0279581	1	0.387546	1	1	1	1	1
	group_16589		hypothetical protein	3	6	190	81	1.5544	93.1034	0.213158	0.0279581	1	0.387546	1	1	1	1	1
	group_16609	ble	Bleomycin resistance protein	3	6	190	81	1.5544	93.1034	0.213158	0.0279581	1	0.387546	1	1	1	1	1
	group_16610		hypothetical protein	3	6	190	81	1.5544	93.1034	0.213158	0.0279581	1	0.387546	1	1	1	1	1
	group_16611	dauA_1	FAD-dependent catabolic D-arginine dehydrogenase DauA	3	6	190	81	1.5544	93.1034	0.213158	0.0279581	1	0.387546	1	1	1	1	1
	group_16612	yabJ_1	2-iminobutanoate/2-iminopropanoate deaminase	3	6	190	81	1.5544	93.1034	0.213158	0.0279581	1	0.387546	1	1	1	1	1
	group_16613		hypothetical protein	3	6	190	81	1.5544	93.1034	0.213158	0.0279581	1	0.387546	1	1	1	1	1
	group_16614	usg	USG-1 protein	3	6	190	81	1.5544	93.1034	0.213158	0.0279581	1	0.387546	1	1	1	1	1
	group_16615	trpF	N-(5'-phosphoribosyl)anthranilate isomerase	3	6	190	81	1.5544	93.1034	0.213158	0.0279581	1	0.387546	1	1	1	1	1
	group_16616	ftsN_1	Cell division protein FtsN	3	6	190	81	1.5544	93.1034	0.213158	0.0279581	1	0.387546	1	1	1	1	1
	group_16617	fabG_8	3-oxoacyl-[acyl-carrier-protein] reductase FabG	3	6	190	81	1.5544	93.1034	0.213158	0.0279581	1	0.387546	1	1	1	1	1
	group_16618	mltB_3	Membrane-bound lytic murein transglycosylase B	3	6	190	81	1.5544	93.1034	0.213158	0.0279581	1	0.387546	1	1	1	1	1
	group_16619		hypothetical protein	3	6	190	81	1.5544	93.1034	0.213158	0.0279581	1	0.387546	1	1	1	1	1
	group_16620		hypothetical protein	3	6	190	81	1.5544	93.1034	0.213158	0.0279581	1	0.387546	1	1	1	1	1
	group_16621		hypothetical protein	3	6	190	81	1.5544	93.1034	0.213158	0.0279581	1	0.387546	1	1	1	1	1
	group_16622		putative protein	3	6	190	81	1.5544	93.1034	0.213158	0.0279581	1	0.387546	1	1	1	1	1
	group_16623		hypothetical protein	3	6	190	81	1.5544	93.1034	0.213158	0.0279581	1	0.387546	1	1	1	1	1
	group_16624		hypothetical protein	3	6	190	81	1.5544	93.1034	0.213158	0.0279581	1	0.387546	1	1	1	1	1
	group_16625		hypothetical protein	3	6	190	81	1.5544	93.1034	0.213158	0.0279581	1	0.387546	1	1	1	1	1
	group_16627		hypothetical protein	3	6	190	81	1.5544	93.1034	0.213158	0.0279581	1	0.387546	1	1	1	1	1
	group_16628		hypothetical protein	3	6	190	81	1.5544	93.1034	0.213158	0.0279581	1	0.387546	1	1	1	1	1
	group_16630	trpI_2	HTH-type transcriptional regulator TrpI	3	6	190	81	1.5544	93.1034	0.213158	0.0279581	1	0.387546	1	1	1	1	1
	group_16631	trpA	Tryptophan synthase alpha chain	3	6	190	81	1.5544	93.1034	0.213158	0.0279581	1	0.387546	1	1	1	1	1
	group_16632		hypothetical protein	3	6	190	81	1.5544	93.1034	0.213158	0.0279581	1	0.387546	1	1	1	1	1
	group_16633		hypothetical protein	3	6	190	81	1.5544	93.1034	0.213158	0.0279581	1	0.387546	1	1	1	1	1
	gcvA_10		Glycine cleavage system transcriptional activator	3	6	190	81	1.5544	93.1034	0.213158	0.0279581	1	0.387546	1	1	1	1	1
	group_16635	betC	Choline-sulfatase	3	6	190	81	1.5544	93.1034	0.213158	0.0279581	1	0.387546	1	1	1	1	1
	group_16636	opuAC	Glycine betaine-binding protein OpuAC	3	6	190	81	1.5544	93.1034	0.213158	0.0279581	1	0.387546	1	1	1	1	1
	group_16637	dauA_2	C4-dicarboxylic acid transporter DauA	3	6	190	81	1.5544	93.1034	0.213158	0.0279581	1	0.387546	1	1	1	1	1
	group_16638	prsA	Foldase protein PrsA	3	6	190	81	1.5544	93.1034	0.213158	0.0279581	1	0.387546	1	1	1	1	1
	group_16639	aroE_2	Shikimate dehydrogenase (NADP(+))	3	6	190	81	1.5544	93.1034	0.213158	0.0279581	1	0.387546	1	1	1	1	1
	group_16640	qorA_3	Quinone oxidoreductase 1	3	6	190	81	1.5544	93.1034	0.213158	0.0279581	1	0.387546	1	1	1	1	1
	group_16641	dprA	DNA processing protein DprA	3	6	190	81	1.5544	93.1034	0.213158	0.0279581	1	0.387546	1	1	1	1	1
	group_16642	fmt	Methionyl-tRNA formyltransferase	3	6	190	81	1.5544	93.1034	0.213158	0.0279581	1	0.387546	1	1	1	1	1
	group_16643	rsmB	Ribosomal RNA small subunit methyltransferase B	3	6	190	81	1.5544	93.1034	0.213158	0.0279581	1	0.387546	1	1	1	1	1
	group_16644		hypothetical protein	3	6	190	81	1.5544	93.1034	0.213158	0.0279581	1	0.387546	1	1	1	1	1
	group_16645		hypothetical protein	3	6	190	81	1.5544	93.1034	0.213158	0.0279581	1	0.387546	1	1	1	1	1
	group_16646		hypothetical protein	3	6	190	81	1.5544	93.1034	0.213158	0.0279581	1	0.387546	1	1	1	1	1
	group_16647	nylB'_2	6-aminohexanoate-dimer hydrolase	3	6	190	81	1.5544	93.1034	0.213158	0.0279581	1	0.387546	1	1	1	1	1
	group_16648	pyrC_2	Dihydroorotase	3	6	190	81	1.5544	93.1034	0.213158	0.0279581	1	0.387546	1	1	1	1	1
	group_16649	folE2	hypothetical protein	3	6	190	81	1.5544	93.1034	0.213158	0.0279581	1	0.387546	1	1	1	1	1
	group_16650	amiC_4	N-acetylmuramoyl-L-alanine amidase AmiC	3	6	190	81	1.5544	93.1034	0.213158	0.0279581	1	0.387546	1	1	1	1	1
	group_16651		hypothetical protein	3	6	190	81	1.5544	93.1034	0.213158	0.0279581	1	0.387546	1	1	1	1	1
	group_16652		hypothetical protein	3	6	190	81	1.5544	93.1034	0.213158	0.0279581	1	0.387546	1	1	1	1	1
	group_16653	yeiR	Zinc-binding GTPase YeiR	3	6	190	81	1.5544	93.1034	0.213158	0.0279581	1	0.387546	1	1	1	1	1
	group_16655	ubiC	Chorismate pyruvate-lyase	3	6	190	81	1.5544	93.1034	0.213158	0.0279581	1	0.387546	1	1	1	1	1
	group_16656	lutA	Lactate utilization protein A	3	6	190	81	1.5544	93.1034	0.213158	0.0279581	1	0.387546	1	1	1	1	1
	group_16657		hypothetical protein	3	6	190	81	1.5544	93.1034	0.213158	0.0279581	1	0.387546	1	1	1	1	1
	group_16658		hypothetical protein	3	6	190	81	1.5544	93.1034	0.213158	0.0279581	1	0.387546	1	1	1	1	1
	group_16659	ybgC_2	Acyl-CoA thioester hydrolase YbgC	3	6	190	81	1.5544	93.1034	0.213158	0.0279581	1	0.387546	1	1	1	1	1
	group_16660		L-gulono-1,4-lactone dehydrogenase	3	6	190	81	1.5544	93.1034	0.213158	0.0279581	1	0.387546	1	1	1	1	1
	group_16661		putative signaling protein	3	6	190	81	1.5544	93.1034	0.213158	0.0279581	1	0.387546	1	1	1	1	1
	group_16662	mdtK_2	Multidrug resistance protein MdtK	3	6	190	81	1.5544	93.1034	0.213158	0.0279581	1	0.387546	1	1	1	1	1
	group_16691		hypothetical protein	3	6	190	81	1.5544	93.1034	0.213158	0.0279581	1	0.387546	1	1	1	1	1
	group_16692	fecI_7	putative RNA polymerase sigma factor FecI	3	6	190	81	1.5544	93.1034	0.213158	0.0279581	1	0.387546	1	1	1	1	1
	group_16693		hypothetical protein	3	6	190	81	1.5544	93.1034	0.213158	0.0279581	1	0.387546	1	1	1	1	1
	group_16694		hypothetical protein	3	6	190	81	1.5544	93.1034	0.213158	0.0279581	1	0.387546	1	1	1	1	1
	group_16695		putative methyltransferase	3	6	190	81	1.5544	93.1034	0.213158	0.0279581	1	0.387546	1	1	1	1	1
	dauA_1		FAD-dependent catabolic D-arginine dehydrogenase DauA	3	6	190	81	1.5544	93.1034	0.213158	0.0279581	1	0.387546	1	1	1	1	1
	group_16697	estB_1	Carboxylesterase 2	3	6	190	81	1.5544	93.1034	0.213158	0.0279581	1	0.387546	1	1	1	1	1
	group_16699	mdtA_2	Multidrug resistance protein MdtA	3	6	190	81	1.5544	93.1034	0.213158	0.0279581	1	0.387546	1	1	1	1	1
	group_16700	czcS_1	Sensor protein CzcS	3	6	190	81	1.5544	93.1034	0.213158	0.0279581	1	0.387546	1	1	1	1	1
	group_16701	fliK	Flagellar hook-length control protein	3	6	190	81	1.5544	93.1034	0.213158	0.0279581	1	0.387546	1	1	1	1	1
	group_16704	fliO	Flagellar protein FliO	3	6	190	81	1.5544	93.1034	0.213158	0.0279581	1	0.387546	1	1	1	1	1
	group_16705		hypothetical protein	3	6	190	81	1.5544	93.1034	0.213158	0.0279581	1	0.387546	1	1	1	1	1
	group_16706		hypothetical protein	3	6	190	81	1.5544	93.1034	0.213158	0.0279581	1	0.387546	1	1	1	1	1
	group_16707	cheB1	Chemotaxis response regulator protein-glutamate methylesterase of group 1 operon	3	6	190	81	1.5544	93.1034	0.213158	0.0279581	1	0.387546	1	1	1	1	1
	group_16708		hypothetical protein	3	6	190	81	1.5544	93.1034	0.213158	0.0279581	1	0.387546	1	1	1	1	1
	group_16709	gstB_1	Glutathione S-transferase GST-6.0	3	6	190	81	1.5544	93.1034	0.213158	0.0279581	1	0.387546	1	1	1	1	1
	group_16710		hypothetical protein	3	6	190	81	1.5544	93.1034	0.213158	0.0279581	1	0.387546	1	1	1	1	1
	group_16711	flhB_1	Flagellar biosynthetic protein FlhB	3	6	190	81	1.5544	93.1034	0.213158	0.0279581	1	0.387546	1	1	1	1	1
	group_16712		Urea transporter	3	6	190	81	1.5544	93.1034	0.213158	0.0279581	1	0.387546	1	1	1	1	1
	group_16713	alc	allantoicase	3	6	190	81	1.5544	93.1034	0.213158	0.0279581	1	0.387546	1	1	1	1	1
	group_16714		hypothetical protein	3	6	190	81	1.5544	93.1034	0.213158	0.0279581	1	0.387546	1	1	1	1	1
	group_16715	norR2	Nitric oxide reductase transcription regulator NorR2	3	6	190	81	1.5544	93.1034	0.213158	0.0279581	1	0.387546	1	1	1	1	1
	group_16716		hypothetical protein	3	6	190	81	1.5544	93.1034	0.213158	0.0279581	1	0.387546	1	1	1	1	1
	group_16717		hypothetical protein	3	6	190	81	1.5544	93.1034	0.213158	0.0279581	1	0.387546	1	1	1	1	1
	group_16718		hypothetical protein	3	6	190	81	1.5544	93.1034	0.213158	0.0279581	1	0.387546	1	1	1	1	1
	group_16719		hypothetical protein	3	6	190	81	1.5544	93.1034	0.213158	0.0279581	1	0.387546	1	1	1	1	1
	group_16720		hypothetical protein	3	6	190	81	1.5544	93.1034	0.213158	0.0279581	1	0.387546	1	1	1	1	1
	oprO_2		Porin O	3	6	190	81	1.5544	93.1034	0.213158	0.0279581	1	0.387546	1	1	1	1	1
	group_16722	algB_1	Alginate biosynthesis transcriptional regulatory protein AlgB	3	6	190	81	1.5544	93.1034	0.213158	0.0279581	1	0.387546	1	1	1	1	1
	zraS_2		Sensor protein ZraS	3	6	190	81	1.5544	93.1034	0.213158	0.0279581	1	0.387546	1	1	1	1	1
	group_16724		hypothetical protein	3	6	190	81	1.5544	93.1034	0.213158	0.0279581	1	0.387546	1	1	1	1	1
	group_16725		hypothetical protein	3	6	190	81	1.5544	93.1034	0.213158	0.0279581	1	0.387546	1	1	1	1	1
	group_16726	aat	Leucyl/phenylalanyl-tRNA--protein transferase	3	6	190	81	1.5544	93.1034	0.213158	0.0279581	1	0.387546	1	1	1	1	1
	group_16727	tusE	Sulfurtransferase TusE	3	6	190	81	1.5544	93.1034	0.213158	0.0279581	1	0.387546	1	1	1	1	1
	group_16728		hypothetical protein	3	6	190	81	1.5544	93.1034	0.213158	0.0279581	1	0.387546	1	1	1	1	1
	spuD_4		Putrescine-binding periplasmic protein SpuD	3	6	190	81	1.5544	93.1034	0.213158	0.0279581	1	0.387546	1	1	1	1	1
	group_16730	nreC_2	Oxygen regulatory protein NreC	3	6	190	81	1.5544	93.1034	0.213158	0.0279581	1	0.387546	1	1	1	1	1
	group_16731		putative HTH-type transcriptional regulator	3	6	190	81	1.5544	93.1034	0.213158	0.0279581	1	0.387546	1	1	1	1	1
	group_16732	pqsH	2-heptyl-3-hydroxy-4(1H)-quinolone synthase	3	6	190	81	1.5544	93.1034	0.213158	0.0279581	1	0.387546	1	1	1	1	1
	group_16751	pdeB_1	putative cyclic di-GMP phosphodiesterase PdeB	3	6	190	81	1.5544	93.1034	0.213158	0.0279581	1	0.387546	1	1	1	1	1
	group_16752	dmlR_4	HTH-type transcriptional regulator DmlR	3	6	190	81	1.5544	93.1034	0.213158	0.0279581	1	0.387546	1	1	1	1	1
	group_16753		hypothetical protein	3	6	190	81	1.5544	93.1034	0.213158	0.0279581	1	0.387546	1	1	1	1	1
	group_16755	pkn1_1	Serine/threonine-protein kinase pkn1	3	6	190	81	1.5544	93.1034	0.213158	0.0279581	1	0.387546	1	1	1	1	1
	atsA_1		Arylsulfatase	3	6	190	81	1.5544	93.1034	0.213158	0.0279581	1	0.387546	1	1	1	1	1
	group_16757		hypothetical protein	3	6	190	81	1.5544	93.1034	0.213158	0.0279581	1	0.387546	1	1	1	1	1
	group_16758		putative protein	3	6	190	81	1.5544	93.1034	0.213158	0.0279581	1	0.387546	1	1	1	1	1
	group_16759		hypothetical protein	3	6	190	81	1.5544	93.1034	0.213158	0.0279581	1	0.387546	1	1	1	1	1
	group_16760	bglA	Beta-glucosidase A	3	6	190	81	1.5544	93.1034	0.213158	0.0279581	1	0.387546	1	1	1	1	1
	nicS_3		HTH-type transcriptional repressor NicS	3	6	190	81	1.5544	93.1034	0.213158	0.0279581	1	0.387546	1	1	1	1	1
	group_16762		hypothetical protein	3	6	190	81	1.5544	93.1034	0.213158	0.0279581	1	0.387546	1	1	1	1	1
	group_16764	mdaB	Modulator of drug activity B	3	6	190	81	1.5544	93.1034	0.213158	0.0279581	1	0.387546	1	1	1	1	1
	group_16765		hypothetical protein	3	6	190	81	1.5544	93.1034	0.213158	0.0279581	1	0.387546	1	1	1	1	1
	group_16766	alkB1	Alkane 1-monooxygenase 1	3	6	190	81	1.5544	93.1034	0.213158	0.0279581	1	0.387546	1	1	1	1	1
	zraS_3		Sensor protein ZraS	3	6	190	81	1.5544	93.1034	0.213158	0.0279581	1	0.387546	1	1	1	1	1
	group_16768		hypothetical protein	3	6	190	81	1.5544	93.1034	0.213158	0.0279581	1	0.387546	1	1	1	1	1
	group_16769		hypothetical protein	3	6	190	81	1.5544	93.1034	0.213158	0.0279581	1	0.387546	1	1	1	1	1
	group_16770		hypothetical protein	3	6	190	81	1.5544	93.1034	0.213158	0.0279581	1	0.387546	1	1	1	1	1
	group_16771		hypothetical protein	3	6	190	81	1.5544	93.1034	0.213158	0.0279581	1	0.387546	1	1	1	1	1
	group_16772		putative signaling protein	3	6	190	81	1.5544	93.1034	0.213158	0.0279581	1	0.387546	1	1	1	1	1
	group_16773		hypothetical protein	3	6	190	81	1.5544	93.1034	0.213158	0.0279581	1	0.387546	1	1	1	1	1
	group_16774		hypothetical protein	3	6	190	81	1.5544	93.1034	0.213158	0.0279581	1	0.387546	1	1	1	1	1
	group_16775	tam_2	Trans-aconitate 2-methyltransferase	3	6	190	81	1.5544	93.1034	0.213158	0.0279581	1	0.387546	1	1	1	1	1
	group_16776	bicA_2	Bicarbonate transporter BicA	3	6	190	81	1.5544	93.1034	0.213158	0.0279581	1	0.387546	1	1	1	1	1
	group_16777		hypothetical protein	3	6	190	81	1.5544	93.1034	0.213158	0.0279581	1	0.387546	1	1	1	1	1
	group_16778		hypothetical protein	3	6	190	81	1.5544	93.1034	0.213158	0.0279581	1	0.387546	1	1	1	1	1
	group_16779		hypothetical protein	3	6	190	81	1.5544	93.1034	0.213158	0.0279581	1	0.387546	1	1	1	1	1
	ureR		Urease operon transcriptional activator	3	6	190	81	1.5544	93.1034	0.213158	0.0279581	1	0.387546	1	1	1	1	1
	group_16781	pstS_2	Phosphate-binding protein PstS	3	6	190	81	1.5544	93.1034	0.213158	0.0279581	1	0.387546	1	1	1	1	1
	group_16783		hypothetical protein	3	6	190	81	1.5544	93.1034	0.213158	0.0279581	1	0.387546	1	1	1	1	1
	pat_2		Putative phenylalanine aminotransferase	3	6	190	81	1.5544	93.1034	0.213158	0.0279581	1	0.387546	1	1	1	1	1
	group_16785		hypothetical protein	3	6	190	81	1.5544	93.1034	0.213158	0.0279581	1	0.387546	1	1	1	1	1
	group_16786	tldD_1	Metalloprotease TldD	3	6	190	81	1.5544	93.1034	0.213158	0.0279581	1	0.387546	1	1	1	1	1
	group_16787	rhaS_3	HTH-type transcriptional activator RhaS	3	6	190	81	1.5544	93.1034	0.213158	0.0279581	1	0.387546	1	1	1	1	1
	group_16788	antC	Anthranilate 1,2-dioxygenase electron transfer component	3	6	190	81	1.5544	93.1034	0.213158	0.0279581	1	0.387546	1	1	1	1	1
	group_16789	catC	Muconolactone Delta-isomerase	3	6	190	81	1.5544	93.1034	0.213158	0.0279581	1	0.387546	1	1	1	1	1
	group_16790		hypothetical protein	3	6	190	81	1.5544	93.1034	0.213158	0.0279581	1	0.387546	1	1	1	1	1
	group_16791	oprD_8	Porin D	3	6	190	81	1.5544	93.1034	0.213158	0.0279581	1	0.387546	1	1	1	1	1
	group_16792		hypothetical protein	3	6	190	81	1.5544	93.1034	0.213158	0.0279581	1	0.387546	1	1	1	1	1
	group_16794	yycB_2	putative transporter YycB	3	6	190	81	1.5544	93.1034	0.213158	0.0279581	1	0.387546	1	1	1	1	1
	group_16795	guaD_1	Guanine deaminase	3	6	190	81	1.5544	93.1034	0.213158	0.0279581	1	0.387546	1	1	1	1	1
	group_16796		hypothetical protein	3	6	190	81	1.5544	93.1034	0.213158	0.0279581	1	0.387546	1	1	1	1	1
	group_16797	gltC_1	HTH-type transcriptional regulator GltC	3	6	190	81	1.5544	93.1034	0.213158	0.0279581	1	0.387546	1	1	1	1	1
	nimR_11		HTH-type transcriptional regulator NimR	3	6	190	81	1.5544	93.1034	0.213158	0.0279581	1	0.387546	1	1	1	1	1
	bioI		Biotin biosynthesis cytochrome P450	3	6	190	81	1.5544	93.1034	0.213158	0.0279581	1	0.387546	1	1	1	1	1
	group_16800	nagL_1	Maleylpyruvate isomerase	3	6	190	81	1.5544	93.1034	0.213158	0.0279581	1	0.387546	1	1	1	1	1
	group_16801	pcaK_1	4-hydroxybenzoate transporter PcaK	3	6	190	81	1.5544	93.1034	0.213158	0.0279581	1	0.387546	1	1	1	1	1
	group_16802	sdgD	Gentisate 1,2-dioxygenase	3	6	190	81	1.5544	93.1034	0.213158	0.0279581	1	0.387546	1	1	1	1	1
	group_16803	gbpR_1	HTH-type transcriptional regulator GbpR	3	6	190	81	1.5544	93.1034	0.213158	0.0279581	1	0.387546	1	1	1	1	1
	group_16804	fecR_11	Protein FecR	3	6	190	81	1.5544	93.1034	0.213158	0.0279581	1	0.387546	1	1	1	1	1
	group_16825		hypothetical protein	3	6	190	81	1.5544	93.1034	0.213158	0.0279581	1	0.387546	1	1	1	1	1
	group_16826	dmlR_21	HTH-type transcriptional regulator DmlR	3	6	190	81	1.5544	93.1034	0.213158	0.0279581	1	0.387546	1	1	1	1	1
	group_16827		hypothetical protein	3	6	190	81	1.5544	93.1034	0.213158	0.0279581	1	0.387546	1	1	1	1	1
	group_16833		hypothetical protein	3	6	190	81	1.5544	93.1034	0.213158	0.0279581	1	0.387546	1	1	1	1	1
	bioC_1		Malonyl-[acyl-carrier protein] O-methyltransferase	3	6	190	81	1.5544	93.1034	0.213158	0.0279581	1	0.387546	1	1	1	1	1
	group_16835	lgrE_2	Linear gramicidin dehydrogenase LgrE	3	6	190	81	1.5544	93.1034	0.213158	0.0279581	1	0.387546	1	1	1	1	1
	group_16836	iucB	N(6)-hydroxylysine O-acetyltransferase	3	6	190	81	1.5544	93.1034	0.213158	0.0279581	1	0.387546	1	1	1	1	1
	group_16837		hypothetical protein	3	6	190	81	1.5544	93.1034	0.213158	0.0279581	1	0.387546	1	1	1	1	1
	group_16838	aaeA_4	p-hydroxybenzoic acid efflux pump subunit AaeA	3	6	190	81	1.5544	93.1034	0.213158	0.0279581	1	0.387546	1	1	1	1	1
	group_16839		putative protein	3	6	190	81	1.5544	93.1034	0.213158	0.0279581	1	0.387546	1	1	1	1	1
	group_16840	cadA_2	Cadmium, zinc and cobalt-transporting ATPase	3	6	190	81	1.5544	93.1034	0.213158	0.0279581	1	0.387546	1	1	1	1	1
	group_16841		hypothetical protein	3	6	190	81	1.5544	93.1034	0.213158	0.0279581	1	0.387546	1	1	1	1	1
	group_16842	hflK_1	Modulator of FtsH protease HflK	3	6	190	81	1.5544	93.1034	0.213158	0.0279581	1	0.387546	1	1	1	1	1
	group_16843		hypothetical protein	3	6	190	81	1.5544	93.1034	0.213158	0.0279581	1	0.387546	1	1	1	1	1
	group_16844		hypothetical protein	3	6	190	81	1.5544	93.1034	0.213158	0.0279581	1	0.387546	1	1	1	1	1
	group_16877	ctpF	putative cation-transporting ATPase F	3	6	190	81	1.5544	93.1034	0.213158	0.0279581	1	0.387546	1	1	1	1	1
	group_16878	bepA_3	Beta-barrel assembly-enhancing protease	3	6	190	81	1.5544	93.1034	0.213158	0.0279581	1	0.387546	1	1	1	1	1
	group_16879		hypothetical protein	3	6	190	81	1.5544	93.1034	0.213158	0.0279581	1	0.387546	1	1	1	1	1
	group_16880		putative protein	3	6	190	81	1.5544	93.1034	0.213158	0.0279581	1	0.387546	1	1	1	1	1
	npcC		Hydroxyquinol 1,2-dioxygenase	3	6	190	81	1.5544	93.1034	0.213158	0.0279581	1	0.387546	1	1	1	1	1
	group_16882	tfdF	Maleylacetate reductase	3	6	190	81	1.5544	93.1034	0.213158	0.0279581	1	0.387546	1	1	1	1	1
	group_16883		hypothetical protein	3	6	190	81	1.5544	93.1034	0.213158	0.0279581	1	0.387546	1	1	1	1	1
	group_16884		hypothetical protein	3	6	190	81	1.5544	93.1034	0.213158	0.0279581	1	0.387546	1	1	1	1	1
	ais		Aconitate isomerase	3	6	190	81	1.5544	93.1034	0.213158	0.0279581	1	0.387546	1	1	1	1	1
	group_16886	helD	DNA helicase IV	3	6	190	81	1.5544	93.1034	0.213158	0.0279581	1	0.387546	1	1	1	1	1
	group_16887		Putative O-methyltransferase	3	6	190	81	1.5544	93.1034	0.213158	0.0279581	1	0.387546	1	1	1	1	1
	group_16888		hypothetical protein	3	6	190	81	1.5544	93.1034	0.213158	0.0279581	1	0.387546	1	1	1	1	1
	group_16889	accC_1	Biotin carboxylase	3	6	190	81	1.5544	93.1034	0.213158	0.0279581	1	0.387546	1	1	1	1	1
	pcpR_3		PCP degradation transcriptional activation protein	3	6	190	81	1.5544	93.1034	0.213158	0.0279581	1	0.387546	1	1	1	1	1
	group_16891		hypothetical protein	3	6	190	81	1.5544	93.1034	0.213158	0.0279581	1	0.387546	1	1	1	1	1
	group_16892		hypothetical protein	3	6	190	81	1.5544	93.1034	0.213158	0.0279581	1	0.387546	1	1	1	1	1
	group_16893		hypothetical protein	3	6	190	81	1.5544	93.1034	0.213158	0.0279581	1	0.387546	1	1	1	1	1
	group_16894	czcO	putative oxidoreductase CzcO	3	6	190	81	1.5544	93.1034	0.213158	0.0279581	1	0.387546	1	1	1	1	1
	group_16895	pchA_1	Salicylate biosynthesis isochorismate synthase	3	6	190	81	1.5544	93.1034	0.213158	0.0279581	1	0.387546	1	1	1	1	1
	group_16896	pikAV	Thioesterase PikA5	3	6	190	81	1.5544	93.1034	0.213158	0.0279581	1	0.387546	1	1	1	1	1
	group_16897	fptA	Fe(3+)-pyochelin receptor	3	6	190	81	1.5544	93.1034	0.213158	0.0279581	1	0.387546	1	1	1	1	1
	group_16898		hypothetical protein	3	6	190	81	1.5544	93.1034	0.213158	0.0279581	1	0.387546	1	1	1	1	1
	group_16899	mdtJ	Spermidine export protein MdtJ	3	6	190	81	1.5544	93.1034	0.213158	0.0279581	1	0.387546	1	1	1	1	1
	group_16900	mdtI	Spermidine export protein MdtI	3	6	190	81	1.5544	93.1034	0.213158	0.0279581	1	0.387546	1	1	1	1	1
	group_16901		Baeyer-Villiger monooxygenase	3	6	190	81	1.5544	93.1034	0.213158	0.0279581	1	0.387546	1	1	1	1	1
	group_16902		hypothetical protein	3	6	190	81	1.5544	93.1034	0.213158	0.0279581	1	0.387546	1	1	1	1	1
	group_16903	sbcD	Nuclease SbcCD subunit D	3	6	190	81	1.5544	93.1034	0.213158	0.0279581	1	0.387546	1	1	1	1	1
	group_16904	recD	RecBCD enzyme subunit RecD	3	6	190	81	1.5544	93.1034	0.213158	0.0279581	1	0.387546	1	1	1	1	1
	group_16905	recB	RecBCD enzyme subunit RecB	3	6	190	81	1.5544	93.1034	0.213158	0.0279581	1	0.387546	1	1	1	1	1
	group_16906	lipL	Octanoyl-[GcvH]:protein N-octanoyltransferase	3	6	190	81	1.5544	93.1034	0.213158	0.0279581	1	0.387546	1	1	1	1	1
	group_16907	srpC_3	putative chromate transport protein	3	6	190	81	1.5544	93.1034	0.213158	0.0279581	1	0.387546	1	1	1	1	1
	group_16908	cckA	Sensor kinase CckA	3	6	190	81	1.5544	93.1034	0.213158	0.0279581	1	0.387546	1	1	1	1	1
	group_16909		hypothetical protein	3	6	190	81	1.5544	93.1034	0.213158	0.0279581	1	0.387546	1	1	1	1	1
	group_16910		hypothetical protein	3	6	190	81	1.5544	93.1034	0.213158	0.0279581	1	0.387546	1	1	1	1	1
	group_16911	algB_3	Alginate biosynthesis transcriptional regulatory protein AlgB	3	6	190	81	1.5544	93.1034	0.213158	0.0279581	1	0.387546	1	1	1	1	1
	group_16912		hypothetical protein	3	6	190	81	1.5544	93.1034	0.213158	0.0279581	1	0.387546	1	1	1	1	1
	group_16913		hypothetical protein	3	6	190	81	1.5544	93.1034	0.213158	0.0279581	1	0.387546	1	1	1	1	1
	group_16914		hypothetical protein	3	6	190	81	1.5544	93.1034	0.213158	0.0279581	1	0.387546	1	1	1	1	1
	group_16915		hypothetical protein	3	6	190	81	1.5544	93.1034	0.213158	0.0279581	1	0.387546	1	1	1	1	1
	group_16916		hypothetical protein	3	6	190	81	1.5544	93.1034	0.213158	0.0279581	1	0.387546	1	1	1	1	1
	group_16917		hypothetical protein	3	6	190	81	1.5544	93.1034	0.213158	0.0279581	1	0.387546	1	1	1	1	1
	group_16918		hypothetical protein	3	6	190	81	1.5544	93.1034	0.213158	0.0279581	1	0.387546	1	1	1	1	1
	group_16925	yqcC	putative protein YqcC	3	6	190	81	1.5544	93.1034	0.213158	0.0279581	1	0.387546	1	1	1	1	1
	group_16926	bepA_6	Beta-barrel assembly-enhancing protease	3	6	190	81	1.5544	93.1034	0.213158	0.0279581	1	0.387546	1	1	1	1	1
	group_16927		hypothetical protein	3	6	190	81	1.5544	93.1034	0.213158	0.0279581	1	0.387546	1	1	1	1	1
	crp_2		cAMP-activated global transcriptional regulator CRP	3	6	190	81	1.5544	93.1034	0.213158	0.0279581	1	0.387546	1	1	1	1	1
	group_16929	hmuT	Hemin-binding periplasmic protein HmuT	3	6	190	81	1.5544	93.1034	0.213158	0.0279581	1	0.387546	1	1	1	1	1
	group_16930	hemS	Hemin transport protein HemS	3	6	190	81	1.5544	93.1034	0.213158	0.0279581	1	0.387546	1	1	1	1	1
	group_16931		hypothetical protein	3	6	190	81	1.5544	93.1034	0.213158	0.0279581	1	0.387546	1	1	1	1	1
	group_16932		hypothetical protein	3	6	190	81	1.5544	93.1034	0.213158	0.0279581	1	0.387546	1	1	1	1	1
	group_16933	sfsA	Sugar fermentation stimulation protein A	3	6	190	81	1.5544	93.1034	0.213158	0.0279581	1	0.387546	1	1	1	1	1
	folK_2		2-amino-4-hydroxy-6-hydroxymethyldihydropteridine pyrophosphokinase	3	6	190	81	1.5544	93.1034	0.213158	0.0279581	1	0.387546	1	1	1	1	1
	group_16935		hypothetical protein	3	6	190	81	1.5544	93.1034	0.213158	0.0279581	1	0.387546	1	1	1	1	1
	group_16936	folP	Dihydropteroate synthase	3	6	190	81	1.5544	93.1034	0.213158	0.0279581	1	0.387546	1	1	1	1	1
	group_16937		hypothetical protein	3	6	190	81	1.5544	93.1034	0.213158	0.0279581	1	0.387546	1	1	1	1	1
	group_16938	grpE	Protein GrpE	3	6	190	81	1.5544	93.1034	0.213158	0.0279581	1	0.387546	1	1	1	1	1
	group_16939	rnfH	hypothetical protein	3	6	190	81	1.5544	93.1034	0.213158	0.0279581	1	0.387546	1	1	1	1	1
	group_16940	qseC_2	Sensor protein QseC	3	6	190	81	1.5544	93.1034	0.213158	0.0279581	1	0.387546	1	1	1	1	1
	group_16941		hypothetical protein	3	6	190	81	1.5544	93.1034	0.213158	0.0279581	1	0.387546	1	1	1	1	1
	group_16942	eamA_3	putative amino-acid metabolite efflux pump	3	6	190	81	1.5544	93.1034	0.213158	0.0279581	1	0.387546	1	1	1	1	1
	group_16943		Cyclic di-GMP phosphodiesterase	3	6	190	81	1.5544	93.1034	0.213158	0.0279581	1	0.387546	1	1	1	1	1
	group_16944		hypothetical protein	3	6	190	81	1.5544	93.1034	0.213158	0.0279581	1	0.387546	1	1	1	1	1
	group_16945		hypothetical protein	3	6	190	81	1.5544	93.1034	0.213158	0.0279581	1	0.387546	1	1	1	1	1
	group_16946		putative protein	3	6	190	81	1.5544	93.1034	0.213158	0.0279581	1	0.387546	1	1	1	1	1
	group_16947		hypothetical protein	3	6	190	81	1.5544	93.1034	0.213158	0.0279581	1	0.387546	1	1	1	1	1
	group_16948	gcvH_3	Glycine cleavage system H protein	3	6	190	81	1.5544	93.1034	0.213158	0.0279581	1	0.387546	1	1	1	1	1
	arnT		Undecaprenyl phosphate-alpha-4-amino-4-deoxy-L-arabinose arabinosyl transferase	3	6	190	81	1.5544	93.1034	0.213158	0.0279581	1	0.387546	1	1	1	1	1
	group_16950		hypothetical protein	3	6	190	81	1.5544	93.1034	0.213158	0.0279581	1	0.387546	1	1	1	1	1
	group_16951		hypothetical protein	3	6	190	81	1.5544	93.1034	0.213158	0.0279581	1	0.387546	1	1	1	1	1
	group_16952		hypothetical protein	3	6	190	81	1.5544	93.1034	0.213158	0.0279581	1	0.387546	1	1	1	1	1
	group_16953		hypothetical protein	3	6	190	81	1.5544	93.1034	0.213158	0.0279581	1	0.387546	1	1	1	1	1
	group_16954		hypothetical protein	3	6	190	81	1.5544	93.1034	0.213158	0.0279581	1	0.387546	1	1	1	1	1
	group_16955		hypothetical protein	3	6	190	81	1.5544	93.1034	0.213158	0.0279581	1	0.387546	1	1	1	1	1
	group_16956	nat	Arylamine N-acetyltransferase	3	6	190	81	1.5544	93.1034	0.213158	0.0279581	1	0.387546	1	1	1	1	1
	group_16957		hypothetical protein	3	6	190	81	1.5544	93.1034	0.213158	0.0279581	1	0.387546	1	1	1	1	1
	group_16958	entH	Proofreading thioesterase EntH	3	6	190	81	1.5544	93.1034	0.213158	0.0279581	1	0.387546	1	1	1	1	1
	group_16959	acrR	HTH-type transcriptional regulator AcrR	3	6	190	81	1.5544	93.1034	0.213158	0.0279581	1	0.387546	1	1	1	1	1
	group_16960	baiA	putative oxidoreductase	3	6	190	81	1.5544	93.1034	0.213158	0.0279581	1	0.387546	1	1	1	1	1
	group_16961		hypothetical protein	3	6	190	81	1.5544	93.1034	0.213158	0.0279581	1	0.387546	1	1	1	1	1
	group_16962		hypothetical protein	3	6	190	81	1.5544	93.1034	0.213158	0.0279581	1	0.387546	1	1	1	1	1
	group_16963		hypothetical protein	3	6	190	81	1.5544	93.1034	0.213158	0.0279581	1	0.387546	1	1	1	1	1
	group_16964	yfcD	putative Nudix hydrolase YfcD	3	6	190	81	1.5544	93.1034	0.213158	0.0279581	1	0.387546	1	1	1	1	1
	group_16965		hypothetical protein	3	6	190	81	1.5544	93.1034	0.213158	0.0279581	1	0.387546	1	1	1	1	1
	group_16966		hypothetical protein	3	6	190	81	1.5544	93.1034	0.213158	0.0279581	1	0.387546	1	1	1	1	1
	group_16967		hypothetical protein	3	6	190	81	1.5544	93.1034	0.213158	0.0279581	1	0.387546	1	1	1	1	1
	group_16968		hypothetical protein	3	6	190	81	1.5544	93.1034	0.213158	0.0279581	1	0.387546	1	1	1	1	1
	group_16969	bmrR	Multidrug-efflux transporter 1 regulator	3	6	190	81	1.5544	93.1034	0.213158	0.0279581	1	0.387546	1	1	1	1	1
	group_16970	fecR_10	Protein FecR	3	6	190	81	1.5544	93.1034	0.213158	0.0279581	1	0.387546	1	1	1	1	1
	group_16971	fecI_10	putative RNA polymerase sigma factor FecI	3	6	190	81	1.5544	93.1034	0.213158	0.0279581	1	0.387546	1	1	1	1	1
	group_16972	pcaK_5	4-hydroxybenzoate transporter PcaK	3	6	190	81	1.5544	93.1034	0.213158	0.0279581	1	0.387546	1	1	1	1	1
	ophA1		Phthalate dioxygenase reductase	3	6	190	81	1.5544	93.1034	0.213158	0.0279581	1	0.387546	1	1	1	1	1
	gntR_4		putative D-xylose utilization operon transcriptional repressor	3	6	190	81	1.5544	93.1034	0.213158	0.0279581	1	0.387546	1	1	1	1	1
	group_16975		hypothetical protein	3	6	190	81	1.5544	93.1034	0.213158	0.0279581	1	0.387546	1	1	1	1	1
	group_16976		putative protein	3	6	190	81	1.5544	93.1034	0.213158	0.0279581	1	0.387546	1	1	1	1	1
	group_16977		putative protein	3	6	190	81	1.5544	93.1034	0.213158	0.0279581	1	0.387546	1	1	1	1	1
	group_16978	nnr	Bifunctional NAD(P)H-hydrate repair enzyme Nnr	3	6	190	81	1.5544	93.1034	0.213158	0.0279581	1	0.387546	1	1	1	1	1
	group_16979		hypothetical protein	3	6	190	81	1.5544	93.1034	0.213158	0.0279581	1	0.387546	1	1	1	1	1
	group_16980		hypothetical protein	3	6	190	81	1.5544	93.1034	0.213158	0.0279581	1	0.387546	1	1	1	1	1
	group_17017		hypothetical protein	3	6	190	81	1.5544	93.1034	0.213158	0.0279581	1	0.387546	1	1	1	1	1
	pknB		Serine/threonine-protein kinase PknB	3	6	190	81	1.5544	93.1034	0.213158	0.0279581	1	0.387546	1	1	1	1	1
	group_17019	resE	Sensor histidine kinase ResE	3	6	190	81	1.5544	93.1034	0.213158	0.0279581	1	0.387546	1	1	1	1	1
	yxlF_1		putative ABC transporter ATP-binding protein YxlF	3	6	190	81	1.5544	93.1034	0.213158	0.0279581	1	0.387546	1	1	1	1	1
	group_17021		hypothetical protein	3	6	190	81	1.5544	93.1034	0.213158	0.0279581	1	0.387546	1	1	1	1	1
	group_17022		hypothetical protein	3	6	190	81	1.5544	93.1034	0.213158	0.0279581	1	0.387546	1	1	1	1	1
	group_17031	hxuB_3	Heme/hemopexin transporter protein HuxB	3	6	190	81	1.5544	93.1034	0.213158	0.0279581	1	0.387546	1	1	1	1	1
	group_17032	zapE_3	Cell division protein ZapE	3	6	190	81	1.5544	93.1034	0.213158	0.0279581	1	0.387546	1	1	1	1	1
	group_17033	ypeA	Acetyltransferase YpeA	3	6	190	81	1.5544	93.1034	0.213158	0.0279581	1	0.387546	1	1	1	1	1
	group_17034		hypothetical protein	3	6	190	81	1.5544	93.1034	0.213158	0.0279581	1	0.387546	1	1	1	1	1
	group_17058		hypothetical protein	3	6	190	81	1.5544	93.1034	0.213158	0.0279581	1	0.387546	1	1	1	1	1
	group_17066		hypothetical protein	3	6	190	81	1.5544	93.1034	0.213158	0.0279581	1	0.387546	1	1	1	1	1
	group_17067	yceJ_2	Cytochrome b561	3	6	190	81	1.5544	93.1034	0.213158	0.0279581	1	0.387546	1	1	1	1	1
	group_17068	trpI_1	HTH-type transcriptional regulator TrpI	3	6	190	81	1.5544	93.1034	0.213158	0.0279581	1	0.387546	1	1	1	1	1
	group_17069	rhtC_5	Threonine efflux protein	3	6	190	81	1.5544	93.1034	0.213158	0.0279581	1	0.387546	1	1	1	1	1
	group_17070		hypothetical protein	3	6	190	81	1.5544	93.1034	0.213158	0.0279581	1	0.387546	1	1	1	1	1
	group_17071		hypothetical protein	3	6	190	81	1.5544	93.1034	0.213158	0.0279581	1	0.387546	1	1	1	1	1
[truncated: 836 more rows]

## Sheet: Suppl. Table 4
Suppl. Table 4. Pyseer output file showing genes / COGs significantly associated with greater biofilm production at 22°C than 37°C.
variant	af	filter-pvalue	lrt-pvalue	beta	beta-std-err	intercept	PC1	PC2	PC3	PC4	notes
group_8321	0.243	5.22e-06	0.0001	1.92	0.561	0.47	-1.24	-0.18	0.142	0.0599
group_15072	0.286	5.82e-06	0.0001	1.68	0.483	0.436	-1.18	-0.27	0.0658	0.168
group_15041	0.268	8.1e-06	0.0002	1.65	0.494	0.472	-1.23	-0.206	-0.00268	0.12
group_11114	0.5	0.00125	0.0002	1.5	0.414	0.114	-0.873	-0.852	-0.725	0.613
group_1519	0.282	8.16e-06	0.0003	1.57	0.48	0.464	-1.24	-0.107	0.0299	0.027
group_11043_arsC_1	0.279	1.14e-05	0.0003	1.55	0.476	0.474	-1.23	-0.197	-0.0411	0.0899
acr3	0.279	1.14e-05	0.0003	1.55	0.476	0.474	-1.23	-0.197	-0.0411	0.0899
arsC_2	0.279	1.14e-05	0.0003	1.55	0.476	0.474	-1.23	-0.197	-0.0411	0.0899
group_11046	0.279	1.14e-05	0.0003	1.55	0.476	0.474	-1.23	-0.197	-0.0411	0.0899
arsH_1	0.279	1.14e-05	0.0003	1.55	0.476	0.474	-1.23	-0.197	-0.0411	0.0899
ydfG	0.261	1.57e-05	0.0003	1.62	0.498	0.486	-1.23	-0.234	-0.0151	0.217
group_15062	0.261	1.57e-05	0.0003	1.62	0.498	0.486	-1.23	-0.234	-0.0151	0.217
group_3009	0.257	0.000257	0.0003	1.37	0.403	0.541	-1.31	-0.315	-0.848	0.507
clsA	0.15	0.00106	0.0003	1.69	0.556	0.647	-1.45	-0.131	-1.06	0.504
group_2314	0.279	1.14e-05	0.0004	1.54	0.481	0.476	-1.25	-0.0974	0.00744	0.0278
group_832	0.275	1.59e-05	0.0004	1.51	0.472	0.487	-1.24	-0.199	-0.0811	0.144
group_5435	0.361	0.00178	0.0004	-1.13	0.326	1.28	-2.1	0.433	-0.674	0.717
group_5843	0.125	0.00211	0.0004	1.82	0.629	0.67	-1.48	-0.104	-1.09	0.522
fliC	0.389	0.00896	0.0004	1.24	0.37	0.389	-1.74	0.583	-0.976	0.972
group_11053	0.275	1.59e-05	0.0005	1.5	0.47	0.489	-1.24	-0.194	-0.0924	0.14
qorB	0.275	1.59e-05	0.0005	1.5	0.47	0.489	-1.24	-0.194	-0.0924	0.14
group_11058	0.3	2.09e-05	0.0005	1.43	0.438	0.467	-1.22	-0.28	-0.143	0.246
trxC	0.146	0.00141	0.0005	1.64	0.555	0.656	-1.46	-0.101	-1.04	0.526
group_11042	0.225	2.69e-05	0.0006	1.69	0.559	0.531	-1.31	-0.113	-0.00703	0.089
group_3972	0.132	0.00426	0.0006	1.67	0.568	0.671	-1.55	0.225	-1.1	0.764
group_15038	0.271	2.2e-05	0.0007	1.46	0.471	0.501	-1.26	-0.184	-0.112	0.149
group_15039	0.271	2.2e-05	0.0007	1.46	0.471	0.501	-1.26	-0.184	-0.112	0.149
group_15040	0.271	2.2e-05	0.0007	1.46	0.471	0.501	-1.26	-0.184	-0.112	0.149
group_15049	0.186	5.41e-05	0.0008	1.96	0.675	0.556	-1.34	-0.164	0.0783	0.109
hspA_2	0.143	0.00187	0.0008	1.6	0.555	0.664	-1.47	-0.092	-1.04	0.529
group_14601	0.0821	0.000221	0.0009	-1.53	0.476	0.973	-1.77	0.192	-0.8	0.455
tfdF	0.0821	0.000221	0.0009	-1.53	0.476	0.973	-1.77	0.192	-0.8	0.455
chqB	0.0821	0.000221	0.0009	-1.53	0.476	0.973	-1.77	0.192	-0.8	0.455
yciI_2	0.0821	0.000221	0.0009	-1.53	0.476	0.973	-1.77	0.192	-0.8	0.455
bepA_6	0.0821	0.000221	0.0009	-1.53	0.476	0.973	-1.77	0.192	-0.8	0.455
group_15344	0.0821	0.000221	0.0009	-1.53	0.476	0.973	-1.77	0.192	-0.8	0.455
group_2712	0.0821	0.000221	0.0009	-1.53	0.476	0.973	-1.77	0.192	-0.8	0.455
group_5722	0.139	0.00246	0.0009	1.58	0.555	0.671	-1.51	0.19	-1.03	0.597
group_5652	0.189	0.00525	0.0009	1.32	0.444	0.631	-2.11	-0.0307	-1.04	0.374
ftsH4	0.186	0.00236	0.001	1.32	0.444	0.634	-1.44	-0.109	-1.05	0.587
group_3537	0.139	0.00246	0.001	1.58	0.557	0.669	-1.47	-0.0978	-1.04	0.538
kefC_1	0.136	0.00324	0.001	1.57	0.556	0.672	-1.48	-0.0793	-1.07	0.534
merR_1	0.264	4.17e-05	0.0011	1.42	0.475	0.516	-1.27	-0.207	-0.13	0.236
agaA	0.514	0.00551	0.0011	1.25	0.393	0.209	-1.46	-0.699	-0.756	0.579
group_11230	0.196	0.0247	0.0011	-1.16	0.358	1.1	-1.7	0.0117	-1.55	0.305
group_11055	0.304	5.18e-05	0.0013	1.28	0.425	0.494	-1.25	-0.253	-0.23	0.258
group_11056	0.304	5.18e-05	0.0013	1.28	0.425	0.494	-1.25	-0.253	-0.23	0.258
group_11057	0.304	5.18e-05	0.0013	1.28	0.425	0.494	-1.25	-0.253	-0.23	0.258
group_11060	0.304	5.18e-05	0.0013	1.28	0.425	0.494	-1.25	-0.253	-0.23	0.258
group_15054	0.304	5.18e-05	0.0013	1.28	0.425	0.494	-1.25	-0.253	-0.23	0.258
copA_4	0.304	5.18e-05	0.0013	1.28	0.425	0.494	-1.25	-0.253	-0.23	0.258
group_15056	0.304	5.18e-05	0.0013	1.28	0.425	0.494	-1.25	-0.253	-0.23	0.258
group_15057	0.304	5.18e-05	0.0013	1.28	0.425	0.494	-1.25	-0.253	-0.23	0.258
group_15058	0.304	5.18e-05	0.0013	1.28	0.425	0.494	-1.25	-0.253	-0.23	0.258
group_15059	0.304	5.18e-05	0.0013	1.28	0.425	0.494	-1.25	-0.253	-0.23	0.258
ldhA_1	0.304	5.18e-05	0.0013	1.28	0.425	0.494	-1.25	-0.253	-0.23	0.258
ubiB_2	0.304	5.18e-05	0.0013	1.28	0.425	0.494	-1.25	-0.253	-0.23	0.258
zntR_2	0.304	5.18e-05	0.0013	1.28	0.425	0.494	-1.25	-0.253	-0.23	0.258
ackA_1	0.304	5.18e-05	0.0013	1.28	0.425	0.494	-1.25	-0.253	-0.23	0.258
group_15065	0.304	5.18e-05	0.0013	1.28	0.425	0.494	-1.25	-0.253	-0.23	0.258
merP_1	0.304	5.18e-05	0.0013	1.28	0.425	0.494	-1.25	-0.253	-0.23	0.258
group_21156	0.304	5.18e-05	0.0013	1.28	0.425	0.494	-1.25	-0.253	-0.23	0.258
deoA	0.304	5.18e-05	0.0013	1.28	0.425	0.494	-1.25	-0.253	-0.23	0.258
tetA_1	0.304	5.18e-05	0.0013	1.28	0.425	0.494	-1.25	-0.253	-0.23	0.258
group_8329	0.304	5.18e-05	0.0013	1.28	0.425	0.494	-1.25	-0.253	-0.23	0.258
xfp	0.304	5.18e-05	0.0013	1.28	0.425	0.494	-1.25	-0.253	-0.23	0.258
group_11300	0.25	0.00135	0.0013	1.22	0.397	0.572	-1.35	-0.302	-0.883	0.538
yheS_2	0.907	0.000424	0.0014	1.4	0.443	-0.418	-1.79	0.186	-0.819	0.495
spo0C_1	0.114	0.00126	0.0014	1.89	0.749	0.697	-1.5	0.0907	-0.937	0.245
group_2910	0.132	0.00426	0.0014	1.53	0.557	0.679	-1.49	-0.071	-1.07	0.538
menH_2	0.604	0.00552	0.0015	0.969	0.31	0.281	-2.08	0.357	-0.77	0.654
group_6410	0.211	0.00022	0.0016	-1.12	0.359	1.09	-1.86	0.253	-0.398	0.426
group_4780	0.118	0.00367	0.0016	1.89	0.684	0.666	-1.47	0.392	-0.949	-0.124
group_858	0.15	0.0314	0.0016	-1.23	0.391	1.05	-1.95	-0.0161	-1.47	0.259
group_227	0.0857	8.12e-05	0.0019	-1.45	0.479	0.966	-1.33	0.163	-0.77	0.539
group_15094	0.0929	0.00684	0.0019	1.86	0.752	0.717	-1.57	0.0827	-1.08	0.543
gno_1	0.386	0.0112	0.002	1.18	0.402	0.411	-1.22	0.634	-0.869	0.845
group_3489	0.0857	0.0118	0.002	1.97	0.803	0.726	-1.81	0.0256	-1.13	0.414
group_1838	0.121	0.00945	0.0021	1.51	0.564	0.695	-1.57	0.178	-1.11	0.677
group_10490	0.118	1.68e-05	0.0022	-1.4	0.465	1.01	-0.352	0.185	-0.799	0.439
group_10491	0.118	1.68e-05	0.0022	-1.4	0.465	1.01	-0.352	0.185	-0.799	0.439
puuC_4	0.118	1.68e-05	0.0022	-1.4	0.465	1.01	-0.352	0.185	-0.799	0.439
group_15037	0.246	5.64e-05	0.0022	1.39	0.494	0.548	-1.33	-0.0492	-0.149	0.0848
group_10492	0.0857	0.000502	0.0022	-1.39	0.462	0.965	-1.75	0.182	-0.789	0.457
atsA_2	0.0786	0.000585	0.0022	-1.44	0.48	0.959	-1.76	0.178	-0.827	0.457
group_15051	0.271	7.7e-05	0.0023	1.29	0.456	0.531	-1.29	-0.197	-0.207	0.25
group_15052	0.271	7.7e-05	0.0023	1.29	0.456	0.531	-1.29	-0.197	-0.207	0.25
group_15053	0.271	7.7e-05	0.0023	1.29	0.456	0.531	-1.29	-0.197	-0.207	0.25
group_8326	0.271	7.7e-05	0.0023	1.29	0.456	0.531	-1.29	-0.197	-0.207	0.25
group_15073	0.193	0.000116	0.0024	1.65	0.612	0.58	-1.36	-0.145	-0.0768	0.149
group_2785	0.132	0.0358	0.0024	-1.22	0.403	1.02	-1.92	0.0106	-1.43	0.347
group_8078	0.214	0.000351	0.0025	-1.07	0.358	1.08	-1.85	0.25	-0.418	0.424
group_3019	0.207	0.00404	0.0025	1.2	0.429	0.624	-1.43	0.265	-0.891	0.779
group_4074	0.143	0.00612	0.0025	1.37	0.509	0.678	-1.49	-0.0739	-1.07	0.534
group_15048	0.239	0.000105	0.0026	1.38	0.499	0.555	-1.32	-0.202	-0.197	0.207
group_6777	0.132	0.00426	0.0026	1.45	0.556	0.689	-1.51	-0.0541	-1.05	0.435
group_4056	0.146	0.0047	0.0026	1.36	0.508	0.678	-1.52	0.189	-0.998	0.577
group_15645	0.414	0.0178	0.0028	1.11	0.392	0.399	-1.22	0.641	-0.957	0.767
group_5988	0.486	0.0118	0.0029	-1.16	0.396	1.41	-1.47	-0.655	-0.797	0.581
ccoN1_3	0.957	0.000777	0.0031	1.88	0.692	-0.955	-1.51	0.122	-0.934	0.556
group_245	0.225	0.000101	0.0032	1.37	0.51	0.58	-1.36	-0.0751	-0.225	0.166
group_2117	0.204	0.00521	0.0032	1.17	0.429	0.632	-1.44	0.256	-0.901	0.78
cusR	0.375	9.58e-05	0.0033	1.08	0.382	0.463	-1.5	-0.178	-0.235	0.141
dps	0.0964	0.000165	0.0033	-1.53	0.528	0.998	-0.273	-0.101	-1.1	0.371
copB_1	0.375	9.58e-05	0.0035	1.07	0.382	0.465	-1.5	-0.163	-0.234	0.131
group_4757	0.104	0.0109	0.0041	1.58	0.643	0.713	-1.56	0.179	-1.01	0.674
cusA	0.339	7.51e-05	0.0042	1.07	0.39	0.509	-1.27	-0.138	-0.315	0.149
group_4643	0.129	0.00257	0.0045	-1.09	0.382	0.989	-1.82	0.0493	-0.827	0.644
group_2504	0.2	0.00669	0.0045	1.14	0.431	0.64	-1.45	0.254	-0.897	0.766
group_2557	0.2	0.00669	0.0045	1.14	0.431	0.64	-1.45	0.254	-0.897	0.766
group_4828	0.2	0.00669	0.0045	1.14	0.431	0.64	-1.45	0.254	-0.897	0.766
group_11061	0.371	0.00013	0.0046	1.04	0.383	0.477	-1.5	-0.165	-0.254	0.146
group_12084	0.371	0.00013	0.0046	1.04	0.383	0.477	-1.5	-0.165	-0.254	0.146
copA_3	0.371	0.00013	0.0046	1.04	0.383	0.477	-1.5	-0.165	-0.254	0.146
copC	0.371	0.00013	0.0046	1.04	0.383	0.477	-1.5	-0.165	-0.254	0.146
copD	0.371	0.00013	0.0046	1.04	0.383	0.477	-1.5	-0.165	-0.254	0.146
copK	0.371	0.00013	0.0046	1.04	0.383	0.477	-1.5	-0.165	-0.254	0.146
group_5454	0.371	0.00013	0.0046	1.04	0.383	0.477	-1.5	-0.165	-0.254	0.146
group_8331	0.371	0.00013	0.0046	1.04	0.383	0.477	-1.5	-0.165	-0.254	0.146
group_9173	0.371	0.00013	0.0046	1.04	0.383	0.477	-1.5	-0.165	-0.254	0.146
intS_2	0.346	0.000124	0.0048	1.07	0.397	0.496	-1.53	-0.104	-0.237	0.0681
group_8565	0.0429	0.00646	0.005	-1.76	0.654	0.922	-1.76	-0.0562	-1.02	0.62
group_2543	0.436	0.0395	0.005	0.969	0.357	0.43	-1.66	0.54	-1	0.733
group_6411	0.757	2.95e-05	0.0051	0.997	0.359	0.0943	-0.839	0.23	-0.476	0.415
group_15032	0.254	0.000106	0.0051	1.24	0.477	0.564	-1.35	-0.0234	-0.211	0.0932
group_15033	0.254	0.000106	0.0051	1.24	0.477	0.564	-1.35	-0.0234	-0.211	0.0932
group_15034	0.254	0.000106	0.0051	1.24	0.477	0.564	-1.35	-0.0234	-0.211	0.0932
group_15035	0.254	0.000106	0.0051	1.24	0.477	0.564	-1.35	-0.0234	-0.211	0.0932
group_15036	0.254	0.000106	0.0051	1.24	0.477	0.564	-1.35	-0.0234	-0.211	0.0932
hspA_1	0.168	0.00861	0.0051	1.15	0.446	0.673	-1.48	-0.0635	-1.05	0.565
group_11931	0.221	0.0102	0.0051	0.987	0.374	0.647	-1.59	0.0698	-1.15	0.268
rmf	0.789	0.00073	0.0054	0.994	0.36	0.0643	-1.83	0.23	-0.457	0.418
group_8918	0.164	0.011	0.0054	1.14	0.445	0.676	-1.48	-0.0456	-1.07	0.57
group_838	0.196	0.00856	0.0056	1.11	0.431	0.646	-1.46	0.245	-0.908	0.77
group_5568	0.111	0.00878	0.0057	-1.17	0.425	0.982	-1.82	-0.153	-1.07	0.271
group_1021	0.146	0.008	0.0058	-0.984	0.354	0.997	-1.85	0.0993	-1.06	0.347
group_12151	0.161	0.0141	0.0063	1.12	0.446	0.68	-1.49	-0.0531	-1.08	0.572
degP_2	0.161	0.0141	0.0063	1.12	0.446	0.68	-1.49	-0.0531	-1.08	0.572
group_4787	0.121	0.00945	0.0071	1.51	0.615	0.687	-1.5	0.34	-0.971	-0.0365
cusB	0.332	0.000139	0.0072	1.01	0.395	0.529	-1.29	-0.144	-0.331	0.221
group_8237	0.9	0.000353	0.0073	1.35	0.506	-0.365	-0.45	-0.074	-1.1	0.325
group_12149	0.114	0.0159	0.0074	1.33	0.563	0.712	-1.53	-0.056	-1.07	0.501
group_2206	0.161	0.0141	0.0075	1.1	0.445	0.684	-1.49	-0.0369	-1.06	0.564
group_3094	0.864	0.000121	0.0077	1.11	0.415	-0.111	-0.66	0.164	-0.869	0.469
group_8077	0.754	4.83e-05	0.0078	0.951	0.359	0.132	-0.876	0.228	-0.489	0.408
group_15468	0.0679	0.045	0.0078	1.81	0.825	0.751	-1.79	0.014	-1.14	0.538
group_2873	0.161	0.0141	0.008	1.09	0.445	0.685	-1.49	-0.0368	-1.06	0.556
group_4823	0.175	0.0141	0.0083	1.04	0.422	0.677	-1.48	-0.0433	-1.06	0.548
rhsC_3	0.114	0.00418	0.0084	-1.07	0.404	0.968	-1.75	-0.0548	-1.02	0.241
group_5708	0.111	0.00634	0.0085	1.42	0.629	0.719	-1.53	9.48e-05	-0.97	0.35
ccoN1_2	0.0464	0.00233	0.0088	-1.57	0.628	0.914	-1.54	0.121	-0.929	0.533
group_12150	0.157	0.0179	0.0088	1.08	0.447	0.688	-1.5	-0.0445	-1.08	0.566
group_15644	0.6	0.0307	0.0092	0.8	0.309	0.367	-1.2	0.291	-1.17	0.728
group_5655	0.229	0.0153	0.0095	0.913	0.373	0.651	-1.91	-0.00188	-0.981	0.298
group_4010	0.229	0.0153	0.0096	0.912	0.373	0.651	-1.91	-0.00182	-0.981	0.3
group_2845	0.164	0.00385	0.01	1.09	0.466	0.688	-1.49	0.0379	-0.929	0.295
group_19426	0.111	0.0205	0.01	1.29	0.564	0.719	-1.54	-0.0476	-1.07	0.501
group_3475	0.146	0.0138	0.0101	1.12	0.474	0.697	-1.51	-0.0424	-1.02	0.553
group_7045	0.129	0.017	0.0104	1.18	0.511	0.709	-1.52	-0.0402	-1.06	0.488
group_11796	0.225	0.000344	0.0113	1.2	0.506	0.602	-1.36	-0.134	-0.27	0.276
group_5610	0.0393	0.0173	0.0113	-1.6	0.647	0.911	-1.77	0.0576	-1.13	0.44
valS	0.961	0.00232	0.0116	1.66	0.704	-0.757	-1.36	0.127	-0.995	0.489
group_15598	0.0321	0.019	0.0117	-1.8	0.741	0.903	-1.75	-0.0281	-1.12	0.478
group_15067	0.361	0.00032	0.0118	0.929	0.383	0.522	-1.53	-0.126	-0.332	0.173
group_11370	0.0464	0.0151	0.0122	-1.48	0.6	0.914	-1.76	0.000577	-1.04	0.561
group_15673	0.0464	0.0151	0.0122	-1.48	0.6	0.914	-1.76	0.000577	-1.04	0.561
group_5805	0.139	0.0225	0.0122	1.11	0.479	0.703	-1.51	-0.074	-1.08	0.48
group_9202	0.0964	0.0184	0.0126	1.36	0.63	0.733	-1.54	0.0489	-1.03	0.486
group_12923	0.0429	0.00646	0.0129	-1.53	0.639	0.907	-1.73	0.16	-0.972	0.381
group_21955	0.0429	0.00646	0.0129	-1.53	0.639	0.907	-1.73	0.16	-0.972	0.381
group_18740	0.168	0.0225	0.013	0.986	0.424	0.689	-1.5	-0.0378	-1.07	0.555
group_18746	0.168	0.0225	0.013	0.986	0.424	0.689	-1.5	-0.0378	-1.07	0.555
group_18747	0.168	0.0225	0.013	0.986	0.424	0.689	-1.5	-0.0378	-1.07	0.555
group_2390	0.168	0.0225	0.013	0.986	0.424	0.689	-1.5	-0.0378	-1.07	0.555
group_2391	0.168	0.0225	0.013	0.986	0.424	0.689	-1.5	-0.0378	-1.07	0.555
group_3497	0.168	0.0225	0.013	0.986	0.424	0.689	-1.5	-0.0378	-1.07	0.555
group_3499	0.168	0.0225	0.013	0.986	0.424	0.689	-1.5	-0.0378	-1.07	0.555
group_4072	0.168	0.0225	0.013	0.986	0.424	0.689	-1.5	-0.0378	-1.07	0.555
group_4073	0.168	0.0225	0.013	0.986	0.424	0.689	-1.5	-0.0378	-1.07	0.555
topB_1	0.168	0.0225	0.013	0.986	0.424	0.689	-1.5	-0.0378	-1.07	0.555
group_4095	0.168	0.0225	0.013	0.986	0.424	0.689	-1.5	-0.0378	-1.07	0.555
group_4820	0.168	0.0225	0.013	0.986	0.424	0.689	-1.5	-0.0378	-1.07	0.555
group_4821	0.168	0.0225	0.013	0.986	0.424	0.689	-1.5	-0.0378	-1.07	0.555
group_4822	0.168	0.0225	0.013	0.986	0.424	0.689	-1.5	-0.0378	-1.07	0.555
group_5808	0.168	0.0225	0.013	0.986	0.424	0.689	-1.5	-0.0378	-1.07	0.555
group_7044	0.168	0.0225	0.013	0.986	0.424	0.689	-1.5	-0.0378	-1.07	0.555
group_8923	0.168	0.0225	0.013	0.986	0.424	0.689	-1.5	-0.0378	-1.07	0.555
group_13623	0.0286	0.00645	0.0131	-1.9	0.835	0.892	-1.72	0.137	-0.968	0.418
group_28105	0.0286	0.00645	0.0131	-1.9	0.835	0.892	-1.72	0.137	-0.968	0.418
ycjY	0.0286	0.00645	0.0131	-1.9	0.835	0.892	-1.72	0.137	-0.968	0.418
group_9310	0.05	0.00587	0.0133	-1.42	0.587	0.913	-1.73	0.166	-0.952	0.374
group_2468	0.15	0.0314	0.0134	-0.981	0.397	0.997	-1.28	0.224	-1.24	0.579
group_2840	0.121	0.0278	0.0135	1.22	0.548	0.72	-1.83	0.153	-1.06	0.242
fimD_1	0.0464	0.0151	0.0138	-1.45	0.597	0.914	-1.77	0.165	-1.05	0.458
group_18053	0.132	0.0132	0.0139	1.32	0.573	0.688	-1.5	0.337	-0.94	-0.0117
group_18054	0.132	0.0132	0.0139	1.32	0.573	0.688	-1.5	0.337	-0.94	-0.0117
yxbC	0.132	0.0132	0.0139	1.32	0.573	0.688	-1.5	0.337	-0.94	-0.0117
group_18056	0.132	0.0132	0.0139	1.32	0.573	0.688	-1.5	0.337	-0.94	-0.0117
group_13581	0.596	0.0328	0.0139	-0.796	0.327	1.33	-1.8	-0.269	-0.972	0.472
group_8880	0.596	0.0328	0.0139	-0.796	0.327	1.33	-1.8	-0.269	-0.972	0.472
group_15641	0.596	0.0378	0.0142	0.751	0.308	0.397	-1.22	0.278	-1.14	0.711
fliS_2	0.596	0.0378	0.0142	0.751	0.308	0.397	-1.22	0.278	-1.14	0.711
fliD	0.596	0.0378	0.0142	0.751	0.308	0.397	-1.22	0.278	-1.14	0.711
group_1869	0.0607	0.0107	0.0146	-1.26	0.521	0.919	-1.75	0.0452	-0.997	0.446
group_15047	0.246	0.000608	0.0156	1.09	0.481	0.594	-1.66	-0.0353	-0.273	0.0984
group_2210	0.164	0.0283	0.017	0.951	0.425	0.696	-1.51	-0.0304	-1.07	0.551
rdgC_2	0.0679	0.045	0.017	1.55	0.77	0.757	-1.62	0.0568	-1.17	0.311
group_5564	0.0786	0.0203	0.0172	1.56	0.774	0.744	-1.57	0.207	-0.926	0.502
group_7043	0.164	0.0283	0.0173	0.948	0.425	0.697	-1.51	-0.0295	-1.07	0.549
group_8924	0.164	0.0283	0.0173	0.948	0.425	0.697	-1.51	-0.0295	-1.07	0.549
group_8983	0.0821	0.00591	0.0176	-1.1	0.465	0.933	-1.76	0.185	-0.855	0.396
fabG_12	0.121	0.0109	0.0176	-0.951	0.4	0.959	-1.78	0.0386	-0.815	0.673
group_12077	0.164	0.0283	0.0177	0.945	0.425	0.697	-1.51	-0.0293	-1.06	0.548
group_5802	0.164	0.0283	0.0177	0.945	0.425	0.697	-1.51	-0.0293	-1.06	0.548
group_7041	0.164	0.0283	0.0177	0.945	0.425	0.697	-1.51	-0.0293	-1.06	0.548
group_8920	0.164	0.0283	0.0177	0.945	0.425	0.697	-1.51	-0.0293	-1.06	0.548
group_8921	0.164	0.0283	0.0177	0.945	0.425	0.697	-1.51	-0.0293	-1.06	0.548
group_5649	0.236	0.0224	0.0183	0.813	0.361	0.663	-1.87	0.00718	-0.964	0.317
group_11204	0.107	0.0263	0.0184	1.17	0.558	0.732	-1.57	0.0335	-1.07	0.375
aaeB_2	0.0679	0.045	0.0186	1.55	0.775	0.754	-1.58	0.0864	-1.03	0.671
group_2599	0.0393	0.0173	0.0187	-1.49	0.648	0.901	-1.75	0.0696	-1.05	0.416
group_2209	0.15	0.0287	0.019	0.976	0.447	0.707	-1.52	-0.0276	-1.06	0.515
group_9278	0.104	0.0337	0.0198	1.18	0.566	0.733	-1.55	-0.031	-1.06	0.491
group_9277	0.104	0.0337	0.0199	1.18	0.564	0.733	-1.55	-0.0146	-1.06	0.515
group_32879	0.0964	0.0184	0.0201	1.28	0.63	0.74	-1.56	0.0741	-0.998	0.404
group_7864	0.0429	0.037	0.0203	-1.72	0.76	0.916	-1.74	-0.095	-0.802	0.986
lpxD_2	0.593	0.0464	0.0206	0.708	0.307	0.423	-1.24	0.266	-1.12	0.695
cntA	0.593	0.0464	0.0206	0.708	0.307	0.423	-1.24	0.266	-1.12	0.695
perB	0.593	0.0464	0.0206	0.708	0.307	0.423	-1.24	0.266	-1.12	0.695
group_1267	0.361	0.000869	0.0209	0.792	0.353	0.567	-1.66	-0.0123	-0.517	0.129
group_21757	0.0429	0.037	0.0213	-1.4	0.608	0.907	-1.77	0.0731	-1.14	0.438
group_11049	0.275	0.000563	0.0231	0.898	0.413	0.613	-1.4	-0.071	-0.492	0.185
group_2081	0.189	0.013	0.0233	-0.758	0.332	0.99	-1.82	0.025	-0.963	0.169
group_1751	0.189	0.0138	0.0233	0.957	0.445	0.676	-1.62	0.161	-0.769	0.776
group_4029	0.0964	0.0437	0.0234	-1.03	0.449	0.952	-1.53	0.0145	-1.1	0.769
group_2208	0.161	0.0354	0.0238	0.904	0.425	0.705	-1.52	-0.0215	-1.06	0.543
group_2871	0.161	0.0354	0.0238	0.904	0.425	0.705	-1.52	-0.0215	-1.06	0.543
group_3148	0.161	0.0354	0.0238	0.904	0.425	0.705	-1.52	-0.0215	-1.06	0.543
group_3498	0.161	0.0354	0.0238	0.904	0.425	0.705	-1.52	-0.0215	-1.06	0.543
group_5804	0.161	0.0354	0.0238	0.904	0.425	0.705	-1.52	-0.0215	-1.06	0.543
group_22754	0.0429	0.037	0.0238	-1.37	0.606	0.905	-1.77	0.0704	-1.12	0.439
group_714	0.0321	0.019	0.0239	-1.63	0.748	0.896	-1.55	-0.00593	-1.13	0.348
group_2601	0.161	0.0354	0.024	0.902	0.425	0.705	-1.52	-0.0211	-1.06	0.541
group_5757	0.193	0.0265	0.0242	0.88	0.412	0.683	-1.5	0.225	-0.946	0.644
group_12103	0.175	0.0344	0.0244	0.923	0.435	0.691	-1.51	0.204	-0.95	0.728
group_18864	0.175	0.0344	0.0244	0.923	0.435	0.691	-1.51	0.204	-0.95	0.728
group_7058	0.175	0.0344	0.0244	0.923	0.435	0.691	-1.51	0.204	-0.95	0.728
group_8948	0.175	0.0344	0.0244	0.923	0.435	0.691	-1.51	0.204	-0.95	0.728
group_8949	0.175	0.0344	0.0244	0.923	0.435	0.691	-1.51	0.204	-0.95	0.728
group_2294	0.0429	0.00646	0.0246	-1.41	0.649	0.896	-1.65	0.11	-0.946	0.429
group_2739	0.336	0.000844	0.0247	0.844	0.389	0.569	-1.56	-0.121	-0.428	0.183
frmR	0.146	0.0138	0.0247	0.997	0.48	0.711	-1.51	0.166	-0.896	0.508
phzA1	0.6	0.0013	0.0255	0.658	0.294	0.455	-1.25	-0.0326	-0.9	0.105
algA_2	0.932	0.00888	0.0256	1.12	0.504	-0.201	-1.64	0.0111	-1	0.239
group_19561	0.0321	0.019	0.0257	-1.58	0.734	0.89	-1.72	0.000365	-1.03	0.368
group_7102	0.143	0.0451	0.0258	0.937	0.449	0.716	-1.53	-0.0121	-1.08	0.553
group_2737	0.175	0.0344	0.026	0.912	0.435	0.692	-1.51	0.2	-0.944	0.722
group_7064	0.175	0.0344	0.026	0.912	0.435	0.692	-1.51	0.2	-0.944	0.722
group_9401	0.146	0.0361	0.026	0.93	0.447	0.715	-1.52	-0.00668	-1.05	0.542
group_5933	0.95	0.000815	0.0268	2.14	1.09	-1.19	0.416	0.1	-1.03	0.417
group_12521	0.0857	0.0398	0.0274	1.29	0.66	0.746	-1.58	0.172	-0.965	0.638
wapA	0.364	0.0017	0.0288	0.687	0.321	0.607	-1.55	0.0497	-0.743	0.18
group_11781	0.264	0.0192	0.0291	0.701	0.332	0.663	-1.48	0.00483	-1.04	0.349
group_4396	0.225	0.0469	0.0294	-0.715	0.327	1.01	-1.84	0.00873	-0.9	0.72
group_543	0.107	0.0053	0.0295	-1.08	0.492	0.959	-0.699	0.137	-1.13	0.524
lgrB	0.0321	0.00209	0.0298	-2.11	1.06	0.908	-0.369	0.0882	-1.16	0.394
group_1353	0.693	0.0205	0.03	0.642	0.295	0.4	-1.89	0.12	-0.792	0.531
eta	0.961	0.00232	0.0307	1.96	0.95	-1.04	-0.243	0.066	-1.17	0.464
group_18870	0.171	0.0427	0.0313	0.887	0.436	0.698	-1.52	0.192	-0.954	0.722
group_18871	0.171	0.0427	0.0313	0.887	0.436	0.698	-1.52	0.192	-0.954	0.722
group_5826	0.171	0.0427	0.0313	0.887	0.436	0.698	-1.52	0.192	-0.954	0.722
group_7065	0.171	0.0427	0.0313	0.887	0.436	0.698	-1.52	0.192	-0.954	0.722
group_8953	0.171	0.0427	0.0313	0.887	0.436	0.698	-1.52	0.192	-0.954	0.722
group_8954	0.171	0.0427	0.0313	0.887	0.436	0.698	-1.52	0.192	-0.954	0.722
group_2037	0.25	0.0208	0.0316	0.794	0.386	0.657	-2.04	-0.00896	-0.724	0.395
group_1191	0.425	0.000701	0.0317	0.705	0.335	0.548	-1.51	-0.0291	-0.511	0.232
group_3011	0.425	0.000701	0.0317	0.705	0.335	0.548	-1.51	-0.0291	-0.511	0.232
group_12212	0.0679	0.0354	0.0319	-1.08	0.499	0.917	-1.76	-0.0206	-1.07	0.326
group_2741	0.171	0.0427	0.0323	0.884	0.437	0.698	-1.52	0.203	-0.949	0.711
group_16237	0.104	0.0345	0.0325	-0.941	0.437	0.945	-1.56	-0.0773	-1.15	0.285
group_1636	0.239	0.00761	0.0326	0.869	0.427	0.648	-2	-0.0155	-0.611	0.169
group_23148	0.0821	0.0225	0.0336	-0.973	0.455	0.925	-1.75	0.177	-0.979	0.392
prs	0.764	0.0224	0.0357	-0.733	0.361	1.41	-1.49	-0.0251	-0.941	0.623
group_15349	0.0536	0.0128	0.0362	-1.19	0.573	0.901	-1.65	0.00271	-1.02	0.258
group_3625	0.336	0.00525	0.0366	0.678	0.333	0.623	-1.78	-0.00232	-0.712	0.253
cmpR_5	0.257	0.00218	0.0375	0.832	0.415	0.641	-1.67	0.0286	-0.606	0.0388
group_4065	0.2	0.0388	0.0385	0.781	0.395	0.692	-1.51	0.203	-0.96	0.618
group_15449	0.164	0.0283	0.0388	0.81	0.416	0.715	-1.55	0.0521	-1	0.388
group_15451	0.164	0.0283	0.0388	0.81	0.416	0.715	-1.55	0.0521	-1	0.388
group_5879	0.1	0.0431	0.039	1.05	0.56	0.747	-1.57	0.087	-1.06	0.369
wcaJ	0.943	0.025	0.0396	1.14	0.554	-0.232	-1.63	-0.00265	-1.07	0.239
group_33161	0.196	0.0247	0.0397	-0.665	0.32	0.98	-1.48	0.0493	-1.05	0.527
dmlR_5	0.218	0.0296	0.0403	0.759	0.386	0.683	-1.49	0.202	-0.911	0.622
fdm	0.218	0.0296	0.0403	0.759	0.386	0.683	-1.49	0.202	-0.911	0.622
group_4831	0.218	0.0296	0.0403	0.759	0.386	0.683	-1.49	0.202	-0.911	0.622
rarA_1	0.218	0.0296	0.0403	0.759	0.386	0.683	-1.49	0.202	-0.911	0.622
group_8955	0.218	0.0296	0.0403	0.759	0.386	0.683	-1.49	0.202	-0.911	0.622
group_8956	0.218	0.0296	0.0403	0.759	0.386	0.683	-1.49	0.202	-0.911	0.622
group_8957	0.218	0.0296	0.0403	0.759	0.386	0.683	-1.49	0.202	-0.911	0.622
nasA_2	0.0786	0.0457	0.0413	-0.984	0.479	0.919	-1.74	-0.0273	-0.961	0.627
yadV_6	0.164	0.0194	0.0415	-0.741	0.362	0.966	-1.79	0.214	-0.854	0.383
group_8822	0.104	0.00297	0.0416	1.58	0.867	0.714	-1.51	-0.0928	-0.43	0.271
group_1470	0.164	0.00385	0.0416	0.946	0.496	0.706	-1.52	-0.045	-0.724	0.335
group_11052	0.304	0.00135	0.0417	0.804	0.409	0.606	-1.6	-0.0745	-0.445	0.19
group_5658	0.261	0.0494	0.0418	0.658	0.334	0.675	-1.8	0.0562	-0.996	0.296
group_10288	0.0429	0.00646	0.0419	-1.43	0.714	0.905	-0.948	0.0939	-1.09	0.58
group_1828	0.136	0.00669	0.042	-0.877	0.426	0.963	-0.887	-0.00268	-1.06	0.599
group_3554	0.0357	0.0441	0.0423	-1.35	0.671	0.889	-1.73	0.0646	-1.07	0.419
group_6876	0.236	0.0477	0.0426	0.691	0.354	0.685	-1.83	0.00727	-0.976	0.322
group_4037	0.0429	0.037	0.043	-1.28	0.634	0.901	-1.43	0.029	-1.11	0.596
group_11119	0.379	0.0174	0.0431	0.69	0.343	0.587	-1.41	-0.245	-0.91	0.429
group_9024	0.139	0.0225	0.0433	0.883	0.47	0.728	-1.53	0.0585	-0.972	0.341
group_17760	0.332	0.00111	0.0435	0.714	0.363	0.614	-1.5	0.00684	-0.573	0.176
group_4125	0.204	0.0314	0.0437	0.758	0.392	0.694	-1.5	0.183	-0.92	0.603
group_2555	0.407	0.0011	0.0449	0.702	0.357	0.56	-1.52	-0.0731	-0.518	0.113
group_3315	0.407	0.0011	0.0449	0.702	0.357	0.56	-1.52	-0.0731	-0.518	0.113
group_2883	0.154	0.0227	0.047	0.822	0.441	0.724	-1.53	0.0566	-0.972	0.347
uvrA_1	0.214	0.0366	0.0478	0.734	0.386	0.69	-1.5	0.194	-0.921	0.623
group_4005	0.279	0.0371	0.048	0.628	0.327	0.672	-1.79	0.0445	-0.954	0.306
group_11994	0.0321	0.019	0.0485	-1.39	0.733	0.88	-1.71	0.108	-0.91	0.454
group_11995	0.0321	0.019	0.0485	-1.39	0.733	0.88	-1.71	0.108	-0.91	0.454
group_18394	0.0321	0.019	0.0485	-1.39	0.733	0.88	-1.71	0.108	-0.91	0.454
group_18395	0.0321	0.019	0.0485	-1.39	0.733	0.88	-1.71	0.108	-0.91	0.454
group_3778	0.0571	0.00515	0.0489	-1.12	0.571	0.902	-1.25	0.041	-0.96	0.54
dacC	0.957	0.000777	0.05	1.99	1.15	-1.08	0.0906	0.0646	-0.947	0.397
frmA_1	0.214	0.0366	0.0502	0.728	0.387	0.691	-1.5	0.2	-0.917	0.611
group_15046	0.261	0.00168	0.0507	0.847	0.452	0.631	-1.64	-0.0181	-0.425	0.14
group_3272	0.164	0.011	0.0509	0.848	0.458	0.716	-1.54	-0.0567	-0.847	0.424
group_2760	0.0643	0.0203	0.0511	-1.01	0.516	0.903	-1.66	0.014	-1.02	0.286
group_6692	0.0643	0.0203	0.0511	-1.01	0.516	0.903	-1.66	0.014	-1.02	0.286
group_6931	0.0357	0.0441	0.0512	-1.37	0.705	0.894	-1.4	0.0151	-1.1	0.615
group_11050	0.261	0.00168	0.0514	0.847	0.453	0.63	-1.64	-0.0191	-0.421	0.142
group_11051	0.261	0.00168	0.0514	0.847	0.453	0.63	-1.64	-0.0191	-0.421	0.142
yjlD	0.214	0.0366	0.0519	0.724	0.387	0.691	-1.5	0.2	-0.912	0.609
frmB	0.214	0.0366	0.0519	0.724	0.387	0.691	-1.5	0.2	-0.912	0.609
group_5827	0.214	0.0366	0.0519	0.724	0.387	0.691	-1.5	0.2	-0.912	0.609
group_32991	0.786	0.00323	0.0531	0.651	0.334	0.332	-1.16	0.161	-0.937	0.413
group_15031	0.289	0.00147	0.0532	0.801	0.43	0.618	-1.61	-0.014	-0.427	0.138
group_6618	0.289	0.00147	0.0532	0.801	0.43	0.618	-1.61	-0.014	-0.427	0.138
group_7076	0.179	0.0275	0.0538	0.734	0.4	0.716	-1.52	0.0291	-0.986	0.355
czcC_1	0.179	0.0275	0.0538	0.734	0.4	0.716	-1.52	0.0291	-0.986	0.355
ahpD_1	0.0857	0.0361	0.0538	-0.87	0.447	0.918	-1.74	0.168	-0.979	0.392
group_2665	0.75	0.0306	0.0547	0.595	0.308	0.394	-1.84	0.116	-0.824	0.478
group_24108	0.0357	0.0441	0.0549	-1.38	0.731	0.888	-1.72	-0.083	-1.04	0.197
uvrB_1	0.196	0.0478	0.0549	0.735	0.399	0.702	-1.52	0.201	-0.943	0.606
group_2115	0.404	0.00143	0.0558	0.671	0.358	0.574	-1.53	-0.0725	-0.54	0.133
group_2502	0.404	0.00143	0.0558	0.671	0.358	0.574	-1.53	-0.0725	-0.54	0.133
group_3016	0.404	0.00143	0.0558	0.671	0.358	0.574	-1.53	-0.0725	-0.54	0.133
group_834	0.404	0.00143	0.0558	0.671	0.358	0.574	-1.53	-0.0725	-0.54	0.133
blaI	0.189	0.033	0.0567	0.701	0.385	0.713	-1.61	0.0358	-0.965	0.379
yfeX_2	0.211	0.045	0.0573	0.712	0.389	0.695	-1.51	0.192	-0.922	0.631
group_4944	0.211	0.045	0.0573	0.712	0.389	0.695	-1.51	0.192	-0.922	0.631
group_7224	0.211	0.045	0.0573	0.712	0.389	0.695	-1.51	0.192	-0.922	0.631
topB_2	0.286	0.00191	0.0574	0.757	0.412	0.633	-1.63	0.00626	-0.511	0.141
group_1537	0.0536	0.0128	0.0597	-1.21	0.645	0.908	-1.03	-0.0115	-1.02	0.682
lasR	0.811	0.0313	0.0599	0.617	0.325	0.344	-1.62	0.0942	-0.945	0.524
group_432	0.154	0.0434	0.0599	-0.678	0.357	0.948	-1.52	-0.00275	-1.09	0.368
group_643	0.45	0.00842	0.0617	0.567	0.306	0.591	-1.4	-0.109	-0.922	0.244
group_2614	0.486	0.0329	0.0627	0.527	0.285	0.589	-1.84	-0.0174	-0.868	0.308
group_11749	0.0357	0.0441	0.0628	-1.24	0.673	0.883	-1.71	0.132	-0.995	0.437
group_11750	0.0357	0.0441	0.0628	-1.24	0.673	0.883	-1.71	0.132	-0.995	0.437
group_1546	0.136	0.0286	0.0635	0.82	0.472	0.738	-1.55	0.0945	-0.95	0.406
group_1988	0.211	0.045	0.0635	0.703	0.394	0.698	-1.52	0.201	-0.918	0.626
group_584	0.625	0.0255	0.0644	0.516	0.279	0.52	-1.75	0.0671	-0.839	0.475
group_414	0.1	0.00393	0.0647	1.55	0.917	0.717	-1.52	-0.101	-0.38	0.28
group_5455	0.257	0.0294	0.0654	0.599	0.334	0.687	-1.66	0.0112	-0.917	0.363
prkC_2	0.886	0.00418	0.0663	0.876	0.473	0.0649	-0.857	-0.0227	-0.967	0.596
group_3434	0.125	0.0454	0.0663	-0.729	0.393	0.935	-1.58	-0.0338	-1.08	0.295
group_11047	0.4	0.00187	0.0674	0.637	0.354	0.589	-1.54	-0.0618	-0.575	0.149
group_11048	0.4	0.00187	0.0674	0.637	0.354	0.589	-1.54	-0.0618	-0.575	0.149
group_15042	0.4	0.00187	0.0674	0.637	0.354	0.589	-1.54	-0.0618	-0.575	0.149
group_15043	0.4	0.00187	0.0674	0.637	0.354	0.589	-1.54	-0.0618	-0.575	0.149
group_15044	0.4	0.00187	0.0674	0.637	0.354	0.589	-1.54	-0.0618	-0.575	0.149
group_15045	0.4	0.00187	0.0674	0.637	0.354	0.589	-1.54	-0.0618	-0.575	0.149
group_2733	0.4	0.00187	0.0674	0.637	0.354	0.589	-1.54	-0.0618	-0.575	0.149
recF_2	0.4	0.00187	0.0674	0.637	0.354	0.589	-1.54	-0.0618	-0.575	0.149
group_5450	0.4	0.00187	0.0674	0.637	0.354	0.589	-1.54	-0.0618	-0.575	0.149
group_8324	0.4	0.00187	0.0674	0.637	0.354	0.589	-1.54	-0.0618	-0.575	0.149
group_6142	0.746	0.0394	0.0682	0.563	0.307	0.42	-1.83	0.125	-0.842	0.457
czcA_1	0.221	0.0239	0.0685	0.632	0.359	0.705	-1.5	0.0673	-0.961	0.332
czcB_1	0.221	0.0239	0.0685	0.632	0.359	0.705	-1.5	0.0673	-0.961	0.332
group_6620	0.4	0.00187	0.069	0.637	0.357	0.589	-1.54	-0.0702	-0.562	0.169
group_2562	0.164	0.011	0.0691	0.882	0.51	0.712	-1.84	0.0188	-0.656	0.305
group_18842	0.146	0.0361	0.0691	0.764	0.445	0.736	-1.56	0.0754	-1	0.319
group_7782	0.0429	0.037	0.07	-1.1	0.612	0.885	-1.71	0.0996	-0.938	0.487
group_6771	0.396	0.0122	0.0702	0.54	0.302	0.629	-1.72	-0.00734	-0.798	0.318
group_12144	0.0821	0.0225	0.071	-0.834	0.459	0.906	-1.68	0.128	-0.921	0.416
group_1095	0.15	0.0287	0.0711	0.792	0.462	0.731	-1.65	0.165	-0.88	0.462
group_6683	0.964	0.0441	0.0721	1.19	0.672	-0.314	-1.71	0.048	-0.948	0.517
group_8524	0.0607	0.0444	0.0721	-0.939	0.52	0.897	-1.74	0.144	-0.959	0.427
group_4953	0.104	0.0337	0.0732	0.936	0.568	0.754	-1.57	0.000104	-0.944	0.41
lgrB_1	0.936	0.00441	0.0749	1.26	0.708	-0.338	-0.477	0.0959	-1.09	0.438
ptxB	0.261	0.0044	0.0753	0.7	0.405	0.666	-1.66	0.0322	-0.669	0.0955
ptxD	0.261	0.0044	0.0753	0.7	0.405	0.666	-1.66	0.0322	-0.669	0.0955
glnQ_4	0.261	0.0044	0.0753	0.7	0.405	0.666	-1.66	0.0322	-0.669	0.0955
phnE_4	0.261	0.0044	0.0753	0.7	0.405	0.666	-1.66	0.0322	-0.669	0.0955
group_8407	0.0857	0.0361	0.0754	-0.812	0.453	0.908	-1.68	-0.0184	-1	0.35
group_1049	0.55	0.0216	0.0755	0.509	0.287	0.561	-1.7	-0.0607	-0.878	0.282
group_5507	0.0393	0.0173	0.076	-1.16	0.665	0.88	-1.62	0.122	-0.942	0.391
group_15563	0.121	0.0316	0.0777	-0.712	0.401	0.926	-1.75	0.176	-0.868	0.403
group_4812	0.0607	0.0444	0.0791	-0.918	0.52	0.894	-1.73	0.135	-0.962	0.387
group_2577	0.114	0.0448	0.0792	0.846	0.517	0.752	-1.57	0.00802	-0.999	0.386
group_1494	0.0357	0.0441	0.0793	-1.17	0.674	0.879	-1.73	0.132	-0.962	0.405
group_5551	0.368	0.0159	0.0803	0.568	0.331	0.635	-1.87	-0.00697	-0.712	0.286
group_4020	0.464	0.00602	0.0824	-0.731	0.431	1.19	-1.25	0.436	-0.596	0.228
group_1936	0.943	0.00515	0.0825	1.46	0.84	-0.542	-0.251	0.00543	-1.02	0.643
tcpT	0.343	0.0163	0.0835	0.557	0.328	0.654	-1.82	0.0158	-0.754	0.304
group_501	0.0679	0.045	0.0836	1.17	0.769	0.775	-1.6	0.0556	-0.97	0.373
group_3379	0.682	0.00954	0.084	0.515	0.298	0.487	-1.61	0.0967	-0.761	0.472
group_15529	0.0679	0.0354	0.0842	-0.86	0.496	0.896	-1.72	0.124	-0.912	0.412
group_8781	0.175	0.00518	0.0852	0.828	0.502	0.708	-1.51	0.0368	-0.6	0.508
group_1864	0.0607	0.00199	0.0876	-1.29	0.768	0.915	-0.405	0.00846	-1.02	0.313
group_6510	0.0571	0.00515	0.0879	-1.2	0.698	0.909	-0.667	0.0723	-1.11	0.343
pilT_1	0.357	0.0145	0.0893	0.548	0.328	0.648	-1.8	0.0017	-0.732	0.3
group_6772	0.211	0.045	0.09	0.589	0.359	0.719	-1.54	0.0678	-0.974	0.465
group_14527	0.964	0.00675	0.0907	1.68	1.01	-0.784	-0.421	0.0569	-1.15	0.449
group_9178	0.132	0.00426	0.093	1.05	0.668	0.719	-1.52	-0.058	-0.533	0.293
group_1741	0.129	0.0454	0.0933	0.755	0.477	0.749	-1.57	0.0172	-0.981	0.376
hss	0.379	0.0036	0.0943	0.571	0.348	0.626	-1.64	0.014	-0.625	0.201
group_11858	0.379	0.0036	0.0943	0.571	0.348	0.626	-1.64	0.014	-0.625	0.201
group_17762	0.379	0.0036	0.0943	0.571	0.348	0.626	-1.64	0.014	-0.625	0.201
group_17763	0.379	0.0036	0.0943	0.571	0.348	0.626	-1.64	0.014	-0.625	0.201
group_17764	0.379	0.0036	0.0943	0.571	0.348	0.626	-1.64	0.014	-0.625	0.201
xerC_2	0.379	0.0036	0.0943	0.571	0.348	0.626	-1.64	0.014	-0.625	0.201
fhuA_4	0.946	0.0128	0.0974	0.977	0.59	-0.0879	-1.29	0.0554	-0.966	0.548
group_977	0.364	0.0197	0.0977	0.538	0.331	0.647	-1.86	0.000216	-0.729	0.297
group_12063	0.1	0.0431	0.099	0.988	0.634	0.751	-1.71	0.154	-0.782	0.633
group_18659	0.1	0.0431	0.099	0.988	0.634	0.751	-1.71	0.154	-0.782	0.633
group_18660	0.1	0.0431	0.099	0.988	0.634	0.751	-1.71	0.154	-0.782	0.633
group_18662	0.1	0.0431	0.099	0.988	0.634	0.751	-1.71	0.154	-0.782	0.633
group_18663	0.1	0.0431	0.099	0.988	0.634	0.751	-1.71	0.154	-0.782	0.633
group_18664	0.1	0.0431	0.099	0.988	0.634	0.751	-1.71	0.154	-0.782	0.633
group_18665	0.1	0.0431	0.099	0.988	0.634	0.751	-1.71	0.154	-0.782	0.633
group_21711	0.1	0.0431	0.099	0.988	0.634	0.751	-1.71	0.154	-0.782	0.633
group_7038	0.1	0.0431	0.099	0.988	0.634	0.751	-1.71	0.154	-0.782	0.633
group_8908	0.1	0.0431	0.099	0.988	0.634	0.751	-1.71	0.154	-0.782	0.633
merT_2	0.157	0.00649	0.0998	0.848	0.539	0.72	-1.53	0.0301	-0.608	0.512
chrC	0.114	0.00483	0.104	1.2	0.789	0.723	-1.52	-0.08	-0.477	0.261
chrA	0.114	0.00483	0.104	1.2	0.789	0.723	-1.52	-0.08	-0.477	0.261
chrB1	0.114	0.00483	0.104	1.2	0.789	0.723	-1.52	-0.08	-0.477	0.261
lgrD_2	0.871	0.00857	0.104	0.696	0.422	0.233	-1.06	0.124	-1.03	0.422
tcpE	0.693	0.0416	0.104	0.497	0.306	0.495	-1.83	-0.0318	-0.849	0.268
group_3978	0.0964	0.0437	0.104	-0.752	0.459	0.913	-1.41	-0.0282	-1.02	0.586
relE	0.111	0.00634	0.106	1.12	0.745	0.735	-1.55	-0.067	-0.581	0.302
yafN	0.111	0.00634	0.106	1.12	0.745	0.735	-1.55	-0.067	-0.581	0.302
hcpA_1	0.318	0.0416	0.107	-0.511	0.317	1	-1.83	0.203	-0.821	0.298
group_17640	0.129	0.0454	0.107	0.727	0.477	0.752	-1.57	0.0248	-0.967	0.364
group_18894	0.111	0.00634	0.108	1.14	0.761	0.732	-1.54	-0.0836	-0.552	0.307
group_12553	0.0929	0.00684	0.11	1.32	0.894	0.741	-1.54	-0.0633	-0.531	0.302
group_3149	0.139	0.00794	0.11	0.881	0.581	0.73	-1.54	-0.0742	-0.677	0.341
group_3837	0.325	0.0449	0.111	0.479	0.305	0.681	-1.62	0.0296	-0.953	0.278
group_5444	0.325	0.0449	0.111	0.479	0.305	0.681	-1.62	0.0296	-0.953	0.278
group_6616	0.325	0.0449	0.111	0.479	0.305	0.681	-1.62	0.0296	-0.953	0.278
group_6617	0.325	0.0449	0.111	0.479	0.305	0.681	-1.62	0.0296	-0.953	0.278
group_8318	0.325	0.0449	0.111	0.479	0.305	0.681	-1.62	0.0296	-0.953	0.278
group_8320	0.325	0.0449	0.111	0.479	0.305	0.681	-1.62	0.0296	-0.953	0.278
group_2677	0.746	0.0394	0.113	0.48	0.301	0.48	-1.69	0.102	-0.888	0.418
group_6024	0.0464	0.00233	0.115	-1.7	1.17	0.912	0.0231	0.073	-0.985	0.411
group_10644	0.468	0.0318	0.115	-0.487	0.311	1.07	-1.64	0.128	-0.749	0.633
group_10646	0.468	0.0318	0.115	-0.487	0.311	1.07	-1.64	0.128	-0.749	0.633
group_14720	0.468	0.0318	0.115	-0.487	0.311	1.07	-1.64	0.128	-0.749	0.633
group_14721	0.468	0.0318	0.115	-0.487	0.311	1.07	-1.64	0.128	-0.749	0.633
group_23833	0.404	0.00779	0.116	0.757	0.493	0.54	-1.33	0.342	-0.369	0.608
group_6706	0.404	0.00779	0.116	0.757	0.493	0.54	-1.33	0.342	-0.369	0.608
group_5742	0.132	0.0361	0.116	0.742	0.496	0.749	-1.66	0.0586	-0.848	0.526
group_9993	0.614	0.0483	0.117	0.441	0.281	0.569	-1.74	0.0575	-0.85	0.499
epsG	0.818	0.0167	0.118	0.58	0.368	0.366	-1.18	0.000682	-0.993	0.568
group_3649	0.818	0.0167	0.118	0.58	0.368	0.366	-1.18	0.000682	-0.993	0.568
group_4297	0.818	0.0167	0.118	0.58	0.368	0.366	-1.18	0.000682	-0.993	0.568
group_5111	0.818	0.0167	0.118	0.58	0.368	0.366	-1.18	0.000682	-0.993	0.568
group_7645	0.818	0.0167	0.118	0.58	0.368	0.366	-1.18	0.000682	-0.993	0.568
fimA	0.818	0.0167	0.118	0.58	0.368	0.366	-1.18	0.000682	-0.993	0.568
group_9999	0.818	0.0167	0.118	0.58	0.368	0.366	-1.18	0.000682	-0.993	0.568
nepI_2	0.143	0.0398	0.119	-0.627	0.4	0.931	-1.43	0.0584	-0.886	0.693
dnaG_2	0.0679	0.045	0.119	1.08	0.775	0.779	-1.6	0.0928	-0.924	0.369
group_15180	0.571	0.00518	0.12	0.503	0.325	0.553	-1.35	0.134	-0.688	0.58
ybiI_2	0.95	0.0306	0.123	0.93	0.601	-0.0412	-1.25	0.115	-1.05	0.488
yycB_3	0.943	0.00515	0.125	1.2	0.778	-0.289	-0.523	0.0535	-1.06	0.447
group_2132	0.0679	0.0354	0.129	-0.815	0.53	0.897	-1.26	0.0682	-1.07	0.537
group_10264	0.114	0.0401	0.129	-0.634	0.413	0.914	-1.47	0.172	-1.03	0.373
oprJ_2	0.454	0.0141	0.133	0.458	0.307	0.634	-1.44	-0.0723	-0.908	0.268
phzB1	0.454	0.0141	0.134	0.429	0.288	0.647	-1.46	0.0148	-0.933	0.275
group_4286	0.421	0.0235	0.134	0.448	0.301	0.652	-1.7	-0.0102	-0.846	0.272
group_12116	0.125	0.00727	0.135	0.951	0.672	0.734	-1.54	-0.0705	-0.611	0.303
lspA_1	0.339	0.00412	0.139	0.553	0.381	0.654	-1.6	0.0131	-0.626	0.163
group_20485	0.0929	0.0238	0.139	1.1	0.78	0.756	-1.84	-0.00901	-0.664	0.306
group_11039	0.339	0.00412	0.14	0.552	0.381	0.654	-1.6	0.0207	-0.627	0.16
group_6995	0.0607	0.0444	0.142	-0.778	0.526	0.882	-1.66	0.101	-0.938	0.462
group_27941	0.746	0.00797	0.145	0.491	0.335	0.472	-1.26	0.0487	-0.835	0.584
group_1639	0.704	0.0415	0.146	0.428	0.293	0.536	-1.67	0.0943	-0.874	0.459
barA_6	0.943	0.00515	0.147	1.12	0.774	-0.221	-0.584	0.0643	-1.03	0.466
group_4021	0.539	0.0102	0.148	0.57	0.4	0.536	-1.33	0.343	-0.711	0.289
fabG_6	0.907	0.0285	0.148	0.812	0.556	0.102	-1.09	-0.021	-0.955	0.735
group_4735	0.232	0.0374	0.148	-0.603	0.415	0.979	-1.19	-0.184	-1.04	0.27
group_3342	0.95	0.00587	0.151	1.34	0.945	-0.439	-0.363	0.0931	-1.06	0.435
group_39	0.0357	0.0441	0.153	-0.971	0.684	0.868	-1.63	0.063	-0.984	0.342
yiiM_1	0.882	0.00689	0.154	0.636	0.441	0.277	-1.1	0.0444	-1.01	0.32
group_12117	0.107	0.00831	0.16	1.05	0.79	0.742	-1.55	-0.0729	-0.566	0.318
group_18893	0.107	0.00831	0.16	1.05	0.79	0.742	-1.55	-0.0729	-0.566	0.318
group_18895	0.107	0.00831	0.16	1.05	0.79	0.742	-1.55	-0.0729	-0.566	0.318
group_18896	0.107	0.00831	0.16	1.05	0.79	0.742	-1.55	-0.0729	-0.566	0.318
group_11041	0.336	0.00525	0.169	0.515	0.381	0.667	-1.6	0.0198	-0.655	0.182
zntR_1	0.336	0.00525	0.169	0.515	0.381	0.667	-1.6	0.0198	-0.655	0.182
group_15028	0.336	0.00525	0.169	0.515	0.381	0.667	-1.6	0.0198	-0.655	0.182
group_15029	0.336	0.00525	0.169	0.515	0.381	0.667	-1.6	0.0198	-0.655	0.182
yofA_4	0.95	0.00587	0.171	1.25	0.918	-0.347	-0.459	0.0729	-1.05	0.427
guaD_3	0.95	0.00587	0.171	1.25	0.918	-0.347	-0.459	0.0729	-1.05	0.427
group_8244	0.95	0.00587	0.171	1.25	0.918	-0.347	-0.459	0.0729	-1.05	0.427
group_9046	0.186	0.0175	0.172	0.619	0.463	0.733	-1.69	0.0763	-0.773	0.214
aprA_1	0.939	0.0107	0.174	1.02	0.743	-0.123	-0.697	0.0872	-1.08	0.433
yvoA_2	0.939	0.0107	0.174	1.02	0.743	-0.123	-0.697	0.0872	-1.08	0.433
aprB	0.939	0.0107	0.174	1.02	0.743	-0.123	-0.697	0.0872	-1.08	0.433
group_2705	0.939	0.0107	0.174	1.02	0.743	-0.123	-0.697	0.0872	-1.08	0.433
catC	0.957	0.00646	0.175	1.61	1.22	-0.703	-0.0888	0.0541	-1.07	0.43
antC	0.957	0.00646	0.175	1.61	1.22	-0.703	-0.0888	0.0541	-1.07	0.43
group_6567	0.957	0.00646	0.175	1.61	1.22	-0.703	-0.0888	0.0541	-1.07	0.43
rhaS_1	0.957	0.00646	0.175	1.61	1.22	-0.703	-0.0888	0.0541	-1.07	0.43
group_4533	0.575	0.0184	0.175	0.399	0.295	0.61	-1.43	0.0317	-0.854	0.562
group_741	0.904	0.0141	0.177	0.695	0.507	0.21	-1.03	0.112	-1.04	0.458
group_9006	0.121	0.00945	0.18	0.853	0.668	0.747	-1.56	-0.0398	-0.66	0.313
group_1258	0.0321	0.019	0.181	-1.04	0.789	0.869	-1.25	0.0878	-1.02	0.449
imm2	0.361	0.0242	0.184	0.439	0.333	0.681	-1.49	-0.0865	-0.879	0.354
group_2745	0.05	0.0306	0.184	-0.782	0.588	0.871	-1.6	0.0897	-0.948	0.403
paaF_1	0.95	0.00587	0.189	1.23	0.952	-0.336	-0.469	0.107	-1.04	0.383
group_12187	0.25	0.0208	0.19	0.589	0.457	0.697	-1.51	0.154	-0.659	0.667
group_19472	0.25	0.0208	0.19	0.589	0.457	0.697	-1.51	0.154	-0.659	0.667
group_19473	0.25	0.0208	0.19	0.589	0.457	0.697	-1.51	0.154	-0.659	0.667
group_19474	0.25	0.0208	0.19	0.589	0.457	0.697	-1.51	0.154	-0.659	0.667
hin_2	0.25	0.0208	0.19	0.589	0.457	0.697	-1.51	0.154	-0.659	0.667
group_4742	0.25	0.0208	0.19	0.589	0.457	0.697	-1.51	0.154	-0.659	0.667
group_11038	0.332	0.00666	0.196	0.482	0.378	0.679	-1.61	0.0322	-0.688	0.194
group_8290	0.221	0.00659	0.2	-0.467	0.363	0.94	-1.27	0.173	-0.856	0.386
group_6007	0.943	0.00515	0.201	0.982	0.77	-0.0907	-0.722	0.0826	-0.997	0.439
group_4832	0.146	0.0138	0.201	0.668	0.542	0.748	-1.57	-0.0381	-0.754	0.345
pilY1	0.771	0.0287	0.202	0.449	0.35	0.491	-1.29	0.00602	-0.941	0.591
group_15026	0.332	0.00666	0.203	0.477	0.381	0.681	-1.61	0.0261	-0.684	0.199
tauB_2	0.929	0.0164	0.204	0.819	0.635	0.0757	-0.91	0.0867	-1.07	0.421
hsdR_1	0.107	0.00831	0.207	1.03	0.85	0.742	-1.55	-0.0652	-0.524	0.3
clpB_1	0.586	0.00905	0.21	0.367	0.293	0.623	-1.44	0.0232	-0.873	0.293
group_12551	0.104	0.0109	0.21	0.926	0.777	0.755	-1.57	-0.0385	-0.642	0.311
group_8325	0.318	0.00742	0.217	0.471	0.387	0.689	-1.62	0.0306	-0.691	0.211
group_6146	0.414	0.00905	0.218	-0.363	0.294	0.988	-1.44	0.0242	-0.872	0.285
group_10384	0.846	0.0434	0.221	0.501	0.404	0.411	-1.23	0.124	-1.03	0.459
group_14276	0.943	0.00515	0.226	0.927	0.767	-0.0392	-0.777	0.0754	-1	0.385
group_8900	0.218	0.0296	0.226	0.53	0.446	0.728	-1.8	0.07	-0.757	0.208
ltrA_2	0.404	0.0328	0.226	0.388	0.324	0.682	-1.78	0.0874	-0.771	0.338
group_14225	0.811	0.0313	0.228	0.443	0.365	0.478	-1.29	0.0186	-0.979	0.535
group_15025	0.329	0.0084	0.234	0.444	0.378	0.692	-1.62	0.0315	-0.715	0.216
group_425	0.0857	0.0118	0.235	1.1	0.963	0.759	-1.56	-0.0469	-0.579	0.319
group_2180	0.182	0.022	0.236	0.518	0.447	0.747	-1.62	0.0333	-0.777	0.412
cirA_4	0.104	0.0109	0.238	0.919	0.812	0.755	-1.56	-0.0445	-0.612	0.321
group_3472	0.196	0.0212	0.239	0.525	0.455	0.739	-1.56	0.0805	-0.745	0.55
group_2291	0.0357	0.0441	0.239	-0.928	0.783	0.872	-1.18	0.0893	-1.08	0.486
group_6227	0.95	0.00587	0.246	1.07	0.93	-0.181	-0.615	0.0607	-1	0.431
group_6008	0.05	0.00587	0.246	-1.05	0.916	0.887	-0.643	0.0859	-1	0.43
group_12115	0.143	0.0177	0.248	0.615	0.549	0.756	-1.58	-0.0344	-0.775	0.357
group_4833	0.143	0.0177	0.248	0.615	0.549	0.756	-1.58	-0.0344	-0.775	0.357
group_5830	0.143	0.0177	0.248	0.615	0.549	0.756	-1.58	-0.0344	-0.775	0.357
aaeA_3	0.957	0.00646	0.249	1.34	1.19	-0.444	-0.358	0.0949	-1.03	0.403
group_10339	0.957	0.00646	0.249	1.34	1.19	-0.444	-0.358	0.0949	-1.03	0.403
hflK_2	0.957	0.00646	0.249	1.34	1.19	-0.444	-0.358	0.0949	-1.03	0.403
group_14487	0.957	0.00646	0.249	1.34	1.19	-0.444	-0.358	0.0949	-1.03	0.403
group_14489	0.957	0.00646	0.249	1.34	1.19	-0.444	-0.358	0.0949	-1.03	0.403
group_14490	0.957	0.00646	0.249	1.34	1.19	-0.444	-0.358	0.0949	-1.03	0.403
lgrE_1	0.957	0.00646	0.249	1.34	1.19	-0.444	-0.358	0.0949	-1.03	0.403
group_5201	0.957	0.00646	0.249	1.34	1.19	-0.444	-0.358	0.0949	-1.03	0.403
aaeX_3	0.957	0.00646	0.249	1.34	1.19	-0.444	-0.358	0.0949	-1.03	0.403
group_6278	0.957	0.00646	0.249	1.34	1.19	-0.444	-0.358	0.0949	-1.03	0.403
group_6279	0.957	0.00646	0.249	1.34	1.19	-0.444	-0.358	0.0949	-1.03	0.403
dmlR_17	0.957	0.00646	0.249	1.34	1.19	-0.444	-0.358	0.0949	-1.03	0.403
group_5452	0.325	0.0106	0.254	0.424	0.377	0.7	-1.61	-0.00973	-0.728	0.274
group_5903	0.104	0.0337	0.254	0.683	0.623	0.775	-1.59	0.0794	-0.808	0.5
group_3591	0.364	0.039	0.254	0.363	0.321	0.703	-1.67	-0.0248	-0.852	0.359
group_6005	0.957	0.00646	0.255	1.32	1.2	-0.432	-0.366	0.0752	-1.02	0.425
group_7468	0.957	0.00646	0.255	1.32	1.2	-0.432	-0.366	0.0752	-1.02	0.425
group_9721	0.957	0.00646	0.255	1.32	1.2	-0.432	-0.366	0.0752	-1.02	0.425
qorA_3	0.518	0.04	0.255	-0.342	0.301	1.02	-1.49	-0.0396	-0.968	0.311
group_3154	0.939	0.0107	0.256	0.826	0.718	0.0598	-0.884	0.0654	-1.04	0.419
group_17765	0.161	0.0354	0.261	0.494	0.452	0.761	-1.64	0.0424	-0.853	0.364
group_7388	0.875	0.0454	0.263	0.563	0.498	0.344	-1.16	-0.0164	-1.11	0.256
group_1189	0.0536	0.0128	0.266	-0.98	0.87	0.888	-0.714	0.0273	-1.08	0.362
group_9179	0.1	0.0141	0.268	0.832	0.782	0.765	-1.58	-0.0177	-0.668	0.37
group_17805	0.104	0.0109	0.272	0.928	0.873	0.753	-1.56	-0.0575	-0.572	0.319
group_17806	0.104	0.0109	0.272	0.928	0.873	0.753	-1.56	-0.0575	-0.572	0.319
group_17807	0.104	0.0109	0.272	0.928	0.873	0.753	-1.56	-0.0575	-0.572	0.319
group_8820	0.104	0.0109	0.272	0.928	0.873	0.753	-1.56	-0.0575	-0.572	0.319
group_1949	0.368	0.0159	0.272	0.349	0.321	0.711	-1.53	0.00953	-0.872	0.302
group_7073	0.129	0.017	0.274	0.65	0.613	0.761	-1.58	-0.0363	-0.746	0.362
group_7895	0.918	0.0225	0.275	0.641	0.578	0.247	-1.06	0.0977	-1.04	0.463
azoR1_1	0.957	0.00646	0.276	1.28	1.21	-0.392	-0.405	0.0686	-1.03	0.362
lhpI	0.946	0.0128	0.277	0.929	0.841	-0.0433	-0.771	0.0234	-1.04	0.473
group_5485	0.818	0.0395	0.277	0.4	0.364	0.511	-1.34	0.13	-1.02	0.437
soj_4	0.525	0.0472	0.278	0.302	0.279	0.679	-1.59	0.0499	-0.923	0.334
group_3798	0.968	0.019	0.283	1.18	1.09	-0.308	-0.78	0.0715	-1.12	0.375
group_19973	0.125	0.0218	0.283	0.585	0.564	0.77	-1.58	0.0245	-0.813	0.352
group_9174	0.104	0.0109	0.284	0.877	0.85	0.758	-1.57	-0.0184	-0.592	0.352
group_29537	0.532	0.0318	0.285	0.498	0.475	0.577	-1.4	0.357	-0.775	0.289
group_16543	0.0357	0.00675	0.291	-1.26	1.23	0.877	-0.593	0.0889	-1	0.448
pchR_1	0.946	0.0128	0.293	0.886	0.83	-0.00222	-0.813	0.0652	-1.05	0.436
group_20648	0.1	0.0141	0.294	0.83	0.819	0.764	-1.57	-0.0377	-0.658	0.352
group_3606	0.754	0.0493	0.297	0.4	0.383	0.533	-1.34	-0.0175	-0.899	0.642
group_5255	0.0429	0.00646	0.301	-1.25	1.25	0.887	-0.415	0.085	-1.01	0.42
group_8903	0.1	0.0431	0.302	0.709	0.704	0.776	-1.76	0.0246	-0.771	0.324
group_9259	0.1	0.0431	0.302	0.625	0.627	0.781	-1.6	0.0763	-0.831	0.502
group_421	0.171	0.00669	0.315	0.583	0.594	0.743	-1.54	0.0314	-0.648	0.275
group_2274	0.939	0.0107	0.319	0.721	0.716	0.158	-0.978	0.0796	-1.02	0.422
group_11872	0.1	0.0141	0.332	0.807	0.856	0.765	-1.57	-0.0371	-0.649	0.338
group_2328	0.0464	0.0151	0.334	-1.03	1.05	0.882	-0.669	0.0841	-1.07	0.408
group_6596	0.0964	0.0184	0.336	0.731	0.786	0.775	-1.59	-0.0142	-0.728	0.35
group_5456	0.118	0.0123	0.338	0.684	0.737	0.764	-1.57	-0.0108	-0.679	0.325
bicA_3	0.1	0.0141	0.338	0.753	0.816	0.771	-1.58	-0.00389	-0.69	0.33
hxuA_2	0.457	0.023	0.338	0.446	0.469	0.635	-1.44	0.291	-0.709	0.375
slrP	0.936	0.0203	0.339	0.671	0.69	0.208	-1.03	0.0494	-1.05	0.427
group_6508	0.05	0.0306	0.346	-0.763	0.792	0.875	-1.02	0.0908	-1.08	0.439
group_2485	0.971	0.00645	0.347	1.26	1.39	-0.4	-0.736	0.0647	-1	0.396
group_545	0.189	0.0138	0.347	0.439	0.475	0.757	-1.57	0.0321	-0.801	0.288
merR_2	0.175	0.0344	0.355	0.44	0.483	0.763	-1.58	0.078	-0.8	0.531
group_3308	0.936	0.0203	0.365	0.647	0.704	0.229	-1.04	0.0838	-1.04	0.435
group_12548	0.118	0.0123	0.369	0.655	0.75	0.766	-1.57	0.000245	-0.684	0.329
group_12549	0.118	0.0123	0.369	0.655	0.75	0.766	-1.57	0.000245	-0.684	0.329
group_20641	0.118	0.0123	0.369	0.655	0.75	0.766	-1.57	0.000245	-0.684	0.329
group_20644	0.118	0.0123	0.369	0.655	0.75	0.766	-1.57	0.000245	-0.684	0.329
group_8252	0.954	0.0151	0.37	0.928	1.02	-0.0499	-0.762	0.0542	-1.07	0.399
group_17804	0.1	0.0141	0.379	0.78	0.905	0.767	-1.58	-0.0345	-0.641	0.336
group_32288	0.1	0.0141	0.379	0.78	0.905	0.767	-1.58	-0.0345	-0.641	0.336
aldA	0.114	0.0159	0.382	0.63	0.74	0.771	-1.58	-0.0189	-0.721	0.343
group_2492	0.0393	0.0173	0.383	-1.34	1.51	0.888	-0.345	0.0906	-1.09	0.425
group_2302	0.961	0.0173	0.386	1.34	1.51	-0.452	-0.347	0.0903	-1.09	0.418
group_10377	0.946	0.0128	0.39	0.711	0.818	0.162	-0.984	0.0726	-1.02	0.423
group_10378	0.946	0.0128	0.39	0.711	0.818	0.162	-0.984	0.0726	-1.02	0.423
estB_2	0.946	0.0128	0.39	0.711	0.818	0.162	-0.984	0.0726	-1.02	0.423
group_7887	0.946	0.0128	0.39	0.711	0.818	0.162	-0.984	0.0726	-1.02	0.423
group_8190	0.968	0.019	0.395	0.95	1.11	-0.0846	-0.932	0.0584	-1.05	0.432
group_7730	0.196	0.0212	0.403	0.373	0.454	0.765	-1.58	0.00851	-0.835	0.359
group_10533	0.946	0.0128	0.404	0.716	0.851	0.156	-0.975	0.0936	-1.02	0.389
pse1	0.0857	0.0398	0.406	0.581	0.723	0.791	-1.61	0.0204	-0.844	0.389
group_3562	0.954	0.0151	0.409	0.859	1.03	0.0148	-0.832	0.0793	-1.05	0.412
group_11195	0.264	0.0406	0.413	0.325	0.4	0.75	-1.57	-0.0421	-0.867	0.403
group_11196	0.264	0.0406	0.413	0.325	0.4	0.75	-1.57	-0.0421	-0.867	0.403
phoA2	0.954	0.0151	0.415	0.864	1.05	0.0113	-0.822	0.037	-1.07	0.361
appA_3	0.0964	0.0184	0.415	0.681	0.854	0.778	-1.59	-0.0166	-0.718	0.353
group_6509	0.95	0.0306	0.415	0.653	0.786	0.215	-1.11	0.085	-1.06	0.431
hin_1	0.186	0.0409	0.415	0.352	0.438	0.772	-1.63	0.043	-0.85	0.415
srpC_4	0.961	0.0173	0.433	1.21	1.51	-0.324	-0.48	0.088	-1.07	0.419
hisK	0.264	0.0406	0.435	0.309	0.399	0.754	-1.57	-0.0334	-0.873	0.398
group_2177	0.0964	0.0184	0.437	0.666	0.874	0.779	-1.59	-0.0154	-0.717	0.354
group_3431	0.0464	0.0151	0.438	-0.808	1.03	0.872	-0.872	0.0653	-1.02	0.477
group_1993	0.0964	0.0184	0.441	0.645	0.857	0.781	-1.6	-0.00516	-0.734	0.338
group_673	0.0964	0.0184	0.441	0.645	0.857	0.781	-1.6	-0.00516	-0.734	0.338
vgrG1_8	0.904	0.0437	0.445	0.404	0.522	0.47	-1.29	0.0408	-1.02	0.462
group_3186	0.296	0.0276	0.446	0.276	0.365	0.754	-1.57	0.00421	-0.883	0.349
group_10929	0.954	0.0151	0.453	0.777	1.02	0.0938	-0.912	0.0512	-1.06	0.358
group_1725	0.175	0.0344	0.455	0.332	0.452	0.78	-1.6	0.0291	-0.888	0.371
group_14551	0.95	0.0306	0.456	0.76	0.992	0.113	-0.929	0.0507	-1.05	0.513
group_5156	0.0464	0.0151	0.462	-0.756	1.02	0.869	-0.925	0.0442	-1.03	0.427
group_8821	0.0929	0.0238	0.468	0.591	0.831	0.786	-1.6	-0.00301	-0.775	0.367
group_17813	0.121	0.0278	0.479	0.424	0.611	0.787	-1.61	0.03	-0.838	0.372
group_12550	0.104	0.0337	0.479	0.462	0.668	0.792	-1.62	0.0202	-0.853	0.366
pvdQ	0.954	0.0151	0.481	0.705	0.988	0.162	-0.984	0.0764	-1.03	0.42
group_9005	0.132	0.0361	0.495	0.38	0.566	0.788	-1.61	0.0099	-0.868	0.39
group_14810	0.961	0.0173	0.501	0.981	1.43	-0.108	-0.702	0.0692	-1.06	0.426
rstA	0.961	0.0173	0.501	0.981	1.43	-0.108	-0.702	0.0692	-1.06	0.426
arnT_1	0.946	0.0128	0.505	0.571	0.851	0.292	-1.1	0.0774	-0.999	0.443
sulA_2	0.961	0.0173	0.507	0.962	1.42	-0.0894	-0.719	0.0549	-1.06	0.429
group_6390	0.0536	0.0128	0.514	-0.555	0.845	0.863	-1.12	0.0763	-1	0.429
group_15393	0.243	0.0318	0.514	0.275	0.423	0.771	-1.65	0.0751	-0.857	0.33
group_2334	0.225	0.0192	0.515	0.278	0.432	0.774	-1.59	0.0486	-0.864	0.346
group_10556	0.85	0.0314	0.516	0.261	0.399	0.611	-1.43	0.0763	-0.974	0.427
group_10648	0.811	0.0313	0.518	0.242	0.373	0.638	-1.45	0.106	-0.962	0.425
group_10650	0.811	0.0313	0.518	0.242	0.373	0.638	-1.45	0.106	-0.962	0.425
group_13532	0.811	0.0313	0.518	0.242	0.373	0.638	-1.45	0.106	-0.962	0.425
group_14722	0.811	0.0313	0.518	0.242	0.373	0.638	-1.45	0.106	-0.962	0.425
group_14723	0.811	0.0313	0.518	0.242	0.373	0.638	-1.45	0.106	-0.962	0.425
group_14724	0.811	0.0313	0.518	0.242	0.373	0.638	-1.45	0.106	-0.962	0.425
gpFI	0.811	0.0313	0.518	0.242	0.373	0.638	-1.45	0.106	-0.962	0.425
group_14727	0.811	0.0313	0.518	0.242	0.373	0.638	-1.45	0.106	-0.962	0.425
group_14728	0.811	0.0313	0.518	0.242	0.373	0.638	-1.45	0.106	-0.962	0.425
group_5290	0.811	0.0313	0.518	0.242	0.373	0.638	-1.45	0.106	-0.962	0.425
group_8095	0.811	0.0313	0.518	0.242	0.373	0.638	-1.45	0.106	-0.962	0.425
group_11130	0.189	0.0313	0.518	-0.242	0.373	0.88	-1.45	0.106	-0.962	0.425
group_2478	0.932	0.0354	0.52	0.434	0.663	0.43	-1.26	0.0816	-1.04	0.433
group_8296	0.932	0.0354	0.52	0.445	0.68	0.419	-1.24	0.0553	-1.04	0.417
group_11871	0.136	0.0286	0.525	0.361	0.578	0.789	-1.61	0.0306	-0.849	0.4
group_2464	0.954	0.0151	0.534	0.637	1.02	0.226	-1.04	0.0844	-1.03	0.423
group_12561	0.121	0.0278	0.536	0.408	0.669	0.789	-1.61	0.00159	-0.831	0.382
virB4_2	0.121	0.0278	0.536	0.408	0.669	0.789	-1.61	0.00159	-0.831	0.382
group_12563	0.121	0.0278	0.536	0.408	0.669	0.789	-1.61	0.00159	-0.831	0.382
ptlH_2	0.121	0.0278	0.536	0.408	0.669	0.789	-1.61	0.00159	-0.831	0.382
catM_1	0.121	0.0278	0.536	0.408	0.669	0.789	-1.61	0.00159	-0.831	0.382
group_12571	0.121	0.0278	0.536	0.408	0.669	0.789	-1.61	0.00159	-0.831	0.382
group_12572	0.121	0.0278	0.536	0.408	0.669	0.789	-1.61	0.00159	-0.831	0.382
group_12573	0.121	0.0278	0.536	0.408	0.669	0.789	-1.61	0.00159	-0.831	0.382
group_12574	0.121	0.0278	0.536	0.408	0.669	0.789	-1.61	0.00159	-0.831	0.382
group_12575	0.121	0.0278	0.536	0.408	0.669	0.789	-1.61	0.00159	-0.831	0.382
group_20704	0.121	0.0278	0.536	0.408	0.669	0.789	-1.61	0.00159	-0.831	0.382
group_20745	0.121	0.0278	0.536	0.408	0.669	0.789	-1.61	0.00159	-0.831	0.382
group_20746	0.121	0.0278	0.536	0.408	0.669	0.789	-1.61	0.00159	-0.831	0.382
group_20748	0.121	0.0278	0.536	0.408	0.669	0.789	-1.61	0.00159	-0.831	0.382
group_20749	0.121	0.0278	0.536	0.408	0.669	0.789	-1.61	0.00159	-0.831	0.382
group_20750	0.121	0.0278	0.536	0.408	0.669	0.789	-1.61	0.00159	-0.831	0.382
group_20751	0.121	0.0278	0.536	0.408	0.669	0.789	-1.61	0.00159	-0.831	0.382
group_20752	0.121	0.0278	0.536	0.408	0.669	0.789	-1.61	0.00159	-0.831	0.382
group_20753	0.121	0.0278	0.536	0.408	0.669	0.789	-1.61	0.00159	-0.831	0.382
group_20754	0.121	0.0278	0.536	0.408	0.669	0.789	-1.61	0.00159	-0.831	0.382
group_20755	0.121	0.0278	0.536	0.408	0.669	0.789	-1.61	0.00159	-0.831	0.382
group_20756	0.121	0.0278	0.536	0.408	0.669	0.789	-1.61	0.00159	-0.831	0.382
group_20757	0.121	0.0278	0.536	0.408	0.669	0.789	-1.61	0.00159	-0.831	0.382
group_20758	0.121	0.0278	0.536	0.408	0.669	0.789	-1.61	0.00159	-0.831	0.382
group_20759	0.121	0.0278	0.536	0.408	0.669	0.789	-1.61	0.00159	-0.831	0.382
group_20760	0.121	0.0278	0.536	0.408	0.669	0.789	-1.61	0.00159	-0.831	0.382
intS_4	0.121	0.0278	0.536	0.408	0.669	0.789	-1.61	0.00159	-0.831	0.382
group_522	0.121	0.0278	0.536	0.408	0.669	0.789	-1.61	0.00159	-0.831	0.382
soj_5	0.121	0.0278	0.536	0.408	0.669	0.789	-1.61	0.00159	-0.831	0.382
group_9183	0.121	0.0278	0.536	0.408	0.669	0.789	-1.61	0.00159	-0.831	0.382
group_814	0.2	0.0169	0.537	0.303	0.495	0.776	-1.6	0.0671	-0.847	0.306
intS_1	0.211	0.045	0.547	0.251	0.42	0.783	-1.6	0.0651	-0.888	0.458
group_12194	0.193	0.0265	0.551	0.272	0.461	0.784	-1.6	0.0453	-0.889	0.34
group_19495	0.193	0.0265	0.551	0.272	0.461	0.784	-1.6	0.0453	-0.889	0.34
group_19496	0.193	0.0265	0.551	0.272	0.461	0.784	-1.6	0.0453	-0.889	0.34
group_19498	0.193	0.0265	0.551	0.272	0.461	0.784	-1.6	0.0453	-0.889	0.34
group_19499	0.193	0.0265	0.551	0.272	0.461	0.784	-1.6	0.0453	-0.889	0.34
group_3134	0.193	0.0265	0.551	0.272	0.461	0.784	-1.6	0.0453	-0.889	0.34
group_20677	0.0964	0.0184	0.552	0.562	0.955	0.786	-1.6	0.00153	-0.745	0.352
group_7069	0.0964	0.0184	0.552	0.562	0.955	0.786	-1.6	0.00153	-0.745	0.352
group_4032	0.0571	0.025	0.552	-0.392	0.654	0.854	-1.39	0.0766	-0.997	0.42
group_14580	0.961	0.0173	0.555	0.863	1.44	0.00457	-0.815	0.0568	-1.05	0.412
group_6339	0.961	0.0173	0.555	0.863	1.44	0.00457	-0.815	0.0568	-1.05	0.412
group_6340	0.961	0.0173	0.555	0.863	1.44	0.00457	-0.815	0.0568	-1.05	0.412
group_12552	0.0929	0.0238	0.557	0.516	0.891	0.792	-1.61	0.0047	-0.791	0.38
group_20653	0.0929	0.0238	0.557	0.516	0.891	0.792	-1.61	0.0047	-0.791	0.38
group_20654	0.0929	0.0238	0.557	0.516	0.891	0.792	-1.61	0.0047	-0.791	0.38
group_20655	0.0929	0.0238	0.557	0.516	0.891	0.792	-1.61	0.0047	-0.791	0.38
group_20656	0.0929	0.0238	0.557	0.516	0.891	0.792	-1.61	0.0047	-0.791	0.38
garR_2	0.789	0.045	0.56	-0.242	0.418	1.03	-1.61	0.0617	-0.893	0.451
group_5995	0.946	0.0128	0.562	0.496	0.851	0.363	-1.18	0.0814	-1	0.414
group_9580	0.0571	0.025	0.563	-0.479	0.819	0.861	-1.2	0.0595	-1.01	0.477
group_5355	0.0393	0.0173	0.564	-0.822	1.4	0.867	-0.858	0.0813	-1.05	0.42
tam_2	0.932	0.0354	0.564	0.396	0.678	0.464	-1.28	0.0626	-1.04	0.414
malT_1	0.954	0.0151	0.566	0.592	1.02	0.269	-1.09	0.064	-1.02	0.415
group_19139	0.114	0.0448	0.568	0.346	0.615	0.797	-1.62	0.0275	-0.881	0.416
group_19465	0.107	0.0263	0.575	0.415	0.751	0.794	-1.62	0.0151	-0.831	0.38
group_19466	0.107	0.0263	0.575	0.415	0.751	0.794	-1.62	0.0151	-0.831	0.38
group_14013	0.746	0.0361	0.576	-0.23	0.413	1.01	-1.65	0.074	-0.885	0.343
group_5164	0.0393	0.0173	0.586	-0.779	1.41	0.865	-0.899	0.0809	-1.05	0.423
group_6228	0.0571	0.025	0.586	-0.433	0.783	0.858	-1.25	0.0716	-1.03	0.429
group_542	0.95	0.0306	0.593	0.513	0.943	0.346	-1.17	0.0784	-1.04	0.437
group_8131	0.0393	0.0173	0.594	-0.767	1.42	0.864	-0.909	0.0571	-1.04	0.438
group_12180	0.189	0.033	0.594	0.241	0.456	0.79	-1.61	0.0495	-0.911	0.351
group_19438	0.189	0.033	0.594	0.241	0.456	0.79	-1.61	0.0495	-0.911	0.351
group_19439	0.189	0.033	0.594	0.241	0.456	0.79	-1.61	0.0495	-0.911	0.351
rstB_2	0.932	0.0354	0.594	0.366	0.679	0.492	-1.31	0.0651	-1.02	0.446
rapA_5	0.1	0.0431	0.598	0.359	0.692	0.801	-1.62	0.0317	-0.878	0.415
group_512	0.275	0.0452	0.602	0.223	0.428	0.774	-1.59	0.105	-0.87	0.482
group_20712	0.118	0.0354	0.603	0.319	0.622	0.799	-1.63	0.0423	-0.885	0.391
zraR_5	0.961	0.0173	0.605	0.727	1.39	0.135	-0.953	0.0689	-1.04	0.427
group_3519	0.129	0.0454	0.617	0.281	0.57	0.8	-1.63	0.0301	-0.913	0.387
group_7113	0.129	0.0454	0.617	0.281	0.57	0.8	-1.63	0.0301	-0.913	0.387
group_2491	0.961	0.0173	0.621	0.702	1.4	0.159	-0.977	0.0675	-1.05	0.4
group_12492	0.107	0.0263	0.621	0.371	0.76	0.798	-1.62	0.0278	-0.846	0.383
group_17809	0.0893	0.0308	0.623	0.421	0.865	0.801	-1.62	0.0193	-0.846	0.385
group_10998	0.95	0.0306	0.636	0.471	0.98	0.385	-1.2	0.0566	-1.04	0.43
cmoA_2	0.95	0.0306	0.636	0.471	0.98	0.385	-1.2	0.0566	-1.04	0.43
ilvG	0.95	0.0306	0.636	0.471	0.98	0.385	-1.2	0.0566	-1.04	0.43
group_2501	0.95	0.0306	0.636	0.471	0.98	0.385	-1.2	0.0566	-1.04	0.43
group_8284	0.95	0.0306	0.636	0.471	0.98	0.385	-1.2	0.0566	-1.04	0.43
group_4042	0.0393	0.0173	0.637	-0.675	1.41	0.86	-1	0.0693	-1.04	0.423
group_15356	0.954	0.0151	0.641	0.487	1.04	0.369	-1.18	0.0783	-1.02	0.425
group_8426	0.232	0.0277	0.646	0.192	0.42	0.791	-1.61	0.0584	-0.918	0.365
group_8427	0.232	0.0277	0.646	0.192	0.42	0.791	-1.61	0.0584	-0.918	0.365
group_10380	0.943	0.025	0.651	0.358	0.781	0.496	-1.32	0.0719	-1.02	0.428
cmpD	0.943	0.025	0.651	0.358	0.781	0.496	-1.32	0.0719	-1.02	0.428
group_12209	0.943	0.025	0.651	0.358	0.781	0.496	-1.32	0.0719	-1.02	0.428
tauD_2	0.943	0.025	0.651	0.358	0.781	0.496	-1.32	0.0719	-1.02	0.428
sutR_2	0.943	0.025	0.651	0.358	0.781	0.496	-1.32	0.0719	-1.02	0.428
group_7046	0.943	0.025	0.651	0.358	0.781	0.496	-1.32	0.0719	-1.02	0.428
group_7889	0.943	0.025	0.651	0.358	0.781	0.496	-1.32	0.0719	-1.02	0.428
group_19497	0.189	0.033	0.651	0.209	0.465	0.796	-1.62	0.0494	-0.92	0.367
group_3650	0.921	0.0457	0.654	0.303	0.671	0.554	-1.37	0.0463	-0.998	0.501
group_3793	0.0607	0.0444	0.656	-0.337	0.744	0.854	-1.35	0.0768	-1.05	0.42
group_12555	0.132	0.0361	0.662	0.256	0.592	0.802	-1.63	0.0387	-0.908	0.384
group_7244	0.132	0.0361	0.662	0.256	0.592	0.802	-1.63	0.0387	-0.908	0.384
group_9175	0.132	0.0361	0.662	0.256	0.592	0.802	-1.63	0.0387	-0.908	0.384
fabG_1	0.961	0.0173	0.669	0.613	1.42	0.244	-1.06	0.0597	-1.04	0.414
group_14000	0.961	0.0173	0.67	0.6	1.39	0.257	-1.08	0.0691	-1.03	0.428
dauA	0.961	0.0173	0.67	0.6	1.39	0.257	-1.08	0.0691	-1.03	0.428
fecI_1	0.961	0.0173	0.67	0.6	1.39	0.257	-1.08	0.0691	-1.03	0.428
group_14026	0.961	0.0173	0.67	0.6	1.39	0.257	-1.08	0.0691	-1.03	0.428
group_5020	0.961	0.0173	0.67	0.6	1.39	0.257	-1.08	0.0691	-1.03	0.428
group_6023	0.961	0.0173	0.67	0.6	1.39	0.257	-1.08	0.0691	-1.03	0.428
group_7488	0.961	0.0173	0.67	0.6	1.39	0.257	-1.08	0.0691	-1.03	0.428
group_9742	0.961	0.0173	0.67	0.6	1.39	0.257	-1.08	0.0691	-1.03	0.428
catD_4	0.961	0.0173	0.68	0.583	1.4	0.273	-1.09	0.0773	-1.04	0.421
group_20640	0.0929	0.0238	0.682	0.402	0.985	0.801	-1.62	0.0191	-0.83	0.379
group_20642	0.0929	0.0238	0.682	0.402	0.985	0.801	-1.62	0.0191	-0.83	0.379
group_20643	0.0929	0.0238	0.682	0.402	0.985	0.801	-1.62	0.0191	-0.83	0.379
group_20649	0.0929	0.0238	0.682	0.402	0.985	0.801	-1.62	0.0191	-0.83	0.379
group_20688	0.0929	0.0238	0.682	0.402	0.985	0.801	-1.62	0.0191	-0.83	0.379
group_20689	0.0929	0.0238	0.682	0.402	0.985	0.801	-1.62	0.0191	-0.83	0.379
group_20690	0.0929	0.0238	0.682	0.402	0.985	0.801	-1.62	0.0191	-0.83	0.379
group_20691	0.0929	0.0238	0.682	0.402	0.985	0.801	-1.62	0.0191	-0.83	0.379
group_20694	0.0929	0.0238	0.682	0.402	0.985	0.801	-1.62	0.0191	-0.83	0.379
group_20695	0.0929	0.0238	0.682	0.402	0.985	0.801	-1.62	0.0191	-0.83	0.379
group_20696	0.0929	0.0238	0.682	0.402	0.985	0.801	-1.62	0.0191	-0.83	0.379
group_20698	0.0929	0.0238	0.682	0.402	0.985	0.801	-1.62	0.0191	-0.83	0.379
group_20699	0.0929	0.0238	0.682	0.402	0.985	0.801	-1.62	0.0191	-0.83	0.379
group_20700	0.0929	0.0238	0.682	0.402	0.985	0.801	-1.62	0.0191	-0.83	0.379
group_20701	0.0929	0.0238	0.682	0.402	0.985	0.801	-1.62	0.0191	-0.83	0.379
group_20702	0.0929	0.0238	0.682	0.402	0.985	0.801	-1.62	0.0191	-0.83	0.379
group_20703	0.0929	0.0238	0.682	0.402	0.985	0.801	-1.62	0.0191	-0.83	0.379
traG_2	0.0929	0.0238	0.682	0.402	0.985	0.801	-1.62	0.0191	-0.83	0.379
group_20706	0.0929	0.0238	0.682	0.402	0.985	0.801	-1.62	0.0191	-0.83	0.379
ephA_2	0.0929	0.0238	0.682	0.402	0.985	0.801	-1.62	0.0191	-0.83	0.379
nahD	0.0929	0.0238	0.682	0.402	0.985	0.801	-1.62	0.0191	-0.83	0.379
group_20709	0.0929	0.0238	0.682	0.402	0.985	0.801	-1.62	0.0191	-0.83	0.379
group_20710	0.0929	0.0238	0.682	0.402	0.985	0.801	-1.62	0.0191	-0.83	0.379
echA8	0.0929	0.0238	0.682	0.402	0.985	0.801	-1.62	0.0191	-0.83	0.379
group_20736	0.0929	0.0238	0.682	0.402	0.985	0.801	-1.62	0.0191	-0.83	0.379
group_20737	0.0929	0.0238	0.682	0.402	0.985	0.801	-1.62	0.0191	-0.83	0.379
group_20738	0.0929	0.0238	0.682	0.402	0.985	0.801	-1.62	0.0191	-0.83	0.379
group_20739	0.0929	0.0238	0.682	0.402	0.985	0.801	-1.62	0.0191	-0.83	0.379
group_20740	0.0929	0.0238	0.682	0.402	0.985	0.801	-1.62	0.0191	-0.83	0.379
group_20741	0.0929	0.0238	0.682	0.402	0.985	0.801	-1.62	0.0191	-0.83	0.379
group_20742	0.0929	0.0238	0.682	0.402	0.985	0.801	-1.62	0.0191	-0.83	0.379
group_20743	0.0929	0.0238	0.682	0.402	0.985	0.801	-1.62	0.0191	-0.83	0.379
group_20744	0.0929	0.0238	0.682	0.402	0.985	0.801	-1.62	0.0191	-0.83	0.379
parB_2	0.0929	0.0238	0.682	0.402	0.985	0.801	-1.62	0.0191	-0.83	0.379
group_5829	0.0929	0.0238	0.682	0.402	0.985	0.801	-1.62	0.0191	-0.83	0.379
group_7241	0.0929	0.0238	0.682	0.402	0.985	0.801	-1.62	0.0191	-0.83	0.379
group_7245	0.0929	0.0238	0.682	0.402	0.985	0.801	-1.62	0.0191	-0.83	0.379
treA	0.943	0.025	0.683	0.326	0.79	0.526	-1.35	0.0803	-1.02	0.421
group_2125	0.0393	0.0173	0.686	-0.572	1.4	0.856	-1.1	0.0763	-1.04	0.419
pdeG	0.961	0.0173	0.687	0.563	1.39	0.292	-1.11	0.0697	-1.03	0.426
rlmF	0.961	0.0173	0.687	0.563	1.39	0.292	-1.11	0.0697	-1.03	0.426
group_9714	0.961	0.0173	0.687	0.563	1.39	0.292	-1.11	0.0697	-1.03	0.426
ctpF	0.95	0.0306	0.688	0.381	0.933	0.472	-1.3	0.0769	-1.04	0.425
nemA_2	0.954	0.0151	0.694	0.404	1.02	0.448	-1.27	0.0716	-1.02	0.404
group_5335	0.961	0.0173	0.698	0.545	1.39	0.309	-1.13	0.0684	-1.03	0.427
htrE	0.943	0.025	0.699	0.316	0.811	0.535	-1.35	0.0745	-1.02	0.432
group_11004	0.939	0.0444	0.705	0.296	0.772	0.555	-1.38	0.0611	-1.04	0.42
kynB	0.939	0.0444	0.705	0.296	0.772	0.555	-1.38	0.0611	-1.04	0.42
fecR_11	0.939	0.0444	0.705	0.296	0.772	0.555	-1.38	0.0611	-1.04	0.42
yejB_1	0.939	0.0444	0.705	0.296	0.772	0.555	-1.38	0.0611	-1.04	0.42
iscS_2	0.939	0.0444	0.705	0.296	0.772	0.555	-1.38	0.0611	-1.04	0.42
group_14996	0.939	0.0444	0.705	0.296	0.772	0.555	-1.38	0.0611	-1.04	0.42
hcaT_1	0.939	0.0444	0.705	0.296	0.772	0.555	-1.38	0.0611	-1.04	0.42
yejF_1	0.939	0.0444	0.705	0.296	0.772	0.555	-1.38	0.0611	-1.04	0.42
group_8289	0.939	0.0444	0.705	0.296	0.772	0.555	-1.38	0.0611	-1.04	0.42
group_1341	0.0893	0.0308	0.712	0.331	0.903	0.807	-1.63	0.0334	-0.88	0.389
group_5976	0.961	0.0173	0.715	0.51	1.38	0.343	-1.17	0.069	-1.03	0.424
group_6556	0.05	0.0306	0.719	-0.342	0.936	0.85	-1.33	0.0754	-1.04	0.427
group_5370	0.95	0.0306	0.73	0.322	0.923	0.527	-1.36	0.0743	-1.04	0.417
proP_4	0.0393	0.0173	0.732	-0.479	1.39	0.852	-1.2	0.0767	-1.03	0.413
group_7711	0.95	0.0306	0.732	0.316	0.912	0.533	-1.36	0.0702	-1.03	0.427
pucI_1	0.957	0.037	0.738	-0.417	1.27	1.23	-2.09	0.0735	-1.06	0.445
group_10227	0.957	0.037	0.738	-0.417	1.27	1.23	-2.09	0.0735	-1.06	0.445
group_2964	0.957	0.037	0.738	-0.417	1.27	1.23	-2.09	0.0735	-1.06	0.445
proY_1	0.957	0.037	0.738	-0.417	1.27	1.23	-2.09	0.0735	-1.06	0.445
group_7775	0.957	0.037	0.738	-0.417	1.27	1.23	-2.09	0.0735	-1.06	0.445
group_5143	0.943	0.025	0.741	0.264	0.794	0.584	-1.41	0.0748	-1.02	0.431
group_5043	0.0429	0.037	0.748	0.406	1.29	0.816	-2.08	0.0674	-1.06	0.433
group_7123	0.2	0.0388	0.749	0.145	0.454	0.805	-1.63	0.057	-0.954	0.38
group_15499	0.146	0.0361	0.75	0.178	0.562	0.809	-1.64	0.051	-0.938	0.395
puuR_1	0.939	0.0444	0.758	0.25	0.805	0.598	-1.42	0.052	-1.04	0.399
ampD	0.939	0.0444	0.764	0.226	0.746	0.621	-1.45	0.073	-1.03	0.432
group_4040	0.95	0.0306	0.767	0.283	0.945	0.564	-1.39	0.0607	-1.04	0.409
group_13922	0.961	0.0173	0.77	0.404	1.38	0.444	-1.27	0.076	-1.03	0.414
pncC_1	0.961	0.0173	0.77	0.404	1.38	0.444	-1.27	0.076	-1.03	0.414
recX	0.961	0.0173	0.77	0.404	1.38	0.444	-1.27	0.076	-1.03	0.414
tilS	0.961	0.0173	0.77	0.404	1.38	0.444	-1.27	0.076	-1.03	0.414
actIII_2	0.961	0.0173	0.771	0.407	1.39	0.442	-1.27	0.0692	-1.03	0.405
group_6337	0.961	0.0173	0.771	0.407	1.39	0.442	-1.27	0.0692	-1.03	0.405
group_10200	0.961	0.0173	0.787	0.397	1.46	0.451	-1.27	0.0667	-1.03	0.416
group_14446	0.961	0.0173	0.787	0.397	1.46	0.451	-1.27	0.0667	-1.03	0.416
group_6250	0.961	0.0173	0.787	0.397	1.46	0.451	-1.27	0.0667	-1.03	0.416
nemA_1	0.943	0.025	0.79	0.217	0.807	0.628	-1.45	0.0751	-1.02	0.429
group_11560	0.05	0.0306	0.79	-0.265	0.99	0.846	-1.41	0.0618	-1.02	0.457
ubiE_3	0.0893	0.0308	0.791	0.258	0.974	0.813	-1.64	0.0385	-0.909	0.399
srpC_3	0.0893	0.0308	0.791	0.258	0.974	0.813	-1.64	0.0385	-0.909	0.399
group_20658	0.0893	0.0308	0.791	0.258	0.974	0.813	-1.64	0.0385	-0.909	0.399
group_20659	0.0893	0.0308	0.791	0.258	0.974	0.813	-1.64	0.0385	-0.909	0.399
group_20660	0.0893	0.0308	0.791	0.258	0.974	0.813	-1.64	0.0385	-0.909	0.399
group_20661	0.0893	0.0308	0.791	0.258	0.974	0.813	-1.64	0.0385	-0.909	0.399
ant1	0.0893	0.0308	0.791	0.258	0.974	0.813	-1.64	0.0385	-0.909	0.399
yvbK	0.0893	0.0308	0.791	0.258	0.974	0.813	-1.64	0.0385	-0.909	0.399
group_20664	0.0893	0.0308	0.791	0.258	0.974	0.813	-1.64	0.0385	-0.909	0.399
group_20715	0.0893	0.0308	0.791	0.258	0.974	0.813	-1.64	0.0385	-0.909	0.399
group_20716	0.0893	0.0308	0.791	0.258	0.974	0.813	-1.64	0.0385	-0.909	0.399
group_20717	0.0893	0.0308	0.791	0.258	0.974	0.813	-1.64	0.0385	-0.909	0.399
group_20718	0.0893	0.0308	0.791	0.258	0.974	0.813	-1.64	0.0385	-0.909	0.399
group_20719	0.0893	0.0308	0.791	0.258	0.974	0.813	-1.64	0.0385	-0.909	0.399
group_20720	0.0893	0.0308	0.791	0.258	0.974	0.813	-1.64	0.0385	-0.909	0.399
group_20721	0.0893	0.0308	0.791	0.258	0.974	0.813	-1.64	0.0385	-0.909	0.399
group_20722	0.0893	0.0308	0.791	0.258	0.974	0.813	-1.64	0.0385	-0.909	0.399
paeR7IM	0.0893	0.0308	0.791	0.258	0.974	0.813	-1.64	0.0385	-0.909	0.399
group_20724	0.0893	0.0308	0.791	0.258	0.974	0.813	-1.64	0.0385	-0.909	0.399
group_20725	0.0893	0.0308	0.791	0.258	0.974	0.813	-1.64	0.0385	-0.909	0.399
group_20726	0.0893	0.0308	0.791	0.258	0.974	0.813	-1.64	0.0385	-0.909	0.399
group_20727	0.0893	0.0308	0.791	0.258	0.974	0.813	-1.64	0.0385	-0.909	0.399
group_20728	0.0893	0.0308	0.791	0.258	0.974	0.813	-1.64	0.0385	-0.909	0.399
group_20729	0.0893	0.0308	0.791	0.258	0.974	0.813	-1.64	0.0385	-0.909	0.399
group_20730	0.0893	0.0308	0.791	0.258	0.974	0.813	-1.64	0.0385	-0.909	0.399
group_20731	0.0893	0.0308	0.791	0.258	0.974	0.813	-1.64	0.0385	-0.909	0.399
group_20732	0.0893	0.0308	0.791	0.258	0.974	0.813	-1.64	0.0385	-0.909	0.399
group_20733	0.0893	0.0308	0.791	0.258	0.974	0.813	-1.64	0.0385	-0.909	0.399
group_20734	0.0893	0.0308	0.791	0.258	0.974	0.813	-1.64	0.0385	-0.909	0.399
group_7239	0.0893	0.0308	0.791	0.258	0.974	0.813	-1.64	0.0385	-0.909	0.399
group_9181	0.0893	0.0308	0.791	0.258	0.974	0.813	-1.64	0.0385	-0.909	0.399
higB2	0.107	0.0263	0.796	0.229	0.89	0.811	-1.64	0.0363	-0.907	0.399
oatA_1	0.957	0.037	0.796	-0.329	1.29	1.15	-2	0.0667	-1.05	0.435
group_8317	0.964	0.0441	0.805	0.255	1.02	0.586	-1.48	0.0621	-1.04	0.421
group_13898	0.961	0.0173	0.817	0.339	1.45	0.507	-1.33	0.0731	-1.03	0.427
group_13959	0.961	0.0173	0.817	0.339	1.45	0.507	-1.33	0.0731	-1.03	0.427
group_14465	0.961	0.0173	0.817	0.339	1.45	0.507	-1.33	0.0731	-1.03	0.427
group_2696	0.961	0.0173	0.817	0.339	1.45	0.507	-1.33	0.0731	-1.03	0.427
group_4997	0.961	0.0173	0.817	0.339	1.45	0.507	-1.33	0.0731	-1.03	0.427
group_4998	0.961	0.0173	0.817	0.339	1.45	0.507	-1.33	0.0731	-1.03	0.427
smvA_1	0.961	0.0173	0.817	0.339	1.45	0.507	-1.33	0.0731	-1.03	0.427
group_5958	0.961	0.0173	0.817	0.339	1.45	0.507	-1.33	0.0731	-1.03	0.427
group_7420	0.961	0.0173	0.817	0.339	1.45	0.507	-1.33	0.0731	-1.03	0.427
group_10135	0.961	0.0173	0.824	0.323	1.44	0.523	-1.35	0.0725	-1.03	0.426
yeiR	0.961	0.0173	0.825	0.325	1.46	0.521	-1.34	0.0727	-1.03	0.426
group_6284	0.0429	0.037	0.825	0.282	1.29	0.821	-1.95	0.0712	-1.05	0.431
group_14326	0.95	0.0306	0.827	0.212	0.959	0.632	-1.46	0.0634	-1.04	0.415
group_14008	0.957	0.037	0.827	0.28	1.26	0.564	-1.39	0.0713	-1.04	0.431
prpR_1	0.957	0.037	0.827	0.28	1.26	0.564	-1.39	0.0713	-1.04	0.431
group_14019	0.957	0.037	0.827	0.28	1.26	0.564	-1.39	0.0713	-1.04	0.431
sttH_1	0.957	0.037	0.827	0.28	1.26	0.564	-1.39	0.0713	-1.04	0.431
group_5013	0.957	0.037	0.827	0.28	1.26	0.564	-1.39	0.0713	-1.04	0.431
group_6009	0.957	0.037	0.827	0.28	1.26	0.564	-1.39	0.0713	-1.04	0.431
group_6018	0.957	0.037	0.827	0.28	1.26	0.564	-1.39	0.0713	-1.04	0.431
group_6019	0.957	0.037	0.827	0.28	1.26	0.564	-1.39	0.0713	-1.04	0.431
group_7471	0.957	0.037	0.827	0.28	1.26	0.564	-1.39	0.0713	-1.04	0.431
group_8378	0.957	0.037	0.827	0.28	1.26	0.564	-1.39	0.0713	-1.04	0.431
group_9733	0.957	0.037	0.827	0.28	1.26	0.564	-1.39	0.0713	-1.04	0.431
group_9738	0.957	0.037	0.827	0.28	1.26	0.564	-1.39	0.0713	-1.04	0.431
group_9739	0.957	0.037	0.827	0.28	1.26	0.564	-1.39	0.0713	-1.04	0.431
group_2423	0.957	0.037	0.848	-0.239	1.26	1.06	-1.91	0.0704	-1.05	0.431
ycgM	0.957	0.037	0.85	0.24	1.25	0.603	-1.43	0.0651	-1.04	0.436
genK	0.957	0.037	0.856	-0.227	1.26	1.05	-1.9	0.0743	-1.04	0.445
pat_3	0.957	0.037	0.859	0.227	1.26	0.616	-1.45	0.0651	-1.04	0.425
group_10950	0.957	0.037	0.859	0.227	1.26	0.616	-1.45	0.0651	-1.04	0.425
iolS_1	0.957	0.037	0.859	0.227	1.26	0.616	-1.45	0.0651	-1.04	0.425
group_14932	0.957	0.037	0.859	0.227	1.26	0.616	-1.45	0.0651	-1.04	0.425
tldD_1	0.957	0.037	0.859	0.227	1.26	0.616	-1.45	0.0651	-1.04	0.425
group_20692	0.0857	0.0398	0.871	0.153	0.949	0.821	-1.65	0.052	-0.964	0.412
group_20693	0.0857	0.0398	0.871	0.153	0.949	0.821	-1.65	0.052	-0.964	0.412
phnB	0.957	0.037	0.876	-0.19	1.23	1.01	-1.86	0.0677	-1.04	0.437
group_18824	0.1	0.0431	0.877	-0.144	0.933	0.846	-1.69	0.0907	-1.12	0.451
group_8282	0.939	0.0444	0.883	0.116	0.785	0.723	-1.55	0.0676	-1.03	0.43
group_10332	0.957	0.037	0.888	-0.176	1.26	1	-1.85	0.068	-1.04	0.432
group_379	0.05	0.0306	0.889	-0.131	0.941	0.839	-1.54	0.0729	-1.03	0.427
group_7011	0.0857	0.0398	0.889	0.133	0.958	0.823	-1.66	0.0544	-0.974	0.415
group_813	0.186	0.0409	0.889	0.0693	0.496	0.82	-1.65	0.0681	-0.996	0.405
yjaB_2	0.957	0.037	0.891	0.171	1.24	0.669	-1.5	0.0715	-1.04	0.431
yopE_2	0.957	0.037	0.892	-0.172	1.28	0.997	-1.84	0.0704	-1.04	0.435
group_1142	0.0429	0.037	0.892	-0.167	1.22	0.84	-1.51	0.0711	-1.04	0.43
ybbJ	0.95	0.0306	0.895	-0.128	0.97	0.954	-1.8	0.0686	-1.05	0.434
group_4346	0.95	0.0306	0.895	-0.128	0.97	0.954	-1.8	0.0686	-1.05	0.434
group_5368	0.957	0.037	0.896	0.161	1.22	0.679	-1.51	0.0703	-1.04	0.424
group_3332	0.957	0.037	0.904	-0.146	1.22	0.972	-1.82	0.0678	-1.04	0.437
etk	0.957	0.037	0.915	0.13	1.22	0.708	-1.54	0.0706	-1.04	0.426
queF	0.957	0.037	0.918	0.131	1.26	0.707	-1.54	0.0728	-1.04	0.426
group_10541	0.957	0.037	0.918	0.131	1.26	0.707	-1.54	0.0728	-1.04	0.426
group_12933	0.957	0.037	0.918	0.131	1.26	0.707	-1.54	0.0728	-1.04	0.426
group_8039	0.957	0.037	0.918	0.131	1.26	0.707	-1.54	0.0728	-1.04	0.426
group_8040	0.957	0.037	0.918	0.131	1.26	0.707	-1.54	0.0728	-1.04	0.426
phnX_1	0.957	0.037	0.918	0.131	1.26	0.707	-1.54	0.0728	-1.04	0.426
petE	0.957	0.037	0.918	0.131	1.26	0.707	-1.54	0.0728	-1.04	0.426
ldcC	0.957	0.037	0.919	-0.128	1.27	0.955	-1.8	0.0719	-1.04	0.434
group_5251	0.957	0.037	0.919	-0.128	1.27	0.955	-1.8	0.0719	-1.04	0.434
group_11898	0.114	0.0448	0.919	0.0703	0.695	0.825	-1.66	0.0631	-1	0.418
group_12557	0.114	0.0448	0.919	0.0703	0.695	0.825	-1.66	0.0631	-1	0.418
group_12558	0.114	0.0448	0.919	0.0703	0.695	0.825	-1.66	0.0631	-1	0.418
rhaS_2	0.114	0.0448	0.919	0.0703	0.695	0.825	-1.66	0.0631	-1	0.418
group_20681	0.114	0.0448	0.919	0.0703	0.695	0.825	-1.66	0.0631	-1	0.418
group_20682	0.114	0.0448	0.919	0.0703	0.695	0.825	-1.66	0.0631	-1	0.418
group_20683	0.114	0.0448	0.919	0.0703	0.695	0.825	-1.66	0.0631	-1	0.418
group_9176	0.114	0.0448	0.919	0.0703	0.695	0.825	-1.66	0.0631	-1	0.418
group_12183	0.1	0.0431	0.926	0.0765	0.823	0.826	-1.66	0.0596	-0.999	0.421
group_19451	0.1	0.0431	0.926	0.0765	0.823	0.826	-1.66	0.0596	-0.999	0.421
group_9003	0.1	0.0431	0.926	0.0765	0.823	0.826	-1.66	0.0596	-0.999	0.421
group_5947	0.957	0.037	0.934	0.102	1.22	0.735	-1.57	0.0692	-1.04	0.431
group_4211	0.0429	0.037	0.935	0.104	1.28	0.828	-1.78	0.0689	-1.04	0.432
holC	0.964	0.0441	0.948	-0.0661	1.02	0.897	-1.72	0.0714	-1.04	0.432
group_8037	0.957	0.037	0.952	0.0765	1.27	0.759	-1.6	0.0706	-1.04	0.43
rof	0.957	0.037	0.956	0.0676	1.22	0.768	-1.6	0.0696	-1.04	0.429
fliK	0.957	0.037	0.96	0.0619	1.24	0.773	-1.61	0.0706	-1.04	0.431
group_10582	0.957	0.037	0.962	-0.0585	1.25	0.889	-1.73	0.0694	-1.04	0.432
cheB_1	0.957	0.037	0.976	-0.0366	1.21	0.868	-1.71	0.0706	-1.04	0.431
group_18858	0.129	0.0454	0.976	0.0207	0.686	0.83	-1.67	0.0666	-1.03	0.428
hsdR_2	0.104	0.0337	0.979	-0.0255	0.952	0.835	-1.68	0.074	-1.05	0.435
group_18788	0.104	0.0337	0.979	-0.0255	0.952	0.835	-1.68	0.074	-1.05	0.435
group_18815	0.104	0.0337	0.979	-0.0255	0.952	0.835	-1.68	0.074	-1.05	0.435
group_18825	0.104	0.0337	0.979	-0.0255	0.952	0.835	-1.68	0.074	-1.05	0.435
group_18826	0.104	0.0337	0.979	-0.0255	0.952	0.835	-1.68	0.074	-1.05	0.435
rnlA	0.104	0.0337	0.979	-0.0255	0.952	0.835	-1.68	0.074	-1.05	0.435
rnlB	0.104	0.0337	0.979	-0.0255	0.952	0.835	-1.68	0.074	-1.05	0.435
group_18829	0.104	0.0337	0.979	-0.0255	0.952	0.835	-1.68	0.074	-1.05	0.435
group_18830	0.104	0.0337	0.979	-0.0255	0.952	0.835	-1.68	0.074	-1.05	0.435
group_18831	0.104	0.0337	0.979	-0.0255	0.952	0.835	-1.68	0.074	-1.05	0.435
group_18832	0.104	0.0337	0.979	-0.0255	0.952	0.835	-1.68	0.074	-1.05	0.435
group_18833	0.104	0.0337	0.979	-0.0255	0.952	0.835	-1.68	0.074	-1.05	0.435
group_18834	0.104	0.0337	0.979	-0.0255	0.952	0.835	-1.68	0.074	-1.05	0.435
group_18835	0.104	0.0337	0.979	-0.0255	0.952	0.835	-1.68	0.074	-1.05	0.435
group_18836	0.104	0.0337	0.979	-0.0255	0.952	0.835	-1.68	0.074	-1.05	0.435
group_18837	0.104	0.0337	0.979	-0.0255	0.952	0.835	-1.68	0.074	-1.05	0.435
group_18838	0.104	0.0337	0.979	-0.0255	0.952	0.835	-1.68	0.074	-1.05	0.435
group_18839	0.104	0.0337	0.979	-0.0255	0.952	0.835	-1.68	0.074	-1.05	0.435
group_18840	0.104	0.0337	0.979	-0.0255	0.952	0.835	-1.68	0.074	-1.05	0.435
umuC_1	0.104	0.0337	0.979	-0.0255	0.952	0.835	-1.68	0.074	-1.05	0.435
group_5999	0.957	0.037	0.979	0.0322	1.22	0.802	-1.64	0.07	-1.04	0.431
baeR_1	0.957	0.037	0.986	0.0217	1.22	0.812	-1.65	0.0703	-1.04	0.43
group_6078	0.0429	0.037	0.989	-0.0174	1.23	0.833	-1.65	0.0703	-1.04	0.431
slyX	0.957	0.037	0.991	0.0136	1.23	0.82	-1.66	0.0703	-1.04	0.43
group_4554	0.0429	0.037	0.998	0.00379	1.31	0.832	-1.67	0.0703	-1.04	0.431

## Sheet: Suppl. Table 5
Suppl. Table 5. Core genome SNPs significantly associated with biofilm growth at 22 °C compared to 37 °C using Pyseer.
variant	af	filter-pvalue	lrt-pvalue	beta	beta-std-err	intercept	PC1	PC2	PC3	PC4	PC5	PC6	PC7	PC8	PC9	PC10	lineage	k-samples	nk-samples	notes
4880116_A_T	0.216	6.13e-08	3.57e-06	1.93	0.434	-1.3	0.184	0.0721	0.385	1.37	0.443	0.675	-0.638	-1.51	0.556	-0.267	MDS3	WH-SGI-V-07050,WH-SGI-V-07053,WH-SGI-V-07054,WH-SGI-V-07055,WH-SGI-V-07059,WH-SGI-V-07064,WH-SGI-V-07066,WH-SGI-V-07165,WH-SGI-V-07166,WH-SGI-V-07169,WH-SGI-V-07183,WH-SGI-V-07185,WH-SGI-V-07187,WH-SGI-V-07225,WH-SGI-V-07232,WH-SGI-V-07233,WH-SGI-V-07234,WH-SGI-V-07252,WH-SGI-V-07261,WH-SGI-V-07263,WH-SGI-V-07265,WH-SGI-V-07266,WH-SGI-V-07278,WH-SGI-V-07281,WH-SGI-V-07282,WH-SGI-V-07283,WH-SGI-V-…	WH-SGI-V-07049,WH-SGI-V-07051,WH-SGI-V-07056,WH-SGI-V-07057,WH-SGI-V-07058,WH-SGI-V-07060,WH-SGI-V-07061,WH-SGI-V-07062,WH-SGI-V-07063,WH-SGI-V-07065,WH-SGI-V-07067,WH-SGI-V-07068,WH-SGI-V-07069,WH-SGI-V-07070,WH-SGI-V-07071,WH-SGI-V-07073,WH-SGI-V-07074,WH-SGI-V-07167,WH-SGI-V-07168,WH-SGI-V-07170,WH-SGI-V-07171,WH-SGI-V-07172,WH-SGI-V-07173,WH-SGI-V-07174,WH-SGI-V-07175,WH-SGI-V-07176,WH-SGI-V-…
315601T_C	0.378	0.195	4.58e-06	-7.47	2.13	1.86	-0.658	-5.91	0.851	-0.637	1.66	-0.362	0.281	1.26	1.28	-2.43	MDS2	WH-SGI-V-07050,WH-SGI-V-07054,WH-SGI-V-07059,WH-SGI-V-07067,WH-SGI-V-07070,WH-SGI-V-07166,WH-SGI-V-07167,WH-SGI-V-07169,WH-SGI-V-07170,WH-SGI-V-07172,WH-SGI-V-07176,WH-SGI-V-07177,WH-SGI-V-07181,WH-SGI-V-07183,WH-SGI-V-07185,WH-SGI-V-07186,WH-SGI-V-07227,WH-SGI-V-07229,WH-SGI-V-07231,WH-SGI-V-07232,WH-SGI-V-07239,WH-SGI-V-07241,WH-SGI-V-07243,WH-SGI-V-07247,WH-SGI-V-07248,WH-SGI-V-07251,WH-SGI-V-…	WH-SGI-V-07049,WH-SGI-V-07051,WH-SGI-V-07053,WH-SGI-V-07055,WH-SGI-V-07056,WH-SGI-V-07057,WH-SGI-V-07058,WH-SGI-V-07060,WH-SGI-V-07061,WH-SGI-V-07062,WH-SGI-V-07063,WH-SGI-V-07064,WH-SGI-V-07065,WH-SGI-V-07066,WH-SGI-V-07068,WH-SGI-V-07069,WH-SGI-V-07071,WH-SGI-V-07073,WH-SGI-V-07074,WH-SGI-V-07165,WH-SGI-V-07168,WH-SGI-V-07171,WH-SGI-V-07173,WH-SGI-V-07174,WH-SGI-V-07175,WH-SGI-V-07178,WH-SGI-V-…
5790328_A_G	0.356	0.178	4.77e-06	-7.36	2.13	1.77	-0.647	-5.81	0.758	-0.725	1.46	-0.41	0.34	0.84	1.5	-2.37	MDS2	WH-SGI-V-07050,WH-SGI-V-07054,WH-SGI-V-07059,WH-SGI-V-07070,WH-SGI-V-07166,WH-SGI-V-07167,WH-SGI-V-07169,WH-SGI-V-07170,WH-SGI-V-07172,WH-SGI-V-07176,WH-SGI-V-07177,WH-SGI-V-07181,WH-SGI-V-07183,WH-SGI-V-07185,WH-SGI-V-07186,WH-SGI-V-07227,WH-SGI-V-07229,WH-SGI-V-07231,WH-SGI-V-07232,WH-SGI-V-07239,WH-SGI-V-07241,WH-SGI-V-07243,WH-SGI-V-07247,WH-SGI-V-07248,WH-SGI-V-07251,WH-SGI-V-07252,WH-SGI-V-…	WH-SGI-V-07049,WH-SGI-V-07051,WH-SGI-V-07053,WH-SGI-V-07055,WH-SGI-V-07056,WH-SGI-V-07057,WH-SGI-V-07058,WH-SGI-V-07060,WH-SGI-V-07061,WH-SGI-V-07062,WH-SGI-V-07063,WH-SGI-V-07064,WH-SGI-V-07065,WH-SGI-V-07066,WH-SGI-V-07067,WH-SGI-V-07068,WH-SGI-V-07069,WH-SGI-V-07071,WH-SGI-V-07073,WH-SGI-V-07074,WH-SGI-V-07165,WH-SGI-V-07168,WH-SGI-V-07171,WH-SGI-V-07173,WH-SGI-V-07174,WH-SGI-V-07175,WH-SGI-V-…
3775637_A_G	0.385	0.233	7.72e-06	-7.65	2.15	1.95	-0.813	-6.09	0.89	-0.761	1.67	-0.607	0.389	1.04	1.4	-2.4	MDS2	WH-SGI-V-07050,WH-SGI-V-07054,WH-SGI-V-07059,WH-SGI-V-07067,WH-SGI-V-07070,WH-SGI-V-07166,WH-SGI-V-07167,WH-SGI-V-07169,WH-SGI-V-07170,WH-SGI-V-07172,WH-SGI-V-07176,WH-SGI-V-07177,WH-SGI-V-07181,WH-SGI-V-07183,WH-SGI-V-07185,WH-SGI-V-07186,WH-SGI-V-07227,WH-SGI-V-07229,WH-SGI-V-07231,WH-SGI-V-07232,WH-SGI-V-07236,WH-SGI-V-07239,WH-SGI-V-07241,WH-SGI-V-07243,WH-SGI-V-07247,WH-SGI-V-07248,WH-SGI-V-…	WH-SGI-V-07049,WH-SGI-V-07051,WH-SGI-V-07053,WH-SGI-V-07055,WH-SGI-V-07056,WH-SGI-V-07057,WH-SGI-V-07058,WH-SGI-V-07060,WH-SGI-V-07061,WH-SGI-V-07062,WH-SGI-V-07063,WH-SGI-V-07064,WH-SGI-V-07065,WH-SGI-V-07066,WH-SGI-V-07068,WH-SGI-V-07069,WH-SGI-V-07071,WH-SGI-V-07073,WH-SGI-V-07074,WH-SGI-V-07165,WH-SGI-V-07168,WH-SGI-V-07171,WH-SGI-V-07173,WH-SGI-V-07174,WH-SGI-V-07175,WH-SGI-V-07178,WH-SGI-V-…
3992888_T_C	0.385	0.233	9.95e-06	-7.47	2.14	1.88	-0.735	-5.94	0.871	-0.749	1.65	-0.587	0.351	0.961	1.46	-2.43	MDS2	WH-SGI-V-07050,WH-SGI-V-07054,WH-SGI-V-07059,WH-SGI-V-07070,WH-SGI-V-07166,WH-SGI-V-07167,WH-SGI-V-07169,WH-SGI-V-07170,WH-SGI-V-07172,WH-SGI-V-07176,WH-SGI-V-07177,WH-SGI-V-07178,WH-SGI-V-07181,WH-SGI-V-07183,WH-SGI-V-07185,WH-SGI-V-07186,WH-SGI-V-07227,WH-SGI-V-07229,WH-SGI-V-07231,WH-SGI-V-07232,WH-SGI-V-07239,WH-SGI-V-07241,WH-SGI-V-07243,WH-SGI-V-07247,WH-SGI-V-07248,WH-SGI-V-07251,WH-SGI-V-…	WH-SGI-V-07049,WH-SGI-V-07051,WH-SGI-V-07053,WH-SGI-V-07055,WH-SGI-V-07056,WH-SGI-V-07057,WH-SGI-V-07058,WH-SGI-V-07060,WH-SGI-V-07061,WH-SGI-V-07062,WH-SGI-V-07063,WH-SGI-V-07064,WH-SGI-V-07065,WH-SGI-V-07066,WH-SGI-V-07067,WH-SGI-V-07068,WH-SGI-V-07069,WH-SGI-V-07071,WH-SGI-V-07073,WH-SGI-V-07074,WH-SGI-V-07165,WH-SGI-V-07168,WH-SGI-V-07171,WH-SGI-V-07173,WH-SGI-V-07174,WH-SGI-V-07175,WH-SGI-V-…
3972644_A_G	0.468	0.0464	1.11e-05	-2.25	0.608	0.109	2.65	-1.58	1.29	0.541	0.953	-0.245	-0.502	-0.918	-0.0243	-1.36	MDS2	WH-SGI-V-07049,WH-SGI-V-07051,WH-SGI-V-07054,WH-SGI-V-07055,WH-SGI-V-07059,WH-SGI-V-07070,WH-SGI-V-07165,WH-SGI-V-07166,WH-SGI-V-07167,WH-SGI-V-07169,WH-SGI-V-07170,WH-SGI-V-07172,WH-SGI-V-07176,WH-SGI-V-07177,WH-SGI-V-07183,WH-SGI-V-07185,WH-SGI-V-07186,WH-SGI-V-07227,WH-SGI-V-07229,WH-SGI-V-07231,WH-SGI-V-07232,WH-SGI-V-07234,WH-SGI-V-07238,WH-SGI-V-07239,WH-SGI-V-07241,WH-SGI-V-07242,WH-SGI-V-…	WH-SGI-V-07050,WH-SGI-V-07053,WH-SGI-V-07056,WH-SGI-V-07057,WH-SGI-V-07058,WH-SGI-V-07060,WH-SGI-V-07061,WH-SGI-V-07062,WH-SGI-V-07063,WH-SGI-V-07064,WH-SGI-V-07065,WH-SGI-V-07066,WH-SGI-V-07067,WH-SGI-V-07068,WH-SGI-V-07069,WH-SGI-V-07071,WH-SGI-V-07073,WH-SGI-V-07074,WH-SGI-V-07168,WH-SGI-V-07171,WH-SGI-V-07173,WH-SGI-V-07174,WH-SGI-V-07175,WH-SGI-V-07178,WH-SGI-V-07179,WH-SGI-V-07180,WH-SGI-V-…
3845580_A_G	0.529	0.195	1.14e-05	-2.23	0.568	0.248	3.07	-1.36	1.27	0.528	0.674	0.163	-1.34	-1.52	1.4	-2.51	MDS2	WH-SGI-V-07050,WH-SGI-V-07054,WH-SGI-V-07055,WH-SGI-V-07057,WH-SGI-V-07059,WH-SGI-V-07064,WH-SGI-V-07070,WH-SGI-V-07165,WH-SGI-V-07166,WH-SGI-V-07167,WH-SGI-V-07169,WH-SGI-V-07170,WH-SGI-V-07172,WH-SGI-V-07176,WH-SGI-V-07177,WH-SGI-V-07178,WH-SGI-V-07181,WH-SGI-V-07183,WH-SGI-V-07184,WH-SGI-V-07185,WH-SGI-V-07186,WH-SGI-V-07187,WH-SGI-V-07224,WH-SGI-V-07227,WH-SGI-V-07228,WH-SGI-V-07229,WH-SGI-V-…	WH-SGI-V-07049,WH-SGI-V-07051,WH-SGI-V-07053,WH-SGI-V-07056,WH-SGI-V-07058,WH-SGI-V-07060,WH-SGI-V-07061,WH-SGI-V-07062,WH-SGI-V-07063,WH-SGI-V-07065,WH-SGI-V-07066,WH-SGI-V-07067,WH-SGI-V-07068,WH-SGI-V-07069,WH-SGI-V-07071,WH-SGI-V-07073,WH-SGI-V-07074,WH-SGI-V-07168,WH-SGI-V-07171,WH-SGI-V-07173,WH-SGI-V-07174,WH-SGI-V-07175,WH-SGI-V-07179,WH-SGI-V-07180,WH-SGI-V-07182,WH-SGI-V-07188,WH-SGI-V-…
1761909_C_T	0.209	0.00011	1.17e-05	-2.54	0.717	-0.422	1.27	0.655	-0.312	0.343	2.55	-1.37	-0.847	-1.38	-0.134	-1.2	MDS5	WH-SGI-V-07051,WH-SGI-V-07065,WH-SGI-V-07168,WH-SGI-V-07171,WH-SGI-V-07173,WH-SGI-V-07174,WH-SGI-V-07175,WH-SGI-V-07178,WH-SGI-V-07180,WH-SGI-V-07187,WH-SGI-V-07221,WH-SGI-V-07228,WH-SGI-V-07236,WH-SGI-V-07253,WH-SGI-V-07256,WH-SGI-V-07259,WH-SGI-V-07260,WH-SGI-V-07279,WH-SGI-V-07290,WH-SGI-V-07291,WH-SGI-V-07296,WH-SGI-V-07311,WH-SGI-V-07317,WH-SGI-V-07320,WH-SGI-V-07322,WH-SGI-V-07323,WH-SGI-V-…	WH-SGI-V-07049,WH-SGI-V-07050,WH-SGI-V-07053,WH-SGI-V-07054,WH-SGI-V-07055,WH-SGI-V-07056,WH-SGI-V-07057,WH-SGI-V-07058,WH-SGI-V-07059,WH-SGI-V-07060,WH-SGI-V-07061,WH-SGI-V-07062,WH-SGI-V-07063,WH-SGI-V-07064,WH-SGI-V-07066,WH-SGI-V-07067,WH-SGI-V-07068,WH-SGI-V-07069,WH-SGI-V-07070,WH-SGI-V-07071,WH-SGI-V-07073,WH-SGI-V-07074,WH-SGI-V-07165,WH-SGI-V-07166,WH-SGI-V-07167,WH-SGI-V-07169,WH-SGI-V-…
1499696_C_G	0.209	0.00485	1.21e-05	1.71	0.404	-1.26	2.26	0.276	0.916	1.29	0.723	-1.24	-1.34	-1.55	-0.0793	-2.15	MDS7	WH-SGI-V-07049,WH-SGI-V-07056,WH-SGI-V-07058,WH-SGI-V-07063,WH-SGI-V-07065,WH-SGI-V-07070,WH-SGI-V-07166,WH-SGI-V-07167,WH-SGI-V-07172,WH-SGI-V-07181,WH-SGI-V-07188,WH-SGI-V-07226,WH-SGI-V-07227,WH-SGI-V-07231,WH-SGI-V-07233,WH-SGI-V-07241,WH-SGI-V-07243,WH-SGI-V-07248,WH-SGI-V-07251,WH-SGI-V-07252,WH-SGI-V-07255,WH-SGI-V-07258,WH-SGI-V-07263,WH-SGI-V-07265,WH-SGI-V-07266,WH-SGI-V-07277,WH-SGI-V-…	WH-SGI-V-07050,WH-SGI-V-07051,WH-SGI-V-07053,WH-SGI-V-07054,WH-SGI-V-07055,WH-SGI-V-07057,WH-SGI-V-07059,WH-SGI-V-07060,WH-SGI-V-07061,WH-SGI-V-07062,WH-SGI-V-07064,WH-SGI-V-07066,WH-SGI-V-07067,WH-SGI-V-07068,WH-SGI-V-07069,WH-SGI-V-07071,WH-SGI-V-07073,WH-SGI-V-07074,WH-SGI-V-07165,WH-SGI-V-07168,WH-SGI-V-07169,WH-SGI-V-07170,WH-SGI-V-07171,WH-SGI-V-07173,WH-SGI-V-07174,WH-SGI-V-07175,WH-SGI-V-…
6178666_A_G	0.32	0.179	1.6e-05	-2.55	0.673	-0.0948	2.54	-1.56	1.15	0.932	1.46	-1.59	-1.09	-1.01	-0.857	-1.93	MDS2	WH-SGI-V-07054,WH-SGI-V-07059,WH-SGI-V-07165,WH-SGI-V-07166,WH-SGI-V-07167,WH-SGI-V-07169,WH-SGI-V-07170,WH-SGI-V-07176,WH-SGI-V-07177,WH-SGI-V-07181,WH-SGI-V-07183,WH-SGI-V-07185,WH-SGI-V-07186,WH-SGI-V-07229,WH-SGI-V-07232,WH-SGI-V-07234,WH-SGI-V-07236,WH-SGI-V-07239,WH-SGI-V-07241,WH-SGI-V-07243,WH-SGI-V-07247,WH-SGI-V-07248,WH-SGI-V-07255,WH-SGI-V-07258,WH-SGI-V-07261,WH-SGI-V-07263,WH-SGI-V-…	WH-SGI-V-07049,WH-SGI-V-07050,WH-SGI-V-07051,WH-SGI-V-07053,WH-SGI-V-07055,WH-SGI-V-07056,WH-SGI-V-07057,WH-SGI-V-07058,WH-SGI-V-07060,WH-SGI-V-07061,WH-SGI-V-07062,WH-SGI-V-07063,WH-SGI-V-07064,WH-SGI-V-07065,WH-SGI-V-07066,WH-SGI-V-07067,WH-SGI-V-07068,WH-SGI-V-07069,WH-SGI-V-07070,WH-SGI-V-07071,WH-SGI-V-07073,WH-SGI-V-07074,WH-SGI-V-07168,WH-SGI-V-07171,WH-SGI-V-07172,WH-SGI-V-07173,WH-SGI-V-…
6177646_G_T	0.0827	4.18e-06	1.66e-05	2.12	0.529	-1.05	1.95	-0.231	0.704	0.448	0.578	0.0582	-0.873	-0.927	0.135	-1.53	MDS3	WH-SGI-V-07053,WH-SGI-V-07056,WH-SGI-V-07058,WH-SGI-V-07060,WH-SGI-V-07061,WH-SGI-V-07062,WH-SGI-V-07063,WH-SGI-V-07069,WH-SGI-V-07187,WH-SGI-V-07188,WH-SGI-V-07226,WH-SGI-V-07233,WH-SGI-V-07314,WH-SGI-V-07383,WH-SGI-V-07413,WH-SGI-V-07416,WH-SGI-V-07428,WH-SGI-V-07490,WH-SGI-V-07630,WH-SGI-V-07638,WH-SGI-V-07649,WH-SGI-V-07682,WH-SGI-V-07708	WH-SGI-V-07049,WH-SGI-V-07050,WH-SGI-V-07051,WH-SGI-V-07054,WH-SGI-V-07055,WH-SGI-V-07057,WH-SGI-V-07059,WH-SGI-V-07064,WH-SGI-V-07065,WH-SGI-V-07066,WH-SGI-V-07067,WH-SGI-V-07068,WH-SGI-V-07070,WH-SGI-V-07071,WH-SGI-V-07073,WH-SGI-V-07074,WH-SGI-V-07165,WH-SGI-V-07166,WH-SGI-V-07167,WH-SGI-V-07168,WH-SGI-V-07169,WH-SGI-V-07170,WH-SGI-V-07171,WH-SGI-V-07172,WH-SGI-V-07173,WH-SGI-V-07174,WH-SGI-V-…
335890T_G	0.374	0.224	1.97e-05	-7.45	2.15	1.86	-0.721	-5.92	0.795	-0.689	1.45	-0.508	0.431	1.14	1.34	-2.38	MDS2	WH-SGI-V-07050,WH-SGI-V-07054,WH-SGI-V-07059,WH-SGI-V-07070,WH-SGI-V-07166,WH-SGI-V-07167,WH-SGI-V-07169,WH-SGI-V-07170,WH-SGI-V-07172,WH-SGI-V-07176,WH-SGI-V-07177,WH-SGI-V-07181,WH-SGI-V-07183,WH-SGI-V-07185,WH-SGI-V-07186,WH-SGI-V-07227,WH-SGI-V-07228,WH-SGI-V-07229,WH-SGI-V-07231,WH-SGI-V-07232,WH-SGI-V-07239,WH-SGI-V-07241,WH-SGI-V-07243,WH-SGI-V-07247,WH-SGI-V-07248,WH-SGI-V-07251,WH-SGI-V-…	WH-SGI-V-07049,WH-SGI-V-07051,WH-SGI-V-07053,WH-SGI-V-07055,WH-SGI-V-07056,WH-SGI-V-07057,WH-SGI-V-07058,WH-SGI-V-07060,WH-SGI-V-07061,WH-SGI-V-07062,WH-SGI-V-07063,WH-SGI-V-07064,WH-SGI-V-07065,WH-SGI-V-07066,WH-SGI-V-07067,WH-SGI-V-07068,WH-SGI-V-07069,WH-SGI-V-07071,WH-SGI-V-07073,WH-SGI-V-07074,WH-SGI-V-07165,WH-SGI-V-07168,WH-SGI-V-07171,WH-SGI-V-07173,WH-SGI-V-07174,WH-SGI-V-07175,WH-SGI-V-…
6103850_T_C	0.367	0.0633	2.19e-05	-2.81	0.82	0.0847	3.73	-1.27	1.42	-1.65	0.856	2.14	0.556	0.227	-0.425	-1.72	MDS2	WH-SGI-V-07050,WH-SGI-V-07054,WH-SGI-V-07055,WH-SGI-V-07059,WH-SGI-V-07061,WH-SGI-V-07062,WH-SGI-V-07064,WH-SGI-V-07070,WH-SGI-V-07074,WH-SGI-V-07165,WH-SGI-V-07166,WH-SGI-V-07167,WH-SGI-V-07169,WH-SGI-V-07172,WH-SGI-V-07181,WH-SGI-V-07183,WH-SGI-V-07184,WH-SGI-V-07185,WH-SGI-V-07227,WH-SGI-V-07229,WH-SGI-V-07231,WH-SGI-V-07232,WH-SGI-V-07234,WH-SGI-V-07236,WH-SGI-V-07239,WH-SGI-V-07241,WH-SGI-V-…	WH-SGI-V-07049,WH-SGI-V-07051,WH-SGI-V-07053,WH-SGI-V-07056,WH-SGI-V-07057,WH-SGI-V-07058,WH-SGI-V-07060,WH-SGI-V-07063,WH-SGI-V-07065,WH-SGI-V-07066,WH-SGI-V-07067,WH-SGI-V-07068,WH-SGI-V-07069,WH-SGI-V-07071,WH-SGI-V-07073,WH-SGI-V-07168,WH-SGI-V-07170,WH-SGI-V-07171,WH-SGI-V-07173,WH-SGI-V-07174,WH-SGI-V-07175,WH-SGI-V-07176,WH-SGI-V-07177,WH-SGI-V-07178,WH-SGI-V-07179,WH-SGI-V-07180,WH-SGI-V-…
2294949_C_T	0.165	0.00107	2.42e-05	-1.98	0.539	-0.6	1.56	0.287	1.44	0.823	1.05	0.105	-0.525	-0.0656	-0.385	-1.39	MDS2	WH-SGI-V-07065,WH-SGI-V-07067,WH-SGI-V-07071,WH-SGI-V-07073,WH-SGI-V-07074,WH-SGI-V-07178,WH-SGI-V-07184,WH-SGI-V-07228,WH-SGI-V-07236,WH-SGI-V-07238,WH-SGI-V-07242,WH-SGI-V-07250,WH-SGI-V-07253,WH-SGI-V-07290,WH-SGI-V-07291,WH-SGI-V-07300,WH-SGI-V-07311,WH-SGI-V-07312,WH-SGI-V-07372,WH-SGI-V-07374,WH-SGI-V-07377,WH-SGI-V-07386,WH-SGI-V-07409,WH-SGI-V-07411,WH-SGI-V-07414,WH-SGI-V-07417,WH-SGI-V-…	WH-SGI-V-07049,WH-SGI-V-07050,WH-SGI-V-07051,WH-SGI-V-07053,WH-SGI-V-07054,WH-SGI-V-07055,WH-SGI-V-07056,WH-SGI-V-07057,WH-SGI-V-07058,WH-SGI-V-07059,WH-SGI-V-07060,WH-SGI-V-07061,WH-SGI-V-07062,WH-SGI-V-07063,WH-SGI-V-07064,WH-SGI-V-07066,WH-SGI-V-07068,WH-SGI-V-07069,WH-SGI-V-07070,WH-SGI-V-07165,WH-SGI-V-07166,WH-SGI-V-07167,WH-SGI-V-07168,WH-SGI-V-07169,WH-SGI-V-07170,WH-SGI-V-07171,WH-SGI-V-…
6118989_A_G	0.248	0.00407	2.62e-05	-2.18	0.579	-0.405	3.55	-0.385	1.28	-0.2	0.363	0.907	0.417	1.03	-0.129	-0.576	MDS7	WH-SGI-V-07050,WH-SGI-V-07055,WH-SGI-V-07059,WH-SGI-V-07064,WH-SGI-V-07074,WH-SGI-V-07165,WH-SGI-V-07167,WH-SGI-V-07172,WH-SGI-V-07183,WH-SGI-V-07185,WH-SGI-V-07222,WH-SGI-V-07223,WH-SGI-V-07227,WH-SGI-V-07229,WH-SGI-V-07231,WH-SGI-V-07234,WH-SGI-V-07235,WH-SGI-V-07241,WH-SGI-V-07242,WH-SGI-V-07243,WH-SGI-V-07248,WH-SGI-V-07250,WH-SGI-V-07251,WH-SGI-V-07252,WH-SGI-V-07255,WH-SGI-V-07258,WH-SGI-V-…	WH-SGI-V-07049,WH-SGI-V-07051,WH-SGI-V-07053,WH-SGI-V-07054,WH-SGI-V-07056,WH-SGI-V-07057,WH-SGI-V-07058,WH-SGI-V-07060,WH-SGI-V-07061,WH-SGI-V-07062,WH-SGI-V-07063,WH-SGI-V-07065,WH-SGI-V-07066,WH-SGI-V-07067,WH-SGI-V-07068,WH-SGI-V-07069,WH-SGI-V-07070,WH-SGI-V-07071,WH-SGI-V-07073,WH-SGI-V-07166,WH-SGI-V-07168,WH-SGI-V-07169,WH-SGI-V-07170,WH-SGI-V-07171,WH-SGI-V-07173,WH-SGI-V-07174,WH-SGI-V-…
346013_G_A	0.209	0.00358	2.63e-05	-2.24	0.589	-0.475	1.43	-0.58	1.49	-0.789	1.81	0.345	-0.961	-0.78	0.897	-0.804	MDS9	WH-SGI-V-07059,WH-SGI-V-07166,WH-SGI-V-07172,WH-SGI-V-07178,WH-SGI-V-07183,WH-SGI-V-07185,WH-SGI-V-07227,WH-SGI-V-07229,WH-SGI-V-07231,WH-SGI-V-07251,WH-SGI-V-07252,WH-SGI-V-07255,WH-SGI-V-07258,WH-SGI-V-07263,WH-SGI-V-07265,WH-SGI-V-07279,WH-SGI-V-07284,WH-SGI-V-07286,WH-SGI-V-07290,WH-SGI-V-07293,WH-SGI-V-07297,WH-SGI-V-07306,WH-SGI-V-07311,WH-SGI-V-07312,WH-SGI-V-07313,WH-SGI-V-07368,WH-SGI-V-…	WH-SGI-V-07049,WH-SGI-V-07050,WH-SGI-V-07051,WH-SGI-V-07053,WH-SGI-V-07054,WH-SGI-V-07055,WH-SGI-V-07056,WH-SGI-V-07057,WH-SGI-V-07058,WH-SGI-V-07060,WH-SGI-V-07061,WH-SGI-V-07062,WH-SGI-V-07063,WH-SGI-V-07064,WH-SGI-V-07065,WH-SGI-V-07066,WH-SGI-V-07067,WH-SGI-V-07068,WH-SGI-V-07069,WH-SGI-V-07070,WH-SGI-V-07071,WH-SGI-V-07073,WH-SGI-V-07074,WH-SGI-V-07165,WH-SGI-V-07167,WH-SGI-V-07168,WH-SGI-V-…
1514452_C_T	0.342	0.0241	2.75e-05	1.54	0.382	-1.44	2.5	0.0582	0.59	1.36	1.29	-1.02	-1.36	-2.38	0.453	-2.48	MDS10	WH-SGI-V-07049,WH-SGI-V-07050,WH-SGI-V-07056,WH-SGI-V-07058,WH-SGI-V-07059,WH-SGI-V-07063,WH-SGI-V-07065,WH-SGI-V-07066,WH-SGI-V-07070,WH-SGI-V-07071,WH-SGI-V-07073,WH-SGI-V-07074,WH-SGI-V-07166,WH-SGI-V-07167,WH-SGI-V-07172,WH-SGI-V-07181,WH-SGI-V-07183,WH-SGI-V-07185,WH-SGI-V-07188,WH-SGI-V-07225,WH-SGI-V-07226,WH-SGI-V-07227,WH-SGI-V-07228,WH-SGI-V-07231,WH-SGI-V-07233,WH-SGI-V-07236,WH-SGI-V-…	WH-SGI-V-07051,WH-SGI-V-07053,WH-SGI-V-07054,WH-SGI-V-07055,WH-SGI-V-07057,WH-SGI-V-07060,WH-SGI-V-07061,WH-SGI-V-07062,WH-SGI-V-07064,WH-SGI-V-07067,WH-SGI-V-07068,WH-SGI-V-07069,WH-SGI-V-07165,WH-SGI-V-07168,WH-SGI-V-07169,WH-SGI-V-07170,WH-SGI-V-07171,WH-SGI-V-07173,WH-SGI-V-07174,WH-SGI-V-07175,WH-SGI-V-07176,WH-SGI-V-07177,WH-SGI-V-07178,WH-SGI-V-07179,WH-SGI-V-07180,WH-SGI-V-07182,WH-SGI-V-…
115066G_A	0.194	0.0241	2.94e-05	-1.95	0.522	-0.55	1.51	0.379	1.57	0.814	0.822	0.136	-1.31	-1.3	1.13	-2.15	MDS2	WH-SGI-V-07050,WH-SGI-V-07057,WH-SGI-V-07067,WH-SGI-V-07178,WH-SGI-V-07179,WH-SGI-V-07224,WH-SGI-V-07228,WH-SGI-V-07229,WH-SGI-V-07236,WH-SGI-V-07237,WH-SGI-V-07238,WH-SGI-V-07244,WH-SGI-V-07246,WH-SGI-V-07249,WH-SGI-V-07253,WH-SGI-V-07254,WH-SGI-V-07260,WH-SGI-V-07267,WH-SGI-V-07279,WH-SGI-V-07290,WH-SGI-V-07291,WH-SGI-V-07300,WH-SGI-V-07311,WH-SGI-V-07312,WH-SGI-V-07314,WH-SGI-V-07316,WH-SGI-V-…	WH-SGI-V-07049,WH-SGI-V-07051,WH-SGI-V-07053,WH-SGI-V-07054,WH-SGI-V-07055,WH-SGI-V-07056,WH-SGI-V-07058,WH-SGI-V-07059,WH-SGI-V-07060,WH-SGI-V-07061,WH-SGI-V-07062,WH-SGI-V-07063,WH-SGI-V-07064,WH-SGI-V-07065,WH-SGI-V-07066,WH-SGI-V-07068,WH-SGI-V-07069,WH-SGI-V-07070,WH-SGI-V-07071,WH-SGI-V-07073,WH-SGI-V-07074,WH-SGI-V-07165,WH-SGI-V-07166,WH-SGI-V-07167,WH-SGI-V-07168,WH-SGI-V-07169,WH-SGI-V-…
2456005_A_G	0.0863	0.814	3.02e-05	-4.59	1.34	-0.514	6.12	-0.326	1.79	-0.924	1.7	-2.52	-1.68	1.37	0.107	-2.1	MDS4	WH-SGI-V-07050,WH-SGI-V-07055,WH-SGI-V-07059,WH-SGI-V-07064,WH-SGI-V-07183,WH-SGI-V-07185,WH-SGI-V-07229,WH-SGI-V-07234,WH-SGI-V-07261,WH-SGI-V-07263,WH-SGI-V-07265,WH-SGI-V-07287,WH-SGI-V-07293,WH-SGI-V-07312,WH-SGI-V-07368,WH-SGI-V-07370,WH-SGI-V-07376,WH-SGI-V-07384,WH-SGI-V-07420,WH-SGI-V-07618,WH-SGI-V-07632,WH-SGI-V-07637,WH-SGI-V-07647,WH-SGI-V-07707	WH-SGI-V-07049,WH-SGI-V-07051,WH-SGI-V-07053,WH-SGI-V-07054,WH-SGI-V-07056,WH-SGI-V-07057,WH-SGI-V-07058,WH-SGI-V-07060,WH-SGI-V-07061,WH-SGI-V-07062,WH-SGI-V-07063,WH-SGI-V-07065,WH-SGI-V-07066,WH-SGI-V-07067,WH-SGI-V-07068,WH-SGI-V-07069,WH-SGI-V-07070,WH-SGI-V-07071,WH-SGI-V-07073,WH-SGI-V-07074,WH-SGI-V-07165,WH-SGI-V-07166,WH-SGI-V-07167,WH-SGI-V-07168,WH-SGI-V-07169,WH-SGI-V-07170,WH-SGI-V-…
264504_T_C	0.374	0.343	3.59e-05	-7.63	2.16	1.92	-0.769	-6.09	0.828	-0.763	1.65	-0.605	0.373	1.12	1.39	-2.46	NA	WH-SGI-V-07050,WH-SGI-V-07054,WH-SGI-V-07059,WH-SGI-V-07070,WH-SGI-V-07166,WH-SGI-V-07167,WH-SGI-V-07169,WH-SGI-V-07170,WH-SGI-V-07172,WH-SGI-V-07176,WH-SGI-V-07177,WH-SGI-V-07181,WH-SGI-V-07183,WH-SGI-V-07185,WH-SGI-V-07186,WH-SGI-V-07227,WH-SGI-V-07229,WH-SGI-V-07231,WH-SGI-V-07232,WH-SGI-V-07239,WH-SGI-V-07241,WH-SGI-V-07243,WH-SGI-V-07247,WH-SGI-V-07248,WH-SGI-V-07251,WH-SGI-V-07252,WH-SGI-V-…	WH-SGI-V-07049,WH-SGI-V-07051,WH-SGI-V-07053,WH-SGI-V-07055,WH-SGI-V-07056,WH-SGI-V-07057,WH-SGI-V-07058,WH-SGI-V-07060,WH-SGI-V-07061,WH-SGI-V-07062,WH-SGI-V-07063,WH-SGI-V-07064,WH-SGI-V-07065,WH-SGI-V-07066,WH-SGI-V-07067,WH-SGI-V-07068,WH-SGI-V-07069,WH-SGI-V-07071,WH-SGI-V-07073,WH-SGI-V-07074,WH-SGI-V-07165,WH-SGI-V-07168,WH-SGI-V-07171,WH-SGI-V-07173,WH-SGI-V-07174,WH-SGI-V-07175,WH-SGI-V-…
1499415_C_T	0.237	0.0112	3.61e-05	1.58	0.395	-1.27	2.3	0.266	0.841	1.47	0.824	-0.826	-1	-1.81	0.0243	-2.18	MDS4	WH-SGI-V-07049,WH-SGI-V-07056,WH-SGI-V-07058,WH-SGI-V-07059,WH-SGI-V-07063,WH-SGI-V-07065,WH-SGI-V-07070,WH-SGI-V-07166,WH-SGI-V-07167,WH-SGI-V-07172,WH-SGI-V-07181,WH-SGI-V-07183,WH-SGI-V-07185,WH-SGI-V-07188,WH-SGI-V-07225,WH-SGI-V-07226,WH-SGI-V-07227,WH-SGI-V-07228,WH-SGI-V-07231,WH-SGI-V-07233,WH-SGI-V-07241,WH-SGI-V-07243,WH-SGI-V-07248,WH-SGI-V-07251,WH-SGI-V-07252,WH-SGI-V-07255,WH-SGI-V-…	WH-SGI-V-07050,WH-SGI-V-07051,WH-SGI-V-07053,WH-SGI-V-07054,WH-SGI-V-07055,WH-SGI-V-07057,WH-SGI-V-07060,WH-SGI-V-07061,WH-SGI-V-07062,WH-SGI-V-07064,WH-SGI-V-07066,WH-SGI-V-07067,WH-SGI-V-07068,WH-SGI-V-07069,WH-SGI-V-07071,WH-SGI-V-07073,WH-SGI-V-07074,WH-SGI-V-07165,WH-SGI-V-07168,WH-SGI-V-07169,WH-SGI-V-07170,WH-SGI-V-07171,WH-SGI-V-07173,WH-SGI-V-07174,WH-SGI-V-07175,WH-SGI-V-07176,WH-SGI-V-…
1514979_A_G	0.342	0.0241	3.63e-05	1.53	0.386	-1.43	2.48	0.0587	0.551	1.33	1.19	-1.13	-1.27	-2.01	0.596	-2.57	MDS10	WH-SGI-V-07049,WH-SGI-V-07056,WH-SGI-V-07058,WH-SGI-V-07059,WH-SGI-V-07063,WH-SGI-V-07066,WH-SGI-V-07070,WH-SGI-V-07071,WH-SGI-V-07073,WH-SGI-V-07074,WH-SGI-V-07166,WH-SGI-V-07167,WH-SGI-V-07172,WH-SGI-V-07181,WH-SGI-V-07183,WH-SGI-V-07185,WH-SGI-V-07188,WH-SGI-V-07225,WH-SGI-V-07226,WH-SGI-V-07227,WH-SGI-V-07231,WH-SGI-V-07233,WH-SGI-V-07236,WH-SGI-V-07238,WH-SGI-V-07241,WH-SGI-V-07243,WH-SGI-V-…	WH-SGI-V-07050,WH-SGI-V-07051,WH-SGI-V-07053,WH-SGI-V-07054,WH-SGI-V-07055,WH-SGI-V-07057,WH-SGI-V-07060,WH-SGI-V-07061,WH-SGI-V-07062,WH-SGI-V-07064,WH-SGI-V-07065,WH-SGI-V-07067,WH-SGI-V-07068,WH-SGI-V-07069,WH-SGI-V-07165,WH-SGI-V-07168,WH-SGI-V-07169,WH-SGI-V-07170,WH-SGI-V-07171,WH-SGI-V-07173,WH-SGI-V-07174,WH-SGI-V-07175,WH-SGI-V-07176,WH-SGI-V-07177,WH-SGI-V-07178,WH-SGI-V-07179,WH-SGI-V-…
1500366_C_T	0.227	0.0105	4.14e-05	1.61	0.405	-1.26	2.28	0.287	0.814	1.47	0.818	-0.881	-0.998	-1.78	-0.0152	-2.17	MDS4	WH-SGI-V-07049,WH-SGI-V-07056,WH-SGI-V-07058,WH-SGI-V-07059,WH-SGI-V-07063,WH-SGI-V-07070,WH-SGI-V-07166,WH-SGI-V-07167,WH-SGI-V-07172,WH-SGI-V-07181,WH-SGI-V-07183,WH-SGI-V-07185,WH-SGI-V-07188,WH-SGI-V-07225,WH-SGI-V-07226,WH-SGI-V-07227,WH-SGI-V-07228,WH-SGI-V-07231,WH-SGI-V-07233,WH-SGI-V-07241,WH-SGI-V-07243,WH-SGI-V-07248,WH-SGI-V-07251,WH-SGI-V-07252,WH-SGI-V-07255,WH-SGI-V-07258,WH-SGI-V-…	WH-SGI-V-07050,WH-SGI-V-07051,WH-SGI-V-07053,WH-SGI-V-07054,WH-SGI-V-07055,WH-SGI-V-07057,WH-SGI-V-07060,WH-SGI-V-07061,WH-SGI-V-07062,WH-SGI-V-07064,WH-SGI-V-07065,WH-SGI-V-07066,WH-SGI-V-07067,WH-SGI-V-07068,WH-SGI-V-07069,WH-SGI-V-07071,WH-SGI-V-07073,WH-SGI-V-07074,WH-SGI-V-07165,WH-SGI-V-07168,WH-SGI-V-07169,WH-SGI-V-07170,WH-SGI-V-07171,WH-SGI-V-07173,WH-SGI-V-07174,WH-SGI-V-07175,WH-SGI-V-…
2808455_C_G	0.101	7.19e-05	4.32e-05	1.83	0.463	-1.07	2.02	-0.238	0.716	0.544	1.06	-0.128	-0.906	-0.954	0.14	-1.8	MDS10	WH-SGI-V-07053,WH-SGI-V-07056,WH-SGI-V-07063,WH-SGI-V-07071,WH-SGI-V-07073,WH-SGI-V-07187,WH-SGI-V-07188,WH-SGI-V-07225,WH-SGI-V-07226,WH-SGI-V-07249,WH-SGI-V-07266,WH-SGI-V-07279,WH-SGI-V-07283,WH-SGI-V-07286,WH-SGI-V-07377,WH-SGI-V-07410,WH-SGI-V-07411,WH-SGI-V-07419,WH-SGI-V-07485,WH-SGI-V-07490,WH-SGI-V-07495,WH-SGI-V-07501,WH-SGI-V-07505,WH-SGI-V-07508,WH-SGI-V-07630,WH-SGI-V-07649,WH-SGI-V-…	WH-SGI-V-07049,WH-SGI-V-07050,WH-SGI-V-07051,WH-SGI-V-07054,WH-SGI-V-07055,WH-SGI-V-07057,WH-SGI-V-07058,WH-SGI-V-07059,WH-SGI-V-07060,WH-SGI-V-07061,WH-SGI-V-07062,WH-SGI-V-07064,WH-SGI-V-07065,WH-SGI-V-07066,WH-SGI-V-07067,WH-SGI-V-07068,WH-SGI-V-07069,WH-SGI-V-07070,WH-SGI-V-07074,WH-SGI-V-07165,WH-SGI-V-07166,WH-SGI-V-07167,WH-SGI-V-07168,WH-SGI-V-07169,WH-SGI-V-07170,WH-SGI-V-07171,WH-SGI-V-…
264468_T_C	0.406	0.924	4.32e-05	-7.47	2.12	2.11	6.82	-5.96	0.789	-0.629	1.55	-0.445	0.378	0.951	1.37	-2.38	NA	WH-SGI-V-07050,WH-SGI-V-07054,WH-SGI-V-07055,WH-SGI-V-07059,WH-SGI-V-07064,WH-SGI-V-07070,WH-SGI-V-07165,WH-SGI-V-07166,WH-SGI-V-07167,WH-SGI-V-07169,WH-SGI-V-07170,WH-SGI-V-07172,WH-SGI-V-07176,WH-SGI-V-07177,WH-SGI-V-07181,WH-SGI-V-07183,WH-SGI-V-07185,WH-SGI-V-07186,WH-SGI-V-07227,WH-SGI-V-07229,WH-SGI-V-07231,WH-SGI-V-07232,WH-SGI-V-07234,WH-SGI-V-07239,WH-SGI-V-07241,WH-SGI-V-07243,WH-SGI-V-…	WH-SGI-V-07049,WH-SGI-V-07051,WH-SGI-V-07053,WH-SGI-V-07056,WH-SGI-V-07057,WH-SGI-V-07058,WH-SGI-V-07060,WH-SGI-V-07061,WH-SGI-V-07062,WH-SGI-V-07063,WH-SGI-V-07065,WH-SGI-V-07066,WH-SGI-V-07067,WH-SGI-V-07068,WH-SGI-V-07069,WH-SGI-V-07071,WH-SGI-V-07073,WH-SGI-V-07074,WH-SGI-V-07168,WH-SGI-V-07171,WH-SGI-V-07173,WH-SGI-V-07174,WH-SGI-V-07175,WH-SGI-V-07178,WH-SGI-V-07179,WH-SGI-V-07180,WH-SGI-V-…
2738944_T_C	0.55	0.0348	4.35e-05	1.74	0.442	-1.86	2.77	0.951	0.597	0.715	1.38	-0.46	-1.33	-2.19	0.589	-1.66	MDS2	WH-SGI-V-07049,WH-SGI-V-07050,WH-SGI-V-07053,WH-SGI-V-07054,WH-SGI-V-07056,WH-SGI-V-07058,WH-SGI-V-07059,WH-SGI-V-07060,WH-SGI-V-07063,WH-SGI-V-07066,WH-SGI-V-07067,WH-SGI-V-07069,WH-SGI-V-07070,WH-SGI-V-07074,WH-SGI-V-07166,WH-SGI-V-07167,WH-SGI-V-07169,WH-SGI-V-07170,WH-SGI-V-07172,WH-SGI-V-07176,WH-SGI-V-07177,WH-SGI-V-07181,WH-SGI-V-07183,WH-SGI-V-07185,WH-SGI-V-07186,WH-SGI-V-07188,WH-SGI-V-…	WH-SGI-V-07051,WH-SGI-V-07055,WH-SGI-V-07057,WH-SGI-V-07061,WH-SGI-V-07062,WH-SGI-V-07064,WH-SGI-V-07065,WH-SGI-V-07068,WH-SGI-V-07071,WH-SGI-V-07073,WH-SGI-V-07165,WH-SGI-V-07168,WH-SGI-V-07171,WH-SGI-V-07173,WH-SGI-V-07174,WH-SGI-V-07175,WH-SGI-V-07178,WH-SGI-V-07179,WH-SGI-V-07180,WH-SGI-V-07182,WH-SGI-V-07184,WH-SGI-V-07187,WH-SGI-V-07221,WH-SGI-V-07222,WH-SGI-V-07223,WH-SGI-V-07224,WH-SGI-V-…
547610A_G	0.403	0.063	4.68e-05	-2.17	0.641	-0.0649	3.2	-0.936	1.48	-1.13	1.11	1.51	0.0832	-0.206	-0.161	-1.67	MDS2	WH-SGI-V-07050,WH-SGI-V-07054,WH-SGI-V-07055,WH-SGI-V-07059,WH-SGI-V-07064,WH-SGI-V-07070,WH-SGI-V-07074,WH-SGI-V-07165,WH-SGI-V-07166,WH-SGI-V-07167,WH-SGI-V-07169,WH-SGI-V-07172,WH-SGI-V-07178,WH-SGI-V-07181,WH-SGI-V-07183,WH-SGI-V-07185,WH-SGI-V-07227,WH-SGI-V-07229,WH-SGI-V-07231,WH-SGI-V-07232,WH-SGI-V-07233,WH-SGI-V-07234,WH-SGI-V-07236,WH-SGI-V-07238,WH-SGI-V-07239,WH-SGI-V-07241,WH-SGI-V-…	WH-SGI-V-07049,WH-SGI-V-07051,WH-SGI-V-07053,WH-SGI-V-07056,WH-SGI-V-07057,WH-SGI-V-07058,WH-SGI-V-07060,WH-SGI-V-07061,WH-SGI-V-07062,WH-SGI-V-07063,WH-SGI-V-07065,WH-SGI-V-07066,WH-SGI-V-07067,WH-SGI-V-07068,WH-SGI-V-07069,WH-SGI-V-07071,WH-SGI-V-07073,WH-SGI-V-07168,WH-SGI-V-07170,WH-SGI-V-07171,WH-SGI-V-07173,WH-SGI-V-07174,WH-SGI-V-07175,WH-SGI-V-07176,WH-SGI-V-07177,WH-SGI-V-07179,WH-SGI-V-…
4166516_T_C	0.374	0.343	5.05e-05	-7.39	2.12	1.84	-0.715	-5.9	0.854	-0.738	1.63	-0.585	0.386	1	1.43	-2.37	NA	WH-SGI-V-07050,WH-SGI-V-07054,WH-SGI-V-07059,WH-SGI-V-07067,WH-SGI-V-07070,WH-SGI-V-07166,WH-SGI-V-07167,WH-SGI-V-07169,WH-SGI-V-07170,WH-SGI-V-07172,WH-SGI-V-07176,WH-SGI-V-07177,WH-SGI-V-07181,WH-SGI-V-07183,WH-SGI-V-07185,WH-SGI-V-07186,WH-SGI-V-07227,WH-SGI-V-07229,WH-SGI-V-07231,WH-SGI-V-07232,WH-SGI-V-07239,WH-SGI-V-07241,WH-SGI-V-07243,WH-SGI-V-07247,WH-SGI-V-07248,WH-SGI-V-07251,WH-SGI-V-…	WH-SGI-V-07049,WH-SGI-V-07051,WH-SGI-V-07053,WH-SGI-V-07055,WH-SGI-V-07056,WH-SGI-V-07057,WH-SGI-V-07058,WH-SGI-V-07060,WH-SGI-V-07061,WH-SGI-V-07062,WH-SGI-V-07063,WH-SGI-V-07064,WH-SGI-V-07065,WH-SGI-V-07066,WH-SGI-V-07068,WH-SGI-V-07069,WH-SGI-V-07071,WH-SGI-V-07073,WH-SGI-V-07074,WH-SGI-V-07165,WH-SGI-V-07168,WH-SGI-V-07171,WH-SGI-V-07173,WH-SGI-V-07174,WH-SGI-V-07175,WH-SGI-V-07178,WH-SGI-V-…
1178034_G_A	0.205	0.0982	5.26e-05	1.92	0.492	-1.26	2.34	-0.623	1.99	0.834	-0.223	1.1	-0.656	-0.56	-0.00762	-1.59	MDS6	WH-SGI-V-07049,WH-SGI-V-07051,WH-SGI-V-07053,WH-SGI-V-07056,WH-SGI-V-07058,WH-SGI-V-07061,WH-SGI-V-07062,WH-SGI-V-07063,WH-SGI-V-07065,WH-SGI-V-07069,WH-SGI-V-07168,WH-SGI-V-07171,WH-SGI-V-07173,WH-SGI-V-07174,WH-SGI-V-07175,WH-SGI-V-07178,WH-SGI-V-07180,WH-SGI-V-07188,WH-SGI-V-07221,WH-SGI-V-07225,WH-SGI-V-07233,WH-SGI-V-07256,WH-SGI-V-07259,WH-SGI-V-07266,WH-SGI-V-07282,WH-SGI-V-07283,WH-SGI-V-…	WH-SGI-V-07050,WH-SGI-V-07054,WH-SGI-V-07055,WH-SGI-V-07057,WH-SGI-V-07059,WH-SGI-V-07060,WH-SGI-V-07064,WH-SGI-V-07066,WH-SGI-V-07067,WH-SGI-V-07068,WH-SGI-V-07070,WH-SGI-V-07071,WH-SGI-V-07073,WH-SGI-V-07074,WH-SGI-V-07165,WH-SGI-V-07166,WH-SGI-V-07167,WH-SGI-V-07169,WH-SGI-V-07170,WH-SGI-V-07172,WH-SGI-V-07176,WH-SGI-V-07177,WH-SGI-V-07179,WH-SGI-V-07181,WH-SGI-V-07182,WH-SGI-V-07183,WH-SGI-V-…
4569593_G_A	0.054	2.88e-05	5.29e-05	2.44	0.687	-0.993	1.92	-0.182	0.81	0.551	1.02	-0.123	-0.692	-0.807	0.0283	-1.61	MDS3	WH-SGI-V-07049,WH-SGI-V-07179,WH-SGI-V-07225,WH-SGI-V-07236,WH-SGI-V-07266,WH-SGI-V-07283,WH-SGI-V-07410,WH-SGI-V-07484,WH-SGI-V-07501,WH-SGI-V-07508,WH-SGI-V-07635,WH-SGI-V-07643,WH-SGI-V-07650,WH-SGI-V-07692,WH-SGI-V-07704	WH-SGI-V-07050,WH-SGI-V-07051,WH-SGI-V-07053,WH-SGI-V-07054,WH-SGI-V-07055,WH-SGI-V-07056,WH-SGI-V-07057,WH-SGI-V-07058,WH-SGI-V-07059,WH-SGI-V-07060,WH-SGI-V-07061,WH-SGI-V-07062,WH-SGI-V-07063,WH-SGI-V-07064,WH-SGI-V-07065,WH-SGI-V-07066,WH-SGI-V-07067,WH-SGI-V-07068,WH-SGI-V-07069,WH-SGI-V-07070,WH-SGI-V-07071,WH-SGI-V-07073,WH-SGI-V-07074,WH-SGI-V-07165,WH-SGI-V-07166,WH-SGI-V-07167,WH-SGI-V-…
6199638_T_C	0.388	0.124	5.71e-05	-4.16	1.52	0.687	0.316	-3.22	0.987	-0.0769	1.4	-0.502	-0.205	-0.221	0.899	-1.89	MDS2	WH-SGI-V-07050,WH-SGI-V-07054,WH-SGI-V-07059,WH-SGI-V-07070,WH-SGI-V-07166,WH-SGI-V-07167,WH-SGI-V-07169,WH-SGI-V-07170,WH-SGI-V-07172,WH-SGI-V-07176,WH-SGI-V-07177,WH-SGI-V-07181,WH-SGI-V-07183,WH-SGI-V-07185,WH-SGI-V-07186,WH-SGI-V-07227,WH-SGI-V-07229,WH-SGI-V-07231,WH-SGI-V-07232,WH-SGI-V-07239,WH-SGI-V-07241,WH-SGI-V-07243,WH-SGI-V-07247,WH-SGI-V-07248,WH-SGI-V-07251,WH-SGI-V-07252,WH-SGI-V-…	WH-SGI-V-07049,WH-SGI-V-07051,WH-SGI-V-07053,WH-SGI-V-07055,WH-SGI-V-07056,WH-SGI-V-07057,WH-SGI-V-07058,WH-SGI-V-07060,WH-SGI-V-07061,WH-SGI-V-07062,WH-SGI-V-07063,WH-SGI-V-07064,WH-SGI-V-07065,WH-SGI-V-07066,WH-SGI-V-07067,WH-SGI-V-07068,WH-SGI-V-07069,WH-SGI-V-07071,WH-SGI-V-07073,WH-SGI-V-07074,WH-SGI-V-07165,WH-SGI-V-07168,WH-SGI-V-07171,WH-SGI-V-07173,WH-SGI-V-07174,WH-SGI-V-07175,WH-SGI-V-…
385458_T_C	0.406	0.924	6.08e-05	-7.26	2.09	2.03	6.64	-5.79	0.8	-0.626	1.53	-0.468	0.38	0.835	1.41	-2.31	MDS2	WH-SGI-V-07050,WH-SGI-V-07054,WH-SGI-V-07055,WH-SGI-V-07059,WH-SGI-V-07064,WH-SGI-V-07070,WH-SGI-V-07165,WH-SGI-V-07166,WH-SGI-V-07167,WH-SGI-V-07169,WH-SGI-V-07170,WH-SGI-V-07172,WH-SGI-V-07176,WH-SGI-V-07177,WH-SGI-V-07181,WH-SGI-V-07183,WH-SGI-V-07185,WH-SGI-V-07186,WH-SGI-V-07227,WH-SGI-V-07229,WH-SGI-V-07231,WH-SGI-V-07232,WH-SGI-V-07234,WH-SGI-V-07239,WH-SGI-V-07241,WH-SGI-V-07243,WH-SGI-V-…	WH-SGI-V-07049,WH-SGI-V-07051,WH-SGI-V-07053,WH-SGI-V-07056,WH-SGI-V-07057,WH-SGI-V-07058,WH-SGI-V-07060,WH-SGI-V-07061,WH-SGI-V-07062,WH-SGI-V-07063,WH-SGI-V-07065,WH-SGI-V-07066,WH-SGI-V-07067,WH-SGI-V-07068,WH-SGI-V-07069,WH-SGI-V-07071,WH-SGI-V-07073,WH-SGI-V-07074,WH-SGI-V-07168,WH-SGI-V-07171,WH-SGI-V-07173,WH-SGI-V-07174,WH-SGI-V-07175,WH-SGI-V-07178,WH-SGI-V-07179,WH-SGI-V-07180,WH-SGI-V-…
469992G_T	0.0504	0.159	6.19e-05	-4.42	1.64	-0.743	3.94	0.0751	1.41	0.902	1.69	-0.161	-1.21	-1.66	0.0315	-1.1	MDS8	WH-SGI-V-07165,WH-SGI-V-07178,WH-SGI-V-07184,WH-SGI-V-07261,WH-SGI-V-07287,WH-SGI-V-07290,WH-SGI-V-07311,WH-SGI-V-07409,WH-SGI-V-07417,WH-SGI-V-07489,WH-SGI-V-07502,WH-SGI-V-07640,WH-SGI-V-07705,WH-SGI-V-07707	WH-SGI-V-07049,WH-SGI-V-07050,WH-SGI-V-07051,WH-SGI-V-07053,WH-SGI-V-07054,WH-SGI-V-07055,WH-SGI-V-07056,WH-SGI-V-07057,WH-SGI-V-07058,WH-SGI-V-07059,WH-SGI-V-07060,WH-SGI-V-07061,WH-SGI-V-07062,WH-SGI-V-07063,WH-SGI-V-07064,WH-SGI-V-07065,WH-SGI-V-07066,WH-SGI-V-07067,WH-SGI-V-07068,WH-SGI-V-07069,WH-SGI-V-07070,WH-SGI-V-07071,WH-SGI-V-07073,WH-SGI-V-07074,WH-SGI-V-07166,WH-SGI-V-07167,WH-SGI-V-…
1520338_G_T	0.536	5.04e-05	6.26e-05	-1.75	0.47	0.0117	0.895	-0.767	0.0595	0.349	1.33	-1.33	-0.602	0.0112	-0.934	-1.44	MDS3	WH-SGI-V-07050,WH-SGI-V-07051,WH-SGI-V-07054,WH-SGI-V-07059,WH-SGI-V-07065,WH-SGI-V-07067,WH-SGI-V-07070,WH-SGI-V-07166,WH-SGI-V-07167,WH-SGI-V-07168,WH-SGI-V-07169,WH-SGI-V-07170,WH-SGI-V-07171,WH-SGI-V-07172,WH-SGI-V-07173,WH-SGI-V-07174,WH-SGI-V-07175,WH-SGI-V-07176,WH-SGI-V-07177,WH-SGI-V-07178,WH-SGI-V-07180,WH-SGI-V-07183,WH-SGI-V-07185,WH-SGI-V-07186,WH-SGI-V-07221,WH-SGI-V-07222,WH-SGI-V-…	WH-SGI-V-07049,WH-SGI-V-07053,WH-SGI-V-07055,WH-SGI-V-07056,WH-SGI-V-07057,WH-SGI-V-07058,WH-SGI-V-07060,WH-SGI-V-07061,WH-SGI-V-07062,WH-SGI-V-07063,WH-SGI-V-07064,WH-SGI-V-07066,WH-SGI-V-07068,WH-SGI-V-07069,WH-SGI-V-07071,WH-SGI-V-07073,WH-SGI-V-07074,WH-SGI-V-07165,WH-SGI-V-07179,WH-SGI-V-07181,WH-SGI-V-07182,WH-SGI-V-07184,WH-SGI-V-07187,WH-SGI-V-07188,WH-SGI-V-07224,WH-SGI-V-07225,WH-SGI-V-…
2523986_T_C	0.45	0.00384	7.04e-05	-1.37	0.361	-0.279	1.3	-0.428	1.43	0.969	1.09	-1.28	-0.844	0.0975	-0.415	-1.06	MDS2	WH-SGI-V-07049,WH-SGI-V-07050,WH-SGI-V-07051,WH-SGI-V-07059,WH-SGI-V-07060,WH-SGI-V-07067,WH-SGI-V-07071,WH-SGI-V-07073,WH-SGI-V-07074,WH-SGI-V-07167,WH-SGI-V-07170,WH-SGI-V-07176,WH-SGI-V-07177,WH-SGI-V-07183,WH-SGI-V-07185,WH-SGI-V-07186,WH-SGI-V-07187,WH-SGI-V-07222,WH-SGI-V-07223,WH-SGI-V-07229,WH-SGI-V-07235,WH-SGI-V-07236,WH-SGI-V-07239,WH-SGI-V-07240,WH-SGI-V-07241,WH-SGI-V-07242,WH-SGI-V-…	WH-SGI-V-07053,WH-SGI-V-07054,WH-SGI-V-07055,WH-SGI-V-07056,WH-SGI-V-07057,WH-SGI-V-07058,WH-SGI-V-07061,WH-SGI-V-07062,WH-SGI-V-07063,WH-SGI-V-07064,WH-SGI-V-07065,WH-SGI-V-07066,WH-SGI-V-07068,WH-SGI-V-07069,WH-SGI-V-07070,WH-SGI-V-07165,WH-SGI-V-07166,WH-SGI-V-07168,WH-SGI-V-07169,WH-SGI-V-07171,WH-SGI-V-07172,WH-SGI-V-07173,WH-SGI-V-07174,WH-SGI-V-07175,WH-SGI-V-07178,WH-SGI-V-07179,WH-SGI-V-…
2459305_G_A	0.054	2.88e-05	7.27e-05	2.52	0.723	-1	1.95	0.151	0.945	1.08	0.597	-0.379	-0.219	-0.852	-0.291	-1.23	MDS5	WH-SGI-V-07166,WH-SGI-V-07225,WH-SGI-V-07283,WH-SGI-V-07380,WH-SGI-V-07407,WH-SGI-V-07408,WH-SGI-V-07410,WH-SGI-V-07426,WH-SGI-V-07428,WH-SGI-V-07507,WH-SGI-V-07631,WH-SGI-V-07632,WH-SGI-V-07647,WH-SGI-V-07682,WH-SGI-V-07698	WH-SGI-V-07049,WH-SGI-V-07050,WH-SGI-V-07051,WH-SGI-V-07053,WH-SGI-V-07054,WH-SGI-V-07055,WH-SGI-V-07056,WH-SGI-V-07057,WH-SGI-V-07058,WH-SGI-V-07059,WH-SGI-V-07060,WH-SGI-V-07061,WH-SGI-V-07062,WH-SGI-V-07063,WH-SGI-V-07064,WH-SGI-V-07065,WH-SGI-V-07066,WH-SGI-V-07067,WH-SGI-V-07068,WH-SGI-V-07069,WH-SGI-V-07070,WH-SGI-V-07071,WH-SGI-V-07073,WH-SGI-V-07074,WH-SGI-V-07165,WH-SGI-V-07167,WH-SGI-V-…
2274037_C_T	0.129	0.000177	7.44e-05	1.62	0.416	-1.1	2.07	-0.26	0.719	0.549	1.02	-0.113	-0.918	-0.956	0.0714	-1.83	MDS10	WH-SGI-V-07049,WH-SGI-V-07056,WH-SGI-V-07058,WH-SGI-V-07060,WH-SGI-V-07063,WH-SGI-V-07065,WH-SGI-V-07066,WH-SGI-V-07070,WH-SGI-V-07184,WH-SGI-V-07188,WH-SGI-V-07225,WH-SGI-V-07233,WH-SGI-V-07238,WH-SGI-V-07249,WH-SGI-V-07281,WH-SGI-V-07282,WH-SGI-V-07283,WH-SGI-V-07310,WH-SGI-V-07314,WH-SGI-V-07375,WH-SGI-V-07411,WH-SGI-V-07412,WH-SGI-V-07419,WH-SGI-V-07428,WH-SGI-V-07484,WH-SGI-V-07488,WH-SGI-V-…	WH-SGI-V-07050,WH-SGI-V-07051,WH-SGI-V-07053,WH-SGI-V-07054,WH-SGI-V-07055,WH-SGI-V-07057,WH-SGI-V-07059,WH-SGI-V-07061,WH-SGI-V-07062,WH-SGI-V-07064,WH-SGI-V-07067,WH-SGI-V-07068,WH-SGI-V-07069,WH-SGI-V-07071,WH-SGI-V-07073,WH-SGI-V-07074,WH-SGI-V-07165,WH-SGI-V-07166,WH-SGI-V-07167,WH-SGI-V-07168,WH-SGI-V-07169,WH-SGI-V-07170,WH-SGI-V-07171,WH-SGI-V-07172,WH-SGI-V-07173,WH-SGI-V-07174,WH-SGI-V-…
5657548_G_A	0.403	0.036	7.83e-05	1.52	0.409	-1.52	2.5	-0.793	1.28	0.63	0.229	0.239	-0.847	-1.3	0.62	-1.77	MDS2	WH-SGI-V-07049,WH-SGI-V-07051,WH-SGI-V-07053,WH-SGI-V-07056,WH-SGI-V-07058,WH-SGI-V-07060,WH-SGI-V-07061,WH-SGI-V-07062,WH-SGI-V-07063,WH-SGI-V-07065,WH-SGI-V-07066,WH-SGI-V-07067,WH-SGI-V-07070,WH-SGI-V-07071,WH-SGI-V-07073,WH-SGI-V-07166,WH-SGI-V-07168,WH-SGI-V-07171,WH-SGI-V-07173,WH-SGI-V-07174,WH-SGI-V-07175,WH-SGI-V-07179,WH-SGI-V-07180,WH-SGI-V-07181,WH-SGI-V-07184,WH-SGI-V-07187,WH-SGI-V-…	WH-SGI-V-07050,WH-SGI-V-07054,WH-SGI-V-07055,WH-SGI-V-07057,WH-SGI-V-07059,WH-SGI-V-07064,WH-SGI-V-07068,WH-SGI-V-07069,WH-SGI-V-07074,WH-SGI-V-07165,WH-SGI-V-07167,WH-SGI-V-07169,WH-SGI-V-07170,WH-SGI-V-07172,WH-SGI-V-07176,WH-SGI-V-07177,WH-SGI-V-07178,WH-SGI-V-07182,WH-SGI-V-07183,WH-SGI-V-07185,WH-SGI-V-07186,WH-SGI-V-07222,WH-SGI-V-07223,WH-SGI-V-07224,WH-SGI-V-07227,WH-SGI-V-07229,WH-SGI-V-…
1150969_C_G	0.371	0.0134	8.32e-05	-1.54	0.414	-0.329	1.32	-0.000862	1.41	0.363	0.0301	1.4	-0.594	-2.39	0.149	-2.47	MDS10	WH-SGI-V-07051,WH-SGI-V-07054,WH-SGI-V-07057,WH-SGI-V-07067,WH-SGI-V-07074,WH-SGI-V-07167,WH-SGI-V-07169,WH-SGI-V-07178,WH-SGI-V-07181,WH-SGI-V-07224,WH-SGI-V-07229,WH-SGI-V-07232,WH-SGI-V-07237,WH-SGI-V-07238,WH-SGI-V-07240,WH-SGI-V-07242,WH-SGI-V-07243,WH-SGI-V-07244,WH-SGI-V-07245,WH-SGI-V-07246,WH-SGI-V-07249,WH-SGI-V-07250,WH-SGI-V-07253,WH-SGI-V-07254,WH-SGI-V-07267,WH-SGI-V-07272,WH-SGI-V-…	WH-SGI-V-07049,WH-SGI-V-07050,WH-SGI-V-07053,WH-SGI-V-07055,WH-SGI-V-07056,WH-SGI-V-07058,WH-SGI-V-07059,WH-SGI-V-07060,WH-SGI-V-07061,WH-SGI-V-07062,WH-SGI-V-07063,WH-SGI-V-07064,WH-SGI-V-07065,WH-SGI-V-07066,WH-SGI-V-07068,WH-SGI-V-07069,WH-SGI-V-07070,WH-SGI-V-07071,WH-SGI-V-07073,WH-SGI-V-07165,WH-SGI-V-07166,WH-SGI-V-07168,WH-SGI-V-07170,WH-SGI-V-07171,WH-SGI-V-07172,WH-SGI-V-07173,WH-SGI-V-…
161464_T_C	0.41	0.859	8.34e-05	-6.72	2.02	1.82	6.33	-5.36	0.812	-0.492	1.51	-0.21	0.236	0.87	1.3	-2.25	MDS2	WH-SGI-V-07050,WH-SGI-V-07054,WH-SGI-V-07055,WH-SGI-V-07059,WH-SGI-V-07064,WH-SGI-V-07070,WH-SGI-V-07165,WH-SGI-V-07166,WH-SGI-V-07167,WH-SGI-V-07169,WH-SGI-V-07170,WH-SGI-V-07172,WH-SGI-V-07176,WH-SGI-V-07177,WH-SGI-V-07181,WH-SGI-V-07183,WH-SGI-V-07185,WH-SGI-V-07186,WH-SGI-V-07227,WH-SGI-V-07229,WH-SGI-V-07231,WH-SGI-V-07232,WH-SGI-V-07234,WH-SGI-V-07238,WH-SGI-V-07239,WH-SGI-V-07241,WH-SGI-V-…	WH-SGI-V-07049,WH-SGI-V-07051,WH-SGI-V-07053,WH-SGI-V-07056,WH-SGI-V-07057,WH-SGI-V-07058,WH-SGI-V-07060,WH-SGI-V-07061,WH-SGI-V-07062,WH-SGI-V-07063,WH-SGI-V-07065,WH-SGI-V-07066,WH-SGI-V-07067,WH-SGI-V-07068,WH-SGI-V-07069,WH-SGI-V-07071,WH-SGI-V-07073,WH-SGI-V-07074,WH-SGI-V-07168,WH-SGI-V-07171,WH-SGI-V-07173,WH-SGI-V-07174,WH-SGI-V-07175,WH-SGI-V-07178,WH-SGI-V-07179,WH-SGI-V-07180,WH-SGI-V-…
547622A_G	0.399	0.0752	8.7e-05	-2.12	0.649	-0.0859	3.16	-0.926	1.46	-1.13	1.06	1.38	0.119	-0.333	-0.139	-1.64	MDS2	WH-SGI-V-07050,WH-SGI-V-07054,WH-SGI-V-07055,WH-SGI-V-07059,WH-SGI-V-07064,WH-SGI-V-07070,WH-SGI-V-07074,WH-SGI-V-07165,WH-SGI-V-07166,WH-SGI-V-07167,WH-SGI-V-07169,WH-SGI-V-07172,WH-SGI-V-07178,WH-SGI-V-07181,WH-SGI-V-07183,WH-SGI-V-07185,WH-SGI-V-07227,WH-SGI-V-07229,WH-SGI-V-07231,WH-SGI-V-07232,WH-SGI-V-07233,WH-SGI-V-07234,WH-SGI-V-07236,WH-SGI-V-07238,WH-SGI-V-07239,WH-SGI-V-07241,WH-SGI-V-…	WH-SGI-V-07049,WH-SGI-V-07051,WH-SGI-V-07053,WH-SGI-V-07056,WH-SGI-V-07057,WH-SGI-V-07058,WH-SGI-V-07060,WH-SGI-V-07061,WH-SGI-V-07062,WH-SGI-V-07063,WH-SGI-V-07065,WH-SGI-V-07066,WH-SGI-V-07067,WH-SGI-V-07068,WH-SGI-V-07069,WH-SGI-V-07071,WH-SGI-V-07073,WH-SGI-V-07168,WH-SGI-V-07170,WH-SGI-V-07171,WH-SGI-V-07173,WH-SGI-V-07174,WH-SGI-V-07175,WH-SGI-V-07176,WH-SGI-V-07177,WH-SGI-V-07179,WH-SGI-V-…
4931363_G_C	0.306	0.465	8.96e-05	-4.49	1.38	0.452	5.15	-2.29	1.52	-3.24	1.81	2.8	0.923	-0.155	0.663	-2.04	MDS2	WH-SGI-V-07050,WH-SGI-V-07051,WH-SGI-V-07054,WH-SGI-V-07055,WH-SGI-V-07059,WH-SGI-V-07064,WH-SGI-V-07070,WH-SGI-V-07165,WH-SGI-V-07166,WH-SGI-V-07167,WH-SGI-V-07169,WH-SGI-V-07172,WH-SGI-V-07181,WH-SGI-V-07183,WH-SGI-V-07185,WH-SGI-V-07227,WH-SGI-V-07228,WH-SGI-V-07229,WH-SGI-V-07231,WH-SGI-V-07232,WH-SGI-V-07234,WH-SGI-V-07239,WH-SGI-V-07241,WH-SGI-V-07243,WH-SGI-V-07248,WH-SGI-V-07251,WH-SGI-V-…	WH-SGI-V-07049,WH-SGI-V-07053,WH-SGI-V-07056,WH-SGI-V-07057,WH-SGI-V-07058,WH-SGI-V-07060,WH-SGI-V-07061,WH-SGI-V-07062,WH-SGI-V-07063,WH-SGI-V-07065,WH-SGI-V-07066,WH-SGI-V-07067,WH-SGI-V-07068,WH-SGI-V-07069,WH-SGI-V-07071,WH-SGI-V-07073,WH-SGI-V-07074,WH-SGI-V-07168,WH-SGI-V-07170,WH-SGI-V-07171,WH-SGI-V-07173,WH-SGI-V-07174,WH-SGI-V-07175,WH-SGI-V-07176,WH-SGI-V-07177,WH-SGI-V-07178,WH-SGI-V-…
3489180_T_C	0.108	0.00207	9e-05	-2.56	0.834	-0.666	1.58	0.11	1.39	0.358	0.369	-0.645	-0.659	0.508	-0.771	-1.65	MDS9	WH-SGI-V-07050,WH-SGI-V-07059,WH-SGI-V-07074,WH-SGI-V-07166,WH-SGI-V-07183,WH-SGI-V-07185,WH-SGI-V-07228,WH-SGI-V-07238,WH-SGI-V-07242,WH-SGI-V-07250,WH-SGI-V-07260,WH-SGI-V-07265,WH-SGI-V-07290,WH-SGI-V-07291,WH-SGI-V-07311,WH-SGI-V-07316,WH-SGI-V-07386,WH-SGI-V-07409,WH-SGI-V-07414,WH-SGI-V-07417,WH-SGI-V-07423,WH-SGI-V-07424,WH-SGI-V-07427,WH-SGI-V-07499,WH-SGI-V-07502,WH-SGI-V-07621,WH-SGI-V-…	WH-SGI-V-07049,WH-SGI-V-07051,WH-SGI-V-07053,WH-SGI-V-07054,WH-SGI-V-07055,WH-SGI-V-07056,WH-SGI-V-07057,WH-SGI-V-07058,WH-SGI-V-07060,WH-SGI-V-07061,WH-SGI-V-07062,WH-SGI-V-07063,WH-SGI-V-07064,WH-SGI-V-07065,WH-SGI-V-07066,WH-SGI-V-07067,WH-SGI-V-07068,WH-SGI-V-07069,WH-SGI-V-07070,WH-SGI-V-07071,WH-SGI-V-07073,WH-SGI-V-07165,WH-SGI-V-07167,WH-SGI-V-07168,WH-SGI-V-07169,WH-SGI-V-07170,WH-SGI-V-…
1095962_C_T	0.104	0.0846	9.28e-05	-2.63	0.767	-0.65	1.59	0.346	1.43	0.76	0.316	-0.0424	-1.73	-2.91	1.22	-2.35	MDS8	WH-SGI-V-07057,WH-SGI-V-07178,WH-SGI-V-07224,WH-SGI-V-07229,WH-SGI-V-07237,WH-SGI-V-07244,WH-SGI-V-07246,WH-SGI-V-07254,WH-SGI-V-07267,WH-SGI-V-07279,WH-SGI-V-07290,WH-SGI-V-07311,WH-SGI-V-07316,WH-SGI-V-07371,WH-SGI-V-07373,WH-SGI-V-07388,WH-SGI-V-07389,WH-SGI-V-07390,WH-SGI-V-07404,WH-SGI-V-07405,WH-SGI-V-07409,WH-SGI-V-07417,WH-SGI-V-07489,WH-SGI-V-07502,WH-SGI-V-07640,WH-SGI-V-07699,WH-SGI-V-…	WH-SGI-V-07049,WH-SGI-V-07050,WH-SGI-V-07051,WH-SGI-V-07053,WH-SGI-V-07054,WH-SGI-V-07055,WH-SGI-V-07056,WH-SGI-V-07058,WH-SGI-V-07059,WH-SGI-V-07060,WH-SGI-V-07061,WH-SGI-V-07062,WH-SGI-V-07063,WH-SGI-V-07064,WH-SGI-V-07065,WH-SGI-V-07066,WH-SGI-V-07067,WH-SGI-V-07068,WH-SGI-V-07069,WH-SGI-V-07070,WH-SGI-V-07071,WH-SGI-V-07073,WH-SGI-V-07074,WH-SGI-V-07165,WH-SGI-V-07166,WH-SGI-V-07167,WH-SGI-V-…
4519490_A_G	0.309	0.415	9.28e-05	-3.94	1.21	0.284	4.01	-2.01	1.58	-2.64	2.55	2.71	0.719	-0.318	0.442	-2.06	MDS2	WH-SGI-V-07050,WH-SGI-V-07054,WH-SGI-V-07059,WH-SGI-V-07064,WH-SGI-V-07065,WH-SGI-V-07070,WH-SGI-V-07165,WH-SGI-V-07166,WH-SGI-V-07167,WH-SGI-V-07169,WH-SGI-V-07172,WH-SGI-V-07181,WH-SGI-V-07183,WH-SGI-V-07185,WH-SGI-V-07227,WH-SGI-V-07229,WH-SGI-V-07231,WH-SGI-V-07232,WH-SGI-V-07234,WH-SGI-V-07239,WH-SGI-V-07241,WH-SGI-V-07243,WH-SGI-V-07248,WH-SGI-V-07251,WH-SGI-V-07252,WH-SGI-V-07255,WH-SGI-V-…	WH-SGI-V-07049,WH-SGI-V-07051,WH-SGI-V-07053,WH-SGI-V-07055,WH-SGI-V-07056,WH-SGI-V-07057,WH-SGI-V-07058,WH-SGI-V-07060,WH-SGI-V-07061,WH-SGI-V-07062,WH-SGI-V-07063,WH-SGI-V-07066,WH-SGI-V-07067,WH-SGI-V-07068,WH-SGI-V-07069,WH-SGI-V-07071,WH-SGI-V-07073,WH-SGI-V-07074,WH-SGI-V-07168,WH-SGI-V-07170,WH-SGI-V-07171,WH-SGI-V-07173,WH-SGI-V-07174,WH-SGI-V-07175,WH-SGI-V-07176,WH-SGI-V-07177,WH-SGI-V-…
161169_A_G	0.374	0.343	9.28e-05	-6.86	2.06	1.64	-0.49	-5.48	0.846	-0.613	1.65	-0.393	0.222	0.983	1.33	-2.33	MDS2	WH-SGI-V-07050,WH-SGI-V-07054,WH-SGI-V-07059,WH-SGI-V-07070,WH-SGI-V-07166,WH-SGI-V-07167,WH-SGI-V-07169,WH-SGI-V-07170,WH-SGI-V-07172,WH-SGI-V-07176,WH-SGI-V-07177,WH-SGI-V-07181,WH-SGI-V-07183,WH-SGI-V-07185,WH-SGI-V-07186,WH-SGI-V-07227,WH-SGI-V-07229,WH-SGI-V-07231,WH-SGI-V-07232,WH-SGI-V-07239,WH-SGI-V-07241,WH-SGI-V-07243,WH-SGI-V-07247,WH-SGI-V-07248,WH-SGI-V-07251,WH-SGI-V-07252,WH-SGI-V-…	WH-SGI-V-07049,WH-SGI-V-07051,WH-SGI-V-07053,WH-SGI-V-07055,WH-SGI-V-07056,WH-SGI-V-07057,WH-SGI-V-07058,WH-SGI-V-07060,WH-SGI-V-07061,WH-SGI-V-07062,WH-SGI-V-07063,WH-SGI-V-07064,WH-SGI-V-07065,WH-SGI-V-07066,WH-SGI-V-07067,WH-SGI-V-07068,WH-SGI-V-07069,WH-SGI-V-07071,WH-SGI-V-07073,WH-SGI-V-07074,WH-SGI-V-07165,WH-SGI-V-07168,WH-SGI-V-07171,WH-SGI-V-07173,WH-SGI-V-07174,WH-SGI-V-07175,WH-SGI-V-…
2124779_T_C	0.248	0.023	9.37e-05	-1.99	0.574	-0.409	2.71	-0.671	1.12	-0.208	1.67	1.91	0.0309	-1.82	0.154	-1.36	MDS6	WH-SGI-V-07050,WH-SGI-V-07054,WH-SGI-V-07059,WH-SGI-V-07064,WH-SGI-V-07070,WH-SGI-V-07165,WH-SGI-V-07167,WH-SGI-V-07169,WH-SGI-V-07172,WH-SGI-V-07183,WH-SGI-V-07185,WH-SGI-V-07227,WH-SGI-V-07229,WH-SGI-V-07231,WH-SGI-V-07232,WH-SGI-V-07243,WH-SGI-V-07251,WH-SGI-V-07252,WH-SGI-V-07253,WH-SGI-V-07255,WH-SGI-V-07258,WH-SGI-V-07284,WH-SGI-V-07286,WH-SGI-V-07287,WH-SGI-V-07290,WH-SGI-V-07295,WH-SGI-V-…	WH-SGI-V-07049,WH-SGI-V-07051,WH-SGI-V-07053,WH-SGI-V-07055,WH-SGI-V-07056,WH-SGI-V-07057,WH-SGI-V-07058,WH-SGI-V-07060,WH-SGI-V-07061,WH-SGI-V-07062,WH-SGI-V-07063,WH-SGI-V-07065,WH-SGI-V-07066,WH-SGI-V-07067,WH-SGI-V-07068,WH-SGI-V-07069,WH-SGI-V-07071,WH-SGI-V-07073,WH-SGI-V-07074,WH-SGI-V-07166,WH-SGI-V-07168,WH-SGI-V-07170,WH-SGI-V-07171,WH-SGI-V-07173,WH-SGI-V-07174,WH-SGI-V-07175,WH-SGI-V-…
150110G_A	0.209	0.0292	0.000101	1.62	0.434	-1.23	2.25	0.347	0.906	1.5	0.875	-0.992	-0.948	-1.7	-0.0488	-2.14	MDS4	WH-SGI-V-07049,WH-SGI-V-07059,WH-SGI-V-07070,WH-SGI-V-07166,WH-SGI-V-07167,WH-SGI-V-07172,WH-SGI-V-07181,WH-SGI-V-07183,WH-SGI-V-07185,WH-SGI-V-07225,WH-SGI-V-07226,WH-SGI-V-07227,WH-SGI-V-07228,WH-SGI-V-07231,WH-SGI-V-07241,WH-SGI-V-07243,WH-SGI-V-07248,WH-SGI-V-07251,WH-SGI-V-07252,WH-SGI-V-07255,WH-SGI-V-07258,WH-SGI-V-07263,WH-SGI-V-07265,WH-SGI-V-07266,WH-SGI-V-07277,WH-SGI-V-07282,WH-SGI-V-…	WH-SGI-V-07050,WH-SGI-V-07051,WH-SGI-V-07053,WH-SGI-V-07054,WH-SGI-V-07055,WH-SGI-V-07056,WH-SGI-V-07057,WH-SGI-V-07058,WH-SGI-V-07060,WH-SGI-V-07061,WH-SGI-V-07062,WH-SGI-V-07063,WH-SGI-V-07064,WH-SGI-V-07065,WH-SGI-V-07066,WH-SGI-V-07067,WH-SGI-V-07068,WH-SGI-V-07069,WH-SGI-V-07071,WH-SGI-V-07073,WH-SGI-V-07074,WH-SGI-V-07165,WH-SGI-V-07168,WH-SGI-V-07169,WH-SGI-V-07170,WH-SGI-V-07171,WH-SGI-V-…
4286050_G_A	0.0576	0.000103	0.000107	2.22	0.622	-0.999	1.93	-0.169	0.856	0.575	0.99	-0.172	-0.789	-0.998	-0.0835	-1.69	MDS10	WH-SGI-V-07066,WH-SGI-V-07225,WH-SGI-V-07233,WH-SGI-V-07266,WH-SGI-V-07281,WH-SGI-V-07283,WH-SGI-V-07375,WH-SGI-V-07410,WH-SGI-V-07411,WH-SGI-V-07412,WH-SGI-V-07416,WH-SGI-V-07485,WH-SGI-V-07490,WH-SGI-V-07501,WH-SGI-V-07692,WH-SGI-V-07695	WH-SGI-V-07049,WH-SGI-V-07050,WH-SGI-V-07051,WH-SGI-V-07053,WH-SGI-V-07054,WH-SGI-V-07055,WH-SGI-V-07056,WH-SGI-V-07057,WH-SGI-V-07058,WH-SGI-V-07059,WH-SGI-V-07060,WH-SGI-V-07061,WH-SGI-V-07062,WH-SGI-V-07063,WH-SGI-V-07064,WH-SGI-V-07065,WH-SGI-V-07067,WH-SGI-V-07068,WH-SGI-V-07069,WH-SGI-V-07070,WH-SGI-V-07071,WH-SGI-V-07073,WH-SGI-V-07074,WH-SGI-V-07165,WH-SGI-V-07166,WH-SGI-V-07167,WH-SGI-V-…
1556106_C_G	0.198	0.00148	0.00011	1.49	0.396	-1.2	2.13	-0.37	0.635	0.454	1.08	-0.513	-0.93	-1.48	0.482	-1.98	MDS10	WH-SGI-V-07049,WH-SGI-V-07051,WH-SGI-V-07056,WH-SGI-V-07058,WH-SGI-V-07060,WH-SGI-V-07063,WH-SGI-V-07067,WH-SGI-V-07071,WH-SGI-V-07073,WH-SGI-V-07074,WH-SGI-V-07179,WH-SGI-V-07188,WH-SGI-V-07223,WH-SGI-V-07225,WH-SGI-V-07226,WH-SGI-V-07228,WH-SGI-V-07233,WH-SGI-V-07235,WH-SGI-V-07249,WH-SGI-V-07250,WH-SGI-V-07253,WH-SGI-V-07266,WH-SGI-V-07283,WH-SGI-V-07291,WH-SGI-V-07300,WH-SGI-V-07302,WH-SGI-V-…	WH-SGI-V-07050,WH-SGI-V-07053,WH-SGI-V-07054,WH-SGI-V-07055,WH-SGI-V-07057,WH-SGI-V-07059,WH-SGI-V-07061,WH-SGI-V-07062,WH-SGI-V-07064,WH-SGI-V-07065,WH-SGI-V-07066,WH-SGI-V-07068,WH-SGI-V-07069,WH-SGI-V-07070,WH-SGI-V-07165,WH-SGI-V-07166,WH-SGI-V-07167,WH-SGI-V-07168,WH-SGI-V-07169,WH-SGI-V-07170,WH-SGI-V-07171,WH-SGI-V-07172,WH-SGI-V-07173,WH-SGI-V-07174,WH-SGI-V-07175,WH-SGI-V-07176,WH-SGI-V-…
1515922_A_G	0.41	0.0541	0.000113	1.52	0.412	-1.53	2.53	0.107	0.475	1.46	1.48	-1.15	-1.4	-1.79	1.38	-1.75	MDS9	WH-SGI-V-07049,WH-SGI-V-07054,WH-SGI-V-07056,WH-SGI-V-07058,WH-SGI-V-07059,WH-SGI-V-07063,WH-SGI-V-07065,WH-SGI-V-07066,WH-SGI-V-07067,WH-SGI-V-07070,WH-SGI-V-07071,WH-SGI-V-07073,WH-SGI-V-07074,WH-SGI-V-07166,WH-SGI-V-07167,WH-SGI-V-07169,WH-SGI-V-07172,WH-SGI-V-07181,WH-SGI-V-07183,WH-SGI-V-07185,WH-SGI-V-07188,WH-SGI-V-07225,WH-SGI-V-07226,WH-SGI-V-07227,WH-SGI-V-07228,WH-SGI-V-07231,WH-SGI-V-…	WH-SGI-V-07050,WH-SGI-V-07051,WH-SGI-V-07053,WH-SGI-V-07055,WH-SGI-V-07057,WH-SGI-V-07060,WH-SGI-V-07061,WH-SGI-V-07062,WH-SGI-V-07064,WH-SGI-V-07068,WH-SGI-V-07069,WH-SGI-V-07165,WH-SGI-V-07168,WH-SGI-V-07170,WH-SGI-V-07171,WH-SGI-V-07173,WH-SGI-V-07174,WH-SGI-V-07175,WH-SGI-V-07176,WH-SGI-V-07177,WH-SGI-V-07178,WH-SGI-V-07179,WH-SGI-V-07180,WH-SGI-V-07182,WH-SGI-V-07184,WH-SGI-V-07186,WH-SGI-V-…
670945_C_T	0.169	0.0206	0.000113	-1.83	0.524	-0.611	2.05	0.325	1.46	0.824	0.275	0.211	-1.26	-1.51	0.381	-1.86	MDS3	WH-SGI-V-07053,WH-SGI-V-07057,WH-SGI-V-07074,WH-SGI-V-07224,WH-SGI-V-07237,WH-SGI-V-07238,WH-SGI-V-07242,WH-SGI-V-07244,WH-SGI-V-07246,WH-SGI-V-07250,WH-SGI-V-07254,WH-SGI-V-07267,WH-SGI-V-07287,WH-SGI-V-07290,WH-SGI-V-07300,WH-SGI-V-07311,WH-SGI-V-07312,WH-SGI-V-07371,WH-SGI-V-07375,WH-SGI-V-07386,WH-SGI-V-07388,WH-SGI-V-07389,WH-SGI-V-07390,WH-SGI-V-07404,WH-SGI-V-07409,WH-SGI-V-07411,WH-SGI-V-…	WH-SGI-V-07049,WH-SGI-V-07050,WH-SGI-V-07051,WH-SGI-V-07054,WH-SGI-V-07055,WH-SGI-V-07056,WH-SGI-V-07058,WH-SGI-V-07059,WH-SGI-V-07060,WH-SGI-V-07061,WH-SGI-V-07062,WH-SGI-V-07063,WH-SGI-V-07064,WH-SGI-V-07065,WH-SGI-V-07066,WH-SGI-V-07067,WH-SGI-V-07068,WH-SGI-V-07069,WH-SGI-V-07070,WH-SGI-V-07071,WH-SGI-V-07073,WH-SGI-V-07165,WH-SGI-V-07166,WH-SGI-V-07167,WH-SGI-V-07168,WH-SGI-V-07169,WH-SGI-V-…
160592G_T	0.371	0.000394	0.000115	-1.59	0.43	-0.319	1.13	0.733	0.482	0.506	0.524	-0.386	-1.1	-1.88	0.199	-1.54	MDS2	WH-SGI-V-07057,WH-SGI-V-07065,WH-SGI-V-07066,WH-SGI-V-07168,WH-SGI-V-07171,WH-SGI-V-07173,WH-SGI-V-07174,WH-SGI-V-07175,WH-SGI-V-07178,WH-SGI-V-07180,WH-SGI-V-07221,WH-SGI-V-07222,WH-SGI-V-07223,WH-SGI-V-07224,WH-SGI-V-07229,WH-SGI-V-07233,WH-SGI-V-07235,WH-SGI-V-07236,WH-SGI-V-07237,WH-SGI-V-07238,WH-SGI-V-07240,WH-SGI-V-07242,WH-SGI-V-07244,WH-SGI-V-07245,WH-SGI-V-07246,WH-SGI-V-07249,WH-SGI-V-…	WH-SGI-V-07049,WH-SGI-V-07050,WH-SGI-V-07051,WH-SGI-V-07053,WH-SGI-V-07054,WH-SGI-V-07055,WH-SGI-V-07056,WH-SGI-V-07058,WH-SGI-V-07059,WH-SGI-V-07060,WH-SGI-V-07061,WH-SGI-V-07062,WH-SGI-V-07063,WH-SGI-V-07064,WH-SGI-V-07067,WH-SGI-V-07068,WH-SGI-V-07069,WH-SGI-V-07070,WH-SGI-V-07071,WH-SGI-V-07073,WH-SGI-V-07074,WH-SGI-V-07165,WH-SGI-V-07166,WH-SGI-V-07167,WH-SGI-V-07169,WH-SGI-V-07170,WH-SGI-V-…
1187802_A_G	0.576	0.304	0.000118	1.58	0.437	-1.8	2.8	-0.626	1.22	1.13	0.807	-0.609	-1.41	-1.73	1.48	-1.66	MDS9	WH-SGI-V-07049,WH-SGI-V-07051,WH-SGI-V-07053,WH-SGI-V-07054,WH-SGI-V-07056,WH-SGI-V-07058,WH-SGI-V-07060,WH-SGI-V-07061,WH-SGI-V-07062,WH-SGI-V-07063,WH-SGI-V-07065,WH-SGI-V-07066,WH-SGI-V-07070,WH-SGI-V-07071,WH-SGI-V-07073,WH-SGI-V-07074,WH-SGI-V-07166,WH-SGI-V-07168,WH-SGI-V-07169,WH-SGI-V-07171,WH-SGI-V-07172,WH-SGI-V-07173,WH-SGI-V-07174,WH-SGI-V-07175,WH-SGI-V-07180,WH-SGI-V-07184,WH-SGI-V-…	WH-SGI-V-07050,WH-SGI-V-07055,WH-SGI-V-07057,WH-SGI-V-07059,WH-SGI-V-07064,WH-SGI-V-07067,WH-SGI-V-07068,WH-SGI-V-07069,WH-SGI-V-07165,WH-SGI-V-07167,WH-SGI-V-07170,WH-SGI-V-07176,WH-SGI-V-07177,WH-SGI-V-07178,WH-SGI-V-07179,WH-SGI-V-07181,WH-SGI-V-07182,WH-SGI-V-07183,WH-SGI-V-07185,WH-SGI-V-07186,WH-SGI-V-07224,WH-SGI-V-07228,WH-SGI-V-07234,WH-SGI-V-07237,WH-SGI-V-07239,WH-SGI-V-07241,WH-SGI-V-…
368729_T_C	0.295	0.0298	0.000118	-1.88	0.533	-0.367	3.15	0.659	0.192	0.483	0.965	-0.732	-1.33	-1.69	0.833	-2.17	MDS10	WH-SGI-V-07050,WH-SGI-V-07055,WH-SGI-V-07057,WH-SGI-V-07064,WH-SGI-V-07065,WH-SGI-V-07165,WH-SGI-V-07168,WH-SGI-V-07171,WH-SGI-V-07173,WH-SGI-V-07174,WH-SGI-V-07175,WH-SGI-V-07178,WH-SGI-V-07180,WH-SGI-V-07221,WH-SGI-V-07224,WH-SGI-V-07234,WH-SGI-V-07237,WH-SGI-V-07238,WH-SGI-V-07244,WH-SGI-V-07245,WH-SGI-V-07246,WH-SGI-V-07254,WH-SGI-V-07256,WH-SGI-V-07259,WH-SGI-V-07260,WH-SGI-V-07261,WH-SGI-V-…	WH-SGI-V-07049,WH-SGI-V-07051,WH-SGI-V-07053,WH-SGI-V-07054,WH-SGI-V-07056,WH-SGI-V-07058,WH-SGI-V-07059,WH-SGI-V-07060,WH-SGI-V-07061,WH-SGI-V-07062,WH-SGI-V-07063,WH-SGI-V-07066,WH-SGI-V-07067,WH-SGI-V-07068,WH-SGI-V-07069,WH-SGI-V-07070,WH-SGI-V-07071,WH-SGI-V-07073,WH-SGI-V-07074,WH-SGI-V-07166,WH-SGI-V-07167,WH-SGI-V-07169,WH-SGI-V-07170,WH-SGI-V-07172,WH-SGI-V-07176,WH-SGI-V-07177,WH-SGI-V-…
226788T_C	0.306	4.15e-05	0.000129	-1.46	0.408	-0.467	1.3	0.389	0.613	0.208	1.22	-0.944	-0.786	-0.218	-0.57	-1.24	MDS2	WH-SGI-V-07049,WH-SGI-V-07051,WH-SGI-V-07059,WH-SGI-V-07074,WH-SGI-V-07168,WH-SGI-V-07171,WH-SGI-V-07173,WH-SGI-V-07174,WH-SGI-V-07175,WH-SGI-V-07178,WH-SGI-V-07180,WH-SGI-V-07183,WH-SGI-V-07185,WH-SGI-V-07221,WH-SGI-V-07228,WH-SGI-V-07239,WH-SGI-V-07242,WH-SGI-V-07245,WH-SGI-V-07249,WH-SGI-V-07250,WH-SGI-V-07256,WH-SGI-V-07259,WH-SGI-V-07263,WH-SGI-V-07265,WH-SGI-V-07272,WH-SGI-V-07273,WH-SGI-V-…	WH-SGI-V-07050,WH-SGI-V-07053,WH-SGI-V-07054,WH-SGI-V-07055,WH-SGI-V-07056,WH-SGI-V-07057,WH-SGI-V-07058,WH-SGI-V-07060,WH-SGI-V-07061,WH-SGI-V-07062,WH-SGI-V-07063,WH-SGI-V-07064,WH-SGI-V-07065,WH-SGI-V-07066,WH-SGI-V-07067,WH-SGI-V-07068,WH-SGI-V-07069,WH-SGI-V-07070,WH-SGI-V-07071,WH-SGI-V-07073,WH-SGI-V-07165,WH-SGI-V-07166,WH-SGI-V-07167,WH-SGI-V-07169,WH-SGI-V-07170,WH-SGI-V-07172,WH-SGI-V-…
6230633_A_C	0.374	0.0238	0.000131	1.45	0.392	-1.43	2.39	-0.556	1.2	1.16	-0.0219	0.843	-0.254	-1.76	0.537	-1.51	MDS5	WH-SGI-V-07049,WH-SGI-V-07051,WH-SGI-V-07056,WH-SGI-V-07058,WH-SGI-V-07059,WH-SGI-V-07060,WH-SGI-V-07063,WH-SGI-V-07065,WH-SGI-V-07066,WH-SGI-V-07069,WH-SGI-V-07071,WH-SGI-V-07073,WH-SGI-V-07166,WH-SGI-V-07168,WH-SGI-V-07171,WH-SGI-V-07173,WH-SGI-V-07174,WH-SGI-V-07175,WH-SGI-V-07180,WH-SGI-V-07183,WH-SGI-V-07185,WH-SGI-V-07187,WH-SGI-V-07188,WH-SGI-V-07221,WH-SGI-V-07225,WH-SGI-V-07229,WH-SGI-V-…	WH-SGI-V-07050,WH-SGI-V-07053,WH-SGI-V-07054,WH-SGI-V-07055,WH-SGI-V-07057,WH-SGI-V-07061,WH-SGI-V-07062,WH-SGI-V-07064,WH-SGI-V-07067,WH-SGI-V-07068,WH-SGI-V-07070,WH-SGI-V-07074,WH-SGI-V-07165,WH-SGI-V-07167,WH-SGI-V-07169,WH-SGI-V-07170,WH-SGI-V-07172,WH-SGI-V-07176,WH-SGI-V-07177,WH-SGI-V-07178,WH-SGI-V-07179,WH-SGI-V-07181,WH-SGI-V-07182,WH-SGI-V-07184,WH-SGI-V-07186,WH-SGI-V-07222,WH-SGI-V-…
142896_C_T	0.371	0.386	0.000139	-7.03	2.08	1.7	-0.593	-5.62	0.828	-0.693	1.6	-0.58	0.308	0.886	1.38	-2.33	MDS3	WH-SGI-V-07050,WH-SGI-V-07054,WH-SGI-V-07059,WH-SGI-V-07070,WH-SGI-V-07166,WH-SGI-V-07167,WH-SGI-V-07169,WH-SGI-V-07170,WH-SGI-V-07172,WH-SGI-V-07176,WH-SGI-V-07177,WH-SGI-V-07181,WH-SGI-V-07183,WH-SGI-V-07185,WH-SGI-V-07186,WH-SGI-V-07227,WH-SGI-V-07229,WH-SGI-V-07231,WH-SGI-V-07232,WH-SGI-V-07239,WH-SGI-V-07241,WH-SGI-V-07243,WH-SGI-V-07247,WH-SGI-V-07248,WH-SGI-V-07251,WH-SGI-V-07252,WH-SGI-V-…	WH-SGI-V-07049,WH-SGI-V-07051,WH-SGI-V-07053,WH-SGI-V-07055,WH-SGI-V-07056,WH-SGI-V-07057,WH-SGI-V-07058,WH-SGI-V-07060,WH-SGI-V-07061,WH-SGI-V-07062,WH-SGI-V-07063,WH-SGI-V-07064,WH-SGI-V-07065,WH-SGI-V-07066,WH-SGI-V-07067,WH-SGI-V-07068,WH-SGI-V-07069,WH-SGI-V-07071,WH-SGI-V-07073,WH-SGI-V-07074,WH-SGI-V-07165,WH-SGI-V-07168,WH-SGI-V-07171,WH-SGI-V-07173,WH-SGI-V-07174,WH-SGI-V-07175,WH-SGI-V-…
5148673_T_C	0.122	0.00256	0.00014	-2.01	0.641	-0.675	1.59	0.157	1.27	0.664	1.32	-0.278	-0.632	-1.38	0.0259	-1.13	MDS2	WH-SGI-V-07051,WH-SGI-V-07061,WH-SGI-V-07062,WH-SGI-V-07222,WH-SGI-V-07223,WH-SGI-V-07226,WH-SGI-V-07228,WH-SGI-V-07235,WH-SGI-V-07236,WH-SGI-V-07248,WH-SGI-V-07253,WH-SGI-V-07260,WH-SGI-V-07290,WH-SGI-V-07291,WH-SGI-V-07293,WH-SGI-V-07302,WH-SGI-V-07311,WH-SGI-V-07316,WH-SGI-V-07317,WH-SGI-V-07368,WH-SGI-V-07372,WH-SGI-V-07383,WH-SGI-V-07405,WH-SGI-V-07409,WH-SGI-V-07417,WH-SGI-V-07489,WH-SGI-V-…	WH-SGI-V-07049,WH-SGI-V-07050,WH-SGI-V-07053,WH-SGI-V-07054,WH-SGI-V-07055,WH-SGI-V-07056,WH-SGI-V-07057,WH-SGI-V-07058,WH-SGI-V-07059,WH-SGI-V-07060,WH-SGI-V-07063,WH-SGI-V-07064,WH-SGI-V-07065,WH-SGI-V-07066,WH-SGI-V-07067,WH-SGI-V-07068,WH-SGI-V-07069,WH-SGI-V-07070,WH-SGI-V-07071,WH-SGI-V-07073,WH-SGI-V-07074,WH-SGI-V-07165,WH-SGI-V-07166,WH-SGI-V-07167,WH-SGI-V-07168,WH-SGI-V-07169,WH-SGI-V-…
1460358_T_G	0.723	1.65e-05	0.000144	-1.27	0.338	0.0133	0.897	-0.225	0.692	0.589	0.894	-0.244	-1.04	-0.868	-0.153	-1.92	MDS3	WH-SGI-V-07051,WH-SGI-V-07053,WH-SGI-V-07054,WH-SGI-V-07057,WH-SGI-V-07059,WH-SGI-V-07065,WH-SGI-V-07070,WH-SGI-V-07074,WH-SGI-V-07166,WH-SGI-V-07167,WH-SGI-V-07168,WH-SGI-V-07169,WH-SGI-V-07170,WH-SGI-V-07171,WH-SGI-V-07172,WH-SGI-V-07173,WH-SGI-V-07174,WH-SGI-V-07175,WH-SGI-V-07176,WH-SGI-V-07177,WH-SGI-V-07178,WH-SGI-V-07179,WH-SGI-V-07180,WH-SGI-V-07181,WH-SGI-V-07183,WH-SGI-V-07184,WH-SGI-V-…	WH-SGI-V-07049,WH-SGI-V-07050,WH-SGI-V-07055,WH-SGI-V-07056,WH-SGI-V-07058,WH-SGI-V-07060,WH-SGI-V-07061,WH-SGI-V-07062,WH-SGI-V-07063,WH-SGI-V-07064,WH-SGI-V-07066,WH-SGI-V-07067,WH-SGI-V-07068,WH-SGI-V-07069,WH-SGI-V-07071,WH-SGI-V-07073,WH-SGI-V-07165,WH-SGI-V-07182,WH-SGI-V-07187,WH-SGI-V-07188,WH-SGI-V-07225,WH-SGI-V-07226,WH-SGI-V-07228,WH-SGI-V-07234,WH-SGI-V-07240,WH-SGI-V-07241,WH-SGI-V-…
593282A_G	0.155	0.000718	0.000145	-1.82	0.565	-0.64	1.53	-0.128	1.2	0.432	0.818	0.566	-0.444	-1.02	-0.189	-1.36	MDS6	WH-SGI-V-07074,WH-SGI-V-07167,WH-SGI-V-07228,WH-SGI-V-07239,WH-SGI-V-07241,WH-SGI-V-07242,WH-SGI-V-07248,WH-SGI-V-07250,WH-SGI-V-07255,WH-SGI-V-07258,WH-SGI-V-07286,WH-SGI-V-07290,WH-SGI-V-07291,WH-SGI-V-07293,WH-SGI-V-07306,WH-SGI-V-07311,WH-SGI-V-07318,WH-SGI-V-07372,WH-SGI-V-07386,WH-SGI-V-07405,WH-SGI-V-07407,WH-SGI-V-07408,WH-SGI-V-07409,WH-SGI-V-07411,WH-SGI-V-07414,WH-SGI-V-07417,WH-SGI-V-…	WH-SGI-V-07049,WH-SGI-V-07050,WH-SGI-V-07051,WH-SGI-V-07053,WH-SGI-V-07054,WH-SGI-V-07055,WH-SGI-V-07056,WH-SGI-V-07057,WH-SGI-V-07058,WH-SGI-V-07059,WH-SGI-V-07060,WH-SGI-V-07061,WH-SGI-V-07062,WH-SGI-V-07063,WH-SGI-V-07064,WH-SGI-V-07065,WH-SGI-V-07066,WH-SGI-V-07067,WH-SGI-V-07068,WH-SGI-V-07069,WH-SGI-V-07070,WH-SGI-V-07071,WH-SGI-V-07073,WH-SGI-V-07165,WH-SGI-V-07166,WH-SGI-V-07168,WH-SGI-V-…
4168080_G_T	0.0576	0.000103	0.000147	2.17	0.622	-0.991	1.92	-0.18	0.835	0.541	1	0.0554	-0.792	-1.08	-0.0314	-1.54	MDS6	WH-SGI-V-07053,WH-SGI-V-07056,WH-SGI-V-07058,WH-SGI-V-07063,WH-SGI-V-07188,WH-SGI-V-07225,WH-SGI-V-07226,WH-SGI-V-07283,WH-SGI-V-07294,WH-SGI-V-07310,WH-SGI-V-07428,WH-SGI-V-07485,WH-SGI-V-07490,WH-SGI-V-07630,WH-SGI-V-07649,WH-SGI-V-07682	WH-SGI-V-07049,WH-SGI-V-07050,WH-SGI-V-07051,WH-SGI-V-07054,WH-SGI-V-07055,WH-SGI-V-07057,WH-SGI-V-07059,WH-SGI-V-07060,WH-SGI-V-07061,WH-SGI-V-07062,WH-SGI-V-07064,WH-SGI-V-07065,WH-SGI-V-07066,WH-SGI-V-07067,WH-SGI-V-07068,WH-SGI-V-07069,WH-SGI-V-07070,WH-SGI-V-07071,WH-SGI-V-07073,WH-SGI-V-07074,WH-SGI-V-07165,WH-SGI-V-07166,WH-SGI-V-07167,WH-SGI-V-07168,WH-SGI-V-07169,WH-SGI-V-07170,WH-SGI-V-…
391429_G_A	0.371	0.161	0.000148	-4.75	1.9	0.857	0.163	-3.74	0.789	-0.109	1.58	0.152	-0.446	-0.64	0.548	-1.32	MDS2	WH-SGI-V-07054,WH-SGI-V-07059,WH-SGI-V-07070,WH-SGI-V-07166,WH-SGI-V-07167,WH-SGI-V-07169,WH-SGI-V-07170,WH-SGI-V-07172,WH-SGI-V-07176,WH-SGI-V-07177,WH-SGI-V-07181,WH-SGI-V-07183,WH-SGI-V-07185,WH-SGI-V-07186,WH-SGI-V-07227,WH-SGI-V-07229,WH-SGI-V-07231,WH-SGI-V-07232,WH-SGI-V-07239,WH-SGI-V-07241,WH-SGI-V-07243,WH-SGI-V-07247,WH-SGI-V-07248,WH-SGI-V-07251,WH-SGI-V-07255,WH-SGI-V-07258,WH-SGI-V-…	WH-SGI-V-07049,WH-SGI-V-07050,WH-SGI-V-07051,WH-SGI-V-07053,WH-SGI-V-07055,WH-SGI-V-07056,WH-SGI-V-07057,WH-SGI-V-07058,WH-SGI-V-07060,WH-SGI-V-07061,WH-SGI-V-07062,WH-SGI-V-07063,WH-SGI-V-07064,WH-SGI-V-07065,WH-SGI-V-07066,WH-SGI-V-07067,WH-SGI-V-07068,WH-SGI-V-07069,WH-SGI-V-07071,WH-SGI-V-07073,WH-SGI-V-07074,WH-SGI-V-07165,WH-SGI-V-07168,WH-SGI-V-07171,WH-SGI-V-07173,WH-SGI-V-07174,WH-SGI-V-…
117794C_T	0.209	0.123	0.00015	1.76	0.478	-1.24	2.29	-0.573	1.88	0.819	-0.0701	1.12	-0.766	-1.02	-0.161	-1.41	MDS6	WH-SGI-V-07049,WH-SGI-V-07050,WH-SGI-V-07051,WH-SGI-V-07053,WH-SGI-V-07056,WH-SGI-V-07058,WH-SGI-V-07061,WH-SGI-V-07062,WH-SGI-V-07063,WH-SGI-V-07065,WH-SGI-V-07069,WH-SGI-V-07168,WH-SGI-V-07171,WH-SGI-V-07173,WH-SGI-V-07174,WH-SGI-V-07175,WH-SGI-V-07178,WH-SGI-V-07180,WH-SGI-V-07188,WH-SGI-V-07221,WH-SGI-V-07225,WH-SGI-V-07233,WH-SGI-V-07256,WH-SGI-V-07259,WH-SGI-V-07266,WH-SGI-V-07282,WH-SGI-V-…	WH-SGI-V-07054,WH-SGI-V-07055,WH-SGI-V-07057,WH-SGI-V-07059,WH-SGI-V-07060,WH-SGI-V-07064,WH-SGI-V-07066,WH-SGI-V-07067,WH-SGI-V-07068,WH-SGI-V-07070,WH-SGI-V-07071,WH-SGI-V-07073,WH-SGI-V-07074,WH-SGI-V-07165,WH-SGI-V-07166,WH-SGI-V-07167,WH-SGI-V-07169,WH-SGI-V-07170,WH-SGI-V-07172,WH-SGI-V-07176,WH-SGI-V-07177,WH-SGI-V-07179,WH-SGI-V-07181,WH-SGI-V-07182,WH-SGI-V-07183,WH-SGI-V-07184,WH-SGI-V-…
1177894_C_A	0.209	0.123	0.00015	1.77	0.479	-1.24	2.26	-0.584	1.92	0.769	-0.21	0.829	-0.593	-0.682	-0.011	-1.54	MDS5	WH-SGI-V-07049,WH-SGI-V-07051,WH-SGI-V-07053,WH-SGI-V-07056,WH-SGI-V-07058,WH-SGI-V-07061,WH-SGI-V-07062,WH-SGI-V-07063,WH-SGI-V-07065,WH-SGI-V-07069,WH-SGI-V-07168,WH-SGI-V-07171,WH-SGI-V-07173,WH-SGI-V-07174,WH-SGI-V-07175,WH-SGI-V-07178,WH-SGI-V-07180,WH-SGI-V-07188,WH-SGI-V-07221,WH-SGI-V-07225,WH-SGI-V-07233,WH-SGI-V-07253,WH-SGI-V-07256,WH-SGI-V-07259,WH-SGI-V-07266,WH-SGI-V-07282,WH-SGI-V-…	WH-SGI-V-07050,WH-SGI-V-07054,WH-SGI-V-07055,WH-SGI-V-07057,WH-SGI-V-07059,WH-SGI-V-07060,WH-SGI-V-07064,WH-SGI-V-07066,WH-SGI-V-07067,WH-SGI-V-07068,WH-SGI-V-07070,WH-SGI-V-07071,WH-SGI-V-07073,WH-SGI-V-07074,WH-SGI-V-07165,WH-SGI-V-07166,WH-SGI-V-07167,WH-SGI-V-07169,WH-SGI-V-07170,WH-SGI-V-07172,WH-SGI-V-07176,WH-SGI-V-07177,WH-SGI-V-07179,WH-SGI-V-07181,WH-SGI-V-07182,WH-SGI-V-07183,WH-SGI-V-…
1073028_C_T	0.212	0.00276	0.000153	-2.29	0.655	-0.438	1.26	0.687	-0.163	0.367	1.21	-0.93	-1.52	-2.54	1.14	-2.1	MDS9	WH-SGI-V-07057,WH-SGI-V-07065,WH-SGI-V-07168,WH-SGI-V-07171,WH-SGI-V-07173,WH-SGI-V-07174,WH-SGI-V-07175,WH-SGI-V-07178,WH-SGI-V-07180,WH-SGI-V-07221,WH-SGI-V-07222,WH-SGI-V-07223,WH-SGI-V-07224,WH-SGI-V-07235,WH-SGI-V-07237,WH-SGI-V-07244,WH-SGI-V-07246,WH-SGI-V-07254,WH-SGI-V-07256,WH-SGI-V-07259,WH-SGI-V-07267,WH-SGI-V-07290,WH-SGI-V-07294,WH-SGI-V-07296,WH-SGI-V-07302,WH-SGI-V-07311,WH-SGI-V-…	WH-SGI-V-07049,WH-SGI-V-07050,WH-SGI-V-07051,WH-SGI-V-07053,WH-SGI-V-07054,WH-SGI-V-07055,WH-SGI-V-07056,WH-SGI-V-07058,WH-SGI-V-07059,WH-SGI-V-07060,WH-SGI-V-07061,WH-SGI-V-07062,WH-SGI-V-07063,WH-SGI-V-07064,WH-SGI-V-07066,WH-SGI-V-07067,WH-SGI-V-07068,WH-SGI-V-07069,WH-SGI-V-07070,WH-SGI-V-07071,WH-SGI-V-07073,WH-SGI-V-07074,WH-SGI-V-07165,WH-SGI-V-07166,WH-SGI-V-07167,WH-SGI-V-07169,WH-SGI-V-…
5371630_G_T	0.327	0.0393	0.000154	-2.45	0.794	-0.123	0.997	-1.15	1.43	-1.49	1.83	1.59	-0.165	-1.72	0.442	-1.43	MDS2	WH-SGI-V-07054,WH-SGI-V-07059,WH-SGI-V-07061,WH-SGI-V-07062,WH-SGI-V-07070,WH-SGI-V-07166,WH-SGI-V-07167,WH-SGI-V-07169,WH-SGI-V-07172,WH-SGI-V-07178,WH-SGI-V-07181,WH-SGI-V-07183,WH-SGI-V-07185,WH-SGI-V-07227,WH-SGI-V-07229,WH-SGI-V-07231,WH-SGI-V-07232,WH-SGI-V-07239,WH-SGI-V-07240,WH-SGI-V-07241,WH-SGI-V-07243,WH-SGI-V-07248,WH-SGI-V-07251,WH-SGI-V-07252,WH-SGI-V-07255,WH-SGI-V-07258,WH-SGI-V-…	WH-SGI-V-07049,WH-SGI-V-07050,WH-SGI-V-07051,WH-SGI-V-07053,WH-SGI-V-07055,WH-SGI-V-07056,WH-SGI-V-07057,WH-SGI-V-07058,WH-SGI-V-07060,WH-SGI-V-07063,WH-SGI-V-07064,WH-SGI-V-07065,WH-SGI-V-07066,WH-SGI-V-07067,WH-SGI-V-07068,WH-SGI-V-07069,WH-SGI-V-07071,WH-SGI-V-07073,WH-SGI-V-07074,WH-SGI-V-07165,WH-SGI-V-07168,WH-SGI-V-07170,WH-SGI-V-07171,WH-SGI-V-07173,WH-SGI-V-07174,WH-SGI-V-07175,WH-SGI-V-…
960228_A_G	0.45	0.0642	0.000154	-1.69	0.492	-0.149	2.76	-0.584	1.38	-0.679	0.458	1.5	-0.355	-0.98	0.767	-1.94	MDS4	WH-SGI-V-07050,WH-SGI-V-07054,WH-SGI-V-07055,WH-SGI-V-07057,WH-SGI-V-07059,WH-SGI-V-07064,WH-SGI-V-07067,WH-SGI-V-07070,WH-SGI-V-07165,WH-SGI-V-07166,WH-SGI-V-07167,WH-SGI-V-07169,WH-SGI-V-07172,WH-SGI-V-07178,WH-SGI-V-07181,WH-SGI-V-07183,WH-SGI-V-07184,WH-SGI-V-07185,WH-SGI-V-07187,WH-SGI-V-07222,WH-SGI-V-07223,WH-SGI-V-07224,WH-SGI-V-07227,WH-SGI-V-07231,WH-SGI-V-07232,WH-SGI-V-07234,WH-SGI-V-…	WH-SGI-V-07049,WH-SGI-V-07051,WH-SGI-V-07053,WH-SGI-V-07056,WH-SGI-V-07058,WH-SGI-V-07060,WH-SGI-V-07061,WH-SGI-V-07062,WH-SGI-V-07063,WH-SGI-V-07065,WH-SGI-V-07066,WH-SGI-V-07068,WH-SGI-V-07069,WH-SGI-V-07071,WH-SGI-V-07073,WH-SGI-V-07074,WH-SGI-V-07168,WH-SGI-V-07170,WH-SGI-V-07171,WH-SGI-V-07173,WH-SGI-V-07174,WH-SGI-V-07175,WH-SGI-V-07176,WH-SGI-V-07177,WH-SGI-V-07179,WH-SGI-V-07180,WH-SGI-V-…
6024139_T_C	0.698	9.61e-06	0.000157	-1.45	0.4	0.121	0.748	-0.579	0.473	0.334	1.48	-0.569	-0.295	-0.129	-0.354	-1.09	MDS3	WH-SGI-V-07050,WH-SGI-V-07051,WH-SGI-V-07054,WH-SGI-V-07059,WH-SGI-V-07065,WH-SGI-V-07067,WH-SGI-V-07068,WH-SGI-V-07069,WH-SGI-V-07070,WH-SGI-V-07074,WH-SGI-V-07166,WH-SGI-V-07167,WH-SGI-V-07168,WH-SGI-V-07169,WH-SGI-V-07170,WH-SGI-V-07171,WH-SGI-V-07172,WH-SGI-V-07173,WH-SGI-V-07174,WH-SGI-V-07175,WH-SGI-V-07176,WH-SGI-V-07177,WH-SGI-V-07180,WH-SGI-V-07181,WH-SGI-V-07182,WH-SGI-V-07183,WH-SGI-V-…	WH-SGI-V-07049,WH-SGI-V-07053,WH-SGI-V-07055,WH-SGI-V-07056,WH-SGI-V-07057,WH-SGI-V-07058,WH-SGI-V-07060,WH-SGI-V-07061,WH-SGI-V-07062,WH-SGI-V-07063,WH-SGI-V-07064,WH-SGI-V-07066,WH-SGI-V-07071,WH-SGI-V-07073,WH-SGI-V-07165,WH-SGI-V-07178,WH-SGI-V-07179,WH-SGI-V-07184,WH-SGI-V-07187,WH-SGI-V-07188,WH-SGI-V-07224,WH-SGI-V-07225,WH-SGI-V-07234,WH-SGI-V-07237,WH-SGI-V-07244,WH-SGI-V-07245,WH-SGI-V-…
2166454_T_C	0.0755	0.834	0.000158	-4.47	1.57	-0.578	6.22	-0.189	1.58	-0.29	1.46	-1.72	-1.07	1.2	0.398	-2.05	MDS1	WH-SGI-V-07050,WH-SGI-V-07055,WH-SGI-V-07059,WH-SGI-V-07064,WH-SGI-V-07165,WH-SGI-V-07166,WH-SGI-V-07183,WH-SGI-V-07185,WH-SGI-V-07229,WH-SGI-V-07234,WH-SGI-V-07261,WH-SGI-V-07263,WH-SGI-V-07265,WH-SGI-V-07287,WH-SGI-V-07312,WH-SGI-V-07370,WH-SGI-V-07376,WH-SGI-V-07384,WH-SGI-V-07420,WH-SGI-V-07618,WH-SGI-V-07707	WH-SGI-V-07049,WH-SGI-V-07051,WH-SGI-V-07053,WH-SGI-V-07054,WH-SGI-V-07056,WH-SGI-V-07057,WH-SGI-V-07058,WH-SGI-V-07060,WH-SGI-V-07061,WH-SGI-V-07062,WH-SGI-V-07063,WH-SGI-V-07065,WH-SGI-V-07066,WH-SGI-V-07067,WH-SGI-V-07068,WH-SGI-V-07069,WH-SGI-V-07070,WH-SGI-V-07071,WH-SGI-V-07073,WH-SGI-V-07074,WH-SGI-V-07167,WH-SGI-V-07168,WH-SGI-V-07169,WH-SGI-V-07170,WH-SGI-V-07171,WH-SGI-V-07172,WH-SGI-V-…
4111656_C_T	0.0971	0.0173	0.000159	-3.16	1.08	-0.65	1.68	-0.251	1.54	-0.492	1.05	-1.03	-1.78	0.294	-1.08	-1.49	MDS3	WH-SGI-V-07059,WH-SGI-V-07166,WH-SGI-V-07183,WH-SGI-V-07185,WH-SGI-V-07229,WH-SGI-V-07242,WH-SGI-V-07252,WH-SGI-V-07255,WH-SGI-V-07258,WH-SGI-V-07263,WH-SGI-V-07265,WH-SGI-V-07278,WH-SGI-V-07279,WH-SGI-V-07293,WH-SGI-V-07306,WH-SGI-V-07368,WH-SGI-V-07376,WH-SGI-V-07384,WH-SGI-V-07424,WH-SGI-V-07427,WH-SGI-V-07499,WH-SGI-V-07621,WH-SGI-V-07632,WH-SGI-V-07636,WH-SGI-V-07639,WH-SGI-V-07647,WH-SGI-V-…	WH-SGI-V-07049,WH-SGI-V-07050,WH-SGI-V-07051,WH-SGI-V-07053,WH-SGI-V-07054,WH-SGI-V-07055,WH-SGI-V-07056,WH-SGI-V-07057,WH-SGI-V-07058,WH-SGI-V-07060,WH-SGI-V-07061,WH-SGI-V-07062,WH-SGI-V-07063,WH-SGI-V-07064,WH-SGI-V-07065,WH-SGI-V-07066,WH-SGI-V-07067,WH-SGI-V-07068,WH-SGI-V-07069,WH-SGI-V-07070,WH-SGI-V-07071,WH-SGI-V-07073,WH-SGI-V-07074,WH-SGI-V-07165,WH-SGI-V-07167,WH-SGI-V-07168,WH-SGI-V-…
5866570_C_G	0.371	0.386	0.000162	-6.94	2.07	1.66	-0.556	-5.55	0.83	-0.671	1.58	-0.543	0.314	0.859	1.34	-2.31	MDS2	WH-SGI-V-07050,WH-SGI-V-07054,WH-SGI-V-07059,WH-SGI-V-07070,WH-SGI-V-07166,WH-SGI-V-07167,WH-SGI-V-07169,WH-SGI-V-07170,WH-SGI-V-07172,WH-SGI-V-07176,WH-SGI-V-07177,WH-SGI-V-07181,WH-SGI-V-07183,WH-SGI-V-07185,WH-SGI-V-07186,WH-SGI-V-07227,WH-SGI-V-07229,WH-SGI-V-07231,WH-SGI-V-07232,WH-SGI-V-07239,WH-SGI-V-07241,WH-SGI-V-07243,WH-SGI-V-07247,WH-SGI-V-07248,WH-SGI-V-07251,WH-SGI-V-07252,WH-SGI-V-…	WH-SGI-V-07049,WH-SGI-V-07051,WH-SGI-V-07053,WH-SGI-V-07055,WH-SGI-V-07056,WH-SGI-V-07057,WH-SGI-V-07058,WH-SGI-V-07060,WH-SGI-V-07061,WH-SGI-V-07062,WH-SGI-V-07063,WH-SGI-V-07064,WH-SGI-V-07065,WH-SGI-V-07066,WH-SGI-V-07067,WH-SGI-V-07068,WH-SGI-V-07069,WH-SGI-V-07071,WH-SGI-V-07073,WH-SGI-V-07074,WH-SGI-V-07165,WH-SGI-V-07168,WH-SGI-V-07171,WH-SGI-V-07173,WH-SGI-V-07174,WH-SGI-V-07175,WH-SGI-V-…
5255685_C_T	0.259	0.00071	0.000163	1.59	0.438	-1.3	2.2	0.692	1.02	0.0618	0.682	0.584	-0.63	0.204	0.0742	-0.822	MDS2	WH-SGI-V-07049,WH-SGI-V-07054,WH-SGI-V-07061,WH-SGI-V-07062,WH-SGI-V-07069,WH-SGI-V-07070,WH-SGI-V-07169,WH-SGI-V-07170,WH-SGI-V-07176,WH-SGI-V-07177,WH-SGI-V-07181,WH-SGI-V-07186,WH-SGI-V-07187,WH-SGI-V-07232,WH-SGI-V-07247,WH-SGI-V-07255,WH-SGI-V-07258,WH-SGI-V-07263,WH-SGI-V-07266,WH-SGI-V-07268,WH-SGI-V-07276,WH-SGI-V-07277,WH-SGI-V-07286,WH-SGI-V-07306,WH-SGI-V-07309,WH-SGI-V-07318,WH-SGI-V-…	WH-SGI-V-07050,WH-SGI-V-07051,WH-SGI-V-07053,WH-SGI-V-07055,WH-SGI-V-07056,WH-SGI-V-07057,WH-SGI-V-07058,WH-SGI-V-07059,WH-SGI-V-07060,WH-SGI-V-07063,WH-SGI-V-07064,WH-SGI-V-07065,WH-SGI-V-07066,WH-SGI-V-07067,WH-SGI-V-07068,WH-SGI-V-07071,WH-SGI-V-07073,WH-SGI-V-07074,WH-SGI-V-07165,WH-SGI-V-07166,WH-SGI-V-07167,WH-SGI-V-07168,WH-SGI-V-07171,WH-SGI-V-07172,WH-SGI-V-07173,WH-SGI-V-07174,WH-SGI-V-…
319050T_C	0.112	0.0191	0.000163	-2.4	0.768	-0.66	2.87	0.134	1.4	0.79	0.923	0.138	-0.3	0.226	-0.569	-1.23	MDS8	WH-SGI-V-07074,WH-SGI-V-07165,WH-SGI-V-07184,WH-SGI-V-07222,WH-SGI-V-07223,WH-SGI-V-07234,WH-SGI-V-07235,WH-SGI-V-07238,WH-SGI-V-07242,WH-SGI-V-07250,WH-SGI-V-07287,WH-SGI-V-07294,WH-SGI-V-07302,WH-SGI-V-07312,WH-SGI-V-07377,WH-SGI-V-07386,WH-SGI-V-07414,WH-SGI-V-07420,WH-SGI-V-07423,WH-SGI-V-07424,WH-SGI-V-07427,WH-SGI-V-07499,WH-SGI-V-07500,WH-SGI-V-07506,WH-SGI-V-07620,WH-SGI-V-07621,WH-SGI-V-…	WH-SGI-V-07049,WH-SGI-V-07050,WH-SGI-V-07051,WH-SGI-V-07053,WH-SGI-V-07054,WH-SGI-V-07055,WH-SGI-V-07056,WH-SGI-V-07057,WH-SGI-V-07058,WH-SGI-V-07059,WH-SGI-V-07060,WH-SGI-V-07061,WH-SGI-V-07062,WH-SGI-V-07063,WH-SGI-V-07064,WH-SGI-V-07065,WH-SGI-V-07066,WH-SGI-V-07067,WH-SGI-V-07068,WH-SGI-V-07069,WH-SGI-V-07070,WH-SGI-V-07071,WH-SGI-V-07073,WH-SGI-V-07166,WH-SGI-V-07167,WH-SGI-V-07168,WH-SGI-V-…
2729826_G_A	0.0935	1.39e-06	0.000168	2.12	0.618	-1.06	-0.259	-0.184	0.833	0.468	0.585	-0.126	-0.813	-0.589	-0.0305	-1.48	MDS5	WH-SGI-V-07055,WH-SGI-V-07061,WH-SGI-V-07062,WH-SGI-V-07064,WH-SGI-V-07069,WH-SGI-V-07165,WH-SGI-V-07187,WH-SGI-V-07226,WH-SGI-V-07234,WH-SGI-V-07261,WH-SGI-V-07266,WH-SGI-V-07282,WH-SGI-V-07287,WH-SGI-V-07317,WH-SGI-V-07370,WH-SGI-V-07375,WH-SGI-V-07410,WH-SGI-V-07412,WH-SGI-V-07413,WH-SGI-V-07416,WH-SGI-V-07491,WH-SGI-V-07501,WH-SGI-V-07618,WH-SGI-V-07638,WH-SGI-V-07692,WH-SGI-V-07707	WH-SGI-V-07049,WH-SGI-V-07050,WH-SGI-V-07051,WH-SGI-V-07053,WH-SGI-V-07054,WH-SGI-V-07056,WH-SGI-V-07057,WH-SGI-V-07058,WH-SGI-V-07059,WH-SGI-V-07060,WH-SGI-V-07063,WH-SGI-V-07065,WH-SGI-V-07066,WH-SGI-V-07067,WH-SGI-V-07068,WH-SGI-V-07070,WH-SGI-V-07071,WH-SGI-V-07073,WH-SGI-V-07074,WH-SGI-V-07166,WH-SGI-V-07167,WH-SGI-V-07168,WH-SGI-V-07169,WH-SGI-V-07170,WH-SGI-V-07171,WH-SGI-V-07172,WH-SGI-V-…
3826130_G_A	0.0935	0.163	0.000169	-2.73	0.793	-0.657	1.56	0.339	1.42	0.744	0.48	-0.131	-1.5	-2.68	1.76	-2.52	NA	WH-SGI-V-07057,WH-SGI-V-07178,WH-SGI-V-07224,WH-SGI-V-07237,WH-SGI-V-07244,WH-SGI-V-07246,WH-SGI-V-07254,WH-SGI-V-07267,WH-SGI-V-07290,WH-SGI-V-07311,WH-SGI-V-07312,WH-SGI-V-07371,WH-SGI-V-07388,WH-SGI-V-07389,WH-SGI-V-07390,WH-SGI-V-07404,WH-SGI-V-07409,WH-SGI-V-07417,WH-SGI-V-07420,WH-SGI-V-07489,WH-SGI-V-07502,WH-SGI-V-07640,WH-SGI-V-07699,WH-SGI-V-07701,WH-SGI-V-07705,WH-SGI-V-07706	WH-SGI-V-07049,WH-SGI-V-07050,WH-SGI-V-07051,WH-SGI-V-07053,WH-SGI-V-07054,WH-SGI-V-07055,WH-SGI-V-07056,WH-SGI-V-07058,WH-SGI-V-07059,WH-SGI-V-07060,WH-SGI-V-07061,WH-SGI-V-07062,WH-SGI-V-07063,WH-SGI-V-07064,WH-SGI-V-07065,WH-SGI-V-07066,WH-SGI-V-07067,WH-SGI-V-07068,WH-SGI-V-07069,WH-SGI-V-07070,WH-SGI-V-07071,WH-SGI-V-07073,WH-SGI-V-07074,WH-SGI-V-07165,WH-SGI-V-07166,WH-SGI-V-07167,WH-SGI-V-…
1371208_G_A	0.194	0.202	0.00017	-2.28	0.719	-0.478	2.22	-0.647	1.15	1.99	1.31	-2.56	-1.34	-0.837	0.224	-1.24	MDS6	WH-SGI-V-07059,WH-SGI-V-07170,WH-SGI-V-07176,WH-SGI-V-07177,WH-SGI-V-07183,WH-SGI-V-07185,WH-SGI-V-07186,WH-SGI-V-07233,WH-SGI-V-07247,WH-SGI-V-07261,WH-SGI-V-07268,WH-SGI-V-07276,WH-SGI-V-07287,WH-SGI-V-07290,WH-SGI-V-07291,WH-SGI-V-07293,WH-SGI-V-07295,WH-SGI-V-07309,WH-SGI-V-07311,WH-SGI-V-07312,WH-SGI-V-07368,WH-SGI-V-07377,WH-SGI-V-07378,WH-SGI-V-07387,WH-SGI-V-07406,WH-SGI-V-07409,WH-SGI-V-…	WH-SGI-V-07049,WH-SGI-V-07050,WH-SGI-V-07051,WH-SGI-V-07053,WH-SGI-V-07054,WH-SGI-V-07055,WH-SGI-V-07056,WH-SGI-V-07057,WH-SGI-V-07058,WH-SGI-V-07060,WH-SGI-V-07061,WH-SGI-V-07062,WH-SGI-V-07063,WH-SGI-V-07064,WH-SGI-V-07065,WH-SGI-V-07066,WH-SGI-V-07067,WH-SGI-V-07068,WH-SGI-V-07069,WH-SGI-V-07070,WH-SGI-V-07071,WH-SGI-V-07073,WH-SGI-V-07074,WH-SGI-V-07165,WH-SGI-V-07166,WH-SGI-V-07167,WH-SGI-V-…
967222_T_C	0.446	0.0766	0.000173	-1.61	0.473	-0.181	2.75	-0.598	1.47	-0.66	1.35	1.07	-0.107	-1.04	0.333	-1.42	MDS4	WH-SGI-V-07050,WH-SGI-V-07054,WH-SGI-V-07055,WH-SGI-V-07059,WH-SGI-V-07060,WH-SGI-V-07061,WH-SGI-V-07062,WH-SGI-V-07064,WH-SGI-V-07067,WH-SGI-V-07070,WH-SGI-V-07165,WH-SGI-V-07166,WH-SGI-V-07167,WH-SGI-V-07169,WH-SGI-V-07172,WH-SGI-V-07178,WH-SGI-V-07181,WH-SGI-V-07183,WH-SGI-V-07184,WH-SGI-V-07185,WH-SGI-V-07222,WH-SGI-V-07223,WH-SGI-V-07227,WH-SGI-V-07228,WH-SGI-V-07229,WH-SGI-V-07231,WH-SGI-V-…	WH-SGI-V-07049,WH-SGI-V-07051,WH-SGI-V-07053,WH-SGI-V-07056,WH-SGI-V-07057,WH-SGI-V-07058,WH-SGI-V-07063,WH-SGI-V-07065,WH-SGI-V-07066,WH-SGI-V-07068,WH-SGI-V-07069,WH-SGI-V-07071,WH-SGI-V-07073,WH-SGI-V-07074,WH-SGI-V-07168,WH-SGI-V-07170,WH-SGI-V-07171,WH-SGI-V-07173,WH-SGI-V-07174,WH-SGI-V-07175,WH-SGI-V-07176,WH-SGI-V-07177,WH-SGI-V-07179,WH-SGI-V-07180,WH-SGI-V-07182,WH-SGI-V-07186,WH-SGI-V-…
92850_G_A	0.335	0.106	0.000178	2.1	0.626	-1.59	2.52	1.36	1.3	0.147	1.05	-0.994	-1.44	-0.0336	-0.2	-1.41	MDS2	WH-SGI-V-07054,WH-SGI-V-07070,WH-SGI-V-07167,WH-SGI-V-07169,WH-SGI-V-07170,WH-SGI-V-07172,WH-SGI-V-07176,WH-SGI-V-07177,WH-SGI-V-07179,WH-SGI-V-07181,WH-SGI-V-07186,WH-SGI-V-07227,WH-SGI-V-07231,WH-SGI-V-07232,WH-SGI-V-07239,WH-SGI-V-07241,WH-SGI-V-07243,WH-SGI-V-07247,WH-SGI-V-07248,WH-SGI-V-07251,WH-SGI-V-07255,WH-SGI-V-07258,WH-SGI-V-07266,WH-SGI-V-07268,WH-SGI-V-07276,WH-SGI-V-07277,WH-SGI-V-…	WH-SGI-V-07049,WH-SGI-V-07050,WH-SGI-V-07051,WH-SGI-V-07053,WH-SGI-V-07055,WH-SGI-V-07056,WH-SGI-V-07057,WH-SGI-V-07058,WH-SGI-V-07059,WH-SGI-V-07060,WH-SGI-V-07061,WH-SGI-V-07062,WH-SGI-V-07063,WH-SGI-V-07064,WH-SGI-V-07065,WH-SGI-V-07066,WH-SGI-V-07067,WH-SGI-V-07068,WH-SGI-V-07069,WH-SGI-V-07071,WH-SGI-V-07073,WH-SGI-V-07074,WH-SGI-V-07165,WH-SGI-V-07166,WH-SGI-V-07168,WH-SGI-V-07171,WH-SGI-V-…
5430228_A_G	0.18	0.000336	0.000178	-2.42	0.797	-0.499	1.36	0.536	-0.3	0.247	2.12	-1.44	-0.823	-1.4	0.105	-1.18	MDS3	WH-SGI-V-07065,WH-SGI-V-07168,WH-SGI-V-07171,WH-SGI-V-07173,WH-SGI-V-07174,WH-SGI-V-07175,WH-SGI-V-07178,WH-SGI-V-07180,WH-SGI-V-07184,WH-SGI-V-07221,WH-SGI-V-07222,WH-SGI-V-07223,WH-SGI-V-07235,WH-SGI-V-07240,WH-SGI-V-07256,WH-SGI-V-07259,WH-SGI-V-07260,WH-SGI-V-07290,WH-SGI-V-07296,WH-SGI-V-07302,WH-SGI-V-07310,WH-SGI-V-07311,WH-SGI-V-07320,WH-SGI-V-07322,WH-SGI-V-07323,WH-SGI-V-07324,WH-SGI-V-…	WH-SGI-V-07049,WH-SGI-V-07050,WH-SGI-V-07051,WH-SGI-V-07053,WH-SGI-V-07054,WH-SGI-V-07055,WH-SGI-V-07056,WH-SGI-V-07057,WH-SGI-V-07058,WH-SGI-V-07059,WH-SGI-V-07060,WH-SGI-V-07061,WH-SGI-V-07062,WH-SGI-V-07063,WH-SGI-V-07064,WH-SGI-V-07066,WH-SGI-V-07067,WH-SGI-V-07068,WH-SGI-V-07069,WH-SGI-V-07070,WH-SGI-V-07071,WH-SGI-V-07073,WH-SGI-V-07074,WH-SGI-V-07165,WH-SGI-V-07166,WH-SGI-V-07167,WH-SGI-V-…
546478T_C	0.54	0.0188	0.000183	1.47	0.42	-1.69	2.7	-0.782	1.15	0.698	0.878	-0.376	-0.72	0.0492	-0.133	-0.585	MDS2	WH-SGI-V-07049,WH-SGI-V-07050,WH-SGI-V-07051,WH-SGI-V-07053,WH-SGI-V-07054,WH-SGI-V-07056,WH-SGI-V-07057,WH-SGI-V-07058,WH-SGI-V-07060,WH-SGI-V-07061,WH-SGI-V-07062,WH-SGI-V-07063,WH-SGI-V-07065,WH-SGI-V-07066,WH-SGI-V-07067,WH-SGI-V-07069,WH-SGI-V-07070,WH-SGI-V-07071,WH-SGI-V-07073,WH-SGI-V-07168,WH-SGI-V-07169,WH-SGI-V-07171,WH-SGI-V-07173,WH-SGI-V-07174,WH-SGI-V-07175,WH-SGI-V-07179,WH-SGI-V-…	WH-SGI-V-07055,WH-SGI-V-07059,WH-SGI-V-07064,WH-SGI-V-07068,WH-SGI-V-07074,WH-SGI-V-07165,WH-SGI-V-07166,WH-SGI-V-07167,WH-SGI-V-07170,WH-SGI-V-07172,WH-SGI-V-07176,WH-SGI-V-07177,WH-SGI-V-07178,WH-SGI-V-07181,WH-SGI-V-07182,WH-SGI-V-07183,WH-SGI-V-07185,WH-SGI-V-07186,WH-SGI-V-07187,WH-SGI-V-07227,WH-SGI-V-07228,WH-SGI-V-07229,WH-SGI-V-07231,WH-SGI-V-07234,WH-SGI-V-07239,WH-SGI-V-07241,WH-SGI-V-…
[truncated: 396 more rows]
